# Supplementary material for: Epigenetic modifier balances Mapk and Wnt signalling in differentiation of goblet and Paneth cells
Source: Life Sci Alliance. 2022 Jan 21;5(4):e202101187. doi: 10.26508/lsa.202101187 (PMC8807877; doi:10.26508/lsa.202101187)
Supplement: Supplementary file 1 [file LSA-2021-01187_Supplemental_Data_1.xlsx]

## Sheet: FDR 10
Differentially regulated genes in Paneh cells isolated from day 10 bCatGOF;Mll1+/- (het) and bCatGOF;Mll1-/- (hom) mice
Ensembl_ID	Gene_Symbol	het_1	hom_1	log2FoldChange_1	pvalue_1	padj_1	het_2	hom_2	log2FoldChange_2	pvalue_2	padj_2	Chromosome	Start	End	Length	GC_Content	Strand	Biotype	Description
ENSMUSG00000036480	Prss56	0	235.9	5.21	3.54632e-54	4.33928e-50	0	235.9	5.33	5.06525e-48	3.48917e-44	1	87183313	87188405	2180	57.8	1	protein_coding	Serine protease 56 [Source:UniProtKB/Swiss-Prot;Acc:F2YMG0]
ENSMUSG00000058297	Spock2	7.6	336.1	4.15	1.9174e-41	1.17307e-37	7.6	336.1	4.1	1.49359e-36	4.65358e-33	10	60106219	60135198	5533	53.02	1	protein_coding	Testican-2 [Source:UniProtKB/Swiss-Prot;Acc:Q9ER58]
ENSMUSG00000000031	H19	0.3	132.4	4.12	7.19401e-31	1.80507e-27	0.3	132.4	4.23	8.39614e-28	2.07822e-24	7	142575529	142578143	2460	55.83	-1	lincRNA
ENSMUSG00000042988	Notum	7.7	226.2	3.77	1.28873e-34	5.25628e-31	7.7	226.2	3.92	7.89927e-39	3.3135e-35	11	120653788	120661175	2408	57.07	-1	protein_coding	Palmitoleoyl-protein carboxylesterase NOTUM [Source:UniProtKB/Swiss-Prot;Acc:Q8R116]
ENSMUSG00000001025	S100a6	76.8	1743.5	3.62	5.61296e-34	1.717e-30	76.8	1743.5	3.96	4.09645e-64	5.29028e-60	3	90612882	90624181	1367	47.42	1	protein_coding	S100 calcium binding protein A6 (calcyclin) [Source:MGI Symbol;Acc:MGI:1339467]
ENSMUSG00000026728	Vim	47.3	886	3.05	9.09062e-20	1.23592e-16	47.3	886	3.02	9.55201e-18	1.30229e-14	2	13573927	13582826	4743	43.54	1	protein_coding	vimentin [Source:MGI Symbol;Acc:MGI:98932]
ENSMUSG00000034450	Gulo	1.5	109.8	2.85	3.2194e-14	3.67176e-11	1.5	109.8	3.05	1.47933e-14	1.75952e-11	14	65986786	66009207	2263	49.09	-1	protein_coding	gulonolactone (L-) oxidase [Source:MGI Symbol;Acc:MGI:1353434]
ENSMUSG00000029648	Flt1	1.7	39.2	2.57	1.69763e-12	2.89746e-09	1.7	39.2	2.51	2.77888e-10	3.01822e-07	5	147561604	147726011	13504	46.17	-1	protein_coding	fms related tyrosine kinase 1 [Source:HGNC Symbol;Acc:HGNC:3763]
ENSMUSG00000026970	Rbms1	29.8	220.6	2.41	6.4311e-18	7.86909e-15	29.8	220.6	2.38	1.89056e-16	2.44153e-13	2	60750193	60963192	5473	42.62	-1	protein_coding	RNA-binding motif, single-stranded-interacting protein 1 [Source:UniProtKB/Swiss-Prot;Acc:Q91W59]
ENSMUSG00000031661	Nkd1	84.2	510.5	2.39	8.85672e-31	1.80618e-27	84.2	510.5	2.36	1.93848e-33	5.07238e-30	8	88521354	88594884	4558	51.89	1	protein_coding	Protein naked cuticle homolog 1 [Source:UniProtKB/Swiss-Prot;Acc:Q99MH6]
ENSMUSG00000032374	Plod2	1.7	38.6	2.36	2.14953e-10	2.04265e-07	1.7	38.6	2.5	3.53839e-10	3.01822e-07	9	92542223	92608428	5392	40.62	1	protein_coding	Procollagen-lysine,2-oxoglutarate 5-dioxygenase 2 [Source:UniProtKB/Swiss-Prot;Acc:Q9R0B9]
ENSMUSG00000018211	Wfdc15b	12.7	189.6	2.33	2.18347e-10	1.95664e-07	12.7	189.6	2.41	7.38191e-10	5.6812e-07	2	164214454	164221660	572	44.89	-1	protein_coding	WAP four-disulfide core domain 15B [Source:MGI Symbol;Acc:MGI:2445041]
ENSMUSG00000108976	Gm29797	0.5	34.2	2.3	1.17641e-09	1.10708e-06	0.5	34.2	2.37	6.37408e-09	3.97117e-06	2	181657034	181659467	755	52.42	1	protein_coding	chromosome 20 open reading frame 204 [Source:HGNC Symbol;Acc:HGNC:27655]
ENSMUSG00000001473	Tubb6	5	60.2	2.29	1.68972e-10	2.04265e-07	5	60.2	2.23	8.74506e-09	6.09415e-06	18	67390717	67402748	1757	48.35	1	protein_coding	tubulin, beta 6 class V [Source:MGI Symbol;Acc:MGI:1915201]
ENSMUSG00000022883	Robo1	3.9	51.3	2.25	6.10749e-10	3.93322e-07	3.9	51.3	2.19	1.79947e-08	9.18192e-06	16	72663149	73046095	7563	39.73	1	protein_coding	roundabout guidance receptor 1 [Source:MGI Symbol;Acc:MGI:1274781]
ENSMUSG00000000983	Wfdc18	47	457.5	2.22	2.69786e-10	2.04265e-07	47	457.5	2.34	2.89134e-10	2.66712e-07	11	83709015	83711348	1220	45.84	1	protein_coding	WAP four-disulfide core domain 18 [Source:MGI Symbol;Acc:MGI:107506]
ENSMUSG00000028175	Depdc1a	1.6	30.5	2.2	3.28065e-09	2.72751e-06	1.6	30.5	2.12	1.60458e-07	6.56583e-05	3	159495433	159529955	3323	34.69	1	protein_coding	DEP domain-containing protein 1A [Source:UniProtKB/Swiss-Prot;Acc:Q8CIG0]
ENSMUSG00000022037	Clu	9.1	173.2	2.16	1.0045e-08	4.72732e-06	9.1	173.2	2.3	1.99025e-09	1.31818e-06	14	65968483	65981547	3437	50.62	1	protein_coding	Clusterin Clusterin beta chain Clusterin alpha chain [Source:UniProtKB/Swiss-Prot;Acc:Q06890]
ENSMUSG00000046402	Rbp1	5.9	67.2	2.15	3.91825e-09	2.08451e-06	5.9	67.2	2.25	7.10478e-09	5.43963e-06	9	98422961	98446575	2652	49.41	1	protein_coding	retinol binding protein 1, cellular [Source:MGI Symbol;Acc:MGI:97876]
ENSMUSG00000043068	Fam89a	15.1	135.9	2.13	1.23579e-09	7.75187e-07	15.1	135.9	2.13	1.53462e-08	7.42761e-06	8	124740257	124751832	1338	50.39	-1	protein_coding	Protein FAM89A [Source:UniProtKB/Swiss-Prot;Acc:Q14BJ1]
ENSMUSG00000020218	Wif1	5.4	87.2	2.11	1.92797e-08	8.42524e-06	5.4	87.2	2.17	6.61562e-08	2.31254e-05	10	121033960	121100650	2427	43.49	1	protein_coding	Wnt inhibitory factor 1 [Source:MGI Symbol;Acc:MGI:1344332]
ENSMUSG00000029838	Ptn	105.1	529.6	2.1	2.99033e-20	4.57371e-17	105.1	529.6	2.06	2.63254e-25	4.04865e-22	6	36714929	36810220	3433	39.97	-1	protein_coding	pleiotrophin [Source:MGI Symbol;Acc:MGI:97804]
ENSMUSG00000007097	Atp1a2	7.3	119.5	2.09	2.58777e-08	1.05547e-05	7.3	119.5	2.16	8.56854e-08	2.91425e-05	1	172271709	172298064	7038	49.67	-1	protein_coding	Sodium/potassium-transporting ATPase subunit alpha-2 [Source:UniProtKB/Swiss-Prot;Acc:Q6PIE5]
ENSMUSG00000047844	Bex4	2.3	42.1	2.09	2.72785e-08	1.73327e-05	2.3	42.1	2.12	1.73997e-07	7.55936e-05	X	136138996	136140443	837	55.8	1	protein_coding	Protein BEX4 [Source:UniProtKB/Swiss-Prot;Acc:Q9CWT2]
ENSMUSG00000032719	Sbspon	1.6	38.7	2.05	6.13344e-08	3.5995e-05	1.6	38.7	2.22	4.71444e-08	2.31254e-05	1	15853862	15892722	2748	42.13	-1	protein_coding	Somatomedin-B and thrombospondin type-1 domain-containing protein [Source:UniProtKB/Swiss-Prot;Acc:Q3UPR9]
ENSMUSG00000031239	Itm2a	0.9	51.6	1.96	2.08661e-07	6.90046e-05	0.9	51.6	2.25	3.97584e-08	1.71064e-05	X	107397099	107403376	1744	36.33	-1	protein_coding	Integral membrane protein 2A [Source:UniProtKB/Swiss-Prot;Acc:Q61500]
ENSMUSG00000032076	Cadm1	33.4	165.2	1.91	3.0935e-11	2.91169e-08	33.4	165.2	1.84	4.50378e-12	4.91039e-09	9	47530173	47857637	10440	43.26	1	protein_coding	Cell adhesion molecule 1 [Source:UniProtKB/Swiss-Prot;Acc:Q8R5M8]
ENSMUSG00000032452	Clstn2	4	39.8	1.83	8.98308e-07	0.000426769	4	39.8	1.91	1.99858e-06	0.00062538	9	97444395	98033181	5691	43.48	-1	protein_coding	Calsyntenin-2 [Source:UniProtKB/Swiss-Prot;Acc:Q9ER65]
ENSMUSG00000019853	Hebp2	29.5	135.3	1.81	5.16732e-10	3.51263e-07	29.5	135.3	1.76	9.94206e-09	5.43963e-06	10	18539498	18546076	3930	44.02	-1	protein_coding	Heme-binding protein 2 [Source:UniProtKB/Swiss-Prot;Acc:Q9WU63]
ENSMUSG00000031328	Flna	12.6	73.3	1.81	1.11565e-07	5.42276e-05	12.6	73.3	1.76	1.59194e-06	0.000472845	X	74223461	74249820	9400	51.23	-1	protein_coding	Filamin-A [Source:UniProtKB/Swiss-Prot;Acc:Q8BTM8]
ENSMUSG00000032327	Stra6	1.1	19.7	1.81	1.68589e-06	0.000834186	1.1	19.7	1.76	1.58572e-05	0.00701638	9	58063788	58153996	5829	50.69	1	protein_coding	stimulated by retinoic acid gene 6 [Source:MGI Symbol;Acc:MGI:107742]
ENSMUSG00000029108	Pcdh7	2	38.9	1.79	2.26501e-06	0.000896093	2	38.9	2	6.31715e-07	0.00018784	5	57717967	58133230	10604	36.64	1	protein_coding	protocadherin 7 [Source:MGI Symbol;Acc:MGI:1860487]
ENSMUSG00000046618	Olfml2a	3	31.1	1.79	1.79671e-06	0.000810563	3	31.1	1.82	7.23462e-06	0.00177984	2	38931978	38963753	5579	48.28	1	protein_coding	olfactomedin-like 2A [Source:MGI Symbol;Acc:MGI:2444741]
ENSMUSG00000037736	Limch1	14.8	107.3	1.78	1.06493e-06	0.000325761	14.8	107.3	1.79	4.43687e-06	0.00109527	5	66745827	67057158	10263	44.05	1	protein_coding	LIM and calponin homology domains-containing protein 1 [Source:UniProtKB/Swiss-Prot;Acc:Q3UH68]
ENSMUSG00000034463	Scara3	0.3	16.6	1.75	3.18118e-06	0.00653713	0.3	16.6	1.72	2.22994e-05	0.00959336	14	65919394	65953935	3597	48.2	-1	protein_coding	Scavenger receptor class A member 3 [Source:UniProtKB/Swiss-Prot;Acc:Q8C850]
ENSMUSG00000009628	Tex15	16.1	83.5	1.73	1.83881e-07	6.2499e-05	16.1	83.5	1.8	3.21119e-07	9.52868e-05	8	33516738	33585582	9622	38.33	1	protein_coding	Testis-expressed protein 15 [Source:UniProtKB/Swiss-Prot;Acc:F8VPN2]
ENSMUSG00000029093	Sorcs2	20.4	95.2	1.73	4.55703e-08	1.73327e-05	20.4	95.2	1.7	2.25376e-07	8.1637e-05	5	36017180	36398139	8802	50.86	-1	protein_coding	sortilin-related VPS10 domain containing receptor 2 [Source:MGI Symbol;Acc:MGI:1932289]
ENSMUSG00000031841	Cdh13	4.7	45.4	1.72	4.59677e-06	0.00103545	4.7	45.4	2.15	3.17725e-08	1.71064e-05	8	118283733	119324921	11233	45.87	1	protein_coding	Cadherin-13 [Source:UniProtKB/Swiss-Prot;Acc:Q9WTR5]
ENSMUSG00000053613	Notumos	0.6	17.4	1.66	9.91753e-06	0.0114103	0.6	17.4	1.75	1.75398e-05	0.00755931	11	120659157	120661815	2659	63.41	1	antisense
ENSMUSG00000030772	Dkk3	42.2	243.8	1.65	4.65427e-06	0.00103545	42.2	243.8	1.71	3.23857e-06	0.000858028	7	112116017	112159057	3359	48.91	-1	protein_coding	Dickkopf-related protein 3 [Source:UniProtKB/Swiss-Prot;Acc:Q9QUN9]
ENSMUSG00000031737	Irx5	1.1	52.4	1.64	9.95586e-06	0.00204758	1.1	52.4	1.97	1.50889e-06	0.000424242	8	92357625	92376286	3127	50.91	1	protein_coding	Iroquois-class homeodomain protein IRX-5 [Source:UniProtKB/Swiss-Prot;Acc:Q9JKQ4]
ENSMUSG00000010175	Prox1	255.1	1105.5	1.62	4.58451e-07	0.000147621	255.1	1105.5	1.57	3.07283e-08	1.30016e-05	1	190118035	190170714	8390	45.14	-1	protein_coding	Prospero homeobox protein 1 [Source:UniProtKB/Swiss-Prot;Acc:P48437]
ENSMUSG00000052957	Gas1	0.4	24.1	1.6	1.59166e-05	0.00514474	0.4	24.1	1.8	1.01562e-05	0.00530689	13	60174405	60177365	2961	58.36	-1	protein_coding	Growth arrest-specific protein 1 [Source:UniProtKB/Swiss-Prot;Acc:Q01721]
ENSMUSG00000022385	Gtse1	7.5	42	1.58	1.21702e-05	0.00240185	7.5	42	1.56	6.47151e-05	0.011604	15	85859745	85876573	2742	51.17	1	protein_coding	G2 and S phase-expressed protein 1 [Source:UniProtKB/Swiss-Prot;Acc:Q8R080]
ENSMUSG00000025931	Paqr8	2.4	32.9	1.58	2.93347e-05	0.00580622	2.4	32.9	1.53	0.000180841	0.0228571	1	20890606	20939650	5488	44.42	1	protein_coding	Mus musculus progestin and adipoQ receptor family member VIII (Paqr8), transcript variant 2, mRNA. [Source:RefSeq mRNA;Acc:NM_001355122]
ENSMUSG00000025934	Gsta3	5.1	64.4	1.58	3.10329e-05	0.0083659	5.1	64.4	1.87	4.56857e-06	0.00132559	1	21240589	21265661	4344	42.76	1	protein_coding	Glutathione S-transferase A3 [Source:UniProtKB/Swiss-Prot;Acc:P30115]
ENSMUSG00000050071	Bex1	50.4	211.5	1.56	1.47011e-06	0.000428918	50.4	211.5	1.57	5.43531e-06	0.00129987	X	136213972	136215513	1186	58.17	-1	protein_coding	Protein BEX1 [Source:UniProtKB/Swiss-Prot;Acc:Q9R224]
ENSMUSG00000044033	Ccdc141	45	183.4	1.55	1.70362e-06	0.00047376	45	183.4	1.61	1.5087e-06	0.000386711	2	77009902	77170636	11717	40.98	-1	protein_coding	coiled-coil domain containing 141 [Source:MGI Symbol;Acc:MGI:1919735]
ENSMUSG00000020388	Pdlim4	0	12.4	1.54	2.87088e-05	0.0114103	0	12.4	1.49	0.000162163	0.0413959	11	54054928	54069014	2560	53.57	-1	protein_coding	PDZ and LIM domain protein 4 [Source:UniProtKB/Swiss-Prot;Acc:P70271]
ENSMUSG00000029101	Rgs12	12.4	72	1.52	3.52394e-05	0.00580622	12.4	72	1.85	8.70356e-07	0.000241046	5	34949445	35039644	8487	49.81	1	protein_coding	regulator of G-protein signaling 12 [Source:MGI Symbol;Acc:MGI:1918979]
ENSMUSG00000039232	Stx11	1.2	41.8	1.5	4.81641e-05	0.0114103	1.2	41.8	1.66	4.25845e-05	0.00790542	10	12938209	12964298	4209	43.11	-1	protein_coding	syntaxin 11 [Source:MGI Symbol;Acc:MGI:1921982]
ENSMUSG00000025473	Adam8	2.2	21.2	1.49	8.45606e-05	0.0198804	2.2	21.2	1.47	0.00031999	0.0674827	7	139978932	139992562	4638	51.69	-1	protein_coding	Disintegrin and metalloproteinase domain-containing protein 8 [Source:UniProtKB/Swiss-Prot;Acc:Q05910]
ENSMUSG00000036053	Fmnl2	42.6	156.6	1.47	2.57708e-06	0.000670918	42.6	156.6	1.49	7.88142e-06	0.00180905	2	52857860	53133804	5636	42.8	1	protein_coding	Formin-like protein 2 [Source:UniProtKB/Swiss-Prot;Acc:A2APV2]
ENSMUSG00000062210	Tnfaip8	27.7	133.9	1.47	4.1728e-05	0.00646308	27.7	133.9	1.61	1.72723e-05	0.00358698	18	49979427	50107173	10328	44.18	1	protein_coding	Tumor necrosis factor alpha-induced protein 8 [Source:UniProtKB/Swiss-Prot;Acc:Q921Z5]
ENSMUSG00000021209	Ppp4r4	6.6	35.8	1.44	9.22432e-05	0.0142812	6.6	35.8	1.5	0.00014508	0.0209186	12	103532283	103613831	4192	40.23	1	protein_coding	Serine/threonine-protein phosphatase 4 regulatory subunit 4 [Source:UniProtKB/Swiss-Prot;Acc:Q8C0Y0]
ENSMUSG00000063727	Tnfrsf11b	16	122.9	1.42	0.000172223	0.0198804	16	122.9	1.37	0.000674522	0.061137	15	54250619	54278484	2818	39.15	-1	protein_coding	tumor necrosis factor receptor superfamily, member 11b (osteoprotegerin) [Source:MGI Symbol;Acc:MGI:109587]
ENSMUSG00000028497	Hacd4	15	68.8	1.41	0.000106258	0.0138861	15	68.8	1.39	0.000253245	0.0270072	4	88396144	88438928	6756	40.13	-1	protein_coding	Very-long-chain (3R)-3-hydroxyacyl-CoA dehydratase 4 [Source:UniProtKB/Swiss-Prot;Acc:A2AKM2]
ENSMUSG00000041789	2700046A07Rik	1.6	17.3	1.39	0.000226015	0.0373158	1.6	17.3	1.4	0.000590556	0.097502	18	62751674	62756347	2469	45.98	-1	lincRNA	RIKEN cDNA 2700046A07 gene [Source:MGI Symbol;Acc:MGI:1919803]
ENSMUSG00000040690	Col16a1	9.5	40.4	1.37	0.000136979	0.0270358	9.5	40.4	1.37	0.000433584	0.0442478	4	130047840	130099283	6750	54.17	1	protein_coding	Collagen alpha-1(XVI) chain [Source:UniProtKB/Swiss-Prot;Acc:Q8BLX7]
ENSMUSG00000041189	Chrnb1	13.1	47.4	1.37	4.19792e-05	0.00653713	13.1	47.4	1.35	0.000218791	0.0270777	11	69784036	69795943	2531	46.37	-1	protein_coding	cholinergic receptor, nicotinic, beta polypeptide 1 (muscle) [Source:MGI Symbol;Acc:MGI:87890]
ENSMUSG00000029223	Uchl1	1	21.5	1.36	0.000226085	0.106964	1	21.5	1.45	0.000319502	0.0724793	5	66676091	66687234	1632	48.03	1	protein_coding	ubiquitin carboxy-terminal hydrolase L1 [Source:MGI Symbol;Acc:MGI:103149]
ENSMUSG00000038415	Foxq1	12.3	48.5	1.36	0.000101839	0.0132564	12.3	48.5	1.26	0.000570928	0.0542457	13	31556134	31560976	4843	56.58	1	protein_coding	Forkhead box protein Q1 [Source:UniProtKB/Swiss-Prot;Acc:O70220]
ENSMUSG00000023066	Rttn	8.1	36.5	1.35	0.000242839	0.0379667	8.1	36.5	1.36	0.000589075	0.0589339	18	88971790	89131013	7268	37.4	1	protein_coding	Rotatin [Source:UniProtKB/Swiss-Prot;Acc:Q8R4Y8]
ENSMUSG00000039994	Timeless	12.1	43.9	1.34	7.03276e-05	0.0157034	12.1	43.9	1.39	0.000114878	0.0159892	10	128232065	128252941	6115	50.7	1	protein_coding	timeless circadian regulator [Source:HGNC Symbol;Acc:HGNC:11813]
ENSMUSG00000022442	Ttll1	10.6	62.7	1.32	0.000453028	0.0586978	10.6	62.7	1.65	2.12221e-05	0.00484885	15	83483769	83510893	2911	49.51	-1	protein_coding	tubulin tyrosine ligase-like 1 [Source:MGI Symbol;Acc:MGI:2443047]
ENSMUSG00000026778	Prkcq	2.3	18.5	1.31	0.000531374	0.0650531	2.3	18.5	1.5	0.000224069	0.0541379	2	11172108	11301222	7081	43.48	1	protein_coding	protein kinase C, theta [Source:MGI Symbol;Acc:MGI:97601]
ENSMUSG00000027351	Spred1	31.2	97.4	1.31	1.71551e-05	0.00318045	31.2	97.4	1.19	3.71911e-05	0.00647525	2	117121374	117182279	6784	37.86	1	protein_coding	Sprouty-related, EVH1 domain-containing protein 1 [Source:UniProtKB/Swiss-Prot;Acc:Q924S8]
ENSMUSG00000031760	Mt3	7.9	39.4	1.31	0.000473571	0.0619235	7.9	39.4	1.27	0.00126497	0.08946	8	94152607	94154146	1066	56.3	1	protein_coding	Metallothionein-3 [Source:UniProtKB/Swiss-Prot;Acc:P28184]
ENSMUSG00000050295	Foxc1	12.3	43	1.31	0.000124932	0.0251063	12.3	43	1.3	0.000367344	0.0416453	13	31806633	31812476	5844	55.94	1	protein_coding	Forkhead box protein C1 [Source:UniProtKB/Swiss-Prot;Acc:Q61572]
ENSMUSG00000026117	Zap70	2.1	20.4	1.3	0.000547546	0.181166	2.1	20.4	1.28	0.00147723	0.178128	1	36761798	36782818	2992	51.54	1	protein_coding	zeta-chain (TCR) associated protein kinase [Source:MGI Symbol;Acc:MGI:99613]
ENSMUSG00000019577	Pdk4	12.8	59.7	1.29	0.00054666	0.0682451	12.8	59.7	1.33	0.000829338	0.0682425	6	5483351	5496309	3511	40.66	-1	protein_coding	pyruvate dehydrogenase kinase, isoenzyme 4 [Source:MGI Symbol;Acc:MGI:1351481]
ENSMUSG00000019846	Lama4	4.2	30.2	1.29	0.000679749	0.0619235	4.2	30.2	1.4	0.000597089	0.0622788	10	38965515	39110188	12068	40.82	1	protein_coding	Laminin subunit alpha-4 [Source:UniProtKB/Swiss-Prot;Acc:P97927]
ENSMUSG00000036158	Prickle1	4.9	24.5	1.29	0.000579339	0.0682451	4.9	24.5	1.39	0.000548808	0.0532456	15	93499114	93595891	4345	45.21	-1	protein_coding	Prickle-like protein 1 [Source:UniProtKB/Swiss-Prot;Acc:Q3U5C7]
ENSMUSG00000041836	Ptpre	52.2	154.3	1.29	7.90084e-06	0.0016668	52.2	154.3	1.25	6.37252e-05	0.0100912	7	135537481	135686293	10201	47.73	1	protein_coding	Receptor-type tyrosine-protein phosphatase epsilon [Source:UniProtKB/Swiss-Prot;Acc:P49446]
ENSMUSG00000054951	9130008F23Rik	9.2	51.3	1.29	0.0006068	0.0619235	9.2	51.3	1.57	6.36876e-05	0.00968897	17	40875482	40880558	2159	43.39	-1	protein_coding	RIKEN cDNA 9130008F23 gene [Source:MGI Symbol;Acc:MGI:1918833]
ENSMUSG00000029664	Tfpi2	37.6	115.6	1.28	3.37972e-05	0.00558841	37.6	115.6	1.4	1.0433e-05	0.00247817	6	3962595	3988919	1747	38.85	-1	protein_coding	tissue factor pathway inhibitor 2 [Source:MGI Symbol;Acc:MGI:108543]
ENSMUSG00000031538	Plat	4.5	47.3	1.26	0.00076666	0.0724589	4.5	47.3	1.4	0.000621744	0.0582702	8	22757727	22782844	6241	47.08	1	protein_coding	Tissue-type plasminogen activator Tissue-type plasminogen activator chain A Tissue-type plasminogen activator chain B [Source:UniProtKB/Swiss-Prot;Acc:P11214]
ENSMUSG00000031595	Pdgfrl	11.7	90	1.26	0.00082429	0.0619235	11.7	90	1.53	0.000185699	0.0217053	8	40926212	40990785	3126	43.65	1	protein_coding	platelet derived growth factor receptor like [Source:HGNC Symbol;Acc:HGNC:8805]
ENSMUSG00000111397	Gm48232	0	10.6	1.26	0.000399426	1	0	10.6	1.26	0.000952509	1	10	30511760	30514123	2364	41.29	-1	TEC	predicted gene, 48232 [Source:MGI Symbol;Acc:MGI:6097638]
ENSMUSG00000021485	Mxd3	2.9	16	1.25	0.000924601	0.0959758	2.9	16	1.27	0.00177716	0.192023	13	55325168	55329823	2369	54.9	-1	protein_coding	Max dimerization protein 3 [Source:UniProtKB/Swiss-Prot;Acc:Q80US8]
ENSMUSG00000024691	Fam111a	26.8	77.7	1.25	1.59503e-05	0.00300258	26.8	77.7	1.26	8.18409e-05	0.012202	19	12545740	12589768	4125	41.19	1	protein_coding	Protein FAM111A [Source:UniProtKB/Swiss-Prot;Acc:Q9D2L9]
ENSMUSG00000028517	Plpp3	40	117.9	1.25	2.91873e-05	0.00503007	40	117.9	1.31	4.84273e-05	0.00773769	4	105157347	105232764	3159	46.41	1	protein_coding	Phospholipid phosphatase 3 [Source:UniProtKB/Swiss-Prot;Acc:Q99JY8]
ENSMUSG00000014599	Csf1	6.9	38	1.24	0.00107989	0.109641	6.9	38	1.2	0.00292184	0.166788	3	107741048	107760469	5281	51.22	-1	protein_coding	Macrophage colony-stimulating factor 1 Processed macrophage colony-stimulating factor 1 [Source:UniProtKB/Swiss-Prot;Acc:P07141]
ENSMUSG00000027078	Ube2l6	4.4	20.1	1.24	0.000899188	0.236468	4.4	20.1	1.16	0.00400165	0.293727	2	84798828	84810335	1996	48.11	1	protein_coding	ubiquitin-conjugating enzyme E2L 6 [Source:MGI Symbol;Acc:MGI:1914500]
ENSMUSG00000044254	Pcsk9	31.8	112.3	1.24	0.000478282	0.0421026	31.8	112.3	1.31	8.23685e-05	0.012202	4	106442329	106464329	3521	52.57	-1	protein_coding	Proprotein convertase subtilisin/kexin type 9 [Source:UniProtKB/Swiss-Prot;Acc:Q80W65]
ENSMUSG00000049907	Rasl11b	10.5	42.2	1.24	0.000718747	0.0586978	10.5	42.2	1.34	0.000657994	0.0602338	5	74195286	74199481	2161	50.62	1	protein_coding	Ras-like protein family member 11B [Source:UniProtKB/Swiss-Prot;Acc:Q922H7]
ENSMUSG00000054555	Adam12	0.2	13.9	1.23	0.000541705	0.230064	0.2	13.9	1.41	0.000392852	0.184079	7	133883199	134232146	10573	44.41	-1	protein_coding	Disintegrin and metalloproteinase domain-containing protein 12 [Source:UniProtKB/Swiss-Prot;Acc:Q61824]
ENSMUSG00000017390	Aldoc	28.1	82.8	1.22	6.97801e-05	0.010045	28.1	82.8	1.16	0.000465571	0.0464792	11	78322968	78327781	3263	52.45	1	protein_coding	Fructose-bisphosphate aldolase C [Source:UniProtKB/Swiss-Prot;Acc:P05063]
ENSMUSG00000096950	Gm9530	4.4	23.1	1.21	0.00132649	0.288822	4.4	23.1	1.38	0.000651451	0.110247	1	155063447	155083266	3281	49.19	-1	lincRNA	predicted gene 9530 [Source:MGI Symbol;Acc:MGI:3779939]
ENSMUSG00000061517	Sox21	1.8	36.2	1.2	0.000882313	0.0917301	1.8	36.2	1.29	0.00117025	0.088585	14	118233232	118237030	3799	58.33	-1	protein_coding	Transcription factor SOX-21 [Source:UniProtKB/Swiss-Prot;Acc:Q811W0]
ENSMUSG00000096918	Gm16863	2.6	21.4	1.2	0.00137832	0.140328	2.6	21.4	1.29	0.00157794	0.176662	16	21247518	21296872	2431	49.17	-1	lincRNA	predicted gene, 16863 [Source:MGI Symbol;Acc:MGI:4439787]
ENSMUSG00000024056	Ndc80	27.9	104.5	1.19	0.00112556	0.0751258	27.9	104.5	1.24	0.00140927	0.0971313	17	71496100	71526857	2201	41.67	-1	protein_coding	Kinetochore [Source:UniProtKB/Swiss-Prot;Acc:Q9D0F1]
ENSMUSG00000032251	Irak1bp1	2.7	17.8	1.19	0.00166572	0.32672	2.7	17.8	1.29	0.00164435	0.184079	9	82829540	82847687	2158	41.17	1	protein_coding	Interleukin-1 receptor-associated kinase 1-binding protein 1 [Source:UniProtKB/Swiss-Prot;Acc:Q9ESJ7]
ENSMUSG00000032418	Me1	6.1	57.1	1.19	0.00140569	0.120379	6.1	57.1	1.23	0.00241851	0.158004	9	86581371	86695953	3848	41.64	-1	protein_coding	NADP-dependent malic enzyme [Source:UniProtKB/Swiss-Prot;Acc:P06801]
ENSMUSG00000078664	Sprr2a1	10.2	257.5	1.19	0.000875264	0.0633712	10.2	257.5	1.6	7.22832e-05	0.010106	3	92215799	92221911	3003	40.44	1	protein_coding	Small proline-rich protein 2A3 [Source:UniProtKB/Swiss-Prot;Acc:Q4KL71]
ENSMUSG00000020231	Dip2a	14.4	40.3	1.18	9.21404e-05	0.0198804	14.4	40.3	1.2	0.00031826	0.0418996	10	76259429	76345291	8215	47.15	-1	protein_coding	Disco-interacting A [Source:UniProtKB/Swiss-Prot;Acc:Q8BWT5]
ENSMUSG00000044674	Fzd1	5.7	33.6	1.18	0.00192573	0.148373	5.7	33.6	1.71	1.27934e-05	0.00283697	5	4753839	4758035	4197	55.66	-1	protein_coding	Frizzled-1 [Source:UniProtKB/Swiss-Prot;Acc:O70421]
ENSMUSG00000069874	Irgm2	27	123	1.18	0.00183772	0.10657	27	123	1.05	0.00852553	0.280742	11	58199618	58222782	3690	47.03	1	protein_coding
ENSMUSG00000006205	Htra1	8	52.9	1.17	0.00199855	0.158349	8	52.9	1.2	0.0032384	0.175592	7	130936111	130985660	2879	48.47	1	protein_coding	Serine protease HTRA1 [Source:UniProtKB/Swiss-Prot;Acc:Q9R118]
ENSMUSG00000006369	Fbln1	81.8	197.4	1.17	1.27007e-08	5.75575e-06	81.8	197.4	1.14	9.95865e-07	0.000260692	15	85205949	85286535	4368	50.36	1	protein_coding	Mus musculus fibulin 1 (Fbln1), transcript variant 2, mRNA. [Source:RefSeq mRNA;Acc:NM_001347088]
ENSMUSG00000020900	Myh10	12.6	35.8	1.17	0.000231913	0.0385459	12.6	35.8	1.12	0.00150292	0.115566	11	68691559	68816632	10458	45.72	1	protein_coding	Myosin-10 [Source:UniProtKB/Swiss-Prot;Acc:Q61879]
ENSMUSG00000023940	Sgo1	36.8	103.4	1.17	0.000167828	0.0198804	36.8	103.4	1.18	0.00042537	0.0413959	17	53674786	53689333	3810	39.98	-1	protein_coding	Shugoshin 1 [Source:UniProtKB/Swiss-Prot;Acc:Q9CXH7]
ENSMUSG00000016386	Mpped2	0.3	10.8	1.16	0.00113593	0.345659	0.3	10.8	1.14	0.00278278	0.247628	2	106693269	106868356	3425	43.66	1	protein_coding	Metallophosphoesterase MPPED2 [Source:UniProtKB/Swiss-Prot;Acc:Q9CZJ0]
ENSMUSG00000025142	Aspscr1	39.9	107.1	1.16	8.76315e-05	0.0120479	39.9	107.1	1.17	0.000268768	0.0276827	11	120672973	120709447	4770	52.72	1	protein_coding	Tether containing UBX domain for GLUT4 [Source:UniProtKB/Swiss-Prot;Acc:Q8VBT9]
ENSMUSG00000071019	Sdr16c6	7.4	29.9	1.16	0.00178539	0.148373	7.4	29.9	1.09	0.00665678	0.247628	4	4055929	4077522	1933	37.6	-1	protein_coding	Short-chain dehydrogenase/reductase family 16C member 6 [Source:UniProtKB/Swiss-Prot;Acc:Q05A13]
ENSMUSG00000028780	Sema3c	115	351.1	1.15	0.000788536	0.0614556	115	351.1	1.04	0.00167418	0.102957	5	17574281	17730268	7140	37.48	1	protein_coding	Semaphorin-3C [Source:UniProtKB/Swiss-Prot;Acc:Q62181]
ENSMUSG00000029762	Akr1b8	9.4	38.8	1.15	0.00205058	0.112515	9.4	38.8	1.47	0.000117665	0.0162048	6	34354119	34368463	1499	45.23	1	protein_coding	Aldose reductase-related protein 2 [Source:UniProtKB/Swiss-Prot;Acc:P45377]
ENSMUSG00000033060	Lmo7	393.6	1016.8	1.15	3.19063e-05	0.00534802	393.6	1016.8	1.02	0.000156741	0.0190422	14	101729957	101934710	11951	41.94	1	protein_coding	Mus musculus LIM domain only 7 (Lmo7), transcript variant 2, mRNA. [Source:RefSeq mRNA;Acc:NM_001347628]
ENSMUSG00000024521	Pmaip1	38.8	109.6	1.14	0.000347337	0.0351241	38.8	109.6	1.36	1.8839e-05	0.00370424	18	66458604	66465550	2646	43.24	1	protein_coding	phorbol-12-myristate-13-acetate-induced protein 1 [Source:MGI Symbol;Acc:MGI:1930146]
ENSMUSG00000025491	Ifitm1	125.2	1047	1.14	0.00222453	0.121841	125.2	1047	2.23	1.21511e-09	8.71791e-07	7	140967221	140969825	1094	48.68	1	protein_coding	Interferon-induced transmembrane protein 1 [Source:UniProtKB/Swiss-Prot;Acc:Q9D103]
ENSMUSG00000027210	Meis2	6	32.4	1.14	0.00264172	0.148586	6	32.4	1.27	0.00174372	0.127859	2	115863064	116065839	12043	41.51	-1	protein_coding	Homeobox protein Meis2 [Source:UniProtKB/Swiss-Prot;Acc:P97367]
ENSMUSG00000044991	1110034G24Rik	33.8	89.1	1.14	0.000105567	0.0138861	33.8	89.1	1.14	0.000358151	0.0413959	2	132686931	132751055	2117	44.96	1	protein_coding	RIKEN cDNA 1110034G24 gene [Source:MGI Symbol;Acc:MGI:1920997]
ENSMUSG00000052212	Cd177	65.1	159.6	1.14	4.99948e-06	0.00110038	65.1	159.6	1.15	2.68265e-05	0.00492624	7	24743983	24760311	2840	52.26	-1	protein_coding	CD177 antigen [Source:UniProtKB/Swiss-Prot;Acc:Q8R2S8]
ENSMUSG00000073409	H2-Q6	7.4	31.2	1.14	0.00250347	0.173223	7.4	31.2	1.06	0.00881271	0.31191	17	35424850	35430055	2085	53.03	1	protein_coding	histocompatibility 2, Q region locus 6 [Source:MGI Symbol;Acc:MGI:95935]
ENSMUSG00000110266	Gm32742	16.5	56.5	1.14	0.00167436	0.100507	16.5	56.5	1.18	0.0024016	0.1444	9	51130307	51165517	8516	47.21	-1	protein_coding
ENSMUSG00000012519	Mlkl	14.9	42.4	1.13	0.000532104	0.0631982	14.9	42.4	1.12	0.00168268	0.10683	8	111311797	111338177	2303	44.72	-1	protein_coding	Mixed lineage kinase domain-like protein [Source:UniProtKB/Swiss-Prot;Acc:Q9D2Y4]
ENSMUSG00000035104	Eva1a	3.4	21.6	1.13	0.00271683	0.192767	3.4	21.6	1.22	0.00293628	0.247628	6	82041043	82093099	2805	46.8	1	protein_coding	A [Source:UniProtKB/Swiss-Prot;Acc:Q91WM6]
ENSMUSG00000037016	Frem2	11.6	41.7	1.13	0.00217193	0.156453	11.6	41.7	1.2	0.00232773	0.146772	3	53513938	53657355	13255	43.86	-1	protein_coding	FRAS1-related extracellular matrix protein 2 [Source:UniProtKB/Swiss-Prot;Acc:Q6NVD0]
ENSMUSG00000089901	Gm8113	4.9	31.9	1.13	0.00268974	0.187817	4.9	31.9	1.33	0.00117552	0.0933449	14	43925390	43933411	2721	43.11	1	protein_coding
ENSMUSG00000027346	Gpcpd1	187.9	529	1.12	0.000643533	0.0552208	187.9	529	1.05	0.00206944	0.117217	2	132529082	132587729	7289	39.28	-1	protein_coding	glycerophosphocholine phosphodiesterase 1 [Source:MGI Symbol;Acc:MGI:104898]
ENSMUSG00000034361	Cpne2	9	27	1.12	0.00113991	0.109641	9	27	1.13	0.00269748	0.146772	8	94532990	94570531	3200	51.88	1	protein_coding	Copine-2 [Source:UniProtKB/Swiss-Prot;Acc:P59108]
ENSMUSG00000060548	Tnfrsf19	145.4	372.3	1.12	9.58956e-05	0.0130306	145.4	372.3	1.04	0.000300274	0.0297133	14	60963875	61046490	4738	44.72	-1	protein_coding	Tumor necrosis factor receptor superfamily member 19 [Source:UniProtKB/Swiss-Prot;Acc:Q9JLL3]
ENSMUSG00000018920	Cxcl16	11.1	30.9	1.11	0.000666412	0.0751258	11.1	30.9	1.13	0.0015592	0.111083	11	70453983	70459984	3021	47.42	-1	protein_coding	C-X-C motif chemokine 16 [Source:UniProtKB/Swiss-Prot;Acc:Q8BSU2]
ENSMUSG00000027333	Smox	70.1	166.9	1.11	2.41687e-06	0.000642887	70.1	166.9	1.09	3.17447e-05	0.00557955	2	131491496	131525922	3894	50.43	1	protein_coding	spermine oxidase [Source:MGI Symbol;Acc:MGI:2445356]
ENSMUSG00000028621	Cyb5rl	6.3	22.5	1.11	0.0026194	0.402433	6.3	22.5	1.18	0.00284635	0.245489	4	107066988	107088268	7430	50.24	1	protein_coding	NADH-cytochrome b5 reductase-like [Source:UniProtKB/Swiss-Prot;Acc:B1AS42]
ENSMUSG00000037035	Inhbb	4.2	20.5	1.11	0.00330997	0.438501	4.2	20.5	1.09	0.00792766	0.425023	1	119415465	119422248	4255	58.15	-1	protein_coding	Inhibin beta B chain [Source:UniProtKB/Swiss-Prot;Acc:Q04999]
ENSMUSG00000044934	Zfp367	32.3	94.3	1.11	0.00102188	0.0698535	32.3	94.3	1.22	0.000560776	0.0540263	13	64133018	64153202	5514	40.57	-1	protein_coding	zinc finger protein 367 [Source:MGI Symbol;Acc:MGI:2442266]
ENSMUSG00000073599	Ecscr	61.8	148.6	1.11	4.93939e-06	0.00110038	61.8	148.6	1.12	3.61803e-05	0.00648441	18	35713086	35722356	1680	49.9	-1	protein_coding	Endothelial cell-specific chemotaxis regulator [Source:UniProtKB/Swiss-Prot;Acc:Q3TZW0]
ENSMUSG00000086712	AI427809	22.8	75.7	1.11	0.00197544	0.13887	22.8	75.7	1.19	0.00173218	0.114334	4	53261356	53270232	2369	46.72	-1	lincRNA	expressed sequence AI427809 [Source:MGI Symbol;Acc:MGI:2140270]
ENSMUSG00000006711	D130043K22Rik	4	16.6	1.1	0.0033502	0.220257	4	16.6	1.21	0.00268768	0.237477	13	24845135	24901270	5276	45.08	1	protein_coding	Dyslexia-associated [Source:UniProtKB/Swiss-Prot;Acc:Q5SZV5]
ENSMUSG00000019966	Kitl	122	340.3	1.1	0.000898205	0.0646496	122	340.3	1.03	0.00145254	0.0971313	10	100015630	100100416	5911	41.17	1	protein_coding	Kit ligand Soluble KIT ligand [Source:UniProtKB/Swiss-Prot;Acc:P20826]
ENSMUSG00000078853	Igtp	21.6	103.9	1.1	0.00359944	0.158349	21.6	103.9	1.04	0.0104459	0.300443	11	58199556	58207591	2022	46.67	1	protein_coding
ENSMUSG00000007080	Pole	27.1	91.5	1.09	0.00268194	0.136734	27.1	91.5	1.29	0.00045675	0.0424805	5	110286306	110337474	11160	44.46	1	protein_coding	polymerase (DNA directed), epsilon [Source:MGI Symbol;Acc:MGI:1196391]
ENSMUSG00000020926	Adam11	0.8	15.8	1.09	0.00233192	0.236468	0.8	15.8	1.37	0.000622987	0.234981	11	102761439	102780262	5669	57.48	1	protein_coding	Disintegrin and metalloproteinase domain-containing protein 11 [Source:UniProtKB/Swiss-Prot;Acc:Q9R1V4]
ENSMUSG00000039607	Rbms3	72.4	227.8	1.09	0.00231874	0.121248	72.4	227.8	1.27	1.28636e-05	0.00290525	9	116572746	117629913	10413	42.83	-1	protein_coding	RNA binding motif, single stranded interacting protein [Source:MGI Symbol;Acc:MGI:2444477]
ENSMUSG00000019647	Sema6a	13.4	51.5	1.08	0.00423966	0.177297	13.4	51.5	1.05	0.00652121	0.237477	18	47235598	47368870	8778	43.86	-1	protein_coding	Semaphorin-6A [Source:UniProtKB/Swiss-Prot;Acc:O35464]
ENSMUSG00000022780	Meltf	0.7	10.9	1.08	0.00282122	0.245344	0.7	10.9	1.07	0.00587947	0.362291	16	31878810	31899020	4133	54	1	protein_coding	Melanotransferrin [Source:UniProtKB/Swiss-Prot;Acc:Q9R0R1]
ENSMUSG00000030208	Emp1	11.6	38.3	1.08	0.00300176	0.199267	11.6	38.3	1.1	0.00503129	0.205518	6	135362545	135383173	5935	46.2	1	protein_coding	Epithelial membrane protein 1 [Source:UniProtKB/Swiss-Prot;Acc:P47801]
ENSMUSG00000031617	Tmem184c	54.3	130.6	1.08	9.90336e-05	0.0131695	54.3	130.6	1.04	0.000218036	0.0250233	8	77595982	77610698	2723	41.52	-1	protein_coding	Transmembrane protein 184C [Source:UniProtKB/Swiss-Prot;Acc:Q3TPR7]
ENSMUSG00000048070	Pirt	12.9	45.1	1.08	0.00367532	0.191796	12.9	45.1	1.02	0.00493416	0.228048	11	66911981	66929876	4200	47.04	1	protein_coding	Phosphoinositide-interacting protein [Source:UniProtKB/Swiss-Prot;Acc:Q8BFY0]
ENSMUSG00000051397	Tacstd2	0	16.5	1.08	0.00157468	0.392471	0	16.5	1.23	0.00117659	0.332043	6	67534062	67535796	1735	54.29	-1	protein_coding	Tumor-associated calcium signal transducer 2 [Source:UniProtKB/Swiss-Prot;Acc:Q8BGV3]
ENSMUSG00000004552	Ctse	1	10.3	1.07	0.00359122	0.572566	1	10.3	1.02	0.00930083	0.433263	1	131638306	131675505	3170	46.74	1	protein_coding	cathepsin E [Source:MGI Symbol;Acc:MGI:107361]
ENSMUSG00000075304	Sp5	29.9	93.4	1.07	0.00298092	0.143855	29.9	93.4	1.08	0.00515726	0.20336	2	70474923	70477729	2100	61.06	1	protein_coding	Transcription factor Sp5 [Source:UniProtKB/Swiss-Prot;Acc:Q9JHX2]
ENSMUSG00000094683	Ap3m1-ps	7.6	26	1.07	0.00397758	0.222952	7.6	26	1.16	0.00348789	0.175592	10	82585426	82586683	1258	42.21	1	processed_pseudogene	adaptor-related protein complex 3, mu 1 subunit, pseudogene [Source:MGI Symbol;Acc:MGI:3645307]
ENSMUSG00000017466	Timp2	21.4	53.9	1.06	0.000719876	0.05795	21.4	53.9	0.98	0.00352018	0.166788	11	118301069	118355740	3896	49.86	-1	protein_coding	tissue inhibitor of metalloproteinase 2 [Source:MGI Symbol;Acc:MGI:98753]
ENSMUSG00000029832	Nfe2l3	18.5	68.8	1.06	0.00478734	0.188276	18.5	68.8	1.24	0.00183819	0.109308	6	51432670	51458768	2973	46.16	1	protein_coding	nuclear factor, erythroid derived 2, like 3 [Source:MGI Symbol;Acc:MGI:1339958]
ENSMUSG00000065968	Ifitm7	5.5	33.3	1.06	0.00469488	0.239588	5.5	33.3	1.31	0.00138318	0.0952461	16	13981699	13986888	2376	43.49	-1	protein_coding	interferon induced transmembrane protein 7 [Source:RefSeq peptide;Acc:NP_001257647]
ENSMUSG00000041779	Tram2	1.8	14.2	1.05	0.00468982	0.633296	1.8	14.2	1.25	0.00203756	0.215678	1	20996299	21079229	6661	46.88	-1	protein_coding	Translocating chain-associated membrane protein 2 [Source:UniProtKB/Swiss-Prot;Acc:Q924Z5]
ENSMUSG00000101335	Gm28229	5.1	17.6	1.05	0.00470867	0.245344	5.1	17.6	1.1	0.00558883	0.349726	9	88441500	88443652	2153	37.16	-1	sense_intronic	predicted gene 28229 [Source:MGI Symbol;Acc:MGI:5578935]
ENSMUSG00000109086	Gm5596	1	20.3	1.05	0.00290762	0.417084	1	20.3	1.38	0.000538807	0.0971313	7	57878806	57881226	2421	36.02	-1	processed_pseudogene	predicted gene 5596 [Source:MGI Symbol;Acc:MGI:3646954]
ENSMUSG00000045333	Zfp423	0.9	14.8	1.04	0.00345231	0.544923	0.9	14.8	1.06	0.0066699	0.378565	8	87661810	87959595	5608	49.76	-1	protein_coding	zinc finger protein 423 [Source:MGI Symbol;Acc:MGI:1891217]
ENSMUSG00000078161	Erich3	0.7	13.4	1.04	0.00317805	0.537588	0.7	13.4	1.04	0.0065919	0.376596	3	154663859	154767790	8963	41.98	1	protein_coding
ENSMUSG00000106450	Gm43018	0.9	15.9	1.04	0.003296	0.271282	0.9	15.9	1.62	6.85265e-05	0.0228571	5	132439255	132440529	1275	41.1	-1	TEC	predicted gene 43018 [Source:MGI Symbol;Acc:MGI:5663155]
ENSMUSG00000020653	Klf11	29.9	74.5	1.03	0.00114799	0.0962064	29.9	74.5	1	0.00299985	0.146888	12	24651274	24662789	4340	48.1	1	protein_coding	Krueppel-like factor 11 [Source:UniProtKB/Swiss-Prot;Acc:Q8K1S5]
ENSMUSG00000024424	Ttc39c	4.9	16.6	1.03	0.0053473	0.265694	4.9	16.6	1.02	0.0112216	0.475787	18	12599926	12737050	5197	45.96	1	protein_coding	tetratricopeptide repeat domain 39C [Source:MGI Symbol;Acc:MGI:1919997]
ENSMUSG00000036777	Anln	42.2	119.1	1.03	0.00303227	0.144756	42.2	119.1	1.05	0.00460973	0.184079	9	22332012	22389188	9063	41.74	-1	protein_coding	Anillin [Source:UniProtKB/Swiss-Prot;Acc:Q8K298]
ENSMUSG00000020536	Llgl1	25	61	1.02	0.000818095	0.0619235	25	61	1.02	0.002428	0.138225	11	60699723	60714186	4862	56.03	1	protein_coding	Lethal(2) giant larvae protein homolog 1 [Source:UniProtKB/Swiss-Prot;Acc:Q80Y17]
ENSMUSG00000032231	Anxa2	206.3	444.1	1.02	1.26985e-06	0.000378972	206.3	444.1	0.96	1.33289e-05	0.00290525	9	69453620	69491795	3731	47.34	1	protein_coding	Annexin A2 [Source:UniProtKB/Swiss-Prot;Acc:P07356]
ENSMUSG00000050052	Tdrp	3.9	19.2	1.02	0.00705232	0.299047	3.9	19.2	0.94	0.021136	0.626737	8	13952008	13975032	4695	47.87	-1	protein_coding	testis development related protein [Source:MGI Symbol;Acc:MGI:1919398]
ENSMUSG00000054770	Kctd18	15.5	47	1.02	0.00472629	0.187817	15.5	47	1.12	0.00267587	0.143433	1	57955101	58018956	12973	41.23	-1	protein_coding	potassium channel tetramerization domain containing 18 [Source:HGNC Symbol;Acc:HGNC:26446]
ENSMUSG00000055945	Prr18	5	30.4	1.02	0.00649141	0.291461	5	30.4	1.06	0.00941883	0.309919	17	8340406	8344112	3552	58	1	protein_coding	Proline-rich protein 18 [Source:UniProtKB/Swiss-Prot;Acc:Q6PAN7]
ENSMUSG00000058145	Adamts17	12.1	34.1	1.02	0.00382811	0.220257	12.1	34.1	0.98	0.0105693	0.29297	7	66839735	67153171	7764	45.74	1	protein_coding	a disintegrin-like and metallopeptidase (reprolysin type) with thrombospondin type 1 motif, 17 [Source:MGI Symbol;Acc:MGI:3588195]
ENSMUSG00000037071	Scd1	4.7	39.2	1.01	0.00547241	0.265694	4.7	39.2	1.39	0.000690346	0.0687393	19	44394451	44407709	4836	47.73	-1	protein_coding	stearoyl-Coenzyme A desaturase 1 [Source:MGI Symbol;Acc:MGI:98239]
ENSMUSG00000068631	Gm7676	50.2	130.6	1.01	0.00273949	0.13887	50.2	130.6	0.99	0.00317906	0.162398	8	13896311	13896629	319	53.92	1	processed_pseudogene	predicted gene 7676 [Source:MGI Symbol;Acc:MGI:3644053]
ENSMUSG00000001864	Aif1l	2.5	17.8	1	0.00687368	0.318028	2.5	17.8	0.97	0.0161147	0.542331	2	31950139	31973442	4032	52.11	1	protein_coding	Allograft inflammatory factor 1-like [Source:UniProtKB/Swiss-Prot;Acc:Q9EQX4]
ENSMUSG00000115570	AC123665.3	0.7	9.8	1	0.00539268	1	0.7	9.8	1.14	0.00380643	1	14	47491568	47492783	1216	43.26	1	TEC
ENSMUSG00000020656	Grhl1	5	17.4	0.99	0.00864532	0.368136	5	17.4	0.95	0.0194865	0.601081	12	24572283	24617391	5539	47.78	1	protein_coding	Grainyhead-like [Source:UniProtKB/Swiss-Prot;Acc:Q921D9]
ENSMUSG00000022091	Sorbs3	5.7	19.6	0.99	0.0078359	0.322797	5.7	19.6	1.21	0.00195436	0.205518	14	70180468	70211989	3630	51.25	-1	protein_coding	sorbin and SH3 domain containing 3 [Source:MGI Symbol;Acc:MGI:700013]
ENSMUSG00000028031	Dkk2	1.1	18.8	0.99	0.00482754	0.245344	1.1	18.8	1.07	0.00578824	0.3661	3	132085292	132180304	3705	39.18	1	protein_coding	Dickkopf-related protein 2 [Source:UniProtKB/Swiss-Prot;Acc:Q9QYZ8]
ENSMUSG00000044350	Lacc1	11.8	30.5	0.99	0.00326337	0.200014	11.8	30.5	1.01	0.00642237	0.245195	14	77024200	77036904	3644	41.37	-1	protein_coding	Laccase domain-containing protein 1 [Source:UniProtKB/Swiss-Prot;Acc:Q8BZT9]
ENSMUSG00000062591	Tubb4a	9.4	24.5	0.99	0.00388437	0.186394	9.4	24.5	0.97	0.00995459	0.284989	17	57080066	57087782	2228	51.64	-1	protein_coding	tubulin, beta 4A class IVA [Source:MGI Symbol;Acc:MGI:107848]
ENSMUSG00000082361	Btc	22.5	66.1	0.99	0.00696401	0.271728	22.5	66.1	0.9	0.0118017	0.313198	5	91357261	91402994	4520	40.22	-1	protein_coding	Probetacellulin Betacellulin [Source:UniProtKB/Swiss-Prot;Acc:Q05928]
ENSMUSG00000006143	Upk3bl	0.3	6.7	0.98	0.00496456	1	0.3	6.7	0.95	0.0109338	1	5	136054492	136064326	1303	50.35	1	protein_coding	uroplakin 3B-like [Source:MGI Symbol;Acc:MGI:1916915]
ENSMUSG00000007039	Ddah2	13.8	38.8	0.98	0.00570169	0.277482	13.8	38.8	1.01	0.0086275	0.309919	17	35059035	35062095	1593	57.79	1	protein_coding	N(G),N(G)-dimethylarginine dimethylaminohydrolase 2 [Source:UniProtKB/Swiss-Prot;Acc:Q99LD8]
ENSMUSG00000009376	Met	93.5	205.9	0.98	0.000198245	0.0224605	93.5	205.9	0.97	0.000679956	0.0589339	6	17463800	17573980	7679	41.79	1	protein_coding	MET proto-oncogene, receptor tyrosine kinase [Source:HGNC Symbol;Acc:HGNC:7029]
ENSMUSG00000019942	Cdk1	114.9	269.1	0.98	0.00133578	0.085574	114.9	269.1	0.98	0.00104694	0.0801309	10	69335146	69352938	4934	47.05	-1	protein_coding	Cyclin-dependent kinase 1 [Source:UniProtKB/Swiss-Prot;Acc:P11440]
ENSMUSG00000022790	Igsf11	17.9	46.5	0.98	0.00478344	0.222952	17.9	46.5	0.93	0.0128743	0.357936	16	38892671	39027159	4493	43.45	1	protein_coding	Immunoglobulin superfamily member 11 [Source:UniProtKB/Swiss-Prot;Acc:P0C673]
ENSMUSG00000025921	Rdh10	82.7	206	0.98	0.00304389	0.144756	82.7	206	0.85	0.0135905	0.334947	1	16105774	16133734	4160	43.04	1	protein_coding	Retinol dehydrogenase 10 [Source:UniProtKB/Swiss-Prot;Acc:Q8VCH7]
ENSMUSG00000030107	Usp18	36.3	84.6	0.98	0.00132416	0.0852762	36.3	84.6	0.89	0.00267649	0.151715	6	121245906	121270917	2790	44.8	1	protein_coding	ubiquitin specific peptidase 18 [Source:MGI Symbol;Acc:MGI:1344364]
ENSMUSG00000035164	Zc3h12c	11.3	39.2	0.98	0.00920613	0.266303	11.3	39.2	1.02	0.0111575	0.349363	9	52111344	52168572	6845	39.39	-1	protein_coding	zinc finger CCCH type containing 12C [Source:MGI Symbol;Acc:MGI:3026959]
ENSMUSG00000074445	Sprr2a3	9.6	147.9	0.98	0.00495166	0.188422	9.6	147.9	2.53	5.72292e-11	5.48644e-08	3	92285417	92291405	2883	40.02	1	protein_coding	Small proline-rich protein 2A3 [Source:UniProtKB/Swiss-Prot;Acc:Q4KL71]
ENSMUSG00000024401	Tnf	4.9	33.7	0.97	0.0081361	0.275153	4.9	33.7	0.92	0.0227043	0.425023	17	35199381	35202007	1639	52.3	-1	protein_coding	tumor necrosis factor [Source:MGI Symbol;Acc:MGI:104798]
ENSMUSG00000026258	3110079O15Rik	1.1	8.1	0.97	0.00809883	1	1.1	8.1	0.9	0.0205894	1	1	87470271	87475482	722	53.95	1	protein_coding	Uncharacterized [Source:UniProtKB/Swiss-Prot;Acc:Q9CXL7]
ENSMUSG00000028312	Smc2	175.5	393	0.97	0.000511042	0.0443483	175.5	393	0.97	0.000931222	0.0725212	4	52439243	52488260	5478	37.99	1	protein_coding	Structural maintenance of chromosomes protein 2 [Source:UniProtKB/Swiss-Prot;Acc:Q8CG48]
ENSMUSG00000030346	Rad51ap1	20.3	50.2	0.97	0.00308535	0.148305	20.3	50.2	1	0.00507916	0.232479	6	126923050	126939587	4813	43.95	-1	protein_coding	RAD51-associated protein 1 isoform 2 [Source:RefSeq peptide;Acc:NP_001334384]
ENSMUSG00000031074	Fgf3	0.3	12.9	0.97	0.00421226	0.30232	0.3	12.9	1.11	0.00351262	0.522315	7	144838083	144844436	2326	56.81	1	protein_coding	fibroblast growth factor 3 [Source:HGNC Symbol;Acc:HGNC:3681]
ENSMUSG00000031667	Aktip	56.2	125.5	0.97	0.000605871	0.0500908	56.2	125.5	0.97	0.0016605	0.102962	8	91111784	91199976	7040	46.76	-1	protein_coding	Mus musculus thymoma viral proto-onco 1 interacting protein (Aktip), transcript variant 6, mRNA. [Source:RefSeq mRNA;Acc:NM_001358934]
ENSMUSG00000075268	Gm10819	2.9	11.3	0.97	0.010234	0.789424	2.9	11.3	0.94	0.0217498	0.881426	19	16267061	16267621	561	60.78	-1	processed_pseudogene	predicted gene 10819 [Source:MGI Symbol;Acc:MGI:3642135]
ENSMUSG00000018340	Anxa6	45.1	102.2	0.96	0.00111195	0.0751258	45.1	102.2	0.96	0.00254739	0.132835	11	54979108	55033445	2930	48.81	-1	protein_coding	Annexin A6 [Source:UniProtKB/Swiss-Prot;Acc:P14824]
ENSMUSG00000020649	Rrm2	67.3	180.3	0.96	0.00682173	0.22744	67.3	180.3	1.03	0.00451062	0.184079	12	24708241	24714146	2771	46.99	1	protein_coding	Ribonucleoside-diphosphate reductase subunit M2 [Source:UniProtKB/Swiss-Prot;Acc:P11157]
ENSMUSG00000028331	Trmo	9.8	28.8	0.96	0.00860471	0.282145	9.8	28.8	1.05	0.00726398	0.242299	4	46376505	46389437	2271	44.42	-1	protein_coding	Mus musculus tRNA methyltransferase O (Trmo), transcript variant 2, mRNA. [Source:RefSeq mRNA;Acc:NM_001347095]
ENSMUSG00000028573	Fggy	28.7	62.8	0.96	0.00035406	0.0355105	28.7	62.8	0.93	0.0021571	0.133482	4	95557507	95926939	5844	41.46	1	protein_coding	FGGY carbohydrate kinase domain-containing protein [Source:UniProtKB/Swiss-Prot;Acc:A2AJL3]
ENSMUSG00000032053	Pou2af1	1.1	20.8	0.96	0.00577868	0.298426	1.1	20.8	1.17	0.00258601	0.237477	9	51213708	51240080	2549	42.7	1	protein_coding	POU domain, class 2, associating factor 1 [Source:MGI Symbol;Acc:MGI:105086]
ENSMUSG00000035901	Dennd5a	29.3	69	0.96	0.00206295	0.114518	29.3	69	1.05	0.00145712	0.0984499	7	109893780	109960470	8677	43.99	-1	protein_coding	DENN domain-containing protein 5A [Source:UniProtKB/Swiss-Prot;Acc:Q6PAL8]
ENSMUSG00000090031	4732440D04Rik	5.2	32.7	0.96	0.00935856	0.295538	5.2	32.7	1.24	0.0024873	0.146772	1	6209866	6215293	5428	43.55	-1	antisense	RIKEN cDNA 4732440D04 gene [Source:MGI Symbol;Acc:MGI:3604103]
ENSMUSG00000115602	AC132863.1	15.1	37.1	0.96	0.00384174	0.196857	15.1	37.1	0.94	0.010061	0.319003	15	73407489	73408239	751	48.47	-1	processed_pseudogene
ENSMUSG00000003779	Kif20a	4.3	21.3	0.95	0.0113539	0.410311	4.3	21.3	1.03	0.0117863	0.48511	18	34624624	34633265	3796	46.89	1	protein_coding	Kinesin-like protein KIF20A [Source:UniProtKB/Swiss-Prot;Acc:P97329]
ENSMUSG00000004473	Clec11a	0.8	7.7	0.95	0.00860401	1	0.8	7.7	0.94	0.0147248	1	7	44302687	44306902	2978	53.84	-1	protein_coding	C-type lectin domain family 11 member A [Source:UniProtKB/Swiss-Prot;Acc:O88200]
ENSMUSG00000023034	Nr4a1	133.9	305.7	0.95	0.00190002	0.110289	133.9	305.7	1.05	0.000695179	0.0602338	15	101254269	101274795	3509	54.5	1	protein_coding	nuclear receptor subfamily 4, group A, member 1 [Source:MGI Symbol;Acc:MGI:1352454]
ENSMUSG00000034684	Sema3f	7.3	20.1	0.95	0.00742119	0.311216	7.3	20.1	0.99	0.0101201	0.46543	9	107681500	107710475	5197	56.02	-1	protein_coding	Semaphorin-3F [Source:UniProtKB/Swiss-Prot;Acc:O88632]
ENSMUSG00000048058	Ldlrad3	14.6	38.7	0.95	0.00737803	0.277482	14.6	38.7	0.82	0.0304432	0.50964	2	101950203	102186385	6023	46.84	-1	protein_coding	low density lipoprotein receptor class A domain containing 3 [Source:MGI Symbol;Acc:MGI:2138856]
ENSMUSG00000053477	Tcf4	378.3	768.6	0.95	6.05173e-07	0.000189869	378.3	768.6	0.87	9.20643e-07	0.000258466	18	69343356	69689079	27382	42.24	1	protein_coding	transcription factor 4 [Source:MGI Symbol;Acc:MGI:98506]
ENSMUSG00000058385	Hist1h2bg	14.4	34.9	0.95	0.00497207	0.228019	14.4	34.9	0.89	0.015383	0.35496	13	23571396	23572013	618	53.72	1	protein_coding	Histone H2B type 1-C/E/G [Source:UniProtKB/Swiss-Prot;Acc:Q6ZWY9]
ENSMUSG00000075302	Erich2	8	22.5	0.95	0.00816683	0.34006	8	22.5	1	0.00951821	0.27797	2	70508819	70540884	2948	42.03	1	protein_coding
ENSMUSG00000110290	Gm45336	16.8	62.5	0.95	0.0122806	0.363973	16.8	62.5	1.02	0.0125272	0.342423	8	92465767	92469665	3230	49.5	1	lincRNA	predicted gene 45336 [Source:MGI Symbol;Acc:MGI:5791172]
ENSMUSG00000015243	Abca1	31.7	81.7	0.94	0.0076277	0.242508	31.7	81.7	0.86	0.0163198	0.362291	4	53030787	53159895	10363	44.25	-1	protein_coding	ATP-binding cassette, sub-family A (ABC1), member 1 [Source:MGI Symbol;Acc:MGI:99607]
ENSMUSG00000026147	Col9a1	2.6	16.6	0.94	0.0110403	0.376115	2.6	16.6	0.94	0.0180254	0.567037	1	24177610	24252684	5068	40.87	1	protein_coding	collagen type IX alpha 1 chain [Source:HGNC Symbol;Acc:HGNC:2217]
ENSMUSG00000029359	Tesc	22.9	53.2	0.94	0.00326545	0.14878	22.9	53.2	0.98	0.00500817	0.205518	5	118027743	118061878	1591	52.87	1	protein_coding	tescalcin [Source:MGI Symbol;Acc:MGI:1930803]
ENSMUSG00000029380	Cxcl1	6.6	45.5	0.94	0.00988088	0.275153	6.6	45.5	1.02	0.0112868	0.307006	5	90891241	90893115	1875	44.64	1	protein_coding	Growth-regulated alpha protein KC(5-72) [Source:UniProtKB/Swiss-Prot;Acc:P12850]
ENSMUSG00000032440	Tgfbr2	39.7	91.6	0.94	0.0029125	0.143855	39.7	91.6	0.91	0.0075825	0.247628	9	116084293	116175360	8187	46.79	-1	protein_coding	transforming growth factor, beta receptor II [Source:MGI Symbol;Acc:MGI:98729]
ENSMUSG00000033033	Calhm2	9.6	29.4	0.94	0.0106502	0.366391	9.6	29.4	1.13	0.00312534	0.166788	19	47105353	47138294	4361	48.95	-1	protein_coding	Calcium homeostasis modulator protein 2 [Source:UniProtKB/Swiss-Prot;Acc:Q8VEC4]
ENSMUSG00000036186	Fam69b	1.9	13.6	0.94	0.0102538	0.789424	1.9	13.6	0.99	0.012591	0.498731	2	26628457	26636497	2476	56.01	1	protein_coding	Protein FAM69B [Source:UniProtKB/Swiss-Prot;Acc:Q99ML4]
ENSMUSG00000037363	Letm2	14.4	39	0.94	0.0088526	0.352599	14.4	39	1.17	0.00102259	0.0891748	8	25578490	25597582	7238	44.05	-1	protein_coding	LETM1 domain-containing protein LETM2, mitochondrial [Source:UniProtKB/Swiss-Prot;Acc:Q7TNU7]
ENSMUSG00000037846	Rtkn2	4.7	16.1	0.94	0.0128872	0.735086	4.7	16.1	0.98	0.016408	0.552936	10	67979570	68059740	5547	44.44	1	protein_coding	Mus musculus rhotekin 2 (Rtkn2), transcript variant 1, mRNA. [Source:RefSeq mRNA;Acc:NM_001359318]
ENSMUSG00000051977	Prdm9	11.6	33.4	0.94	0.00991825	0.353686	11.6	33.4	1.1	0.00372979	0.182303	17	15543079	15564354	4308	40.93	-1	protein_coding	PR domain containing 9 [Source:MGI Symbol;Acc:MGI:2384854]
ENSMUSG00000020650	Bcap29	109	226.2	0.93	0.000156269	0.0189317	109	226.2	0.89	0.000855526	0.0674827	12	31590967	31634658	7590	40.26	-1	protein_coding	B-cell receptor-associated protein 29 [Source:UniProtKB/Swiss-Prot;Acc:Q61334]
ENSMUSG00000021391	Cenpp	21.7	51.6	0.93	0.0042875	0.175896	21.7	51.6	0.92	0.00957531	0.298751	13	49464023	49652785	2564	38.93	-1	protein_coding	Centromere protein P [Source:UniProtKB/Swiss-Prot;Acc:Q9CZ92]
ENSMUSG00000026726	Cubn	4.2	21.2	0.93	0.0128782	0.430554	4.2	21.2	1.03	0.0115599	0.480468	2	13276338	13491813	14935	39.85	-1	protein_coding	Cubilin [Source:UniProtKB/Swiss-Prot;Acc:Q9JLB4]
ENSMUSG00000029369	Afm	2.7	10.6	0.93	0.0136793	0.509963	2.7	10.6	0.9	0.0277242	0.673046	5	90518932	90553543	3038	41.43	1	protein_coding	Afamin [Source:UniProtKB/Swiss-Prot;Acc:O89020]
ENSMUSG00000033227	Wnt6	0.5	14.8	0.93	0.00620508	0.382168	0.5	14.8	1.02	0.00676844	0.386404	1	74771892	74785322	2192	53.1	1	protein_coding	wingless-type MMTV integration site family, member 6 [Source:MGI Symbol;Acc:MGI:98960]
ENSMUSG00000043252	Tmem64	26.8	59.5	0.93	0.00215387	0.11598	26.8	59.5	0.88	0.00740289	0.237477	4	15265831	15286753	4670	40.84	1	protein_coding	Transmembrane protein 64 [Source:UniProtKB/Swiss-Prot;Acc:Q3U145]
ENSMUSG00000044229	Nxpe4	1.1	32.4	0.93	#N/A	#N/A	1.1	32.4	1.49	0.000190146	0.0249903	9	48162023	48400025	5911	43.96	1	protein_coding	NXPE family member 4 [Source:UniProtKB/Swiss-Prot;Acc:Q52KP5]
ENSMUSG00000044927	H1fx	9.8	26.6	0.93	0.0103992	0.371044	9.8	26.6	0.88	0.0208381	0.418205	6	87980421	87981637	1217	71.32	-1	protein_coding	H1 histone family member X [Source:HGNC Symbol;Acc:HGNC:4722]
ENSMUSG00000048832	Vps37c	25.5	72.6	0.93	0.0105429	0.282145	25.5	72.6	1.07	0.00487968	0.191297	19	10688815	10714419	2415	49.76	1	protein_coding	vacuolar protein sorting 37C [Source:MGI Symbol;Acc:MGI:2147661]
ENSMUSG00000050106	Tmc8	3.7	12.9	0.93	0.0144112	0.530086	3.7	12.9	0.94	0.0213033	0.628226	11	117782076	117793110	3056	54.05	1	protein_coding	Transmembrane channel-like protein 8 [Source:UniProtKB/Swiss-Prot;Acc:Q7TN58]
ENSMUSG00000058799	Nap1l1	289.6	622.9	0.93	0.000840822	0.0619235	289.6	622.9	0.8	0.00290532	0.146888	10	111473223	111498150	4994	41.32	1	protein_coding	Nucleosome assembly protein 1-like 1 [Source:UniProtKB/Swiss-Prot;Acc:P28656]
ENSMUSG00000059493	Nhs	14.3	46.6	0.93	0.0132499	0.402168	14.3	46.6	0.88	0.0291948	0.499551	X	161833296	162159730	8805	40.85	-1	protein_coding	NHS actin remodeling regulator [Source:HGNC Symbol;Acc:HGNC:7820]
ENSMUSG00000060550	H2-Q7	17.9	53.1	0.93	0.0126857	0.36891	17.9	53.1	0.73	0.0617428	0.642264	17	35439155	35443773	4265	53.73	1	protein_coding	Mus musculus histocompatibility 2, Q region locus 9 (H2-Q9), mRNA. [Source:RefSeq mRNA;Acc:NM_001201460]
ENSMUSG00000106383	E330034L11Rik	4.5	16.4	0.93	0.0140737	0.447447	4.5	16.4	1.09	0.00707464	0.396475	3	95639304	95641045	1742	46.79	1	TEC	RIKEN cDNA E330034L11 gene [Source:MGI Symbol;Acc:MGI:3026962]
ENSMUSG00000109899	Gm6012	7.9	30.9	0.93	0.0141005	0.412928	7.9	30.9	1.3	0.000849828	0.0716587	8	57520157	57520886	730	43.42	-1	processed_pseudogene	predicted gene 6012 [Source:MGI Symbol;Acc:MGI:3644785]
ENSMUSG00000020641	Rsad2	14.3	52.8	0.92	0.015042	0.345625	14.3	52.8	0.99	0.0155576	0.355724	12	26442746	26456452	4335	43.51	-1	protein_coding	Radical S-adenosyl methionine domain-containing protein 2 [Source:UniProtKB/Swiss-Prot;Acc:Q8CBB9]
ENSMUSG00000034528	Hsd17b13	17	55.2	0.92	0.0153494	0.423212	17	55.2	0.9	0.0252419	0.492613	5	103955440	103977410	2157	42.95	-1	protein_coding	hydroxysteroid (17-beta) dehydrogenase 13 [Source:MGI Symbol;Acc:MGI:2140804]
ENSMUSG00000052533	Nup188	31.6	72	0.92	0.00315811	0.148305	31.6	72	1.16	4.65171e-05	0.00755931	2	30286397	30344266	6241	46.35	1	protein_coding	Nucleoporin NUP188 homolog [Source:UniProtKB/Swiss-Prot;Acc:Q6ZQH8]
ENSMUSG00000107168	Gm42507	6.6	27.1	0.92	0.0149863	0.423362	6.6	27.1	1.17	0.0036799	0.173622	5	36618701	36621255	2555	42.07	1	TEC	predicted gene 42507 [Source:MGI Symbol;Acc:MGI:5662644]
ENSMUSG00000115837	AC144772.3	22.7	74.9	0.92	0.0150062	0.345434	22.7	74.9	1.02	0.0100929	0.293727	15	35787154	35790279	3126	42.13	1	TEC
ENSMUSG00000021714	Cenpk	57.7	126.9	0.91	0.00236649	0.122697	57.7	126.9	0.88	0.00662599	0.224801	13	104228611	104252392	5231	34.26	1	protein_coding	Centromere protein K [Source:UniProtKB/Swiss-Prot;Acc:Q9ESN5]
ENSMUSG00000022322	Shcbp1	37.3	92.1	0.91	0.00939926	0.268653	37.3	92.1	0.87	0.0137474	0.343733	8	4735976	4779567	6295	38.72	-1	protein_coding	SHC SH2 domain-binding protein 1 [Source:UniProtKB/Swiss-Prot;Acc:Q9Z179]
ENSMUSG00000026628	Atf3	350.7	782.8	0.91	0.00312565	0.147666	350.7	782.8	1.01	0.00143019	0.0933449	1	191170296	191218039	2154	46.24	-1	protein_coding	Cyclic AMP-dependent transcription factor ATF-3 [Source:UniProtKB/Swiss-Prot;Acc:Q60765]
ENSMUSG00000027397	Slc20a1	38.4	90.9	0.91	0.00666889	0.222952	38.4	90.9	0.95	0.0076982	0.242695	2	129198764	129211616	5580	45.49	1	protein_coding	Sodium-dependent phosphate transporter 1 [Source:UniProtKB/Swiss-Prot;Acc:Q61609]
ENSMUSG00000028357	Kif12	23.1	52.2	0.91	0.00412168	0.172126	23.1	52.2	0.91	0.0084497	0.247628	4	63165630	63172131	3402	54.86	-1	protein_coding	Kinesin-like protein KIF12 [Source:UniProtKB/Swiss-Prot;Acc:Q9D2Z8]
ENSMUSG00000072980	Oip5	19.3	70.1	0.91	0.0159533	0.404918	19.3	70.1	1	0.0142161	0.350615	2	119609512	119618469	1778	40.66	-1	protein_coding	Protein Mis18-beta [Source:UniProtKB/Swiss-Prot;Acc:A2AQ14]
ENSMUSG00000074259	Gramd2	6.5	19.4	0.91	0.0139172	0.446232	6.5	19.4	0.98	0.0147451	0.531787	9	59680144	59718874	6138	48.18	1	protein_coding	Mus musculus GRAM domain containing 2 (Gramd2), transcript variant 1, mRNA. [Source:RefSeq mRNA;Acc:NM_001357686]
ENSMUSG00000109771	Gm35315	14.5	35	0.91	0.00838523	0.251836	14.5	35	0.93	0.0125909	0.367123	5	110076136	110094420	3693	40.53	-1	protein_coding
ENSMUSG00000023906	Cldn6	0.9	15.4	0.9	0.00828794	0.743379	0.9	15.4	1.41	0.00049895	0.208263	17	23679365	23682446	1506	53.5	1	protein_coding	Claudin-6 [Source:UniProtKB/Swiss-Prot;Acc:Q9Z262]
ENSMUSG00000027985	Lef1	54.9	117.4	0.9	0.00216112	0.11598	54.9	117.4	0.87	0.00361234	0.165302	3	131110471	131224356	8788	46.22	1	protein_coding	Lymphoid enhancer-binding factor 1 [Source:UniProtKB/Swiss-Prot;Acc:P27782]
ENSMUSG00000029798	Herc6	14.7	42.7	0.9	0.0150452	0.396212	14.7	42.7	1	0.0116438	0.355618	6	57581000	57664632	9292	38.82	1	protein_coding	E3 ISG15--protein ligase Herc6 [Source:UniProtKB/Swiss-Prot;Acc:F2Z461]
ENSMUSG00000039748	Exo1	19	47.9	0.9	0.0115154	0.39504	19	47.9	1.02	0.00534002	0.205518	1	175880581	175913489	8422	44.46	1	protein_coding	Exonuclease 1 [Source:UniProtKB/Swiss-Prot;Acc:Q9QZ11]
ENSMUSG00000042901	Aida	52.7	107.2	0.9	0.000140731	0.0172199	52.7	107.2	0.96	0.000206877	0.0264861	1	183296590	183325476	6175	42.18	1	protein_coding	Axin interactor, dorsalization-associated protein [Source:UniProtKB/Swiss-Prot;Acc:Q8C4Q6]
ENSMUSG00000056131	Pgm3	43.2	124	0.9	0.0148968	0.34006	43.2	124	0.98	0.0114977	0.316804	9	86554377	86571842	4487	43.58	-1	protein_coding	phosphoglucomutase 3 [Source:MGI Symbol;Acc:MGI:97566]
ENSMUSG00000024477	Pggt1b	50.2	116.2	0.89	0.00690586	0.228019	50.2	116.2	0.93	0.00837091	0.251781	18	46239949	46280850	2736	41.48	-1	protein_coding	Geranylgeranyl transferase type-1 subunit beta [Source:UniProtKB/Swiss-Prot;Acc:Q8BUY9]
ENSMUSG00000026343	Gpr39	5	17.5	0.89	0.0194099	0.812382	5	17.5	1.01	0.0132626	0.516255	1	125676995	125873862	3015	44.23	1	protein_coding	G protein-coupled receptor 39 [Source:HGNC Symbol;Acc:HGNC:4496]
ENSMUSG00000028967	Errfi1	94.2	190.6	0.89	0.000325458	0.0343116	94.2	190.6	0.87	0.00139206	0.0971313	4	150853919	150868892	3582	43.8	1	protein_coding	Mus musculus ERBB receptor feedback inhibitor 1 (Errfi1), transcript variant 1, mRNA. [Source:RefSeq mRNA;Acc:NM_001356323]
ENSMUSG00000046341	Gm11223	85.5	174	0.89	0.000574708	0.0481652	85.5	174	0.82	0.00273826	0.143751	4	69925630	69926079	450	53.56	-1	processed_pseudogene	predicted gene 11223 [Source:MGI Symbol;Acc:MGI:3651631]
ENSMUSG00000053080	2700081O15Rik	18.3	43.7	0.89	0.00998114	0.275153	18.3	43.7	0.95	0.0107269	0.332364	19	7417625	7425904	7032	57.98	1	protein_coding	Uncharacterized [Source:UniProtKB/Swiss-Prot;Acc:Q4VA45]
ENSMUSG00000089762	Ier5l	10.8	25.7	0.89	0.00945696	0.349621	10.8	25.7	0.86	0.0227461	0.425023	2	30471537	30474219	2683	63.85	-1	protein_coding	Immediate early response 5-like protein [Source:UniProtKB/Swiss-Prot;Acc:Q99J55]
ENSMUSG00000103272	Gm37914	3.8	12.1	0.89	0.0186279	0.889123	3.8	12.1	0.87	0.03377	0.689762	1	86120883	86123561	2679	39.01	1	TEC	predicted gene, 37914 [Source:MGI Symbol;Acc:MGI:5611142]
ENSMUSG00000105987	AI506816	31.3	65.9	0.89	0.00137802	0.108534	31.3	65.9	0.89	0.00386353	0.184079	5	23698296	23712667	4479	50.05	-1	processed_transcript	expressed sequence AI506816 [Source:MGI Symbol;Acc:MGI:2140929]
ENSMUSG00000113137	AC157515.1	23.9	51.9	0.89	0.00261402	0.158823	23.9	51.9	0.92	0.00484052	0.191297	12	55067752	55068201	450	48.22	-1	processed_pseudogene
ENSMUSG00000002814	Top3a	9.7	23.4	0.88	0.0118711	0.390398	9.7	23.4	0.84	0.0263755	0.481595	11	60740058	60777365	4599	45.35	-1	protein_coding	topoisomerase (DNA) III alpha [Source:MGI Symbol;Acc:MGI:1197527]
ENSMUSG00000015126	Tsr3	7.7	21.2	0.88	0.0183808	0.489629	7.7	21.2	1.01	0.0108236	0.471341	17	25240170	25242798	1192	54.89	1	protein_coding	Ribosome biosis [Source:UniProtKB/Swiss-Prot;Acc:Q5HZH2]
ENSMUSG00000016382	Pls3	116.6	262.3	0.88	0.00714543	0.231914	116.6	262.3	0.82	0.014436	0.338182	X	75785654	75875182	4238	39.96	-1	protein_coding	Mus musculus plastin 3 (T-isoform) (Pls3), transcript variant 4, mRNA. [Source:RefSeq mRNA;Acc:NM_001346519]
ENSMUSG00000020728	Cep112	19.8	49.5	0.88	0.0132858	0.321276	19.8	49.5	0.86	0.0261409	0.471341	11	108425192	108860615	6175	40.25	1	protein_coding	Centrosomal protein of 112 kDa [Source:UniProtKB/Swiss-Prot;Acc:Q5PR68]
ENSMUSG00000022528	Hes1	471.4	1021	0.88	0.00474625	0.186394	471.4	1021	0.86	0.00801967	0.239425	16	30064384	30067796	2037	52.92	1	protein_coding	Transcription factor HES-1 [Source:UniProtKB/Swiss-Prot;Acc:P35428]
ENSMUSG00000025203	Scd2	188.5	645.5	0.88	0.019796	0.39504	188.5	645.5	1.1	0.00254716	0.131321	19	44293676	44306864	5453	49.12	1	protein_coding	stearoyl-Coenzyme A desaturase 2 [Source:MGI Symbol;Acc:MGI:98240]
ENSMUSG00000026604	Ptpn14	10.1	26.4	0.88	0.0161865	0.385234	10.1	26.4	0.85	0.031281	0.477416	1	189728268	189876695	13413	48.69	1	protein_coding	Tyrosine-protein phosphatase non-receptor type 14 [Source:UniProtKB/Swiss-Prot;Acc:Q62130]
ENSMUSG00000037868	Egr2	31.1	76.6	0.88	0.0140246	0.382168	31.1	76.6	0.83	0.0229314	0.439394	10	67535475	67542188	3398	55.81	1	protein_coding	E3 SUMO-protein ligase EGR2 [Source:UniProtKB/Swiss-Prot;Acc:P08152]
ENSMUSG00000043439	Epop	2.2	12.3	0.88	0.0169942	0.569504	2.2	12.3	0.89	0.025264	0.655575	11	97627389	97629702	2314	66.9	-1	protein_coding	Elongin BC and Polycomb repressive complex 2-associated protein [Source:UniProtKB/Swiss-Prot;Acc:Q7TNS8]
ENSMUSG00000068748	Ptprz1	2.5	20.8	0.88	0.0135203	0.438501	2.5	20.8	0.94	0.0159974	0.546706	6	22875502	23052916	14245	38.62	1	protein_coding	protein tyrosine phosphatase, receptor type Z, polypeptide 1 [Source:MGI Symbol;Acc:MGI:97816]
ENSMUSG00000023905	Tnfrsf12a	29.4	63	0.87	0.00461318	0.220257	29.4	63	0.81	0.0144598	0.338943	17	23675447	23677449	963	57.46	-1	protein_coding	Tumor necrosis factor receptor superfamily member 12A [Source:UniProtKB/Swiss-Prot;Acc:Q9CR75]
ENSMUSG00000028559	Osbpl9	65.7	140.7	0.87	0.00470302	0.185633	65.7	140.7	0.95	0.00219224	0.11874	4	109061145	109202272	7006	42.44	-1	protein_coding	Oxysterol-binding protein-related protein 9 [Source:UniProtKB/Swiss-Prot;Acc:A2A8Z1]
ENSMUSG00000029865	Sval1	11.3	33.6	0.87	0.0200914	0.496239	11.3	33.6	0.77	0.0566841	0.654555	6	41951630	41956098	615	35.91	1	protein_coding	seminal vesicle antigen-like 1 [Source:MGI Symbol;Acc:MGI:1918828]
ENSMUSG00000031295	Phka2	26	61	0.87	0.0103993	0.279048	26	61	0.99	0.00353294	0.176662	X	160502166	160598878	6068	41.79	1	protein_coding	Phosphorylase b kinase regulatory subunit alpha, liver isoform [Source:UniProtKB/Swiss-Prot;Acc:Q8BWJ3]
ENSMUSG00000032180	Tmed1	12.9	32.5	0.87	0.0138001	0.40715	12.9	32.5	0.9	0.0185576	0.385006	9	21507553	21510252	1519	54.67	-1	protein_coding	transmembrane p24 trafficking protein 1 [Source:MGI Symbol;Acc:MGI:106201]
ENSMUSG00000032849	Abcc4	56.6	121.7	0.87	0.00547604	0.200014	56.6	121.7	0.69	0.0174323	0.362291	14	118482692	118706219	6389	46.56	-1	protein_coding	ATP-binding cassette, sub-family C (CFTR/MRP), member 4 [Source:MGI Symbol;Acc:MGI:2443111]
ENSMUSG00000034538	Zfp418	6.1	16.2	0.87	0.0175267	0.459749	6.1	16.2	0.87	0.0296973	0.664263	7	7171330	7183562	5347	41.76	1	protein_coding	zinc finger protein 418 [Source:MGI Symbol;Acc:MGI:2444763]
ENSMUSG00000041238	Rbbp8	78.8	156.6	0.87	0.000477668	0.0428045	78.8	156.6	0.86	0.00178788	0.104121	18	11633276	11743207	3867	38.68	1	protein_coding	retinoblastoma binding protein 8, endonuclease [Source:MGI Symbol;Acc:MGI:2442995]
ENSMUSG00000051065	Mb21d2	12.2	29.4	0.87	0.0121627	0.34006	12.2	29.4	0.89	0.0187337	0.448424	16	28826176	28929698	3080	46.97	-1	protein_coding	Mab-21 domain containing 2 [Source:HGNC Symbol;Acc:HGNC:30438]
ENSMUSG00000056856	Jakmip3	0.5	11.4	0.87	0.0096262	0.774798	0.5	11.4	0.91	0.0140598	0.499551	7	138940730	139083976	5111	48.52	1	protein_coding	Janus kinase and microtubule-interacting protein 3 [Source:UniProtKB/Swiss-Prot;Acc:Q5DTN8]
ENSMUSG00000068923	Syt11	33.6	84.9	0.87	0.0164509	0.362082	33.6	84.9	0.85	0.025404	0.463535	3	88744700	88775164	5205	46.7	-1	protein_coding	Synaptotagmin-11 [Source:UniProtKB/Swiss-Prot;Acc:Q9R0N3]
ENSMUSG00000069011	Gm10254	11.1	29.7	0.87	0.0186112	0.479504	11.1	29.7	1.07	0.00475912	0.224801	3	54810384	54811250	867	49.94	-1	processed_pseudogene	predicted gene 10254 [Source:MGI Symbol;Acc:MGI:3708673]
ENSMUSG00000087497	2810001G20Rik	15.6	37.1	0.87	0.0109765	0.293618	15.6	37.1	1.02	0.00420266	0.209869	11	64079484	64083259	1057	42.85	1	antisense	RIKEN cDNA 2810001G20 gene [Source:MGI Symbol;Acc:MGI:1913706]
ENSMUSG00000015709	Arnt2	11.4	43.7	0.86	0.0224554	0.40715	11.4	43.7	1.04	0.0110513	0.310719	7	84246278	84410176	7689	45.46	-1	protein_coding	Aryl hydrocarbon receptor nuclear translocator 2 [Source:UniProtKB/Swiss-Prot;Acc:Q61324]
ENSMUSG00000019838	Slc16a10	44.1	86	0.86	0.000505383	0.0446503	44.1	86	0.82	0.00319649	0.162398	10	40033532	40142258	7356	43.03	-1	protein_coding	solute carrier family 16 (monocarboxylic acid transporters), member 10 [Source:MGI Symbol;Acc:MGI:1919722]
ENSMUSG00000021680	Crhbp	1	19.7	0.86	0.0104652	0.397712	1	19.7	0.9	0.0155805	0.550666	13	95431371	95444924	1800	43.81	-1	protein_coding	Corticotropin-releasing factor-binding protein [Source:UniProtKB/Swiss-Prot;Acc:Q60571]
ENSMUSG00000028184	Adgrl2	77.9	166.9	0.86	0.00649179	0.222952	77.9	166.9	0.9	0.00694044	0.22771	3	148815583	148990555	14198	41.45	-1	protein_coding	Adhesion G protein-coupled receptor L2 [Source:UniProtKB/Swiss-Prot;Acc:Q8JZZ7]
ENSMUSG00000028214	Gem	5.4	21.6	0.86	0.0227792	0.509963	5.4	21.6	0.77	0.0597169	0.816423	4	11704457	11714752	2104	45.46	1	protein_coding	GTP-binding protein GEM [Source:UniProtKB/Swiss-Prot;Acc:P55041]
ENSMUSG00000032554	Trf	4.1	12.5	0.86	0.0216747	0.632143	4.1	12.5	0.85	0.0379602	0.965189	9	103204001	103230444	3320	47.08	-1	protein_coding	Serotransferrin [Source:UniProtKB/Swiss-Prot;Acc:Q921I1]
ENSMUSG00000035683	Melk	46	119	0.86	0.0181921	0.374746	46	119	0.9	0.0203733	0.415212	4	44300876	44364675	2972	43.61	1	protein_coding	Maternal embryonic leucine zipper kinase [Source:UniProtKB/Swiss-Prot;Acc:Q61846]
ENSMUSG00000036223	Ska1	18.3	49.7	0.86	0.0213662	0.50958	18.3	49.7	0.89	0.0260535	0.498731	18	74195299	74207818	2669	45.82	-1	protein_coding	spindle and kinetochore associated complex subunit 1 [Source:MGI Symbol;Acc:MGI:1913718]
ENSMUSG00000038740	Mvb12b	16.6	42.9	0.86	0.0181099	0.456833	16.6	42.9	0.94	0.0150731	0.350903	2	33729953	33887946	8741	49.42	-1	protein_coding	Multivesicular body subunit 12B [Source:UniProtKB/Swiss-Prot;Acc:Q6KAU4]
ENSMUSG00000039384	Dusp10	9.7	34.2	0.86	0.0232186	0.530086	9.7	34.2	0.85	0.0369203	0.552197	1	184013302	184075636	3042	46.16	1	protein_coding	Dual specificity protein phosphatase 10 [Source:UniProtKB/Swiss-Prot;Acc:Q9ESS0]
ENSMUSG00000058290	Espl1	13	35.8	0.86	0.0195929	0.438501	13	35.8	0.86	0.0320521	0.481458	15	102296266	102324357	8749	48.57	1	protein_coding	Mus musculus extra spindle pole bodies 1, separase (Espl1), transcript variant 2, mRNA. [Source:RefSeq mRNA;Acc:NM_001356312]
ENSMUSG00000063531	Sema3e	0.8	22	0.86	0.00916843	0.348683	0.8	22	1.44	0.000360222	0.0777103	5	14025276	14256689	9285	37.15	1	protein_coding	sema domain, immunoglobulin domain (Ig), short basic domain, secreted, (semaphorin) 3E [Source:MGI Symbol;Acc:MGI:1340034]
ENSMUSG00000069910	Spdl1	18.5	57.2	0.86	0.0227864	0.410008	18.5	57.2	1.03	0.0103529	0.299017	11	34809190	34833641	3460	42.61	-1	protein_coding	Protein Spindly [Source:UniProtKB/Swiss-Prot;Acc:Q923A2]
ENSMUSG00000072437	Nanos1	15	50	0.86	0.0238256	0.414694	15	50	0.76	0.0590965	0.64724	19	60755987	60759913	3927	49.61	1	protein_coding	Nanos homolog 1 [Source:UniProtKB/Swiss-Prot;Acc:Q80WY3]
ENSMUSG00000075033	Nxpe3	5.8	22.3	0.86	0.022859	0.537905	5.8	22.3	0.88	0.0312887	0.672526	16	55839953	55895279	6430	42.85	-1	protein_coding	neurexophilin and PC-esterase domain family member 3 [Source:HGNC Symbol;Acc:HGNC:28238]
ENSMUSG00000096361	Gm5814	2.9	10.5	0.86	0.0236725	0.650216	2.9	10.5	0.91	0.0260344	0.916797	17	47410363	47410740	378	69.31	1	protein_coding
ENSMUSG00000016763	Scube1	5.1	18.6	0.85	0.0246953	0.527412	5.1	18.6	0.86	0.0354852	0.697627	15	83604999	83725021	9829	52.03	-1	protein_coding	signal peptide, CUB domain, EGF-like 1 [Source:MGI Symbol;Acc:MGI:1890616]
ENSMUSG00000020062	Slc5a8	10.9	28.1	0.85	0.020494	0.484131	10.9	28.1	0.88	0.0263876	0.461279	10	88885992	88929515	5331	39.62	1	protein_coding	Sodium-coupled monocarboxylate transporter 1 [Source:UniProtKB/Swiss-Prot;Acc:Q8BYF6]
ENSMUSG00000021712	Trim23	38.5	77.5	0.85	0.00196654	0.109875	38.5	77.5	0.82	0.0068464	0.237477	13	104178797	104203372	5747	36.67	1	protein_coding	E3 ubiquitin-protein ligase TRIM23 [Source:UniProtKB/Swiss-Prot;Acc:Q8BGX0]
ENSMUSG00000024352	Spata24	14	37	0.85	0.0218144	0.403541	14	37	0.9	0.0227002	0.46543	18	35656690	35662186	967	49.68	-1	protein_coding	Spermatosis-associated protein 24 [Source:UniProtKB/Swiss-Prot;Acc:Q6P926]
ENSMUSG00000025492	Ifitm3	1578.7	3156.5	0.85	0.00174382	0.101606	1578.7	3156.5	0.73	0.000857391	0.0674387	7	141009586	141010770	678	51.14	-1	protein_coding	Interferon-induced transmembrane protein 3 [Source:UniProtKB/Swiss-Prot;Acc:Q9CQW9]
ENSMUSG00000027323	Rad51	37.3	83.4	0.85	0.0100636	0.277482	37.3	83.4	0.86	0.0155238	0.355724	2	119112793	119147445	6649	43.41	1	protein_coding	DNA repair 1 [Source:UniProtKB/Swiss-Prot;Acc:Q08297]
ENSMUSG00000027752	Exosc8	84.8	184.4	0.85	0.00950904	0.27299	84.8	184.4	0.89	0.00950572	0.275246	3	54728678	54735393	4333	46.1	-1	protein_coding	Exosome complex component RRP43 [Source:UniProtKB/Swiss-Prot;Acc:Q9D753]
ENSMUSG00000029012	Orc5	83.2	182.2	0.85	0.00820821	0.248603	83.2	182.2	0.96	0.00287446	0.144451	5	22486485	22550429	6166	38.99	-1	protein_coding	Origin recognition complex subunit 5 [Source:UniProtKB/Swiss-Prot;Acc:Q9WUV0]
ENSMUSG00000030677	Kif22	28.9	59.8	0.85	0.00400571	0.172103	28.9	59.8	0.81	0.0120336	0.310158	7	127027729	127042471	4903	46.86	-1	protein_coding	Kinesin-like protein KIF22 [Source:UniProtKB/Swiss-Prot;Acc:Q3V300]
ENSMUSG00000040666	Sh3bgr	13.6	31.5	0.85	0.0140719	0.366252	13.6	31.5	0.87	0.0211293	0.42066	16	96200470	96228933	1542	45.78	1	protein_coding	SH3 domain-binding glutamic acid-rich protein [Source:UniProtKB/Swiss-Prot;Acc:Q9WUZ7]
ENSMUSG00000041046	Ramp3	0.3	8.9	0.85	0.0101129	1	0.3	8.9	0.86	0.0164913	1	11	6658521	6677475	1380	51.45	1	protein_coding	Receptor activity-modifying protein 3 [Source:UniProtKB/Swiss-Prot;Acc:Q9WUP1]
ENSMUSG00000048644	Ctxn1	18.6	45.8	0.85	0.0185763	0.378606	18.6	45.8	0.81	0.0372904	0.523917	8	4257660	4259274	1212	61.42	-1	protein_coding	Cortexin-1 [Source:UniProtKB/Swiss-Prot;Acc:Q8K129]
ENSMUSG00000084289	Gm6977	402	770	0.85	0.000123985	0.0154804	402	770	0.84	0.000457994	0.0422535	X	90744546	90745062	512	45.65	-1	processed_pseudogene	predicted gene 6977 [Source:MGI Symbol;Acc:MGI:3647597]
ENSMUSG00000091985	Gm17354	7.6	25.8	0.85	0.0251182	0.466275	7.6	25.8	0.96	0.0181846	0.420579	4	108633843	108637441	3039	45.1	-1	lincRNA	predicted gene, 17354 [Source:MGI Symbol;Acc:MGI:4936988]
ENSMUSG00000103238	Gm36527	0.5	15	0.85	0.0101056	0.471924	0.5	15	1.1	0.0037681	0.285622	1	151496557	151499585	3029	40.84	-1	TEC	predicted gene, 36527 [Source:MGI Symbol;Acc:MGI:5595686]
ENSMUSG00000104913	Gm6560	7.5	23.7	0.85	0.0251595	0.525674	7.5	23.7	0.99	0.0134022	0.342423	5	22724578	22726168	1591	56.07	-1	processed_pseudogene	predicted gene 6560 [Source:MGI Symbol;Acc:MGI:3646204]
ENSMUSG00000106306	4933401H06Rik	1.4	11.7	0.85	0.0163417	0.583057	1.4	11.7	0.87	0.0240838	0.628133	3	135833701	135840269	1202	42.29	-1	processed_transcript	RIKEN cDNA 4933401H06 gene [Source:MGI Symbol;Acc:MGI:1918288]
ENSMUSG00000108722	Gm34225	0.3	8.5	0.85	0.0104582	1	0.3	8.5	0.86	0.01733	1	7	115031937	115066824	803	40.24	1	lincRNA	predicted gene, 34225 [Source:MGI Symbol;Acc:MGI:5593384]
ENSMUSG00000000782	Tcf7	73.9	161.8	0.84	0.0111488	0.291488	73.9	161.8	0.7	0.0419721	0.529238	11	52252371	52283014	2625	52.81	-1	protein_coding	transcription factor 7, T cell specific [Source:MGI Symbol;Acc:MGI:98507]
ENSMUSG00000003033	Ap1m1	32.8	72.9	0.84	0.011329	0.348683	32.8	72.9	1.02	0.00140831	0.0971313	8	72240018	72257385	3184	51.96	1	protein_coding	AP-1 complex subunit mu-1 [Source:UniProtKB/Swiss-Prot;Acc:P35585]
ENSMUSG00000015880	Ncapg	61.4	121.9	0.84	0.00146525	0.0914737	61.4	121.9	0.86	0.00315392	0.151715	5	45669919	45700546	7066	36.05	1	protein_coding	non-SMC condensin I complex subunit G [Source:HGNC Symbol;Acc:HGNC:24304]
ENSMUSG00000017499	Cdc6	18.3	43.5	0.84	0.0183125	0.459042	18.3	43.5	0.85	0.0266565	0.46543	11	98907801	98923940	5229	47.81	1	protein_coding	Cell division control [Source:UniProtKB/Swiss-Prot;Acc:O89033]
ENSMUSG00000025082	Vwa2	7.9	26.1	0.84	0.0264965	0.564824	7.9	26.1	0.8	0.0497567	0.626737	19	56874249	56912078	4049	49.84	1	protein_coding	von Willebrand factor A domain containing 2 [Source:MGI Symbol;Acc:MGI:2684334]
ENSMUSG00000028360	Slc44a5	2.7	13.6	0.84	0.0227535	0.915774	2.7	13.6	0.83	0.0370617	0.705629	3	153973436	154271722	7143	43.43	1	protein_coding	solute carrier family 44, member 5 [Source:MGI Symbol;Acc:MGI:3035141]
ENSMUSG00000032058	Ppp2r1b	90.3	173.4	0.84	0.000598594	0.0498258	90.3	173.4	0.82	0.00217691	0.120142	9	50845301	50894229	6449	46.9	1	protein_coding	protein phosphatase 2, regulatory subunit A, beta [Source:MGI Symbol;Acc:MGI:1920949]
ENSMUSG00000032397	Tipin	92.7	183.5	0.84	0.00166162	0.097748	92.7	183.5	0.86	0.00286341	0.151715	9	64281581	64305424	1869	41.1	1	protein_coding	TIMELESS-interacting protein [Source:UniProtKB/Swiss-Prot;Acc:Q91WA1]
ENSMUSG00000033955	Tnks1bp1	35	70.6	0.84	0.00245942	0.126977	35	70.6	0.94	0.000968086	0.0724793	2	85048022	85073048	6184	53.22	1	protein_coding	182 kDa tankyrase-1-binding protein [Source:UniProtKB/Swiss-Prot;Acc:P58871]
ENSMUSG00000040084	Bub1b	49.2	97.8	0.84	0.00141524	0.0888046	49.2	97.8	0.91	0.000942967	0.0716587	2	118598211	118641591	4275	43.72	1	protein_coding	Mitotic checkpoint serine/threonine-protein kinase BUB1 beta [Source:UniProtKB/Swiss-Prot;Acc:Q9Z1S0]
ENSMUSG00000048285	Frmd6	6.1	22.7	0.84	0.0265338	0.578194	6.1	22.7	0.85	0.0386159	0.73874	12	70825514	70902234	6392	44.67	1	protein_coding	FERM domain-containing protein 6 [Source:UniProtKB/Swiss-Prot;Acc:Q8C0V9]
ENSMUSG00000065732	Gm24492	4.6	15.2	0.84	0.0272297	0.868774	4.6	15.2	0.98	0.0152016	0.540513	17	84287641	84287747	107	41.12	-1	snRNA	predicted gene, 24492 [Source:MGI Symbol;Acc:MGI:5454269]
ENSMUSG00000066842	Hmcn1	2.6	11.9	0.84	0.0237239	0.645395	2.6	11.9	0.77	0.0586791	0.800269	1	150562524	150993435	21191	39.42	-1	protein_coding	Hemicentin-1 [Source:UniProtKB/Swiss-Prot;Acc:D3YXG0]
ENSMUSG00000085111	Ascl4	2.4	16.3	0.84	0.0190761	0.496239	2.4	16.3	0.85	0.0300361	0.689905	10	85927681	85946206	2238	45.39	1	protein_coding	achaete-scute family bHLH transcription factor 4 [Source:MGI Symbol;Acc:MGI:1914591]
ENSMUSG00000105742	Gm42748	1	6.4	0.84	0.021038	1	1	6.4	0.9	0.0229167	1	5	122165597	122167937	2341	48.36	1	TEC	predicted gene 42748 [Source:MGI Symbol;Acc:MGI:5662885]
ENSMUSG00000004947	Dtx2	11.8	26.5	0.83	0.0136833	0.42128	11.8	26.5	0.86	0.0190891	0.415305	5	135994800	136032872	7032	50.66	1	protein_coding	Probable E3 ubiquitin-protein ligase DTX2 [Source:UniProtKB/Swiss-Prot;Acc:Q8R3P2]
ENSMUSG00000009076	Zmat5	15.3	58.3	0.83	0.026845	0.437529	15.3	58.3	1.17	0.00396217	0.187399	11	4704678	4737669	1248	49.16	1	protein_coding	zinc finger, matrin type 5 [Source:MGI Symbol;Acc:MGI:1914428]
ENSMUSG00000020592	Sdc1	64.7	132.8	0.83	0.00623646	0.21928	64.7	132.8	0.74	0.0207311	0.400124	12	8771323	8793715	3809	52.95	1	protein_coding	syndecan 1 [Source:MGI Symbol;Acc:MGI:1349162]
ENSMUSG00000026047	Kdelc1	17.9	45.9	0.83	0.0230845	0.410386	17.9	45.9	0.87	0.028115	0.46543	1	44106546	44118808	3199	39.45	-1	protein_coding	KDEL motif-containing protein 1 [Source:UniProtKB/Swiss-Prot;Acc:Q9JHP7]
ENSMUSG00000034912	Mdga2	4.9	16.8	0.83	0.0277399	0.598895	4.9	16.8	0.73	0.076163	0.868681	12	66466060	67222549	18336	36.31	-1	protein_coding	MAM domain-containing glycosylphosphatidylinositol anchor protein 2 [Source:UniProtKB/Swiss-Prot;Acc:P60755]
ENSMUSG00000035086	Becn1	71.5	167.7	0.83	0.0189372	0.378606	71.5	167.7	0.88	0.0173675	0.382367	11	101285952	101302286	7065	45.86	-1	protein_coding	Beclin-1 Beclin-1-C 35 kDa Beclin-1-C 37 kDa [Source:UniProtKB/Swiss-Prot;Acc:O88597]
ENSMUSG00000042179	Pnliprp1	91.9	189.9	0.83	0.00629936	0.219754	91.9	189.9	0.93	0.00209156	0.122618	19	58728887	58744169	1619	45.92	1	protein_coding	pancreatic lipase related protein 1 [Source:MGI Symbol;Acc:MGI:97723]
ENSMUSG00000044716	Dok7	2.7	9.6	0.83	0.0275758	0.944608	2.7	9.6	0.77	0.0589684	0.812246	5	35056766	35087839	4275	55.14	1	protein_coding	Mus musculus docking protein 7 (Dok7), transcript variant 4, mRNA. [Source:RefSeq mRNA;Acc:NM_001348276]
ENSMUSG00000061947	Serpina10	3.2	16.5	0.83	0.023332	0.560426	3.2	16.5	0.97	0.0176395	0.560415	12	103614786	103631444	3498	45.09	-1	protein_coding	Protein Z-dependent protease inhibitor [Source:UniProtKB/Swiss-Prot;Acc:Q8R121]
ENSMUSG00000086373	Gm11978	3	14.1	0.83	0.0251899	0.662685	3	14.1	0.88	0.0281298	0.658279	11	6650148	6660233	1409	49.19	-1	transcribed_processed_pseudogene	predicted gene 11978 [Source:MGI Symbol;Acc:MGI:3650695]
ENSMUSG00000003527	Dgcr14	25.6	53	0.82	0.00693338	0.231339	25.6	53	0.87	0.0074936	0.237477	16	17900711	17911348	2819	50.86	-1	protein_coding	protein DGCR14 isoform 2 [Source:RefSeq peptide;Acc:NP_001075102]
ENSMUSG00000008307	1700109H08Rik	3.4	15.5	0.82	0.028183	0.560426	3.4	15.5	0.92	0.0231284	0.639934	5	3571566	3584356	3062	43.13	1	protein_coding	RIKEN cDNA 1700109H08 gene [Source:MGI Symbol;Acc:MGI:1924286]
ENSMUSG00000020034	Tcp11l2	47.1	93	0.82	0.00277544	0.141859	47.1	93	0.93	0.000879448	0.0687393	10	84576626	84614359	3438	44.99	1	protein_coding	T-complex protein 11-like protein 2 [Source:UniProtKB/Swiss-Prot;Acc:Q8K1H7]
ENSMUSG00000020086	H2afy2	4.8	22.8	0.82	0.0262977	0.540807	4.8	22.8	0.91	0.0248513	0.644766	10	61738665	61784147	2175	47.84	-1	protein_coding	Core histone macro-H2A.2 [Source:UniProtKB/Swiss-Prot;Acc:Q8CCK0]
ENSMUSG00000021253	Tgfb3	1	12.2	0.82	0.0166535	0.869623	1	12.2	0.98	0.0108949	0.472079	12	86056745	86079041	3383	48.98	-1	protein_coding	transforming growth factor, beta 3 [Source:MGI Symbol;Acc:MGI:98727]
ENSMUSG00000031360	Ctps2	94.8	188.4	0.82	0.00445598	0.179353	94.8	188.4	0.82	0.00839032	0.251781	X	162901238	163032508	4720	42.77	1	protein_coding	CTP synthase 2 [Source:UniProtKB/Swiss-Prot;Acc:P70303]
ENSMUSG00000031714	Gab1	44.1	93.2	0.82	0.0102542	0.277482	44.1	93.2	0.94	0.00402418	0.176678	8	80764438	80880519	5082	44.85	-1	protein_coding	GRB2-associated-binding protein 1 [Source:UniProtKB/Swiss-Prot;Acc:Q9QYY0]
ENSMUSG00000033059	Pygb	19.2	48	0.82	0.024459	0.516446	19.2	48	0.87	0.0262317	0.46543	2	150786735	150831758	4809	48.36	1	protein_coding	Glycogen phosphorylase, brain form [Source:UniProtKB/Swiss-Prot;Acc:Q8CI94]
ENSMUSG00000040253	Gbp7	53.6	130	0.82	0.0230037	0.410311	53.6	130	0.69	0.0505591	0.57113	3	142530342	142550149	5614	41.26	1	protein_coding
ENSMUSG00000045273	Cenph	42.6	113.2	0.82	0.0286305	0.447752	42.6	113.2	0.94	0.0161215	0.35496	13	100759674	100775899	1784	43.55	-1	protein_coding	Centromere protein H [Source:UniProtKB/Swiss-Prot;Acc:Q9QYM8]
ENSMUSG00000047141	Zfp654	63.2	133.9	0.82	0.0108544	0.286237	63.2	133.9	0.86	0.012015	0.310158	16	64780347	64851652	6261	37.68	-1	protein_coding	zinc finger protein 654 [Source:MGI Symbol;Acc:MGI:1919270]
ENSMUSG00000069727	Zfp975	11.1	30.6	0.82	0.0276002	0.561323	11.1	30.6	0.9	0.0247709	0.46543	7	42660105	42692742	4460	40.09	-1	protein_coding	zinc finger protein 975 [Source:MGI Symbol;Acc:MGI:3648690]
ENSMUSG00000112338	Gm47693	2.8	11.8	0.82	0.0294299	0.705642	2.8	11.8	0.82	0.0432012	0.763359	10	31555920	31557440	1521	36.88	-1	TEC	predicted gene, 47693 [Source:MGI Symbol;Acc:MGI:6096801]
ENSMUSG00000013089	Etv5	18.2	45.6	0.81	0.0283656	0.447447	18.2	45.6	0.82	0.0164028	0.416737	16	22381309	22439719	4103	46.37	-1	protein_coding	ETS translocation variant 5 [Source:UniProtKB/Swiss-Prot;Acc:Q9CXC9]
ENSMUSG00000022435	Upk3a	14	36.5	0.81	0.031623	0.606286	14	36.5	0.75	0.0446314	0.624533	15	85017141	85022547	1093	53.19	1	protein_coding	uroplakin 3A [Source:MGI Symbol;Acc:MGI:98914]
ENSMUSG00000024050	Wiz	38.8	74.6	0.81	0.00165982	0.097748	38.8	74.6	0.87	0.00211463	0.11874	17	32354055	32389401	9204	49.23	-1	protein_coding	widely-interspaced zinc finger motifs [Source:MGI Symbol;Acc:MGI:1332638]
ENSMUSG00000027811	4930579G24Rik	9.8	27.4	0.81	0.0321333	0.593553	9.8	27.4	0.86	0.0335266	0.499551	3	79629079	79632820	1970	44.09	1	protein_coding	Uncharacterized [Source:UniProtKB/Swiss-Prot;Acc:Q3UUX7]
ENSMUSG00000028807	Zbtb8a	24.7	50.6	0.81	0.00976299	0.275153	24.7	50.6	0.8	0.0198233	0.398396	4	129353628	129378116	2321	46.75	-1	protein_coding	zinc finger and BTB domain containing 8a [Source:MGI Symbol;Acc:MGI:1920930]
ENSMUSG00000033054	Npat	68.7	132.4	0.81	0.00207433	0.11331	68.7	132.4	0.83	0.00371109	0.166788	9	53537047	53574342	6248	37.6	1	protein_coding	Protein NPAT [Source:UniProtKB/Swiss-Prot;Acc:Q8BMA5]
ENSMUSG00000039004	Bmp6	1.5	15.1	0.81	0.0192596	0.889123	1.5	15.1	1.05	0.00767444	0.413932	13	38345107	38500302	3900	44.78	1	protein_coding	Bone morphotic protein 6 [Source:UniProtKB/Swiss-Prot;Acc:P20722]
ENSMUSG00000047501	Cldn4	97.2	197.9	0.81	0.00839226	0.251836	97.2	197.9	0.87	0.00640764	0.224801	5	134945119	134946934	1816	56.83	-1	protein_coding	Claudin-4 [Source:UniProtKB/Swiss-Prot;Acc:O35054]
ENSMUSG00000048677	Tpcn2	18.8	60.2	0.81	#N/A	#N/A	18.8	60.2	0.94	0.0195363	0.420579	7	145186524	145284011	5256	51.45	-1	protein_coding	Two pore calcium channel protein 2 [Source:UniProtKB/Swiss-Prot;Acc:Q8BWC0]
ENSMUSG00000055660	Mettl4	14.6	45.4	0.81	#N/A	#N/A	14.6	45.4	0.91	0.0244729	0.471341	17	94727080	94749892	2150	38.87	-1	protein_coding	Methyltransferase-like protein 4 [Source:UniProtKB/Swiss-Prot;Acc:Q3U034]
ENSMUSG00000063765	Chadl	0.5	5.1	0.81	0.0197062	1	0.5	5.1	0.8	0.0315449	1	15	81678296	81697287	5257	54.38	-1	protein_coding	Chondroadherin-like protein [Source:UniProtKB/Swiss-Prot;Acc:E9Q7T7]
ENSMUSG00000081272	Gm13509	22.7	51.2	0.81	0.0192789	0.437529	22.7	51.2	0.89	0.0137738	0.382367	2	49308155	49309462	1308	51.99	1	processed_pseudogene	predicted gene 13509 [Source:MGI Symbol;Acc:MGI:3649640]
ENSMUSG00000097385	Gm26814	16.7	37.1	0.81	0.0185045	0.376115	16.7	37.1	0.93	0.0101092	0.285786	6	4942147	4946295	4149	38.44	1	TEC	predicted gene, 26814 [Source:MGI Symbol;Acc:MGI:5477308]
ENSMUSG00000105326	6030400A10Rik	4.9	15.7	0.81	0.0332061	0.643324	4.9	15.7	0.78	0.0562888	0.800269	5	43265157	43266368	1212	35.97	1	TEC	RIKEN cDNA 6030400A10 gene [Source:MGI Symbol;Acc:MGI:1924319]
ENSMUSG00000005233	Spc25	72.8	156.6	0.8	0.0187487	0.377157	72.8	156.6	0.83	0.0140735	0.334947	2	69193895	69206194	3188	39.94	-1	protein_coding	Kinetochore protein Spc25 [Source:UniProtKB/Swiss-Prot;Acc:Q3UA16]
ENSMUSG00000005674	Tomm40l	0.3	4.9	0.8	0.0167821	1	0.3	4.9	0.75	0.033759	1	1	171216011	171222514	5135	52.18	-1	protein_coding	Mitochondrial import receptor subunit TOM40B [Source:UniProtKB/Swiss-Prot;Acc:Q9CZR3]
ENSMUSG00000006777	Krt23	181.6	358	0.8	0.00722347	0.239526	181.6	358	0.74	0.0171551	0.375642	11	99477974	99493137	1565	45.48	-1	protein_coding	Keratin, type I cytoskeletal 23 [Source:UniProtKB/Swiss-Prot;Acc:Q99PS0]
ENSMUSG00000020376	Rnf130	98.8	180.7	0.8	0.000174609	0.0199675	98.8	180.7	0.79	0.00100928	0.078558	11	50025346	50104758	1558	41.05	1	protein_coding	ring finger protein 130 [Source:MGI Symbol;Acc:MGI:1891717]
ENSMUSG00000028597	Gpx7	8.1	21.4	0.8	0.0332912	0.524063	8.1	21.4	0.87	0.0301235	0.506876	4	108400390	108406961	1289	47.93	-1	protein_coding	Glutathione peroxidase 7 [Source:UniProtKB/Swiss-Prot;Acc:Q99LJ6]
ENSMUSG00000031778	Cx3cl1	7.1	19	0.8	0.0323767	0.900574	7.1	19	0.89	0.0245804	0.642303	8	94772009	94782427	3930	52.68	1	protein_coding	chemokine (C-X3-C motif) ligand 1 [Source:MGI Symbol;Acc:MGI:1097153]
ENSMUSG00000039997	Ifi203	2	24.1	0.8	0.0181925	0.499541	2	24.1	0.98	0.0104282	0.46543	1	173920407	173942672	6706	37.94	-1	protein_coding
ENSMUSG00000044986	Tst	80.8	150.6	0.8	0.000782695	0.0613914	80.8	150.6	0.76	0.00293282	0.146772	15	78399556	78405907	1144	52.39	-1	protein_coding	thiosulfate sulfurtransferase, mitochondrial [Source:MGI Symbol;Acc:MGI:98852]
ENSMUSG00000046879	Irgm1	141.2	276.5	0.8	0.00526358	0.195167	141.2	276.5	0.69	0.0210101	0.412119	11	48861968	48871683	5810	45.76	-1	protein_coding	Mus musculus immunity-related GTPase family M member 1 (Irgm1), transcript variant 2, mRNA. [Source:RefSeq mRNA;Acc:NM_001355757]
ENSMUSG00000048960	Prex2	8.4	24.9	0.8	0.0353258	0.617484	8.4	24.9	0.78	0.0565816	0.653845	1	10993465	11303681	16609	39.1	1	protein_coding	Phosphatidylinositol 3,4,5-trisphosphate-dependent Rac exchanger 2 protein [Source:UniProtKB/Swiss-Prot;Acc:Q3LAC4]
ENSMUSG00000055897	Ppp4r1l-ps	44.2	90	0.8	0.00936342	0.268316	44.2	90	0.96	0.00105201	0.0770743	2	173579320	173659640	12025	47.28	-1	transcribed_unprocessed_pseudogene	protein phosphatase 4, regulatory subunit 1-like, pseudogene [Source:MGI Symbol;Acc:MGI:1924560]
ENSMUSG00000059248	Sept9	39.8	78.8	0.8	0.0059616	0.217418	39.8	78.8	0.8	0.0121881	0.317653	11	117199661	117362325	7565	53.01	1	protein_coding	Septin-9 [Source:UniProtKB/Swiss-Prot;Acc:Q80UG5]
ENSMUSG00000063018	2010204K13Rik	17.8	42.4	0.8	0.0272882	0.445765	17.8	42.4	0.85	0.0281342	0.497443	X	7411817	7445143	1583	43.31	-1	processed_transcript	RIKEN cDNA 2010204K13 gene [Source:MGI Symbol;Acc:MGI:1922859]
ENSMUSG00000063382	Bcl9l	46.6	89.1	0.8	0.00223503	0.117879	46.6	89.1	0.94	0.000259728	0.0290915	9	44482825	44511896	7998	56.61	1	protein_coding	Mus musculus B cell CLL/lymphoma 9-like (Bcl9l), transcript variant 2, mRNA. [Source:RefSeq mRNA;Acc:NM_001357490]
ENSMUSG00000072761	Gm6712	9.5	22.2	0.8	0.02568	0.537588	9.5	22.2	0.84	0.0295753	0.523917	17	17294443	17319511	594	39.65	1	lincRNA	predicted gene 6712 [Source:MGI Symbol;Acc:MGI:3645888]
ENSMUSG00000074476	Spc24	55.4	110.8	0.8	0.00649856	0.220257	55.4	110.8	0.86	0.00530196	0.205518	9	21755442	21760303	2573	51.52	-1	protein_coding	Kinetochore protein Spc24 [Source:UniProtKB/Swiss-Prot;Acc:Q9D083]
ENSMUSG00000081070	Gm13181	21.3	45	0.8	0.0142071	0.338852	21.3	45	0.88	0.0117799	0.342423	2	3686362	3687430	1069	49.77	1	processed_pseudogene	predicted gene 13181 [Source:MGI Symbol;Acc:MGI:3650464]
ENSMUSG00000084792	1700056N10Rik	8	21.4	0.8	0.0331772	0.523366	8	21.4	0.81	0.0454676	0.590506	16	17047520	17049111	1043	45.73	1	lincRNA	RIKEN cDNA 1700056N10 gene [Source:MGI Symbol;Acc:MGI:1920642]
ENSMUSG00000022545	Ercc4	32.5	72.2	0.79	0.0232675	0.410386	32.5	72.2	0.87	0.0159739	0.382367	16	13109684	13150617	6730	46.1	1	protein_coding	DNA repair endonuclease XPF [Source:UniProtKB/Swiss-Prot;Acc:Q9QZD4]
ENSMUSG00000026782	Abi2	72.6	141.2	0.79	0.00782228	0.242508	72.6	141.2	0.79	0.013208	0.338943	1	60409619	60481158	8543	38.27	1	protein_coding	abl-interactor 2 [Source:MGI Symbol;Acc:MGI:106913]
ENSMUSG00000028268	Gbp3	16.6	41.5	0.79	0.0329045	0.549625	16.6	41.5	0.68	0.0865656	0.751645	3	142560026	142573209	3265	42.55	1	protein_coding	Mus musculus guanylate binding protein 3 (Gbp3), transcript variant 4, mRNA. [Source:RefSeq mRNA;Acc:NM_001355403]
ENSMUSG00000031349	Nsdhl	54.9	106	0.79	0.00488116	0.187817	54.9	106	0.75	0.0141948	0.362291	X	72918557	72958514	2853	43.13	1	protein_coding	Sterol-4-alpha-carboxylate 3-dehydrogenase, decarboxylating [Source:UniProtKB/Swiss-Prot;Acc:Q9R1J0]
ENSMUSG00000032046	Abhd12	104.3	191.6	0.79	0.000528404	0.0447604	104.3	191.6	0.74	0.00311921	0.148748	2	150832493	150904741	2823	43.91	-1	protein_coding	abhydrolase domain containing 12 [Source:MGI Symbol;Acc:MGI:1923442]
ENSMUSG00000034177	Rnf43	144.2	264.1	0.79	0.000296773	0.0313044	144.2	264.1	0.87	0.000130664	0.0173574	11	87662722	87735539	6558	46.21	1	protein_coding	E3 ubiquitin-protein ligase RNF43 [Source:UniProtKB/Swiss-Prot;Acc:Q5NCP0]
ENSMUSG00000040711	Sh3pxd2b	9.1	22.6	0.79	0.0339465	0.610982	9.1	22.6	0.75	0.0595785	0.635058	11	32347820	32428173	9709	48.39	1	protein_coding	SH3 and PX domain-containing protein 2B [Source:UniProtKB/Swiss-Prot;Acc:A2AAY5]
ENSMUSG00000042705	Commd10	59.4	125.5	0.79	0.0166175	0.358975	59.4	125.5	0.99	0.00318565	0.162398	18	46958862	47087992	1561	40.96	1	protein_coding	COMM domain-containing protein 10 [Source:UniProtKB/Swiss-Prot;Acc:Q8JZY2]
ENSMUSG00000044022	Pcdhb21	2	9.5	0.79	0.0310494	0.954121	2	9.5	0.83	0.0368721	0.737636	18	37513621	37518325	4705	42.51	1	protein_coding	protocadherin beta 21 [Source:MGI Symbol;Acc:MGI:2136759]
ENSMUSG00000047407	Tgif1	183.4	354.1	0.79	0.00525871	0.195167	183.4	354.1	0.75	0.0118029	0.315646	17	70844205	70853546	5625	49.06	-1	protein_coding	TGFB-induced factor homeobox 1 [Source:MGI Symbol;Acc:MGI:1194497]
ENSMUSG00000052560	Cpne8	24.5	53.9	0.79	0.0227492	0.409954	24.5	53.9	0.81	0.0297617	0.46543	15	90487482	90679432	4164	40.28	-1	protein_coding	Mus musculus copine VIII (Cpne8), transcript variant 3, mRNA. [Source:RefSeq mRNA;Acc:NM_001357979]
ENSMUSG00000060427	Zfp868	49	103.6	0.79	0.0176072	0.368906	49	103.6	0.87	0.0112219	0.294434	8	69610857	69625548	2893	43.75	-1	protein_coding	zinc finger protein 868 [Source:MGI Symbol;Acc:MGI:2142546]
ENSMUSG00000091697	Eif3s6-ps2	32.2	65.9	0.79	0.0144104	0.336499	32.2	65.9	0.88	0.00834589	0.277286	18	90311825	90312043	219	42.01	-1	processed_pseudogene	eukaryotic translation initiation factor 3, subunit 6, pseudogene 2 [Source:MGI Symbol;Acc:MGI:103204]
ENSMUSG00000098090	2700099C18Rik	20.5	42.8	0.79	0.0162432	0.358975	20.5	42.8	0.7	0.0496226	0.626737	17	94750100	94775132	2181	40.95	1	transcribed_unprocessed_pseudogene	RIKEN cDNA 2700099C18 gene [Source:MGI Symbol;Acc:MGI:1924272]
ENSMUSG00000099843	Gm7160	11.8	27	0.79	0.025243	0.531352	11.8	27	0.85	0.0269779	0.46543	1	105979350	105990282	1417	40.99	-1	lincRNA	predicted gene 7160 [Source:MGI Symbol;Acc:MGI:3646078]
ENSMUSG00000101892	9130401M01Rik	27	53.5	0.79	0.0081139	0.293693	27	53.5	0.81	0.01428	0.362291	15	58022259	58034325	2666	49.15	-1	protein_coding	Uncharacterized [Source:UniProtKB/Swiss-Prot;Acc:Q9D2X8]
ENSMUSG00000104571	Gm43010	10.8	35.8	0.79	0.0369524	0.629118	10.8	35.8	0.87	0.0339828	0.495663	3	126625880	126628757	2878	37.94	1	TEC	predicted gene 43010 [Source:MGI Symbol;Acc:MGI:5663147]
ENSMUSG00000009108	Gnat2	24.9	56.1	0.78	0.0283659	0.447447	24.9	56.1	0.81	0.0300629	0.46543	3	108092789	108101432	2995	46.74	1	protein_coding	guanine nucleotide binding protein, alpha transducing 2 [Source:MGI Symbol;Acc:MGI:95779]
ENSMUSG00000010751	Tnfrsf22	0.6	7.9	0.78	0.0194533	1	0.6	7.9	0.8	0.0277766	1	7	143634806	143649661	4217	45.47	-1	protein_coding	Tumor necrosis factor receptor superfamily member 22 [Source:UniProtKB/Swiss-Prot;Acc:Q9ER62]
ENSMUSG00000023186	Vwa5a	99.1	191.3	0.78	0.00685038	0.229792	99.1	191.3	1.02	2.58194e-05	0.00487549	9	38718268	38743337	4899	38.51	1	protein_coding	von Willebrand factor A domain containing 5A [Source:MGI Symbol;Acc:MGI:1915026]
ENSMUSG00000025194	Abcc2	42	88.1	0.78	0.0198547	0.385234	42	88.1	0.88	0.0124484	0.332364	19	43782192	43840740	8532	44.5	1	protein_coding	Canalicular multispecific organic anion transporter 1 [Source:UniProtKB/Swiss-Prot;Acc:Q8VI47]
ENSMUSG00000027087	Itgav	72.6	135	0.78	0.00113021	0.0751258	72.6	135	0.81	0.00196344	0.109308	2	83724397	83806916	10744	41.34	1	protein_coding	Integrin alpha-V Integrin alpha-V heavy chain Integrin alpha-V light chain [Source:UniProtKB/Swiss-Prot;Acc:P43406]
ENSMUSG00000030519	Apba2	6.5	24.4	0.78	0.0376018	0.645395	6.5	24.4	0.88	0.0309039	0.475787	7	64501706	64753878	3824	46.43	1	protein_coding	Amyloid-beta A4 protein-binding family A member 2 [Source:UniProtKB/Swiss-Prot;Acc:P98084]
ENSMUSG00000032316	Clk3	26.7	55.8	0.78	0.0192542	0.379379	26.7	55.8	0.85	0.013714	0.337902	9	57750624	57765860	8450	52.03	-1	protein_coding	Dual specificity protein kinase CLK3 [Source:UniProtKB/Swiss-Prot;Acc:O35492]
ENSMUSG00000032586	Traip	13.3	33.2	0.78	0.0358916	0.620202	13.3	33.2	0.81	0.0409953	0.53369	9	107950136	107972270	6281	49.06	1	protein_coding	E3 ubiquitin-protein ligase TRAIP [Source:UniProtKB/Swiss-Prot;Acc:Q8VIG6]
ENSMUSG00000036403	Cep135	38.9	92.2	0.78	0.0326638	0.478165	38.9	92.2	0.81	0.0369391	0.499551	5	76588698	76646466	7188	43.55	1	protein_coding	Centrosomal protein of 135 kDa [Source:UniProtKB/Swiss-Prot;Acc:Q6P5D4]
ENSMUSG00000036748	Cuedc2	70.3	145.7	0.78	0.016925	0.362619	70.3	145.7	0.88	0.00705471	0.230231	19	46329812	46338660	1941	51.67	-1	protein_coding	CUE domain-containing protein 2 [Source:UniProtKB/Swiss-Prot;Acc:Q9CXX9]
ENSMUSG00000037434	Slc30a1	28.7	60.3	0.78	0.0215666	0.402168	28.7	60.3	0.8	0.0289074	0.46543	1	191906767	191913247	5244	46.89	1	protein_coding	solute carrier family 30 (zinc transporter), member 1 [Source:MGI Symbol;Acc:MGI:1345281]
ENSMUSG00000041817	Fam169a	2.5	8.1	0.78	0.0376822	1	2.5	8.1	0.75	0.0643348	1	13	97067286	97131013	6082	41.96	1	protein_coding	Soluble lamin-associated protein of 75 kDa [Source:UniProtKB/Swiss-Prot;Acc:Q5XG69]
ENSMUSG00000051236	Msrb3	0	9.8	0.78	0.013046	1	0	9.8	0.89	0.0113172	1	10	120781096	120899101	4048	43.46	-1	protein_coding	methionine sulfoxide reductase B3 [Source:HGNC Symbol;Acc:HGNC:27375]
ENSMUSG00000068101	Cenpm	23.6	50.5	0.78	0.0234062	0.507594	23.6	50.5	0.96	0.00546668	0.21457	15	82233779	82244748	1617	49.85	-1	protein_coding	Centromere protein M [Source:UniProtKB/Swiss-Prot;Acc:Q9CQA0]
ENSMUSG00000069208	Zfp825	45.1	91.7	0.78	0.0156074	0.348488	45.1	91.7	0.91	0.00543647	0.206167	13	74480054	74493992	1552	40.62	-1	protein_coding	zinc finger protein 825 [Source:MGI Symbol;Acc:MGI:2385315]
ENSMUSG00000074151	Nlrc5	11.4	31.7	0.78	0.0382641	0.633296	11.4	31.7	0.72	0.0764978	0.667391	8	94434356	94527272	8493	46.95	1	protein_coding	Protein NLRC5 [Source:UniProtKB/Swiss-Prot;Acc:C3VPR6]
ENSMUSG00000079555	Haus3	67.3	143.3	0.78	0.0228527	0.410008	67.3	143.3	0.81	0.0248606	0.460353	5	34153880	34169527	3871	36.29	-1	protein_coding	HAUS augmin-like complex subunit 3 [Source:UniProtKB/Swiss-Prot;Acc:Q8QZX2]
ENSMUSG00000096687	Mfsd4b4	8.3	24.6	0.78	0.0386252	0.632143	8.3	24.6	0.81	0.0481212	0.639934	10	39890018	39899238	3833	47.28	-1	protein_coding
ENSMUSG00000115299	AC154738.5	5.7	14.5	0.78	0.0375099	0.65439	5.7	14.5	0.78	0.053951	0.781209	14	34218076	34218385	310	46.77	1	processed_pseudogene
ENSMUSG00000001983	Taco1	6.1	17.1	0.77	0.0403802	0.935446	6.1	17.1	0.85	0.0363204	0.723427	11	106066061	106073612	1383	46.69	1	protein_coding	Translational activator of cytochrome c oxidase 1 [Source:UniProtKB/Swiss-Prot;Acc:Q8K0Z7]
ENSMUSG00000006800	Sulf2	7.8	24.9	0.77	0.0408053	0.65146	7.8	24.9	0.84	0.0388859	0.562248	2	166073089	166155663	5871	52.54	-1	protein_coding	Mus musculus sulfatase 2 (Sulf2), transcript variant 4, mRNA. [Source:RefSeq mRNA;Acc:NM_001355619]
ENSMUSG00000021835	Bmp4	0.9	8.7	0.77	0.024779	1	0.9	8.7	0.75	0.0415751	1	14	46383520	46390669	2248	53.05	-1	protein_coding	Bone morphotic protein 4 [Source:UniProtKB/Swiss-Prot;Acc:P21275]
ENSMUSG00000027405	Nop56	115.6	216	0.77	0.00319011	0.14878	115.6	216	0.9	0.00019368	0.0238242	2	130274430	130279313	4099	50.33	1	protein_coding	Nucleolar protein 56 [Source:UniProtKB/Swiss-Prot;Acc:Q9D6Z1]
ENSMUSG00000027737	Slc7a11	34	77.5	0.77	0.0317614	0.472052	34	77.5	0.87	0.015169	0.351884	3	49892526	50443614	13922	38.81	-1	protein_coding	solute carrier family 7 (cationic amino acid transporter, y+ system), member 11 [Source:MGI Symbol;Acc:MGI:1347355]
ENSMUSG00000028089	Chd1l	43.7	82.2	0.77	0.00289767	0.141991	43.7	82.2	0.8	0.00541737	0.20336	3	97560742	97610203	4309	46.54	-1	protein_coding	Chromodomain-helicase-DNA-binding protein 1-like [Source:UniProtKB/Swiss-Prot;Acc:Q9CXF7]
ENSMUSG00000029605	Oas1b	6.2	14.8	0.77	0.0369224	0.652452	6.2	14.8	0.83	0.0365345	0.724395	5	120812635	120824163	1992	49.64	1	polymorphic_pseudogene	Mus musculus 2'-5' oligoadenylate synthetase 1B (Oas1b), transcript variant 1, coding, mRNA. [Source:RefSeq mRNA;Acc:NM_001083925]
ENSMUSG00000044921	Rassf9	2.9	10.2	0.77	0.0412013	0.755048	2.9	10.2	0.82	0.0439982	0.746496	10	102512222	102549736	7326	36.64	1	protein_coding	Ras association domain-containing protein 9 [Source:UniProtKB/Swiss-Prot;Acc:Q8K342]
ENSMUSG00000048550	Thnsl1	19.1	38.7	0.77	0.0164945	0.437529	19.1	38.7	0.75	0.035018	0.558837	2	21205724	21215009	4043	41.05	1	protein_coding	threonine synthase-like 1 (bacterial) [Source:MGI Symbol;Acc:MGI:2139347]
ENSMUSG00000063412	Gm10131	87.9	158	0.77	0.000685629	0.0569645	87.9	158	0.76	0.00279608	0.146772	8	34111002	34111737	736	45.92	-1	protein_coding	predicted pseudogene 10131 [Source:MGI Symbol;Acc:MGI:3704308]
ENSMUSG00000095086	Gm25327	6.4	17.4	0.77	0.0412032	0.650216	6.4	17.4	0.86	0.0330759	0.686454	6	120143644	120143750	107	44.86	-1	snRNA	predicted gene, 25327 [Source:MGI Symbol;Acc:MGI:5455104]
ENSMUSG00000104018	4833412K13Rik	2.4	9.1	0.77	0.0400061	0.750303	2.4	9.1	0.8	0.0479045	0.986495	1	78465448	78466926	1479	40.84	-1	TEC	RIKEN cDNA 4833412K13 gene [Source:MGI Symbol;Acc:MGI:1921857]
ENSMUSG00000000142	Axin2	269.5	504.4	0.76	0.00703301	0.236468	269.5	504.4	0.71	0.0160649	0.350903	11	108920349	108950783	5506	53.94	1	protein_coding	Axin-2 [Source:UniProtKB/Swiss-Prot;Acc:O88566]
ENSMUSG00000001288	Rarg	3.2	12	0.76	0.0442069	0.985239	3.2	12	0.85	0.035838	0.700606	15	102234938	102257517	4261	53.53	-1	protein_coding	Retinoic acid receptor gamma [Source:UniProtKB/Swiss-Prot;Acc:P18911]
ENSMUSG00000014592	Camta1	55.6	106.9	0.76	0.0126102	0.309836	55.6	106.9	0.76	0.020669	0.397989	4	150917322	151861876	14570	48.85	-1	protein_coding	Calmodulin-binding transcription activator 1 [Source:UniProtKB/Swiss-Prot;Acc:A2A891]
ENSMUSG00000017493	Igfbp4	213.5	398.6	0.76	0.0065079	0.220257	213.5	398.6	0.65	0.0145222	0.34904	11	99041244	99054392	4416	51.97	1	protein_coding	Insulin-like growth factor-binding protein 4 [Source:UniProtKB/Swiss-Prot;Acc:P47879]
ENSMUSG00000024114	Prss41	21.3	57	0.76	0.0429912	0.537588	21.3	57	0.84	0.0365117	0.519559	17	23836785	23844172	2586	49.61	-1	protein_coding	Serine protease 41 [Source:UniProtKB/Swiss-Prot;Acc:Q920S2]
ENSMUSG00000026121	Sema4c	5.2	13.6	0.76	0.0430298	0.944608	5.2	13.6	0.76	0.0598142	0.808308	1	36548639	36558349	4593	57.48	-1	protein_coding	Semaphorin-4C [Source:UniProtKB/Swiss-Prot;Acc:Q64151]
ENSMUSG00000026429	Ube2t	44.3	92.5	0.76	0.0276996	0.447447	44.3	92.5	0.77	0.0364614	0.536136	1	134962565	134974162	4836	41.99	1	protein_coding	ubiquitin-conjugating enzyme E2T [Source:MGI Symbol;Acc:MGI:1914446]
ENSMUSG00000026605	Cenpf	114.2	234.3	0.76	0.0238959	0.418328	114.2	234.3	0.67	0.0541938	0.60139	1	189640606	189688086	15433	41.15	-1	protein_coding	centromere protein F [Source:MGI Symbol;Acc:MGI:1313302]
ENSMUSG00000031660	Brd7	283.9	506.3	0.76	0.00046929	0.0416104	283.9	506.3	0.72	0.00177268	0.105986	8	88331039	88362194	5244	42.24	-1	protein_coding	Bromodomain-containing protein 7 [Source:UniProtKB/Swiss-Prot;Acc:O88665]
ENSMUSG00000032127	Vps11	45.2	104.7	0.76	0.0382376	0.507594	45.2	104.7	0.81	0.0341945	0.522134	9	44347749	44361670	4940	47.87	-1	protein_coding	VPS11, CORVET/HOPS core subunit [Source:MGI Symbol;Acc:MGI:1918982]
ENSMUSG00000033287	Kctd17	3.9	11.2	0.76	0.046035	0.79882	3.9	11.2	0.69	0.0911257	0.897736	15	78428564	78439303	2541	57.83	1	protein_coding	BTB/POZ domain-containing protein KCTD17 isoform 3 [Source:RefSeq peptide;Acc:NP_001276602]
ENSMUSG00000033970	Rfc3	113.4	210.9	0.76	0.00614826	0.219754	113.4	210.9	0.75	0.00588431	0.215678	5	151642756	151651242	3611	42.91	-1	protein_coding	replication factor C (activator 1) 3 [Source:MGI Symbol;Acc:MGI:1916513]
ENSMUSG00000035275	Raver2	4.4	23.2	0.76	0.0352923	0.617484	4.4	23.2	0.83	0.0375968	0.73992	4	101068983	101152370	6342	44.89	1	protein_coding	Ribonucleoprotein PTB-binding 2 [Source:UniProtKB/Swiss-Prot;Acc:Q7TPD6]
ENSMUSG00000062198	2700097O09Rik	71.6	131.4	0.76	0.00323831	0.149995	71.6	131.4	0.75	0.00788099	0.237477	12	55045661	55080110	5021	41.36	-1	protein_coding	RIKEN cDNA 2700097O09 gene [Source:MGI Symbol;Acc:MGI:1919908]
ENSMUSG00000079139	Gm4204	199.7	387.7	0.76	0.0150779	0.34006	199.7	387.7	0.61	0.0395444	0.522711	1	135231995	135233225	1231	43.87	1	processed_pseudogene	predicted gene 4204 [Source:MGI Symbol;Acc:MGI:3782381]
ENSMUSG00000082253	Gm14639	3.3	10.6	0.76	0.0432372	0.760574	3.3	10.6	0.86	0.0346578	0.710816	X	56155528	56156393	866	48.73	-1	processed_pseudogene	predicted gene 14639 [Source:MGI Symbol;Acc:MGI:3641909]
ENSMUSG00000082844	Gm13537	1.6	8.1	0.76	0.0360599	1	1.6	8.1	0.82	0.0381648	1	2	33323171	33323437	267	50.19	1	processed_pseudogene	predicted gene 13537 [Source:MGI Symbol;Acc:MGI:3651462]
ENSMUSG00000095098	Ccdc85b	4.4	11.7	0.76	0.0436973	0.789098	4.4	11.7	0.73	0.0720782	0.844157	19	5456789	5457397	609	69.46	-1	protein_coding	Coiled-coil domain-containing protein 85B [Source:UniProtKB/Swiss-Prot;Acc:Q6PDY0]
ENSMUSG00000097410	Gm26668	7	18.8	0.76	0.045278	0.700862	7	18.8	0.76	0.0625535	0.825358	11	102863337	103075903	3635	49.01	1	lincRNA	predicted gene, 26668 [Source:MGI Symbol;Acc:MGI:5477162]
ENSMUSG00000104342	Gm36401	15.3	37.6	0.76	0.0400576	0.658365	15.3	37.6	0.83	0.0370774	0.540984	5	45702733	45704760	2028	33.58	1	TEC	predicted gene, 36401 [Source:MGI Symbol;Acc:MGI:5595560]
ENSMUSG00000109841	E330011O21Rik	7.9	22	0.76	0.0448076	0.673015	7.9	22	0.88	0.0291546	0.46688	16	78250861	78302487	2961	42.96	-1	processed_transcript	RIKEN cDNA E330011O21 gene [Source:MGI Symbol;Acc:MGI:3759668]
ENSMUSG00000110187	Gm45496	4.2	19.8	0.76	0.0378194	0.635418	4.2	19.8	1.04	0.0109325	0.466137	8	88560033	88562949	2917	52.14	1	TEC	predicted gene 45496 [Source:MGI Symbol;Acc:MGI:5791332]
ENSMUSG00000113183	Gm47664	11.5	34.1	0.76	0.0440336	0.59361	11.5	34.1	0.92	0.0244337	0.46543	13	20499888	20501227	1340	38.88	1	sense_intronic	predicted gene, 47664 [Source:MGI Symbol;Acc:MGI:6096754]
ENSMUSG00000021451	Sema4d	38.2	69.6	0.75	0.003584	0.188767	38.2	69.6	0.77	0.00734185	0.237477	13	51685529	51793747	7679	50.31	-1	protein_coding	Semaphorin-4D [Source:UniProtKB/Swiss-Prot;Acc:O09126]
ENSMUSG00000022018	Rgcc	59.1	127.5	0.75	0.0353763	0.492451	59.1	127.5	0.76	0.0444943	0.542331	14	79288756	79301645	918	47.24	-1	protein_coding	Regulator of cell cycle RGCC [Source:UniProtKB/Swiss-Prot;Acc:Q9DBX1]
ENSMUSG00000022537	Tmem44	7.2	17.4	0.75	0.0435113	0.686523	7.2	17.4	0.84	0.0323353	0.694863	16	30511855	30550842	8822	48.95	-1	protein_coding	Mus musculus transmembrane protein 44 (Tmem44), transcript variant 3, mRNA. [Source:RefSeq mRNA;Acc:NM_001357413]
ENSMUSG00000022773	Ypel1	6.8	16.5	0.75	0.0444983	0.690647	6.8	16.5	0.7	0.0814011	0.859476	16	17070311	17086688	2659	47.7	1	protein_coding	yippee like 1 [Source:MGI Symbol;Acc:MGI:1913303]
ENSMUSG00000028251	Tstd3	27.5	55.5	0.75	0.0225768	0.407448	27.5	55.5	0.81	0.0165157	0.361451	4	21757382	21767212	1588	40.63	-1	protein_coding	thiosulfate sulfurtransferase (rhodanese)-like domain containing 3 [Source:MGI Symbol;Acc:MGI:1924282]
ENSMUSG00000030614	Tmem126b	51.8	97.1	0.75	0.00695559	0.228787	51.8	97.1	0.81	0.0056017	0.205518	7	90467438	90476001	4740	40.96	-1	protein_coding	Complex I assembly factor TMEM126B, mitochondrial [Source:UniProtKB/Swiss-Prot;Acc:Q9D1R1]
ENSMUSG00000033554	Dph5	60.4	115.6	0.75	0.0125647	0.309836	60.4	115.6	0.86	0.00306338	0.146888	3	115887837	115934361	8027	42.33	1	protein_coding	Diphthine methyl ester synthase [Source:UniProtKB/Swiss-Prot;Acc:Q9CWQ0]
ENSMUSG00000034981	Parm1	59.4	139.8	0.75	0.0440575	0.540807	59.4	139.8	0.56	0.101515	0.717683	5	91517615	91626894	5068	42.94	1	protein_coding	Prostate androgen-regulated mucin-like [Source:UniProtKB/Swiss-Prot;Acc:Q923D3]
ENSMUSG00000036110	Slc17a2	1.5	8	0.75	0.0366668	1	1.5	8	0.7	0.0681466	1	13	23806993	23825180	5956	40.74	1	protein_coding	solute carrier family 17 (sodium phosphate), member 2 [Source:MGI Symbol;Acc:MGI:2443098]
ENSMUSG00000037405	Icam1	1.3	8.6	0.75	0.0317985	1	1.3	8.6	0.7	0.0622689	1	9	21015985	21028817	4360	50.61	1	protein_coding	intercellular adhesion molecule 1 [Source:MGI Symbol;Acc:MGI:96392]
ENSMUSG00000040997	Abhd4	58.8	118.2	0.75	0.0229848	0.412928	58.8	118.2	0.77	0.0288711	0.46543	14	54254188	54270637	3279	46.92	1	protein_coding	abhydrolase domain containing 4 [Source:MGI Symbol;Acc:MGI:1915938]
ENSMUSG00000065701	Rny1	3.5	11.7	0.75	0.0463443	0.782865	3.5	11.7	0.78	0.0564855	0.800269	6	47788069	47788180	112	43.75	-1	misc_RNA	RNA, Y1 small cytoplasmic, Ro-associated [Source:MGI Symbol;Acc:MGI:97995]
ENSMUSG00000001870	Ltbp1	4.9	14.9	0.74	0.0500536	0.958158	4.9	14.9	0.64	0.116885	0.940294	17	75005568	75392512	10480	42.66	1	protein_coding	Latent-transforming growth factor beta-binding protein 1 [Source:UniProtKB/Swiss-Prot;Acc:Q8CG19]
ENSMUSG00000002688	Prkd1	0.5	12.3	0.74	0.019951	0.632143	0.5	12.3	0.95	0.00980318	0.740787	12	50341231	50649098	3653	39.21	-1	protein_coding	protein kinase D1 [Source:MGI Symbol;Acc:MGI:99879]
ENSMUSG00000002808	Epdr1	4.8	24.9	0.74	0.0385717	0.65146	4.8	24.9	0.77	0.0493123	0.591787	13	19591706	19619927	2745	40.58	-1	protein_coding	Mammalian ependymin-related protein 1 [Source:UniProtKB/Swiss-Prot;Acc:Q99M71]
ENSMUSG00000004561	Mettl17	54.2	98.6	0.74	0.00418104	0.173223	54.2	98.6	0.86	0.00145779	0.0984499	14	51884842	51893039	3970	47.32	1	protein_coding	Methyltransferase-like protein 17, mitochondrial [Source:UniProtKB/Swiss-Prot;Acc:Q3U2U7]
ENSMUSG00000020696	Rffl	19.5	50.2	0.74	0.0504025	0.583057	19.5	50.2	0.81	0.0421179	0.548378	11	82802449	82871210	5922	46.3	-1	protein_coding	E3 ubiquitin-protein ligase rififylin [Source:UniProtKB/Swiss-Prot;Acc:Q6ZQM0]
ENSMUSG00000021193	Pitrm1	47.4	87.6	0.74	0.0118646	0.29933	47.4	87.6	0.75	0.018562	0.396475	13	6548149	6580515	4787	45.18	1	protein_coding	Presequence protease, mitochondrial [Source:UniProtKB/Swiss-Prot;Acc:Q8K411]
ENSMUSG00000022724	Riox2	18.5	45.7	0.74	0.0492556	0.698415	18.5	45.7	0.81	0.0432444	0.574964	16	59471775	59492461	5290	43.72	1	protein_coding	ribosomal oxygenase 2 [Source:MGI Symbol;Acc:MGI:1914264]
ENSMUSG00000022974	Paxbp1	85.9	157.9	0.74	0.00605851	0.21676	85.9	157.9	0.77	0.00769674	0.247628	16	91014037	91044543	5508	42.27	-1	protein_coding	PAX3- and PAX7-binding protein 1 [Source:UniProtKB/Swiss-Prot;Acc:P58501]
ENSMUSG00000024697	Gna14	5.5	20.4	0.74	0.0465199	0.946541	5.5	20.4	0.81	0.0458109	0.752748	19	16435667	16610818	3383	43.6	1	protein_coding	guanine nucleotide binding protein, alpha 14 [Source:MGI Symbol;Acc:MGI:95769]
ENSMUSG00000027376	Prom2	2.2	9.7	0.74	0.0419486	0.758421	2.2	9.7	0.69	0.0794358	0.862245	2	127526473	127541467	5187	53.36	-1	protein_coding	Prominin-2 [Source:UniProtKB/Swiss-Prot;Acc:Q3UUY6]
ENSMUSG00000031342	Gpm6b	2.6	9.3	0.74	0.0478609	0.786594	2.6	9.3	0.68	0.0893955	0.889363	X	166238911	166388988	5600	41.79	1	protein_coding	glycoprotein m6b [Source:MGI Symbol;Acc:MGI:107672]
ENSMUSG00000033917	Gde1	66.2	137.9	0.74	0.0315456	0.471924	66.2	137.9	0.85	0.0151716	0.342423	7	118688545	118705778	1692	46.61	-1	protein_coding	Glycerophosphodiester phosphodiesterase 1 [Source:UniProtKB/Swiss-Prot;Acc:Q9JL56]
ENSMUSG00000035439	Haus8	23	57.1	0.74	0.0469304	0.566125	23	57.1	0.86	0.0283922	0.471341	8	71248561	71272934	5278	48.1	-1	protein_coding	HAUS augmin-like complex subunit 8 [Source:UniProtKB/Swiss-Prot;Acc:Q99L00]
ENSMUSG00000036885	Arhgef26	217.7	383.6	0.74	0.00154736	0.0974279	217.7	383.6	0.68	0.00569385	0.205518	3	62338344	62462221	10116	41.76	1	protein_coding	Rho guanine nucleotide exchange factor (GEF) 26 [Source:MGI Symbol;Acc:MGI:1918053]
ENSMUSG00000037188	Grhl3	0.5	7.5	0.74	0.0236566	1	0.5	7.5	0.74	0.0380137	1	4	135541888	135573630	2789	52.39	-1	protein_coding	Grainyhead-like [Source:UniProtKB/Swiss-Prot;Acc:Q5FWH3]
ENSMUSG00000039427	Alg1	7.7	24.2	0.74	0.050599	0.690647	7.7	24.2	0.89	0.0279201	0.478809	16	5233621	5244912	2682	50.48	1	protein_coding	Chitobiosyldiphosphodolichol beta-mannosyltransferase [Source:UniProtKB/Swiss-Prot;Acc:Q921Q3]
ENSMUSG00000046470	Sox18	0.8	17.6	0.74	0.020737	0.530086	0.8	17.6	0.81	0.0230394	0.621605	2	181669836	181671640	1620	61.11	-1	protein_coding	Transcription factor SOX-18 [Source:UniProtKB/Swiss-Prot;Acc:P43680]
ENSMUSG00000053164	Gpr21	11.8	25.3	0.74	0.0384365	0.633296	11.8	25.3	0.76	0.0516702	0.622079	2	37516332	37520603	3733	42.02	1	protein_coding	Probable G-protein coupled receptor 21 [Source:UniProtKB/Swiss-Prot;Acc:Q8BX79]
ENSMUSG00000053550	Shisa7	9.6	31.5	0.74	0.0500306	0.690647	9.6	31.5	0.88	0.0310346	0.499551	7	4825552	4844696	6639	52.04	-1	protein_coding	Protein shisa-7 [Source:UniProtKB/Swiss-Prot;Acc:Q8C3Q5]
ENSMUSG00000054200	Ffar4	22.4	45.7	0.74	0.0276679	0.544996	22.4	45.7	0.82	0.0209319	0.434776	19	38097079	38114263	1393	47.19	1	protein_coding	Free fatty acid receptor 4 [Source:UniProtKB/Swiss-Prot;Acc:Q7TMA4]
ENSMUSG00000058174	Gm5148	3.6	11.3	0.74	0.0498079	0.990501	3.6	11.3	0.76	0.0618189	0.822222	3	37714190	37724490	3901	45.89	-1	protein_coding
ENSMUSG00000071369	Map3k5	32.2	62	0.74	0.0160692	0.352647	32.2	62	0.8	0.0140318	0.361788	10	19934472	20142753	6086	43.75	1	protein_coding	Mitogen-activated protein kinase kinase kinase 5 [Source:UniProtKB/Swiss-Prot;Acc:O35099]
ENSMUSG00000085903	Gm15340	14.4	36.2	0.74	0.0485441	0.679735	14.4	36.2	0.78	0.0524906	0.639934	16	95900398	95901728	704	45.23	1	lincRNA	predicted gene 15340 [Source:MGI Symbol;Acc:MGI:3705158]
ENSMUSG00000086003	B230206L02Rik	1.4	6.7	0.74	0.0412908	1	1.4	6.7	0.75	0.0555135	1	11	94133485	94155776	1042	51.64	1	processed_transcript	RIKEN cDNA B230206L02 gene [Source:MGI Symbol;Acc:MGI:1924598]
ENSMUSG00000102997	Gm17244	0.3	10.8	0.74	0.019293	0.597598	0.3	10.8	0.87	0.0147478	1	4	123113349	123116764	3416	57.03	-1	TEC	predicted gene, 17244 [Source:MGI Symbol;Acc:MGI:4936878]
ENSMUSG00000002985	Apoe	8.8	24.4	0.73	0.0535046	0.69961	8.8	24.4	0.93	0.0182646	0.382367	7	19696109	19699188	2138	54.64	-1	protein_coding	Apolipoprotein E [Source:UniProtKB/Swiss-Prot;Acc:P08226]
ENSMUSG00000021482	Aaed1	114.3	203.6	0.73	0.00257048	0.132072	114.3	203.6	0.8	0.000968902	0.0745678	13	64275280	64312710	3850	44.68	-1	protein_coding	AhpC/TSA antioxidant enzyme domain containing 1 [Source:MGI Symbol;Acc:MGI:1913379]
ENSMUSG00000021756	Il6st	56.7	107.7	0.73	0.0167561	0.360329	56.7	107.7	0.76	0.0202193	0.426057	13	112464070	112510086	11099	43.3	1	protein_coding	Interleukin-6 receptor subunit beta [Source:UniProtKB/Swiss-Prot;Acc:Q00560]
ENSMUSG00000022010	Tsc22d1	335.7	582.1	0.73	0.000403813	0.0379667	335.7	582.1	0.74	0.000986452	0.0724793	14	76414961	76507765	8994	45.05	1	protein_coding	TSC22 domain family, member 1 [Source:MGI Symbol;Acc:MGI:109127]
ENSMUSG00000022512	Cldn1	4	30.2	0.73	0.0338409	0.597598	4	30.2	0.85	0.0278472	0.495663	16	26356642	26371841	3247	40.12	-1	protein_coding	Claudin-1 [Source:UniProtKB/Swiss-Prot;Acc:O88551]
ENSMUSG00000026494	Kif26b	15.7	30.6	0.73	0.0299375	0.577081	15.7	30.6	0.68	0.0639919	0.639934	1	178529125	178939200	14696	45.33	1	protein_coding	Kinesin-like protein KIF26B [Source:UniProtKB/Swiss-Prot;Acc:Q7TNC6]
ENSMUSG00000026548	Slamf9	4.8	19.9	0.73	0.047148	0.679076	4.8	19.9	0.76	0.0567339	0.808197	1	172475358	172478575	1313	47.23	1	protein_coding	SLAM family member 9 [Source:MGI Symbol;Acc:MGI:1923692]
ENSMUSG00000026822	Lcn2	5.4	68.9	0.73	0.0262047	0.432714	5.4	68.9	0.75	0.0412826	0.604391	2	32384633	32388252	2623	54.7	-1	protein_coding	Neutrophil gelatinase-associated lipocalin [Source:UniProtKB/Swiss-Prot;Acc:P11672]
ENSMUSG00000027649	Ctnnbl1	33.6	66.1	0.73	0.0236904	0.412928	33.6	66.1	0.83	0.0121618	0.338871	2	157737401	157891614	2705	46.92	1	protein_coding	Beta-catenin-like protein 1 [Source:UniProtKB/Swiss-Prot;Acc:Q9CWL8]
ENSMUSG00000034121	Mks1	12.9	35.9	0.73	0.0544308	0.716298	12.9	35.9	1	0.0112782	0.350615	11	87853215	87863803	4044	50.33	1	protein_coding	Meckel syndrome type 1 protein homolog [Source:UniProtKB/Swiss-Prot;Acc:Q5SW45]
ENSMUSG00000039178	Tbc1d19	40.8	81	0.73	0.0253548	0.425671	40.8	81	0.9	0.00642094	0.237477	5	53809606	53903965	3117	40.02	1	protein_coding	TBC1 domain family member 19 [Source:HGNC Symbol;Acc:HGNC:25624]
ENSMUSG00000040034	Nup43	60.1	124.8	0.73	0.0352146	0.491689	60.1	124.8	0.79	0.0288442	0.46543	10	7667503	7678881	2560	41.75	1	protein_coding	Nucleoporin Nup43 [Source:UniProtKB/Swiss-Prot;Acc:P59235]
ENSMUSG00000046157	Tmem229b	13.9	27.4	0.73	0.0302722	0.596063	13.9	27.4	0.68	0.0583647	0.658279	12	78961795	79007627	4732	47.51	-1	protein_coding	Transmembrane protein 229B [Source:UniProtKB/Swiss-Prot;Acc:Q8BFQ2]
ENSMUSG00000054648	Zfp869	11.6	27	0.73	0.0495796	0.622549	11.6	27	0.78	0.0492842	0.642509	8	69706332	69710724	1590	42.66	-1	protein_coding	zinc finger protein 869 [Source:MGI Symbol;Acc:MGI:1914119]
ENSMUSG00000068893	Sprr2a2	3.9	87.2	0.73	0.0210846	0.397521	3.9	87.2	0.77	0.0279345	0.46543	3	92215920	92256724	2910	39.08	1	protein_coding	small proline-rich protein 2A2 [Source:MGI Symbol;Acc:MGI:3845026]
ENSMUSG00000072244	Trim6	5.2	14.9	0.73	0.0553623	0.704276	5.2	14.9	0.73	0.0733105	0.857099	7	104218793	104235152	4894	44.12	1	protein_coding	Tripartite motif-containing protein 6 [Source:UniProtKB/Swiss-Prot;Acc:Q8BGE7]
ENSMUSG00000085702	Mecomos	22.6	45.4	0.73	0.0269309	0.502918	22.6	45.4	0.74	0.0408072	0.542633	3	30012379	30054808	6253	41.16	1	antisense	MDS1 and EVI1 complex locus, opposite strand [Source:MGI Symbol;Acc:MGI:4439646]
ENSMUSG00000096403	Gm9825	23.8	48.7	0.73	0.0308384	0.468953	23.8	48.7	0.81	0.0225133	0.454899	6	7982541	7983383	843	55.63	-1	processed_pseudogene	predicted gene 9825 [Source:MGI Symbol;Acc:MGI:3708729]
ENSMUSG00000102029	Gm29530	0.3	7.5	0.73	0.0227136	1	0.3	7.5	0.85	0.0180509	1	12	83063392	83098874	1956	45.39	-1	antisense	predicted gene 29530 [Source:MGI Symbol;Acc:MGI:5580236]
ENSMUSG00000103009	Gm4430	0.5	4.3	0.73	0.0314325	1	0.5	4.3	0.69	0.0558	1	2	129197252	129199194	1943	55.22	-1	TEC	predicted gene 4430 [Source:MGI Symbol;Acc:MGI:3782614]
ENSMUSG00000103509	Gm38372	4.8	15	0.73	0.0542456	0.704969	4.8	15	0.78	0.0564087	0.800269	1	7148110	7152137	4028	37.54	1	TEC	predicted gene, 38372 [Source:MGI Symbol;Acc:MGI:5611600]
ENSMUSG00000104293	Gm38043	7	17.6	0.73	0.0519373	0.729031	7	17.6	0.9	0.0224097	0.631221	1	156583108	156588248	5141	42.17	1	TEC	predicted gene, 38043 [Source:MGI Symbol;Acc:MGI:5611271]
ENSMUSG00000107369	Gstm2-ps1	28.2	58.4	0.73	0.0376252	0.502978	28.2	58.4	0.72	0.0558438	0.622456	5	116632908	116633564	657	51.14	-1	processed_pseudogene	glutathione S-transferase mu 2 (muscle), pseudogene 1 [Source:MGI Symbol;Acc:MGI:3648223]
ENSMUSG00000021713	Ppwd1	33.2	60.7	0.72	0.0100517	0.275153	33.2	60.7	0.7	0.0248087	0.46543	13	104205124	104228843	5880	36.19	-1	protein_coding	Peptidylprolyl isomerase domain and WD repeat-containing protein 1 [Source:UniProtKB/Swiss-Prot;Acc:Q8CEC6]
ENSMUSG00000024349	Tmem173	62.2	113	0.72	0.0121296	0.302893	62.2	113	0.63	0.0347542	0.49251	18	35733678	35740554	2302	50.02	-1	protein_coding	Stimulator of interferons protein [Source:UniProtKB/Swiss-Prot;Acc:Q3TBT3]
ENSMUSG00000026787	Gad2	2.2	11.6	0.72	0.0433685	0.765092	2.2	11.6	0.74	0.0550671	0.798294	2	22622205	22693874	5876	41.26	1	protein_coding	glutamic acid decarboxylase 2 [Source:MGI Symbol;Acc:MGI:95634]
ENSMUSG00000027430	Dtd1	53.2	98.7	0.72	0.0135774	0.325114	53.2	98.7	0.75	0.0167612	0.362291	2	144599897	144768758	2353	44.16	1	protein_coding	D-aminoacyl-tRNA deacylase 1 [Source:UniProtKB/Swiss-Prot;Acc:Q9DD18]
ENSMUSG00000029312	Klhl8	24	52.2	0.72	0.0500613	0.577081	24	52.2	0.7	0.07448	0.658279	5	103861973	103911259	3489	44.13	-1	protein_coding	Kelch-like protein 8 [Source:UniProtKB/Swiss-Prot;Acc:P59280]
ENSMUSG00000029378	Mcub	18.9	38.4	0.72	0.0349711	0.632143	18.9	38.4	0.72	0.0546924	0.646047	5	91139599	91148432	1215	40.83	1	protein_coding	amphiregulin [Source:MGI Symbol;Acc:MGI:88068]
ENSMUSG00000035376	Hacd2	50.4	93.6	0.72	0.0187461	0.377157	50.4	93.6	0.59	0.0394933	0.550727	16	35022421	35109175	3603	43.19	1	protein_coding	Very-long-chain (3R)-3-hydroxyacyl-CoA dehydratase 2 [Source:UniProtKB/Swiss-Prot;Acc:Q9D3B1]
ENSMUSG00000035671	Zswim4	9.6	21.5	0.72	0.0483189	0.617484	9.6	21.5	0.88	0.0205667	0.46543	8	84210678	84237055	4625	51.41	-1	protein_coding	zinc finger SWIM-type containing 4 [Source:MGI Symbol;Acc:MGI:2443726]
ENSMUSG00000040852	Plekhh2	2	9.8	0.72	0.0449489	0.793623	2	9.8	0.71	0.0681033	1	17	84511895	84622142	6886	42.93	1	protein_coding	Mus musculus pleckstrin homology domain containing, family H (with MyTH4 domain) member 2 (Plekhh2), transcript variant 2, mRNA. [Source:RefSeq mRNA;Acc:NM_001357986]
ENSMUSG00000046223	Plaur	1.2	5.9	0.72	0.0449209	1	1.2	5.9	0.67	0.0795426	1	7	24462484	24475968	2617	49.97	1	protein_coding	plasminogen activator, urokinase receptor [Source:MGI Symbol;Acc:MGI:97612]
ENSMUSG00000046380	Jrk	7.4	17.2	0.72	0.0522121	0.731863	7.4	17.2	0.7	0.080882	0.8656	15	74702301	74709535	5853	53.57	-1	protein_coding	Jerky protein [Source:UniProtKB/Swiss-Prot;Acc:Q60976]
ENSMUSG00000050335	Lgals3	105	213.6	0.72	0.036648	0.49825	105	213.6	0.73	0.0476301	0.552936	14	47367751	47386160	1858	46.72	1	protein_coding	galectin 3 [Source:HGNC Symbol;Acc:HGNC:6563]
ENSMUSG00000055653	Gpc3	1.5	7.6	0.72	0.0423183	1	1.5	7.6	0.71	0.064081	1	X	52272426	52613950	2690	39.67	-1	protein_coding	glypican 3 [Source:MGI Symbol;Acc:MGI:104903]
ENSMUSG00000062248	Cks2	42.4	78.3	0.72	0.016962	0.362619	42.4	78.3	0.61	0.035598	0.497188	13	51645232	51650660	692	41.67	1	protein_coding	Cyclin-dependent kinases regulatory subunit 2 [Source:UniProtKB/Swiss-Prot;Acc:P56390]
ENSMUSG00000063851	Rnf183	0.3	5.1	0.72	0.0261675	1	0.3	5.1	0.71	0.0409443	1	4	62427540	62435252	1524	47.15	-1	protein_coding	Probable E3 ubiquitin-protein ligase RNF183 [Source:UniProtKB/Swiss-Prot;Acc:Q8QZS5]
ENSMUSG00000085316	D330050G23Rik	1.6	6.4	0.72	0.0496739	1	1.6	6.4	0.7	0.0739952	1	2	116900152	116912791	2326	45.1	1	lincRNA	RIKEN cDNA D330050G23 gene [Source:MGI Symbol;Acc:MGI:2445155]
ENSMUSG00000097651	4930461G14Rik	0.3	11.1	0.72	0.021409	0.631203	0.3	11.1	0.79	0.023278	0.646378	9	58455122	58469635	843	48.63	1	lincRNA	RIKEN cDNA 4930461G14 gene [Source:MGI Symbol;Acc:MGI:1922129]
ENSMUSG00000102758	Naaladl2	81.9	148.9	0.72	0.00961398	0.271282	81.9	148.9	0.71	0.0180115	0.372442	3	23798102	25144261	10411	36.79	-1	protein_coding	N-acetylated alpha-linked acidic dipeptidase like 2 [Source:HGNC Symbol;Acc:HGNC:23219]
ENSMUSG00000105161	Gm42595	16.4	40.5	0.72	0.0547242	0.671728	16.4	40.5	0.86	0.0295197	0.492613	5	110661392	110662998	1607	41.82	1	lincRNA	predicted gene 42595 [Source:MGI Symbol;Acc:MGI:5662732]
ENSMUSG00000112290	Gm33782	0	5.4	0.72	0.0191598	1	0	5.4	0.72	0.0298167	1	10	96310131	96362367	517	40.79	1	lincRNA	predicted gene, 33782 [Source:MGI Symbol;Acc:MGI:5592941]
ENSMUSG00000002325	Irf9	129.5	226.3	0.71	0.00458428	0.181532	129.5	226.3	0.61	0.0185302	0.37735	14	55603571	55610030	5386	50.48	1	protein_coding	Interferon regulatory factor 9 [Source:UniProtKB/Swiss-Prot;Acc:Q61179]
ENSMUSG00000022456	Sept3	2.8	16.3	0.71	0.0421335	0.690647	2.8	16.3	0.83	0.0324917	0.681409	15	82274893	82294574	6620	49.6	1	protein_coding	Neuronal-specific septin-3 [Source:UniProtKB/Swiss-Prot;Acc:Q9Z1S5]
ENSMUSG00000024883	Rin1	1.9	8.6	0.71	0.0528723	1	1.9	8.6	0.75	0.0580037	1	19	5050481	5057071	4792	56.88	1	protein_coding	Ras and Rab interactor 1 [Source:UniProtKB/Swiss-Prot;Acc:Q921Q7]
ENSMUSG00000027715	Ccna2	138.3	247.3	0.71	0.0094191	0.268653	138.3	247.3	0.68	0.0184679	0.375177	3	36564865	36572150	4083	43.96	-1	protein_coding	Cyclin-A2 [Source:UniProtKB/Swiss-Prot;Acc:P51943]
ENSMUSG00000029650	Slc46a3	14.7	33.3	0.71	0.0519474	0.690647	14.7	33.3	0.74	0.0614722	0.68086	5	147878437	147894815	2458	46.68	-1	protein_coding	Solute carrier family 46 member 3 [Source:UniProtKB/Swiss-Prot;Acc:Q9DC26]
ENSMUSG00000030342	Cd9	565.5	968.6	0.71	0.00111741	0.0769118	565.5	968.6	0.72	0.00194321	0.109308	6	125460266	125494791	2044	50.16	-1	protein_coding	CD9 antigen [Source:UniProtKB/Swiss-Prot;Acc:P40240]
ENSMUSG00000031150	Ccdc120	22.7	49.4	0.71	0.0507075	0.584166	22.7	49.4	0.72	0.0659207	0.692191	X	7731714	7750905	4165	50.06	-1	protein_coding	Coiled-coil domain-containing protein 120 [Source:UniProtKB/Swiss-Prot;Acc:A2AEV7]
ENSMUSG00000031756	Cenpn	11.3	25.7	0.71	0.0542643	0.704969	11.3	25.7	0.77	0.0530296	0.64209	8	116921730	116941507	3294	48.07	1	protein_coding	Centromere protein N [Source:UniProtKB/Swiss-Prot;Acc:Q9CZW2]
ENSMUSG00000034401	Spata6	10.3	27.7	0.71	0.0628169	0.744362	10.3	27.7	0.73	0.0752507	0.664263	4	111719984	111829184	5616	37.96	1	protein_coding	Spermatosis-associated protein 6 [Source:UniProtKB/Swiss-Prot;Acc:Q3U6K5]
ENSMUSG00000041540	Sox5	4.2	12.1	0.71	0.0593952	0.831195	4.2	12.1	0.69	0.0901647	0.881077	6	143828425	144781977	14376	42.75	-1	protein_coding	SRY (sex determining region Y)-box 5 [Source:MGI Symbol;Acc:MGI:98367]
ENSMUSG00000041794	Myrip	48.6	95.4	0.71	0.0310535	0.466795	48.6	95.4	0.77	0.0219596	0.411095	9	120301513	120474841	5537	47.28	1	protein_coding	Rab effector MyRIP [Source:UniProtKB/Swiss-Prot;Acc:Q8K3I4]
ENSMUSG00000042357	Gjb5	0.2	8.3	0.71	0.0237667	1	0.2	8.3	0.73	0.0327344	1	4	127354809	127358181	1721	52.62	-1	protein_coding	gap junction protein, beta 5 [Source:MGI Symbol;Acc:MGI:95723]
ENSMUSG00000051220	Ercc6l	17.5	35.1	0.71	0.0401952	0.598895	17.5	35.1	0.66	0.0661354	0.655575	X	102141716	102157091	5302	42.83	-1	protein_coding	DNA excision repair protein ERCC-6-like [Source:UniProtKB/Swiss-Prot;Acc:Q8BHK9]
ENSMUSG00000051811	Cox6b2	7.2	16.9	0.71	0.0579356	0.713548	7.2	16.9	0.72	0.0749293	0.859476	7	4751792	4753094	1108	58.71	-1	protein_coding	Cytochrome c oxidase subunit 6B2 [Source:UniProtKB/Swiss-Prot;Acc:Q80ZN9]
ENSMUSG00000053414	Hunk	40.1	74.5	0.71	0.0214043	0.399852	40.1	74.5	0.65	0.0462962	0.55826	16	90386397	90499553	5009	47.46	1	protein_coding	Hormonally up-regulated neu tumor-associated kinase [Source:UniProtKB/Swiss-Prot;Acc:O88866]
ENSMUSG00000094530	Gm21399	533.4	906.8	0.71	0.00029524	0.0313044	533.4	906.8	0.67	0.00109458	0.0776348	8	129252998	129253594	597	42.21	1	processed_pseudogene	predicted gene, 21399 [Source:MGI Symbol;Acc:MGI:5434754]
ENSMUSG00000097709	2810429I04Rik	3	10	0.71	0.0575948	0.993017	3	10	0.74	0.0661357	0.84261	13	3478230	3501393	8789	40.5	1	lincRNA	RIKEN cDNA 2810429I04 gene [Source:MGI Symbol;Acc:MGI:1924187]
ENSMUSG00000000751	Rpa1	73.6	132.5	0.7	0.0137108	0.326391	73.6	132.5	0.71	0.0193426	0.3948	11	75298166	75348324	5578	44.89	-1	protein_coding	Replication protein A 70 kDa DNA-binding subunit [Source:UniProtKB/Swiss-Prot;Acc:Q8VEE4]
ENSMUSG00000006398	Cdc20	20.7	39.5	0.7	0.0380875	0.509963	20.7	39.5	0.64	0.0810982	0.677704	4	118432901	118437352	1868	50.97	-1	protein_coding	Cell division cycle [Source:UniProtKB/Swiss-Prot;Acc:Q9JJ66]
ENSMUSG00000021196	Pfkp	110.7	194.7	0.7	0.00487844	0.187817	110.7	194.7	0.78	0.00172126	0.104744	13	6579768	6648777	13401	46.03	-1	protein_coding	ATP-dependent 6-phosphofructokinase, platelet type [Source:UniProtKB/Swiss-Prot;Acc:Q9WUA3]
ENSMUSG00000022177	Haus4	20.5	42.5	0.7	0.0489704	0.680091	20.5	42.5	0.76	0.0474434	0.562248	14	54541785	54554616	2378	49.83	-1	protein_coding	HAUS augmin-like complex subunit 4 [Source:UniProtKB/Swiss-Prot;Acc:Q8BFT2]
ENSMUSG00000026283	Ing5	58	102.4	0.7	0.007282	0.235721	58	102.4	0.81	0.0013977	0.0971313	1	93803965	93822101	4729	48.17	1	protein_coding	Inhibitor of growth protein 5 [Source:UniProtKB/Swiss-Prot;Acc:Q9D8Y8]
ENSMUSG00000026478	Lamc1	29	52.9	0.7	0.0153697	0.348683	29	52.9	0.7	0.0286336	0.46543	1	153218922	153332786	8272	44.38	-1	protein_coding	laminin subunit gamma 1 [Source:HGNC Symbol;Acc:HGNC:6492]
ENSMUSG00000027243	Harbi1	58.7	126.5	0.7	0.0533716	0.59343	58.7	126.5	0.97	0.0040207	0.173622	2	91710852	91721545	5588	43.9	1	protein_coding	Mus musculus harbinger transposase derived 1 (Harbi1), transcript variant 3, mRNA. [Source:RefSeq mRNA;Acc:NM_001356519]
ENSMUSG00000028718	Stil	25.3	52	0.7	0.0449883	0.553339	25.3	52	0.78	0.0346987	0.5064	4	115000159	115043196	5795	40.24	1	protein_coding	SCL-interrupting locus protein homolog isoform 5 [Source:RefSeq peptide;Acc:NP_001291482]
ENSMUSG00000031119	Gpc4	57.7	101.3	0.7	0.0074373	0.236468	57.7	101.3	0.67	0.0179938	0.372442	X	52053021	52165252	2651	41.28	-1	protein_coding	glypican 4 [Source:MGI Symbol;Acc:MGI:104902]
ENSMUSG00000035765	Dym	73.7	148.7	0.7	0.0420172	0.530086	73.7	148.7	0.79	0.0203735	0.415212	18	75018772	75286966	2471	45.51	1	protein_coding	Dymeclin [Source:UniProtKB/Swiss-Prot;Acc:Q8CHY3]
ENSMUSG00000038379	Ttk	50.5	95.2	0.7	0.0256723	0.428549	50.5	95.2	0.72	0.0353552	0.499551	9	83834689	83872389	4919	39.55	1	protein_coding	Ttk protein kinase [Source:MGI Symbol;Acc:MGI:1194921]
ENSMUSG00000042447	Mios	49.5	107.4	0.7	0.0529456	0.59466	49.5	107.4	0.8	0.031406	0.473121	6	8209222	8236274	6552	38.53	1	protein_coding	GATOR complex protein MIOS [Source:UniProtKB/Swiss-Prot;Acc:Q8VE19]
ENSMUSG00000042680	Garem1	22	45.4	0.7	0.0445156	0.68156	22	45.4	0.84	0.0229034	0.426057	18	21127201	21300138	4923	42.89	-1	protein_coding	GRB2-associated and regulator of MAPK protein [Source:UniProtKB/Swiss-Prot;Acc:Q3UFT3]
ENSMUSG00000048164	Gm7204	251.7	421.9	0.7	0.000382029	0.0370992	251.7	421.9	0.66	0.00174116	0.102809	16	48218605	48219204	600	42.67	1	processed_pseudogene	predicted pseudogene 7204 [Source:MGI Symbol;Acc:MGI:3645884]
ENSMUSG00000048261	Gm4879	26.2	49.6	0.7	0.0258489	0.430323	26.2	49.6	0.76	0.022122	0.428653	7	13178903	13180174	1272	45.6	1	processed_pseudogene	predicted pseudogene 4879 [Source:MGI Symbol;Acc:MGI:3648111]
ENSMUSG00000048424	Ranbp3l	1.3	12.5	0.7	0.0350109	0.740392	1.3	12.5	0.8	0.0318587	0.945769	15	8967949	9067335	6855	40.25	1	protein_coding	Ran-binding protein 3-like [Source:UniProtKB/Swiss-Prot;Acc:Q6PDH4]
ENSMUSG00000051209	Gpr119	6	68.5	0.7	0.0317285	0.606787	6	68.5	1.76	1.6598e-05	0.00350256	X	48667979	48674478	2269	41.34	-1	protein_coding	G-protein coupled receptor 119 [Source:MGI Symbol;Acc:MGI:2668412]
ENSMUSG00000062170	Fmr1nb	1.9	11.1	0.7	0.0441736	0.769401	1.9	11.1	0.72	0.0564782	0.812246	X	68761839	68804567	937	39.32	1	protein_coding	Fragile X mental retardation 1 neighbor protein [Source:UniProtKB/Swiss-Prot;Acc:Q80ZA7]
ENSMUSG00000078922	Tgtp1	1.2	52	0.7	0.0230765	0.471924	1.2	52	1.66	4.81968e-05	0.00790542	11	48985327	48994172	3205	44.39	-1	protein_coding	T-cell-specific guanine nucleotide triphosphate-binding protein 1 [Source:UniProtKB/Swiss-Prot;Acc:Q62293]
ENSMUSG00000081451	Gm12734	27.6	54.7	0.7	0.0386058	0.50958	27.6	54.7	0.74	0.0397488	0.526852	11	77542133	77543080	948	40.72	1	processed_pseudogene	predicted gene 12734 [Source:MGI Symbol;Acc:MGI:3650213]
ENSMUSG00000081470	Gm14131	5	14.8	0.7	0.0634104	0.755205	5	14.8	0.78	0.0553236	0.79925	2	149356687	149357405	719	48.4	1	processed_pseudogene	predicted gene 14131 [Source:MGI Symbol;Acc:MGI:3652215]
ENSMUSG00000081917	Gm15209	1.2	5.4	0.7	0.0551341	1	1.2	5.4	0.71	0.0687145	1	X	162894755	162895154	400	47	-1	processed_pseudogene	predicted gene 15209 [Source:MGI Symbol;Acc:MGI:3705716]
ENSMUSG00000085287	4833418N02Rik	19.8	38.6	0.7	0.03706	0.643324	19.8	38.6	0.76	0.0322011	0.495663	17	87274886	87282814	2762	47.16	-1	lincRNA	RIKEN cDNA 4833418N02 gene [Source:MGI Symbol;Acc:MGI:1921847]
ENSMUSG00000099397	Gm7809	18.2	34.9	0.7	0.0274139	0.438501	18.2	34.9	0.76	0.0292857	0.499847	17	21967501	21968242	742	51.75	-1	processed_pseudogene	predicted gene 7809 [Source:MGI Symbol;Acc:MGI:3643362]
ENSMUSG00000114380	Gm47942	19.7	37.2	0.7	0.0269612	0.437529	19.7	37.2	0.7	0.0463659	0.630477	13	58668624	58668839	216	59.72	-1	processed_pseudogene	predicted gene, 47942 [Source:MGI Symbol;Acc:MGI:6097208]
ENSMUSG00000002320	Tm9sf1	30.5	63.1	0.69	0.0529007	0.590595	30.5	63.1	0.75	0.0460602	0.546704	14	55635965	55643806	3880	48.75	-1	protein_coding	Transmembrane 9 superfamily member 1 [Source:UniProtKB/Swiss-Prot;Acc:Q9DBU0]
ENSMUSG00000012443	Kif11	93.5	189.7	0.69	0.0499397	0.577081	93.5	189.7	0.69	0.0636322	0.635058	19	37376403	37421859	4819	40.53	1	protein_coding	Kinesin-like protein KIF11 [Source:UniProtKB/Swiss-Prot;Acc:Q6P9P6]
ENSMUSG00000014813	Stc1	0.2	7.9	0.69	0.0259815	1	0.2	7.9	0.77	0.0275456	1	14	69029238	69041804	4197	44.19	1	protein_coding	stanniocalcin 1 [Source:MGI Symbol;Acc:MGI:109131]
ENSMUSG00000020698	Cct6b	2.2	7.9	0.69	0.0618711	1	2.2	7.9	0.68	0.0881767	1	11	82719250	82764321	1871	42.81	-1	protein_coding	chaperonin containing Tcp1, subunit 6b (zeta) [Source:MGI Symbol;Acc:MGI:1329013]
ENSMUSG00000020956	Dtd2	43.7	76.5	0.69	0.010846	0.286237	43.7	76.5	0.64	0.0280284	0.46543	12	51988312	52006501	3108	43.61	-1	protein_coding	Mus musculus D-tyrosyl-tRNA deacylase 2 (Dtd2), transcript variant 1, mRNA. [Source:RefSeq mRNA;Acc:NM_001347404]
ENSMUSG00000021281	Tnfaip2	8	18.4	0.69	0.0669026	0.782865	8	18.4	0.64	0.113656	0.92421	12	111442469	111455018	4984	55.5	1	protein_coding	tumor necrosis factor, alpha-induced protein 2 [Source:MGI Symbol;Acc:MGI:104960]
ENSMUSG00000022827	Rabl3	62.8	110.8	0.69	0.0117087	0.298426	62.8	110.8	0.69	0.0215164	0.415305	16	37539885	37572385	6369	40.91	1	protein_coding	Rab-like protein 3 [Source:UniProtKB/Swiss-Prot;Acc:Q9D4V7]
ENSMUSG00000023805	Synj2	54.3	94.9	0.69	0.00779234	0.242508	54.3	94.9	0.66	0.0213825	0.422647	17	5941280	6044290	8342	48.04	1	protein_coding	Synaptojanin-2 [Source:UniProtKB/Swiss-Prot;Acc:Q9D2G5]
ENSMUSG00000024014	Pim1	25.6	48.3	0.69	0.0371578	0.643324	25.6	48.3	0.64	0.0722507	0.681409	17	29490812	29496111	2638	52.74	1	protein_coding	Pim-1 proto-oncogene, serine/threonine kinase [Source:HGNC Symbol;Acc:HGNC:8986]
ENSMUSG00000024403	Atp6v1g2	11.9	28.7	0.69	0.068073	0.689344	11.9	28.7	0.75	0.0605792	0.653342	17	35233660	35238767	2510	52.31	1	protein_coding	ATPase, H+ transporting, lysosomal V1 subunit G2 [Source:MGI Symbol;Acc:MGI:1913487]
ENSMUSG00000024680	Ms4a2	1	19.4	0.69	#N/A	#N/A	1	19.4	1.06	0.00570563	0.362291	19	11615523	11623719	2813	37.65	-1	protein_coding	membrane-spanning 4-domains, subfamily A, member 2 [Source:MGI Symbol;Acc:MGI:95495]
ENSMUSG00000026692	Fmo4	30.7	61.1	0.69	0.049139	0.574273	30.7	61.1	0.95	0.00552329	0.205518	1	162793188	162813972	3707	40.73	-1	protein_coding	Dimethylaniline monooxygenase [N-oxide-forming] 4 [Source:UniProtKB/Swiss-Prot;Acc:Q8VHG0]
ENSMUSG00000027684	Mecom	254.9	440.1	0.69	0.00786151	0.242632	254.9	440.1	0.62	0.0163878	0.362291	3	29951296	30548008	12427	41.5	-1	protein_coding	MDS1 and EVI1 complex locus [Source:MGI Symbol;Acc:MGI:95457]
ENSMUSG00000029249	Rest	131.4	227.3	0.69	0.00635546	0.220257	131.4	227.3	0.7	0.00983879	0.275246	5	77265491	77286432	7222	47.28	1	protein_coding	RE1-silencing transcription factor [Source:UniProtKB/Swiss-Prot;Acc:Q8VIG1]
ENSMUSG00000030752	Kdm8	8.8	20.7	0.69	0.0635741	0.745488	8.8	20.7	0.69	0.0858969	0.734614	7	125444676	125462269	2389	49.85	1	protein_coding	JmjC domain-containing protein 5 [Source:UniProtKB/Swiss-Prot;Acc:Q9CXT6]
ENSMUSG00000032965	Ift57	15.8	42.7	0.69	0.0697403	0.765092	15.8	42.7	0.7	0.0864049	0.700606	16	49699233	49765126	2862	39.29	1	protein_coding	Intraflagellar transport [Source:UniProtKB/Swiss-Prot;Acc:Q8BXG3]
ENSMUSG00000032977	Fam207a	10.4	33.4	0.69	0.0668472	0.73733	10.4	33.4	0.94	0.0219983	0.418332	10	77486661	77515785	2679	50.89	-1	protein_coding	Protein FAM207A [Source:UniProtKB/Swiss-Prot;Acc:P58468]
ENSMUSG00000035200	Chrnb4	21.4	41.8	0.69	0.0440755	0.65586	21.4	41.8	0.68	0.0654428	0.673788	9	55028154	55048779	3723	48.88	-1	protein_coding	cholinergic receptor, nicotinic, beta polypeptide 4 [Source:MGI Symbol;Acc:MGI:87892]
ENSMUSG00000044393	Dsg2	792	1324.6	0.69	0.000380421	0.0370992	792	1324.6	0.59	0.00110984	0.0800714	18	20558074	20604521	8268	42.44	1	protein_coding	Desmoglein-2 [Source:UniProtKB/Swiss-Prot;Acc:O55111]
ENSMUSG00000051212	Gpr183	17.2	36.7	0.69	0.0578585	0.707399	17.2	36.7	0.82	0.0286323	0.498731	14	121952551	121965195	2887	43.96	-1	protein_coding	G protein-coupled receptor 183 [Source:MGI Symbol;Acc:MGI:2442034]
ENSMUSG00000069272	Hist1h2ae	43.1	78.7	0.69	0.0234541	0.412335	43.1	78.7	0.64	0.0534167	0.611901	13	23570517	23571220	704	54.12	-1	protein_coding	Histone H2A type 1-B [Source:UniProtKB/Swiss-Prot;Acc:C0HKE1]
ENSMUSG00000084353	Gm15452	18.7	34.2	0.69	0.0249746	0.544996	18.7	34.2	0.61	0.0701838	0.661884	1	8791923	8792162	240	44.58	-1	processed_pseudogene	predicted gene 15452 [Source:MGI Symbol;Acc:MGI:3768636]
ENSMUSG00000087175	Gm15133	0	12.8	0.69	0.0225163	0.633296	0	12.8	0.83	0.0156936	0.539009	7	104315019	104324838	844	40.01	1	antisense	predicted gene 15133 [Source:MGI Symbol;Acc:MGI:3705170]
ENSMUSG00000097781	9330136K24Rik	0.8	6.9	0.69	0.040253	1	0.8	6.9	0.71	0.0532368	1	17	21528194	21535878	2478	44.28	-1	lincRNA	RIKEN cDNA 9330136K24 gene [Source:MGI Symbol;Acc:MGI:2442883]
ENSMUSG00000104324	Gm37320	7.6	18.5	0.69	0.0686859	0.745488	7.6	18.5	0.7	0.08725	0.881956	15	68321381	68326333	4953	38.34	-1	TEC	predicted gene, 37320 [Source:MGI Symbol;Acc:MGI:5610548]
ENSMUSG00000104469	Gm37663	8.6	19.9	0.69	0.0671605	0.745488	8.6	19.9	0.53	0.183671	0.985989	9	71988973	71991271	2299	36.06	-1	TEC	predicted gene, 37663 [Source:MGI Symbol;Acc:MGI:5610891]
ENSMUSG00000112922	Gm47572	1.2	5.9	0.69	0.0544584	1	1.2	5.9	0.65	0.0909719	1	10	82157101	82160461	3361	42.73	1	TEC	predicted gene, 47572 [Source:MGI Symbol;Acc:MGI:6096602]
ENSMUSG00000001435	Col18a1	8.9	20.7	0.68	0.0709119	0.7548	8.9	20.7	0.67	0.0972089	0.729433	10	77052178	77166548	7021	50.81	-1	protein_coding	Collagen alpha-1(XVIII) chain Endostatin Non-collagenous domain 1 [Source:UniProtKB/Swiss-Prot;Acc:P39061]
ENSMUSG00000002996	Hbp1	107.4	186.6	0.68	0.00946345	0.26929	107.4	186.6	0.74	0.00678804	0.226198	12	31926254	31950535	6167	40.21	-1	protein_coding	HMG-box transcription factor 1 [Source:HGNC Symbol;Acc:HGNC:23200]
ENSMUSG00000019986	Ahi1	34.3	68.2	0.68	0.050002	0.577081	34.3	68.2	0.76	0.034576	0.491834	10	20952547	21080429	7040	40.85	1	protein_coding	Abelson helper integration site 1 [Source:HGNC Symbol;Acc:HGNC:21575]
ENSMUSG00000020429	Igfbp1	0.7	52.2	0.68	0.0244032	0.418328	0.7	52.2	0.7	0.0344177	0.502989	11	7197782	7202546	1525	48.86	1	protein_coding	Insulin-like growth factor-binding protein 1 [Source:UniProtKB/Swiss-Prot;Acc:P47876]
ENSMUSG00000020812	1810032O08Rik	10.9	24.6	0.68	0.0690017	0.690647	10.9	24.6	0.68	0.0937167	0.721388	11	116671660	116675799	2776	49.01	1	protein_coding	RIKEN cDNA 1810032O08 gene [Source:MGI Symbol;Acc:MGI:1913543]
ENSMUSG00000020899	Pfas	46.5	87.1	0.68	0.0333152	0.483191	46.5	87.1	0.74	0.0279072	0.461322	11	68985697	69008460	7933	48.13	-1	protein_coding	Phosphoribosylformylglycinamidine synthase [Source:UniProtKB/Swiss-Prot;Acc:Q5SUR0]
ENSMUSG00000021340	Gpld1	21.1	42.6	0.68	0.0545394	0.716784	21.1	42.6	0.7	0.0667597	0.694863	13	24943152	24992501	5415	45.36	1	protein_coding	glycosylphosphatidylinositol specific phospholipase D1 [Source:HGNC Symbol;Acc:HGNC:4459]
ENSMUSG00000023947	Nfkbie	5.3	15.3	0.68	0.0720094	0.989166	5.3	15.3	0.63	0.121295	0.945141	17	45555716	45563169	2422	53.46	1	protein_coding	NF-kappa-B inhibitor epsilon [Source:UniProtKB/Swiss-Prot;Acc:O54910]
ENSMUSG00000024039	Cbs	31.3	61.6	0.68	0.0456889	0.632442	31.3	61.6	0.85	0.0113062	0.314677	17	31612623	31637199	3343	51.33	-1	protein_coding	Cystathionine beta-synthase [Source:UniProtKB/Swiss-Prot;Acc:Q91WT9]
ENSMUSG00000025450	Gm9752	1.1	6.4	0.68	0.0523936	1	1.1	6.4	0.68	0.0701542	1	13	119473804	119476761	2659	43.64	-1	processed_transcript
ENSMUSG00000027276	Jag1	22.5	43.8	0.68	0.0421033	0.537588	22.5	43.8	0.7	0.0559019	0.661884	2	137081456	137116644	5827	47.37	-1	protein_coding	Protein jagged-1 [Source:UniProtKB/Swiss-Prot;Acc:Q9QXX0]
ENSMUSG00000028678	Kif2c	17.8	37.5	0.68	0.0618349	0.632394	17.8	37.5	0.63	0.105572	0.788054	4	117159639	117182639	4363	47.46	-1	protein_coding	Kinesin-like protein KIF2C [Source:UniProtKB/Swiss-Prot;Acc:Q922S8]
ENSMUSG00000031633	Slc25a4	166.2	283.7	0.68	0.00739473	0.236468	166.2	283.7	0.65	0.0151238	0.342423	8	46206797	46211284	2353	49.84	-1	protein_coding	solute carrier family 25 (mitochondrial carrier, adenine nucleotide translocator), member 4 [Source:MGI Symbol;Acc:MGI:1353495]
ENSMUSG00000032320	Rcn2	130.5	225.4	0.68	0.0084628	0.253181	130.5	225.4	0.66	0.0182105	0.382367	9	56041845	56061882	4745	39.63	1	protein_coding	Reticulocalbin-2 [Source:UniProtKB/Swiss-Prot;Acc:Q8BP92]
ENSMUSG00000037149	Ddx1	217.4	367.7	0.68	0.00347061	0.154987	217.4	367.7	0.68	0.0067171	0.232479	12	13216973	13249213	5080	40.26	-1	protein_coding	ATP-dependent RNA helicase DDX1 [Source:UniProtKB/Swiss-Prot;Acc:Q91VR5]
ENSMUSG00000040591	1110051M20Rik	23.6	48.1	0.68	0.0582014	0.619019	23.6	48.1	0.72	0.0590675	0.64724	2	91275068	91444704	5202	43.4	-1	protein_coding	RIKEN cDNA 1110051M20 gene [Source:MGI Symbol;Acc:MGI:1915079]
ENSMUSG00000050410	Tcf19	16.5	37.6	0.68	0.0680117	0.740392	16.5	37.6	0.91	0.0174445	0.428653	17	35512734	35516824	1782	51.36	-1	protein_coding	transcription factor 19 [Source:MGI Symbol;Acc:MGI:103180]
ENSMUSG00000062846	Gm14176	13.6	26.1	0.68	0.0439907	0.679956	13.6	26.1	0.73	0.0426608	0.613711	2	157901536	157902012	477	49.06	1	processed_pseudogene	predicted gene 14176 [Source:MGI Symbol;Acc:MGI:3650021]
ENSMUSG00000078546	Zfp995	31.3	55.9	0.68	0.0197693	0.389965	31.3	55.9	0.71	0.0261131	0.450766	17	21879570	21909926	3167	38.77	-1	protein_coding	zinc finger protein 995 [Source:MGI Symbol;Acc:MGI:1917331]
ENSMUSG00000082070	Gm1866	12.8	25	0.68	0.0484725	0.694888	12.8	25	0.69	0.067834	0.649706	X	114592048	114592524	477	44.03	-1	processed_pseudogene	predicted gene 1866 [Source:MGI Symbol;Acc:MGI:3037724]
ENSMUSG00000091952	Gm17709	1.8	6.9	0.68	0.065371	1	1.8	6.9	0.66	0.0929215	1	8	121972727	121973822	1096	48.36	-1	processed_pseudogene	predicted gene, 17709 [Source:MGI Symbol;Acc:MGI:4937343]
ENSMUSG00000092203	1110038B12Rik	178.1	299.8	0.68	0.00376356	0.162151	178.1	299.8	0.64	0.0109454	0.299587	17	34950238	34952471	1811	49.15	-1	processed_transcript	RIKEN cDNA 1110038B12 gene [Source:MGI Symbol;Acc:MGI:1916013]
ENSMUSG00000096676	Gm24517	2.8	9.3	0.68	0.0700975	0.859453	2.8	9.3	0.68	0.0926267	0.893233	1	134280885	134280991	107	41.12	-1	snRNA	predicted gene, 24517 [Source:MGI Symbol;Acc:MGI:5454294]
ENSMUSG00000101431	Gm7901	3.8	12	0.68	0.0723564	0.862531	3.8	12	0.8	0.0486972	0.763359	8	75711600	75713196	1597	57.86	-1	processed_pseudogene	predicted gene 7901 [Source:MGI Symbol;Acc:MGI:3645047]
ENSMUSG00000108435	Gm45051	3.2	12.2	0.68	0.0636827	0.843544	3.2	12.2	0.73	0.0704212	1	6	72347029	72348458	963	53.29	-1	antisense	predicted gene 45051 [Source:MGI Symbol;Acc:MGI:5753627]
ENSMUSG00000005883	Spo11	0.5	5.1	0.67	0.0405416	1	0.5	5.1	0.63	0.0697916	1	2	172977700	172993576	3921	46.43	1	protein_coding	Meiotic recombination protein SPO11 [Source:UniProtKB/Swiss-Prot;Acc:Q9WTK8]
ENSMUSG00000007872	Id3	246.1	445.5	0.67	0.0301404	0.459848	246.1	445.5	0.52	0.0949981	0.694863	4	136143497	136145755	1791	55.51	1	protein_coding	DNA-binding protein inhibitor ID-3 [Source:UniProtKB/Swiss-Prot;Acc:P41133]
ENSMUSG00000024810	Il33	8.6	30.7	0.67	0.0684347	0.751281	8.6	30.7	0.72	0.0748118	0.723427	19	29925114	29960718	2886	42.14	1	protein_coding	Interleukin-33 Interleukin-33(102-266) Interleukin-33(109-266) [Source:UniProtKB/Swiss-Prot;Acc:Q8BVZ5]
ENSMUSG00000027379	Bub1	37.2	88.7	0.67	0.0785707	0.677991	37.2	88.7	0.65	0.110073	0.751844	2	127801122	127831865	4354	36.24	-1	protein_coding	mitotic checkpoint serine/threonine-protein kinase BUB1 isoform 2 [Source:RefSeq peptide;Acc:NP_033902]
ENSMUSG00000027660	Skil	122.1	200.9	0.67	0.000744623	0.0602694	122.1	200.9	0.65	0.00393194	0.170339	3	31095058	31122577	9694	41.33	1	protein_coding	SKI-like [Source:MGI Symbol;Acc:MGI:106203]
ENSMUSG00000029283	Cdc7	12.1	30.5	0.67	0.0765917	0.707399	12.1	30.5	0.65	0.111	0.74553	5	106964322	106984432	4183	42.29	1	protein_coding	Cell division cycle 7-related protein kinase [Source:UniProtKB/Swiss-Prot;Acc:Q9Z0H0]
ENSMUSG00000029363	Rfc5	55.6	103.8	0.67	0.0359361	0.494617	55.6	103.8	0.84	0.0101623	0.282046	5	117378103	117389047	4669	50.66	-1	protein_coding	replication factor C (activator 1) 5 [Source:MGI Symbol;Acc:MGI:1919401]
ENSMUSG00000029999	Tgfa	54.2	97.1	0.67	0.0290176	0.450012	54.2	97.1	0.57	0.0758083	0.689905	6	86195223	86275719	6490	47.89	1	protein_coding	transforming growth factor alpha [Source:MGI Symbol;Acc:MGI:98724]
ENSMUSG00000032254	Kif23	90.3	154	0.67	0.00964431	0.271282	90.3	154	0.63	0.0236761	0.425023	9	61915905	61946774	7901	43.05	-1	protein_coding	Kinesin-like protein KIF23 [Source:UniProtKB/Swiss-Prot;Acc:E9Q5G3]
ENSMUSG00000033952	Aspm	47.6	95.5	0.67	0.0578341	0.617484	47.6	95.5	0.7	0.0657279	0.662098	1	139454772	139494091	11590	40.38	1	protein_coding	Abnormal spindle-like microcephaly-associated protein homolog [Source:UniProtKB/Swiss-Prot;Acc:Q8CJ27]
ENSMUSG00000034462	Pkd2	48.7	99.3	0.67	0.0591628	0.617484	48.7	99.3	0.82	0.0240271	0.426057	5	104459450	104505819	10169	43.41	1	protein_coding	Polycystin-2 [Source:UniProtKB/Swiss-Prot;Acc:O35245]
ENSMUSG00000034910	Pygo1	0.7	6.9	0.67	0.0408727	1	0.7	6.9	0.65	0.0689136	1	9	72925645	72952181	7916	43.68	1	protein_coding	pygopus 1 [Source:MGI Symbol;Acc:MGI:1919385]
ENSMUSG00000036992	Nxt1	57.1	100	0.67	0.0243034	0.418328	57.1	100	0.59	0.054023	0.601081	2	148672601	148676027	1116	47.04	1	protein_coding	NTF2-related export protein 1 [Source:UniProtKB/Swiss-Prot;Acc:Q9QZV9]
ENSMUSG00000040669	Phc1	46.8	81.8	0.67	0.0134813	0.323446	46.8	81.8	0.72	0.0156897	0.378881	6	122317731	122340561	5297	45.05	-1	protein_coding	Mus musculus polyhomeotic 1 (Phc1), transcript variant 5, mRNA. [Source:RefSeq mRNA;Acc:NM_001355215]
ENSMUSG00000049866	Arl4c	22.6	49.2	0.67	0.0712173	0.748304	22.6	49.2	0.59	0.134179	0.775786	1	88673125	88702221	5492	47.5	-1	protein_coding	ADP-ribosylation factor-like protein 4C [Source:UniProtKB/Swiss-Prot;Acc:P61208]
ENSMUSG00000052139	Babam2	132.9	233.4	0.67	0.0195657	0.382168	132.9	233.4	0.72	0.0156436	0.355618	5	31697684	32084962	4781	41.56	1	protein_coding	BRISC and BRCA1-A complex member 2 [Source:UniProtKB/Swiss-Prot;Acc:Q8K3W0]
ENSMUSG00000056061	Gata5os	1.9	6.8	0.67	0.0685033	1	1.9	6.8	0.71	0.0760224	1	2	180332857	180340732	1678	53.2	1	antisense
ENSMUSG00000057130	Txnl4a	121.6	205.9	0.67	0.00516082	0.192767	121.6	205.9	0.7	0.00635393	0.218392	18	80206795	80223533	2185	47.73	1	protein_coding	thioredoxin-like 4A [Source:MGI Symbol;Acc:MGI:1351613]
ENSMUSG00000058070	Eml1	14.7	35.2	0.67	0.076919	0.679076	14.7	35.2	0.7	0.0822402	0.724301	12	108370957	108539617	7436	47.74	1	protein_coding	Echinoderm microtubule-associated protein-like 1 [Source:UniProtKB/Swiss-Prot;Acc:Q05BC3]
ENSMUSG00000059336	Slc14a1	36.9	75.4	0.67	0.0641834	0.637546	36.9	75.4	0.61	0.113122	0.747105	18	78100091	78142119	3995	46.75	-1	protein_coding	Urea transporter 1 [Source:UniProtKB/Swiss-Prot;Acc:Q8VHL0]
ENSMUSG00000061731	Ext1	70.9	122.3	0.67	0.0143032	0.334759	70.9	122.3	0.62	0.0371715	0.498731	15	53064038	53346159	8077	42.65	-1	protein_coding	Exostosin-1 [Source:UniProtKB/Swiss-Prot;Acc:P97464]
ENSMUSG00000063889	Crem	53.7	102.6	0.67	0.0530701	0.594993	53.7	102.6	0.65	0.0748655	0.67237	18	3266048	3337748	5895	38.63	-1	protein_coding	cAMP-responsive element modulator [Source:UniProtKB/Swiss-Prot;Acc:P27699]
ENSMUSG00000064061	Dzip3	36.3	62.8	0.67	0.0174462	0.418328	36.3	62.8	0.58	0.0509036	0.620363	16	48924232	48994165	9081	35.33	-1	protein_coding	E3 ubiquitin-protein ligase DZIP3 [Source:UniProtKB/Swiss-Prot;Acc:Q7TPV2]
ENSMUSG00000067235	H2-Q10	8.3	20	0.67	0.0748408	0.990501	8.3	20	0.81	0.042294	0.754648	17	35470089	35474563	4348	53.36	1	protein_coding	H-2 class I histocompatibility antigen, Q10 alpha chain [Source:UniProtKB/Swiss-Prot;Acc:P01898]
ENSMUSG00000068246	Apol9b	8.3	16.9	0.67	0.0634464	0.767943	8.3	16.9	0.62	0.113547	0.936561	15	77729039	77736382	1821	50.94	1	protein_coding	apolipoprotein L 9b [Source:MGI Symbol;Acc:MGI:1919148]
ENSMUSG00000079038	D130040H23Rik	54.9	111.6	0.67	0.0656812	0.644044	54.9	111.6	0.68	0.0739341	0.669571	8	69271080	69314207	4494	39.85	1	protein_coding	RIKEN cDNA D130040H23 gene [Source:MGI Symbol;Acc:MGI:2444324]
ENSMUSG00000083367	Gm8806	14.5	30.6	0.67	0.0655627	0.68156	14.5	30.6	0.75	0.049878	0.613711	X	80533745	80535151	1407	50.82	-1	processed_pseudogene	predicted gene 8806 [Source:MGI Symbol;Acc:MGI:3643511]
ENSMUSG00000084846	A730011C13Rik	16.8	44.2	0.67	0.0757214	0.786594	16.8	44.2	0.7	0.087197	0.751645	3	94994410	94997350	2234	45.73	-1	antisense	RIKEN cDNA A730011C13 gene [Source:MGI Symbol;Acc:MGI:2442973]
ENSMUSG00000084866	A930006K02Rik	2.9	8.5	0.67	0.0764295	0.99657	2.9	8.5	0.66	0.104932	0.92421	16	91465104	91470121	776	44.44	1	processed_transcript	RIKEN cDNA A930006K02 gene [Source:MGI Symbol;Acc:MGI:1925683]
ENSMUSG00000089999	Gm6485	97.1	168.2	0.67	0.0169811	0.362619	97.1	168.2	0.68	0.0232746	0.428653	3	104752727	104753165	439	59	-1	transcribed_processed_pseudogene	predicted gene 6485 [Source:MGI Symbol;Acc:MGI:3644007]
ENSMUSG00000104043	Gm6525	13.1	28	0.67	0.0666996	0.745488	13.1	28	0.72	0.0642285	0.640982	3	84174104	84175132	1029	42.18	1	protein_coding
ENSMUSG00000104295	Gm6197	0.6	3.9	0.67	0.0486725	1	0.6	3.9	0.63	0.0793005	1	3	25731243	25731696	454	45.37	1	processed_pseudogene	predicted gene 6197 [Source:MGI Symbol;Acc:MGI:3647151]
ENSMUSG00000020420	Zfp607a	13	36.9	0.66	0.0813754	0.682929	13	36.9	0.74	0.0719483	0.658279	7	27857527	27880825	4546	42.77	1	protein_coding	zinc finger protein 607A [Source:MGI Symbol;Acc:MGI:3584526]
ENSMUSG00000021176	Efcab11	2.1	10.2	0.66	0.0622658	0.993235	2.1	10.2	0.64	0.0933861	0.879133	12	99693045	99884439	5309	43.39	-1	protein_coding	EF-hand calcium-binding domain-containing protein 11 [Source:UniProtKB/Swiss-Prot;Acc:Q9D0E5]
ENSMUSG00000025938	Slco5a1	8.1	20.7	0.66	0.0798384	0.803306	8.1	20.7	0.61	0.126237	0.945141	1	12866549	12992650	13137	42	-1	protein_coding	solute carrier organic anion transporter family, member 5A1 [Source:MGI Symbol;Acc:MGI:2443431]
ENSMUSG00000027018	Hat1	139.7	229.5	0.66	0.0028752	0.141859	139.7	229.5	0.58	0.00367895	0.165196	2	71388958	71441622	2886	39.63	1	protein_coding	Histone acetyltransferase type B catalytic subunit [Source:UniProtKB/Swiss-Prot;Acc:Q8BY71]
ENSMUSG00000029769	Ccdc136	5.2	13.6	0.66	0.0820462	0.787517	5.2	13.6	0.65	0.111692	0.932079	6	29396309	29426994	4334	47.75	1	protein_coding	Mus musculus coiled-coil domain containing 136 (Ccdc136), transcript variant 4, mRNA. [Source:RefSeq mRNA;Acc:NM_001347072]
ENSMUSG00000033809	Alg3	72	128.3	0.66	0.0286704	0.447752	72	128.3	0.7	0.0273453	0.46029	16	20605451	20610768	1451	49.94	-1	protein_coding	Mus musculus asparagine-linked glycosylation 3 (alpha-1,3-mannosyltransferase) (Alg3), transcript variant 3, mRNA. [Source:RefSeq mRNA;Acc:NM_001357404]
ENSMUSG00000034235	Usp54	23.4	45.3	0.66	0.0568073	0.704276	23.4	45.3	0.68	0.0686295	0.658429	14	20548912	20641063	9068	40.9	-1	protein_coding	ubiquitin specific peptidase 54 [Source:MGI Symbol;Acc:MGI:1926037]
ENSMUSG00000037738	Nek5	15.3	30.1	0.66	0.0610244	0.727442	15.3	30.1	0.79	0.0311789	0.477106	8	22073616	22125053	2897	42.6	-1	protein_coding	Mus musculus NIMA (never in mitosis a)-related expressed kinase 5 (Nek5), transcript variant 2, mRNA. [Source:RefSeq mRNA;Acc:NM_001347318]
ENSMUSG00000042250	Pglyrp4	0.9	7.8	0.66	0.0464329	1	0.9	7.8	0.68	0.0590789	1	3	90726906	90741517	2368	44.45	1	protein_coding	peptidoglycan recognition protein 4 [Source:MGI Symbol;Acc:MGI:2686324]
ENSMUSG00000046295	Ankle1	9.2	22	0.66	0.0790156	0.713548	9.2	22	0.69	0.0920782	0.760697	8	71406010	71409904	2558	55.87	1	protein_coding	Ankyrin repeat and LEM domain-containing protein 1 [Source:UniProtKB/Swiss-Prot;Acc:A8VU90]
ENSMUSG00000051934	Spats2	41.7	78.1	0.66	0.050146	0.582512	41.7	78.1	0.58	0.107615	0.747199	15	99125916	99213215	4120	45.08	1	protein_coding	Spermatosis-associated serine-rich protein 2 [Source:UniProtKB/Swiss-Prot;Acc:Q8K1N4]
ENSMUSG00000052584	Serp2	1	5.9	0.66	0.0533605	1	1	5.9	0.64	0.0829171	1	14	76532814	76556889	1388	45.64	-1	protein_coding	Stress-associated endoplasmic reticulum protein 2 [Source:UniProtKB/Swiss-Prot;Acc:Q6TAW2]
ENSMUSG00000058748	Zfp958	33.1	59.4	0.66	0.0402786	0.598895	33.1	59.4	0.62	0.0727483	0.681409	8	4613167	4630231	2364	40.08	1	protein_coding	zinc finger protein 958 [Source:MGI Symbol;Acc:MGI:2385298]
ENSMUSG00000063019	Manbal	22.9	45.5	0.66	0.0623002	0.743379	22.9	45.5	0.77	0.0332692	0.499288	2	157367594	157396763	1107	48.52	1	protein_coding	mannosidase beta like [Source:HGNC Symbol;Acc:HGNC:15799]
ENSMUSG00000064755	Gm26328	15.4	30.9	0.66	0.0618531	0.733564	15.4	30.9	0.69	0.0690063	0.687452	14	52342777	52342883	107	43.93	1	snRNA	predicted gene, 26328 [Source:MGI Symbol;Acc:MGI:5456105]
ENSMUSG00000070372	Capza1	54.5	92	0.66	0.00507382	0.191025	54.5	92	0.7	0.00699181	0.237477	3	104822779	104864505	3781	40.78	-1	protein_coding
ENSMUSG00000083804	Gm13676	3.8	12.4	0.66	0.0764219	0.86809	3.8	12.4	0.67	0.0949251	0.904874	2	82543932	82544522	591	40.61	-1	processed_pseudogene	predicted gene 13676 [Source:MGI Symbol;Acc:MGI:3649533]
ENSMUSG00000111271	Gm48127	2.2	8.3	0.66	0.0683804	1	2.2	8.3	0.7	0.0772943	1	9	40342308	40342938	573	47.86	-1	sense_intronic	predicted gene, 48127 [Source:MGI Symbol;Acc:MGI:6097485]
ENSMUSG00000113335	Gm48296	1.7	8.3	0.66	0.0616094	1	1.7	8.3	0.8	0.0437521	1	12	100187011	100187705	695	57.55	1	TEC	predicted gene, 48296 [Source:MGI Symbol;Acc:MGI:6097737]
ENSMUSG00000003418	St8sia6	2.9	11.8	0.65	0.0705249	0.993235	2.9	11.8	0.69	0.0778235	0.8656	2	13651021	13794064	7664	40.77	-1	protein_coding	ST8 alpha-N-acetyl-neuraminide alpha-2,8-sialyltransferase 6 [Source:MGI Symbol;Acc:MGI:2386797]
ENSMUSG00000021608	Lpcat1	15.9	28.2	0.65	0.0367022	0.544996	15.9	28.2	0.62	0.0750188	0.702152	13	73467197	73516422	4632	48.35	1	protein_coding	Lysophosphatidylcholine acyltransferase 1 [Source:UniProtKB/Swiss-Prot;Acc:Q3TFD2]
ENSMUSG00000022176	Rem2	8.9	19.2	0.65	0.0785078	0.774801	8.9	19.2	0.78	0.0492729	0.771865	14	54476100	54480431	2251	53.07	1	protein_coding	RRAD and GEM like GTPase 2 [Source:HGNC Symbol;Acc:HGNC:20248]
ENSMUSG00000022178	Ajuba	7.4	20.3	0.65	0.0854927	0.83043	7.4	20.3	0.68	0.0973541	0.895135	14	54567472	54577558	3646	55.37	-1	protein_coding	LIM domain-containing protein ajuba [Source:UniProtKB/Swiss-Prot;Acc:Q91XC0]
ENSMUSG00000025353	Ormdl2	46	84.3	0.65	0.0505219	0.578284	46	84.3	0.69	0.0486839	0.571256	10	128817902	128821645	1670	43.19	-1	protein_coding	Mus musculus ORM1-like 2 (S. cerevisiae) (Ormdl2), transcript variant 4, mRNA. [Source:RefSeq mRNA;Acc:NM_001359171]
ENSMUSG00000026096	Osgepl1	33.8	59.9	0.65	0.0399891	0.517238	33.8	59.9	0.64	0.0633404	0.646047	1	53313624	53326343	6147	37.62	1	protein_coding	Probable tRNA N6-adenosine threonylcarbamoyltransferase, mitochondrial [Source:UniProtKB/Swiss-Prot;Acc:Q6PEB4]
ENSMUSG00000027555	Car13	16.8	36.5	0.65	0.080795	0.681681	16.8	36.5	0.77	0.0434617	0.54362	3	14641727	14663002	2299	40.6	1	protein_coding	Carbonic anhydrase 13 [Source:UniProtKB/Swiss-Prot;Acc:Q9D6N1]
ENSMUSG00000027751	Supt20	113.2	193	0.65	0.0138047	0.32672	113.2	193	0.71	0.00892286	0.251781	3	54692807	54728766	6266	40.19	1	protein_coding	Transcription factor SPT20 homolog [Source:UniProtKB/Swiss-Prot;Acc:Q7TT00]
ENSMUSG00000031286	Glt28d2	7.5	19.9	0.65	0.0848469	0.990501	7.5	19.9	0.71	0.081804	0.868255	3	85869849	85887516	2732	42.55	-1	protein_coding
ENSMUSG00000037921	Ddx60	35.7	67.4	0.65	0.0596045	0.624103	35.7	67.4	0.52	0.142316	0.777577	8	61928087	62038244	8684	38.57	1	protein_coding	DExD/H-box helicase 60 [Source:HGNC Symbol;Acc:HGNC:25942]
ENSMUSG00000044702	Palb2	17.7	32.6	0.65	0.0514535	0.690647	17.7	32.6	0.64	0.0823974	0.704639	7	122107262	122132985	7342	44	-1	protein_coding	Partner and localizer of BRCA2 [Source:UniProtKB/Swiss-Prot;Acc:Q3U0P1]
ENSMUSG00000046546	Fam43a	15.7	27.7	0.65	0.037175	0.54895	15.7	27.7	0.61	0.079994	0.738697	16	30599723	30602797	3075	57.72	1	protein_coding	Protein FAM43A [Source:UniProtKB/Swiss-Prot;Acc:Q8BUP8]
ENSMUSG00000048490	Nrip1	240.3	423.1	0.65	0.0366295	0.49825	240.3	423.1	0.56	0.0742162	0.664263	16	76287400	76373827	11457	42.99	-1	protein_coding	Mus musculus nuclear receptor interacting protein 1 (Nrip1), transcript variant 2, mRNA. [Source:RefSeq mRNA;Acc:NM_001358238]
ENSMUSG00000052031	Tagap1	48.7	85.4	0.65	0.0281539	0.446232	48.7	85.4	0.71	0.0195689	0.420583	17	6954965	6961156	2358	45.8	-1	protein_coding	T-cell activation GTPase-activating protein 1 [Source:UniProtKB/Swiss-Prot;Acc:P0CAX8]
ENSMUSG00000060261	Gtf2i	275.1	446.2	0.65	0.00140024	0.0884804	275.1	446.2	0.62	0.00537696	0.201764	5	134237834	134314760	10199	48.54	-1	protein_coding	Mus musculusral transcription factor II I (Gtf2i), transcript variant 7, mRNA. [Source:RefSeq mRNA;Acc:NM_001359063]
ENSMUSG00000061048	Cdh3	0.3	5.7	0.65	0.0355372	1	0.3	5.7	0.65	0.0546258	1	8	106510891	106557297	4384	47.57	1	protein_coding	Cadherin-3 [Source:UniProtKB/Swiss-Prot;Acc:P10287]
ENSMUSG00000076437	Selenoh	131.3	221.7	0.65	0.0138655	0.326894	131.3	221.7	0.58	0.0329686	0.477416	2	84669215	84670770	1131	50.51	-1	protein_coding	Selenoprotein H [Source:UniProtKB/Swiss-Prot;Acc:Q3UQA7]
ENSMUSG00000080832	M6pr-ps	5	15	0.65	0.0842742	0.990501	5	15	0.67	0.1012	0.919228	3	99500550	99501379	830	49.88	1	processed_pseudogene	mannose-6-phosphate receptor, pseudogene [Source:MGI Symbol;Acc:MGI:96905]
ENSMUSG00000084145	Gm12263	3	8.7	0.65	0.0836737	1	3	8.7	0.73	0.0741232	0.850498	11	59474284	59475765	1482	48.58	-1	processed_pseudogene	predicted gene 12263 [Source:MGI Symbol;Acc:MGI:3650086]
ENSMUSG00000090138	Gm3687	1.2	6.1	0.65	0.0680066	1	1.2	6.1	0.69	0.0733809	1	5	63694054	63694513	460	52.39	1	processed_pseudogene	predicted gene 3687 [Source:MGI Symbol;Acc:MGI:3781863]
ENSMUSG00000092193	Cd9-ps	17.3	35.1	0.65	0.075606	0.729154	17.3	35.1	0.66	0.095875	0.724395	7	41682658	41683307	650	49.38	-1	processed_pseudogene	Cd9 antigen, pseudogene [Source:MGI Symbol;Acc:MGI:3645134]
ENSMUSG00000094777	Hist1h2ap	13.1	24.6	0.65	0.0532091	0.700862	13.1	24.6	0.6	0.107434	0.747105	13	21833026	21833507	482	64.52	-1	protein_coding	Histone H2A type 1-B [Source:UniProtKB/Swiss-Prot;Acc:C0HKE1]
ENSMUSG00000105081	Gm43110	7.8	19.4	0.65	0.087911	0.800274	7.8	19.4	0.72	0.0777856	0.871624	5	22472767	22472992	226	60.18	-1	processed_pseudogene	predicted gene 43110 [Source:MGI Symbol;Acc:MGI:5663247]
ENSMUSG00000113776	Gm19327	7.7	17.1	0.65	0.0800328	0.787118	7.7	17.1	0.67	0.0942225	0.890853	12	84184536	84187806	3271	50.84	-1	TEC
ENSMUSG00000113917	Gm48382	3.8	20.6	0.65	#N/A	#N/A	3.8	20.6	0.92	0.0218424	0.620363	12	100366078	100369752	3675	42.78	-1	TEC	predicted gene, 48382 [Source:MGI Symbol;Acc:MGI:6097861]
ENSMUSG00000003585	Sec14l2	18.2	35.4	0.64	0.07531	0.759299	18.2	35.4	0.65	0.0882639	0.75634	11	4097039	4123415	3505	50.96	-1	protein_coding	SEC14-like protein 2 [Source:UniProtKB/Swiss-Prot;Acc:Q99J08]
ENSMUSG00000007867	Ift43	55.8	94.3	0.64	0.023676	0.412928	55.8	94.3	0.63	0.0404684	0.522315	12	86082541	86162459	1651	48.56	1	protein_coding	Intraflagellar transport [Source:UniProtKB/Swiss-Prot;Acc:Q9DA69]
ENSMUSG00000021131	Erh	65.9	108.9	0.64	0.00839728	0.251836	65.9	108.9	0.62	0.0220815	0.414121	12	80634022	80644341	2618	43.67	-1	protein_coding	Enhancer of rudimentary homolog [Source:UniProtKB/Swiss-Prot;Acc:P84089]
ENSMUSG00000023882	Zfp54	28.4	60.2	0.64	0.0875737	0.758181	28.4	60.2	0.69	0.0791474	0.664263	17	21423227	21435640	2832	38.1	1	protein_coding	zinc finger protein 54 [Source:MGI Symbol;Acc:MGI:99201]
ENSMUSG00000024048	Myl12a	431.5	686.6	0.64	0.000170055	0.0198804	431.5	686.6	0.61	0.00118491	0.0803267	17	70993656	71002878	3201	44.8	-1	protein_coding
ENSMUSG00000024661	Fth1	6251.4	10049.6	0.64	0.000395654	0.0375288	6251.4	10049.6	0.61	0.00154339	0.0971313	19	9982703	9985092	866	49.83	1	protein_coding	Ferritin heavy chain Ferritin heavy chain, N-terminally processed [Source:UniProtKB/Swiss-Prot;Acc:P09528]
ENSMUSG00000026683	Nuf2	26.9	54.6	0.64	0.0842797	0.751281	26.9	54.6	0.51	0.187842	0.840035	1	169497934	169531464	6341	42.47	-1	protein_coding	Mus musculus NUF2, NDC80 kinetochore complex component (Nuf2), transcript variant 2, mRNA. [Source:RefSeq mRNA;Acc:NM_001355159]
ENSMUSG00000027935	Rab13	18.1	33.1	0.64	0.0561881	0.598895	18.1	33.1	0.62	0.0891088	0.705137	3	90213695	90226385	2300	47.31	1	protein_coding	Ras-related protein Rab-13 [Source:UniProtKB/Swiss-Prot;Acc:Q9DD03]
ENSMUSG00000028126	Pip5k1a	75.9	128.2	0.64	0.0163943	0.355789	75.9	128.2	0.82	0.00138261	0.0933449	3	95058530	95106930	4383	42.96	-1	protein_coding	Phosphatidylinositol 4-phosphate 5-kinase type-1 alpha [Source:UniProtKB/Swiss-Prot;Acc:P70182]
ENSMUSG00000031134	Rbmx	121.1	210.8	0.64	0.0297198	0.458661	121.1	210.8	0.74	0.00796898	0.251781	X	57383530	57393036	4330	40.96	-1	protein_coding	RNA binding motif protein, X chromosome [Source:MGI Symbol;Acc:MGI:1343044]
ENSMUSG00000031278	Acsl4	92	162.1	0.64	0.0424673	0.53816	92	162.1	0.57	0.068233	0.642264	X	142317993	142390535	5405	38.88	-1	protein_coding	Long-chain-fatty-acid--CoA ligase 4 [Source:UniProtKB/Swiss-Prot;Acc:Q9QUJ7]
ENSMUSG00000031832	Taf1c	4.3	16.7	0.64	0.0778538	0.772922	4.3	16.7	0.8	0.0475562	0.780799	8	119597871	119605222	3490	57.34	-1	protein_coding	TATA box-binding protein-associated factor RNA polymerase I subunit C [Source:UniProtKB/Swiss-Prot;Acc:Q6PDZ2]
ENSMUSG00000033669	Zfp7	31.9	58.4	0.64	0.0553185	0.597598	31.9	58.4	0.67	0.0624139	0.643667	15	76879259	76892395	5816	46.46	1	protein_coding	zinc finger protein 7 [Source:MGI Symbol;Acc:MGI:99208]
ENSMUSG00000035578	Iqcg	4.5	13.1	0.64	0.088194	0.889123	4.5	13.1	0.64	0.114071	0.918367	16	33015385	33056218	3462	44.7	-1	protein_coding	IQ domain-containing protein G [Source:UniProtKB/Swiss-Prot;Acc:Q80W32]
ENSMUSG00000035778	Ggta1	5.2	12.9	0.64	0.0918464	0.992216	5.2	12.9	0.56	0.171188	0.97428	2	35400179	35463231	4709	47.96	-1	protein_coding	N-acetyllactosaminide alpha-1,3-galactosyltransferase [Source:UniProtKB/Swiss-Prot;Acc:P23336]
ENSMUSG00000035930	Chst4	21.1	64.5	0.64	0.0857625	0.690647	21.1	64.5	0.66	0.105477	0.73761	8	110029153	110039740	2282	48.79	-1	protein_coding	carbohydrate sulfotransferase 4 [Source:HGNC Symbol;Acc:HGNC:1972]
ENSMUSG00000038387	Rras	17.6	32.3	0.64	0.0623518	0.725864	17.6	32.3	0.61	0.101301	0.776405	7	45017961	45021647	1121	54.79	1	protein_coding	related RAS viral (r-ras) oncogene [Source:MGI Symbol;Acc:MGI:98179]
ENSMUSG00000041886	Macc1	13.1	32.3	0.64	0.0931168	0.82521	13.1	32.3	0.62	0.131843	0.800269	12	119314270	119469987	8406	37.12	1	protein_coding	MACC1, MET transcriptional regulator [Source:HGNC Symbol;Acc:HGNC:30215]
ENSMUSG00000041907	Gpr45	1.9	11.6	0.64	0.0596694	0.993235	1.9	11.6	0.72	0.0568435	0.808197	1	42952872	43035456	7238	42.75	1	protein_coding	Probable G-protein coupled receptor 45 [Source:UniProtKB/Swiss-Prot;Acc:Q9EQQ4]
ENSMUSG00000059970	Hspa2	12.7	29.4	0.64	0.0891901	0.813369	12.7	29.4	0.67	0.0990684	0.747105	12	76404176	76406938	2644	54.43	1	protein_coding	Heat shock-related 70 kDa protein 2 [Source:UniProtKB/Swiss-Prot;Acc:P17156]
ENSMUSG00000064193	Gm4735	1.5	5.3	0.64	0.0792225	1	1.5	5.3	0.62	0.113176	1	2	80837141	80838442	1302	55.61	1	processed_pseudogene	predicted gene 4735 [Source:MGI Symbol;Acc:MGI:3645521]
ENSMUSG00000079491	H2-T10	6.7	15	0.64	0.0876822	0.990501	6.7	15	0.6	0.136616	0.958166	17	36115876	36121465	3419	50.04	-1	polymorphic_pseudogene	histocompatibility 2, T region locus 10 [Source:MGI Symbol;Acc:MGI:95942]
ENSMUSG00000082279	Gm12870	5.1	15.2	0.64	0.0894057	0.827687	5.1	15.2	0.87	0.0337749	0.704639	4	107327484	107328499	1016	52.17	-1	processed_pseudogene	predicted gene 12870 [Source:MGI Symbol;Acc:MGI:3649408]
ENSMUSG00000111528	Gm39460	1.3	5.7	0.64	0.069317	1	1.3	5.7	0.62	0.103821	1	9	120879697	120881972	1266	50.31	-1	lincRNA	predicted gene, 39460 [Source:MGI Symbol;Acc:MGI:5622345]
ENSMUSG00000114496	Gm47601	5.5	16.5	0.64	0.0890337	0.80353	5.5	16.5	0.73	0.0732418	0.857099	14	22927926	22933500	2174	41.38	1	sense_intronic	predicted gene, 47601 [Source:MGI Symbol;Acc:MGI:6096654]
ENSMUSG00000006720	Zfp184	9.6	24.2	0.63	0.0940572	0.80704	9.6	24.2	0.73	0.0757016	0.724395	13	21945094	21960779	3513	41.78	1	protein_coding	zinc finger protein 184 (Kruppel-like) [Source:MGI Symbol;Acc:MGI:1922244]
ENSMUSG00000019528	Gyg	79.1	130	0.63	0.00912236	0.268316	79.1	130	0.61	0.0223835	0.415305	3	20122084	20155317	2344	42.34	-1	protein_coding	glycogenin [Source:MGI Symbol;Acc:MGI:1351614]
ENSMUSG00000020092	Pald1	8.2	17	0.63	0.0928939	0.843544	8.2	17	0.64	0.112896	0.923491	10	61319656	61383530	4535	51.76	-1	protein_coding	phosphatase domain containing, paladin 1 [Source:HGNC Symbol;Acc:HGNC:23530]
ENSMUSG00000022033	Pbk	111.6	190.7	0.63	0.032307	0.471924	111.6	190.7	0.64	0.0419712	0.547052	14	65805837	65817822	1791	40.74	1	protein_coding	Lymphokine-activated killer T-cell-originated protein kinase [Source:UniProtKB/Swiss-Prot;Acc:Q9JJ78]
ENSMUSG00000022913	Psmg1	120.5	196.3	0.63	0.00628439	0.219754	120.5	196.3	0.64	0.0110088	0.310158	16	95979933	95990960	1344	45.1	-1	protein_coding	Proteasome assembly chaperone 1 [Source:UniProtKB/Swiss-Prot;Acc:Q9JK23]
ENSMUSG00000024350	Dnajc18	46.8	78	0.63	0.018329	0.375669	46.8	78	0.62	0.0361199	0.498731	18	35671103	35703144	5169	44.36	-1	protein_coding	DnaJ homolog subfamily C member 18 [Source:UniProtKB/Swiss-Prot;Acc:Q9CZJ9]
ENSMUSG00000028044	Cks1b	100.9	184.3	0.63	0.0622465	0.631203	100.9	184.3	0.5	0.13801	0.796155	3	89415472	89418383	1126	46.81	-1	protein_coding	Cyclin-dependent kinases regulatory subunit 1 [Source:UniProtKB/Swiss-Prot;Acc:P61025]
ENSMUSG00000029581	Fscn1	0	8.8	0.63	0.0310166	1	0	8.8	0.67	0.0381358	1	5	142960343	142973185	3012	54.42	1	protein_coding	Fascin [Source:UniProtKB/Swiss-Prot;Acc:Q61553]
ENSMUSG00000031312	Itgb1bp2	2.6	12.8	0.63	0.0709528	0.993235	2.6	12.8	0.91	0.0239139	0.626737	X	101449088	101453541	1799	45.98	1	protein_coding	Integrin beta-1-binding protein 2 [Source:UniProtKB/Swiss-Prot;Acc:Q9R000]
ENSMUSG00000031781	Ciapin1	54	95	0.63	0.0440436	0.540807	54	95	0.66	0.0474669	0.554644	8	94819804	94838358	9212	47.22	-1	protein_coding	Anamorsin [Source:UniProtKB/Swiss-Prot;Acc:Q8WTY4]
ENSMUSG00000033022	Cdo1	189.1	306.6	0.63	0.00622644	0.21928	189.1	306.6	0.6	0.0168957	0.370273	18	46713205	46728342	1530	42.36	-1	protein_coding	Cysteine dioxygenase type 1 [Source:UniProtKB/Swiss-Prot;Acc:P60334]
ENSMUSG00000034108	Ccs	45.7	79.6	0.63	0.0372912	0.502918	45.7	79.6	0.8	0.00617814	0.215678	19	4825366	4839322	1057	47.14	-1	protein_coding	Copper chaperone for superoxide dismutase [Source:UniProtKB/Swiss-Prot;Acc:Q9WU84]
ENSMUSG00000035105	Egln3	7.9	20.1	0.63	0.0960699	0.81895	7.9	20.1	0.64	0.114416	0.928684	12	54178981	54203860	2662	45.88	-1	protein_coding	egl-9 family hypoxia inducible factor 3 [Source:HGNC Symbol;Acc:HGNC:14661]
ENSMUSG00000037940	Inpp4b	9.4	19.3	0.63	0.0848886	0.829338	9.4	19.3	0.66	0.0959091	0.899619	8	81342556	82127914	13066	38.64	1	protein_coding	Type II inositol 3,4-bisphosphate 4-phosphatase [Source:UniProtKB/Swiss-Prot;Acc:Q6P1Y8]
ENSMUSG00000038528	Mfsd4b5	0.3	5.7	0.63	0.0427833	1	0.3	5.7	0.7	0.0423433	1	10	39958061	39986646	6027	44.08	-1	protein_coding
ENSMUSG00000038545	Cul7	14.5	32.3	0.63	0.0939896	0.804308	14.5	32.3	0.66	0.102106	0.728801	17	46650337	46664364	7410	55.1	1	protein_coding	Cullin-7 [Source:UniProtKB/Swiss-Prot;Acc:Q8VE73]
ENSMUSG00000041632	Mrps27	35.4	59.6	0.63	0.0240651	0.417084	35.4	59.6	0.58	0.0550581	0.596159	13	99344786	99415562	2093	45.18	1	protein_coding	28S ribosomal protein S27, mitochondrial [Source:UniProtKB/Swiss-Prot;Acc:Q8BK72]
ENSMUSG00000042684	Npl	0.5	8.4	0.63	0.042771	1	0.5	8.4	0.64	0.0585443	1	1	153503015	153550045	2961	45.66	-1	protein_coding	N-acetylneuraminate lyase [Source:UniProtKB/Swiss-Prot;Acc:Q9DCJ9]
ENSMUSG00000043051	Disc1	19.6	34.8	0.63	0.0499733	0.581583	19.6	34.8	0.62	0.0808599	0.689762	8	125054195	125261858	3804	48.06	1	protein_coding	Disrupted in schizophrenia 1 homolog [Source:UniProtKB/Swiss-Prot;Acc:Q811T9]
ENSMUSG00000044434	Gm9791	22.2	51.1	0.63	0.0945286	0.805023	22.2	51.1	0.65	0.109298	0.763359	3	34005017	34005463	447	59.73	-1	processed_pseudogene	predicted pseudogene 9791 [Source:MGI Symbol;Acc:MGI:3642317]
ENSMUSG00000044906	4930503L19Rik	24.6	46.3	0.63	0.0740269	0.779277	24.6	46.3	0.61	0.100852	0.775496	18	70452212	70472509	3611	39.09	-1	protein_coding	RIKEN cDNA 4930503L19 gene [Source:MGI Symbol;Acc:MGI:1922045]
ENSMUSG00000045216	Hs6st1	14.4	28.8	0.63	0.0815804	0.789424	14.4	28.8	0.65	0.0961045	0.740883	1	36068400	36106446	5542	51.85	1	protein_coding	Heparan-sulfate 6-O-sulfotransferase 1 [Source:UniProtKB/Swiss-Prot;Acc:Q9QYK5]
ENSMUSG00000045319	Proser2	50.6	90.8	0.63	0.0498951	0.577081	50.6	90.8	0.77	0.0180142	0.372442	2	6097607	6130211	9563	46.84	-1	protein_coding	Proline and serine-rich protein 2 [Source:UniProtKB/Swiss-Prot;Acc:Q8C5R2]
ENSMUSG00000069631	Strada	20.6	38.4	0.63	0.0634717	0.728619	20.6	38.4	0.79	0.0209265	0.411095	11	106163330	106202168	5569	45.02	-1	protein_coding	STE20-related kinase adapter protein alpha [Source:UniProtKB/Swiss-Prot;Acc:Q3UUJ4]
ENSMUSG00000078920	Ifi47	66.2	119.5	0.63	0.0602158	0.620202	66.2	119.5	0.41	0.193443	0.838692	11	49076587	49096974	2473	42.63	1	protein_coding
ENSMUSG00000078995	Zfp456	5.8	14.8	0.63	0.0982453	0.843544	5.8	14.8	0.73	0.0713231	0.834331	13	67362113	67375810	4634	40.03	-1	protein_coding	zinc finger protein 456 [Source:MGI Symbol;Acc:MGI:3040694]
ENSMUSG00000082809	Gm14150	5.9	12.3	0.63	0.0884159	0.835052	5.9	12.3	0.63	0.116267	0.91998	2	151458956	151460309	1354	53.91	1	processed_pseudogene	predicted gene 14150 [Source:MGI Symbol;Acc:MGI:3651006]
ENSMUSG00000090394	4930523C07Rik	31.9	57.1	0.63	0.0447314	0.544069	31.9	57.1	0.7	0.0368642	0.499551	1	160044382	160080208	10195	44.53	1	protein_coding	RIKEN cDNA 4930523C07 gene [Source:MGI Symbol;Acc:MGI:1914897]
ENSMUSG00000092086	Gm6793	1	4.6	0.63	0.0740907	1	1	4.6	0.66	0.0847027	1	8	112013433	112015036	1604	43.83	-1	protein_coding
ENSMUSG00000092284	Gm8801	0.8	7.5	0.63	0.0534841	1	0.8	7.5	0.79	0.0359523	1	17	35947246	35952297	1064	43.82	1	unprocessed_pseudogene	predicted gene 8801 [Source:MGI Symbol;Acc:MGI:3779813]
ENSMUSG00000097657	Gm7389	13.5	28.1	0.63	0.087234	0.807186	13.5	28.1	0.67	0.082373	0.690492	8	3994626	3997509	2884	47.61	1	processed_pseudogene	predicted gene 7389 [Source:MGI Symbol;Acc:MGI:3645153]
ENSMUSG00000097703	Gm26623	76.2	125	0.63	0.0124337	0.311353	76.2	125	0.6	0.0298163	0.471341	12	83620210	83621174	850	45.28	1	lincRNA	predicted gene, 26623 [Source:MGI Symbol;Acc:MGI:5477117]
ENSMUSG00000106963	Gm8675	1.5	6.4	0.63	0.0776394	1	1.5	6.4	0.69	0.0756641	1	5	151007446	151009301	1856	44.56	-1	processed_pseudogene	predicted gene 8675 [Source:MGI Symbol;Acc:MGI:3646578]
ENSMUSG00000108218	Olfr1372-ps1	2.6	11.8	0.63	0.0705458	0.993235	2.6	11.8	0.65	0.0876573	1	11	52154722	52168159	9812	47.3	-1	transcribed_unprocessed_pseudogene	olfactory receptor 1372, pseudogene 1 [Source:MGI Symbol;Acc:MGI:3031206]
ENSMUSG00000110617	Gm5910	5	12.3	0.63	0.0963338	0.903907	5	12.3	0.78	0.0545259	0.808197	8	83477471	83479216	1746	51.83	-1	processed_pseudogene	predicted gene 5910 [Source:MGI Symbol;Acc:MGI:3646687]
ENSMUSG00000004110	Cacna1e	2.9	11.8	0.62	0.0834034	1	2.9	11.8	0.76	0.0570646	0.994375	1	154390731	154884501	25228	43.34	-1	protein_coding	calcium voltage-gated channel subunit alpha1 E [Source:HGNC Symbol;Acc:HGNC:1392]
ENSMUSG00000022707	Gbe1	43.9	78.1	0.62	0.0570293	0.605738	43.9	78.1	0.67	0.051682	0.590547	16	70313949	70569716	5352	38.6	1	protein_coding	1,4-alpha-glucan-branching enzyme [Source:UniProtKB/Swiss-Prot;Acc:Q9D6Y9]
ENSMUSG00000024421	Lama3	1	4.7	0.62	0.0742354	1	1	4.7	0.59	0.118265	1	18	12333819	12583013	10745	44.7	1	protein_coding	Mus musculus laminin, alpha 3 (Lama3), transcript variant 2, mRNA. [Source:RefSeq mRNA;Acc:NM_001347461]
ENSMUSG00000025324	Atp10a	13	25.8	0.62	0.0912376	0.806164	13	25.8	0.62	0.119172	0.757473	7	58656166	58829420	5587	42.64	1	protein_coding	Probable phospholipid-transporting ATPase VA [Source:UniProtKB/Swiss-Prot;Acc:O54827]
ENSMUSG00000026278	Bok	28.2	48.5	0.62	0.0481975	0.576423	28.2	48.5	0.58	0.0923925	0.694863	1	93685660	93695764	1840	53.59	1	protein_coding	Bcl-2-related ovarian killer protein [Source:UniProtKB/Swiss-Prot;Acc:O35425]
ENSMUSG00000026355	Mcm6	172	287.4	0.62	0.0253379	0.425671	172	287.4	0.8	0.00208417	0.11874	1	128331590	128359664	4666	42.72	-1	protein_coding	DNA replication licensing factor MCM6 [Source:UniProtKB/Swiss-Prot;Acc:P97311]
ENSMUSG00000027225	Duoxa2	1.1	7	0.62	0.0625333	1	1.1	7	0.61	0.0872035	1	2	122298900	122302885	1592	53.29	1	protein_coding	Dual oxidase maturation factor 2 [Source:UniProtKB/Swiss-Prot;Acc:Q9D311]
ENSMUSG00000028613	Lrp8	14.5	37.8	0.62	0.101744	0.728619	14.5	37.8	0.83	0.0401006	0.553995	4	107802261	107876840	10514	51.32	1	protein_coding	Low-density lipoprotein receptor-related protein 8 [Source:UniProtKB/Swiss-Prot;Acc:Q924X6]
ENSMUSG00000029082	Bst1	0.3	5.7	0.62	0.0437482	1	0.3	5.7	0.71	0.0401067	1	5	43818885	43843986	3317	44.65	1	protein_coding	bone marrow stromal cell antigen 1 [Source:HGNC Symbol;Acc:HGNC:1118]
ENSMUSG00000029201	Ugdh	161.7	258	0.62	0.00440365	0.177832	161.7	258	0.54	0.0182397	0.385006	5	65413221	65435949	6752	44.19	-1	protein_coding	UDP-glucose dehydrogenase [Source:MGI Symbol;Acc:MGI:1306785]
ENSMUSG00000031171	Ftsj1	63	106.3	0.62	0.0274217	0.438501	63	106.3	0.78	0.00252762	0.137219	X	8238668	8252406	4760	46.65	-1	protein_coding	FtsJ RNA methyltransferase homolog 1 [Source:HGNC Symbol;Acc:HGNC:13254]
ENSMUSG00000031969	Acad8	79.4	149.2	0.62	0.0785138	0.677991	79.4	149.2	0.71	0.0457891	0.545044	9	26974135	26999566	4143	42.48	-1	protein_coding	acyl-Coenzyme A dehydrogenase family, member 8 [Source:MGI Symbol;Acc:MGI:1914198]
ENSMUSG00000032766	Gng11	78.8	128.3	0.62	0.00854269	0.253709	78.8	128.3	0.6	0.0217257	0.40685	6	4003904	4008445	919	43.17	1	protein_coding	guanine nucleotide binding protein (G protein), gamma 11 [Source:MGI Symbol;Acc:MGI:1913316]
ENSMUSG00000034311	Kif4	40	68.2	0.62	0.0387859	0.509963	40	68.2	0.55	0.0923543	0.716424	X	100625737	100727214	5514	40.23	1	protein_coding	Chromosome-associated kinesin KIF4 [Source:UniProtKB/Swiss-Prot;Acc:P33174]
ENSMUSG00000038155	Gstp2	19.5	34.8	0.62	0.0638285	0.637129	19.5	34.8	0.58	0.113587	0.757473	19	4040285	4042236	770	55.74	-1	protein_coding	Glutathione S-transferase P 2 [Source:UniProtKB/Swiss-Prot;Acc:P46425]
ENSMUSG00000039252	Lgi2	0.7	7.2	0.62	0.0522084	1	0.7	7.2	0.71	0.0525946	1	5	52533517	52566462	6528	47.13	-1	protein_coding	Leucine-rich repeat LGI family member 2 [Source:UniProtKB/Swiss-Prot;Acc:Q8K4Z0]
ENSMUSG00000042709	Atpaf2	41.7	71.7	0.62	0.0393455	0.512161	41.7	71.7	0.68	0.0316281	0.501034	11	60400626	60418457	2137	46.65	-1	protein_coding	ATP synthase mitochondrial F1 complex assembly factor 2 [Source:HGNC Symbol;Acc:HGNC:18802]
ENSMUSG00000046556	Zfp319	21.2	42.4	0.62	0.0893987	0.700862	21.2	42.4	0.78	0.0329939	0.529238	8	95323011	95331950	7232	54.77	-1	protein_coding	zinc finger protein 319 [Source:MGI Symbol;Acc:MGI:1890618]
ENSMUSG00000050188	Lsm10	45.6	74.5	0.62	0.0141781	0.332981	45.6	74.5	0.63	0.0251458	0.46543	4	126096623	126098584	943	51.38	1	protein_coding	U7 snRNP-specific Sm-like protein LSM10 [Source:MGI Symbol;Acc:MGI:2151045]
ENSMUSG00000050555	Hyls1	15.3	31.8	0.62	0.0911022	0.80353	15.3	31.8	0.69	0.0826591	0.724395	9	35560820	35570398	5970	40.28	-1	protein_coding	HYLS1, centriolar and ciliogenesis associated [Source:HGNC Symbol;Acc:HGNC:26558]
ENSMUSG00000050854	Tmem125	48	89.9	0.62	0.0759934	0.671728	48	89.9	0.65	0.076482	0.675626	4	118540941	118544044	2339	56.28	-1	protein_coding	Transmembrane protein 125 [Source:UniProtKB/Swiss-Prot;Acc:Q8CHQ6]
ENSMUSG00000052912	Smarca5-ps	10.9	19.9	0.62	0.074061	0.700862	10.9	19.9	0.58	0.131288	0.771998	4	145464204	145467420	3217	41.93	1	transcribed_processed_pseudogene	SWI/SNF related, matrix associated, actin depenent ragulator of chromatin, subfamily a, member 5, pseudogene [Source:MGI Symbol;Acc:MGI:2443330]
ENSMUSG00000055148	Klf2	23.8	43.1	0.62	0.0702054	0.765854	23.8	43.1	0.62	0.0934317	0.763359	8	72319033	72321656	1847	60.52	1	protein_coding	Krueppel-like factor 2 [Source:UniProtKB/Swiss-Prot;Acc:Q60843]
ENSMUSG00000066571	4931406P16Rik	15.8	31.7	0.62	0.0936299	0.806164	15.8	31.7	0.63	0.114615	0.788054	7	34236707	34313551	8239	42.74	-1	protein_coding	RIKEN cDNA 4931406P16 gene [Source:MGI Symbol;Acc:MGI:1924311]
ENSMUSG00000066705	Fxyd6	28.5	55.6	0.62	0.0875926	0.69961	28.5	55.6	0.63	0.101368	0.714556	9	45370185	45396159	4107	49.43	1	protein_coding	FXYD domain-containing ion transport regulator 6 [Source:UniProtKB/Swiss-Prot;Acc:Q9D164]
ENSMUSG00000070867	Trabd2b	1.8	7	0.62	0.0838962	1	1.8	7	0.6	0.115011	1	4	114406724	114615098	6617	46.8	1	protein_coding	Metalloprotease TIKI2 [Source:UniProtKB/Swiss-Prot;Acc:B1ATG9]
ENSMUSG00000072893	4933439C10Rik	22.3	39.7	0.62	0.055986	0.607069	22.3	39.7	0.75	0.0247923	0.447403	11	59505662	59513647	5616	50.8	1	processed_transcript	RIKEN cDNA 4933439C10 gene [Source:MGI Symbol;Acc:MGI:1921726]
ENSMUSG00000075602	Ly6a	1.9	47.4	0.62	0.0389942	0.652758	1.9	47.4	0.64	0.0525611	0.640304	15	74994877	74998031	1205	48.87	-1	protein_coding	Lymphocyte antigen 6A-2/6E-1 [Source:UniProtKB/Swiss-Prot;Acc:P05533]
ENSMUSG00000081111	Gm5913	9.2	18.4	0.62	0.0885426	0.82521	9.2	18.4	0.75	0.0514601	0.790956	8	97427712	97429110	1399	53.61	-1	processed_pseudogene	predicted gene 5913 [Source:MGI Symbol;Acc:MGI:3648292]
ENSMUSG00000085783	Gm9816	27.7	53.4	0.62	0.0821603	0.684353	27.7	53.4	0.65	0.0885299	0.687663	16	62717037	62718450	1414	53.32	1	processed_pseudogene	predicted pseudogene 9816 [Source:MGI Symbol;Acc:MGI:3704465]
ENSMUSG00000108067	Gm43953	5.1	20.7	0.62	0.0803396	0.781687	5.1	20.7	0.77	0.0559525	0.800269	6	101325339	101328205	2867	43.74	-1	TEC	predicted gene, 43953 [Source:MGI Symbol;Acc:MGI:5690345]
ENSMUSG00000108389	Gm45206	1.9	8.3	0.62	0.0805473	1	1.9	8.3	0.72	0.0675818	1	7	80209394	80211678	2285	47.09	1	TEC	predicted gene 45206 [Source:MGI Symbol;Acc:MGI:5753782]
ENSMUSG00000115340	AC144772.1	1.6	8.4	0.62	0.0731848	1	1.6	8.4	0.64	0.0890136	1	15	35855394	35857791	2398	42.95	1	TEC
ENSMUSG00000115523	AC154239.2	3.6	8.5	0.62	0.0992341	0.912322	3.6	8.5	0.58	0.155826	1	14	33213160	33213392	233	49.79	1	processed_pseudogene
ENSMUSG00000000078	Klf6	319	506.9	0.61	0.00649901	0.220257	319	506.9	0.58	0.0162097	0.352031	13	5861482	5870394	4391	43.44	1	protein_coding	Kruppel like factor 6 [Source:HGNC Symbol;Acc:HGNC:2235]
ENSMUSG00000020572	Nampt	152.8	247.7	0.61	0.016187	0.353686	152.8	247.7	0.53	0.036418	0.501034	12	32819545	32853349	5054	41.77	1	protein_coding	Nicotinamide phosphoribosyltransferase [Source:UniProtKB/Swiss-Prot;Acc:Q99KQ4]
ENSMUSG00000020914	Top2a	476	837	0.61	0.0603342	0.632394	476	837	0.52	0.114948	0.739224	11	98992943	99024189	9013	41.38	-1	protein_coding	DNA topoisomerase 2-alpha [Source:UniProtKB/Swiss-Prot;Acc:Q01320]
ENSMUSG00000021179	Nrde2	23.9	44.6	0.61	0.0822115	0.745488	23.9	44.6	0.72	0.0486901	0.58842	12	100125452	100159653	4196	47.38	-1	protein_coding	isoform b [Source:RefSeq peptide;Acc:NP_898978]
ENSMUSG00000021732	Fgf10	1	15.9	0.61	#N/A	#N/A	1	15.9	1.03	0.00728708	0.40204	13	118669791	118792115	4601	37.11	1	protein_coding	Fibroblast growth factor 10 [Source:UniProtKB/Swiss-Prot;Acc:O35565]
ENSMUSG00000025085	Ablim1	67.8	113.5	0.61	0.0375257	0.502918	67.8	113.5	0.67	0.0306895	0.46543	19	57032733	57314919	11949	45.76	-1	protein_coding	actin-binding LIM protein 1 [Source:MGI Symbol;Acc:MGI:1194500]
ENSMUSG00000025854	Fam20c	15.1	31	0.61	0.100084	0.759299	15.1	31	0.64	0.102689	0.730171	5	138754514	138810077	6590	51.32	1	protein_coding	Extracellular serine/threonine protein kinase FAM20C [Source:UniProtKB/Swiss-Prot;Acc:Q5MJS3]
ENSMUSG00000025880	Smad7	46.5	86.4	0.61	0.0878427	0.695241	46.5	86.4	0.39	0.282897	0.904874	18	75367529	75395935	4521	51.85	1	protein_coding	SMAD family member 7 [Source:MGI Symbol;Acc:MGI:1100518]
ENSMUSG00000027469	Tpx2	43.8	86.3	0.61	0.0942039	0.707399	43.8	86.3	0.52	0.180468	0.833938	2	152847964	152895321	4677	42.39	1	protein_coding	Targeting protein for Xklp2 [Source:UniProtKB/Swiss-Prot;Acc:A2APB8]
ENSMUSG00000028431	Ikbkap	71.4	117.5	0.61	0.0217266	0.402799	71.4	117.5	0.61	0.0351034	0.494119	4	56749680	56802331	7399	43.56	-1	protein_coding	inhibitor of kappa light polypeptide enhancer in B cells, kinase complex-associated protein [Source:MGI Symbol;Acc:MGI:1914544]
ENSMUSG00000030844	Rgs10	0.3	7.6	0.61	0.0433073	1	0.3	7.6	0.62	0.0564971	1	7	128373621	128418758	1711	48.17	-1	protein_coding	regulator of G-protein signalling 10 [Source:MGI Symbol;Acc:MGI:1915115]
ENSMUSG00000032135	Mcam	3.9	9.7	0.61	0.107258	1	3.9	9.7	0.65	0.111651	0.932079	9	44134469	44142727	3350	54.39	1	protein_coding	Cell surface glycoprotein MUC18 [Source:UniProtKB/Swiss-Prot;Acc:Q8R2Y2]
ENSMUSG00000037617	Spag1	16	32.9	0.61	0.0979202	0.784664	16	32.9	0.69	0.076779	0.667391	15	36178099	36235621	11167	46.26	1	protein_coding	Sperm-associated antigen 1 [Source:UniProtKB/Swiss-Prot;Acc:Q80ZX8]
ENSMUSG00000039901	9130011E15Rik	4.5	13.6	0.61	0.0988708	0.856982	4.5	13.6	0.55	0.171323	0.971591	19	45818144	45998488	2896	43.93	-1	protein_coding	UPF0668 [Source:UniProtKB/Swiss-Prot;Acc:Q6PD19]
ENSMUSG00000040466	Blvrb	154.4	253.6	0.61	0.0201253	0.389025	154.4	253.6	0.63	0.0276585	0.46543	7	27447978	27466144	2782	46.23	1	protein_coding	Flavin reductase (NADPH) [Source:UniProtKB/Swiss-Prot;Acc:Q923D2]
ENSMUSG00000040550	Otud6b	79.2	126.3	0.61	0.00595286	0.214233	79.2	126.3	0.67	0.00452572	0.184079	4	14809498	14826587	3387	39.87	-1	protein_coding	OTU domain containing 6B [Source:HGNC Symbol;Acc:HGNC:24281]
ENSMUSG00000041406	BC055324	9.4	26	0.61	0.105519	0.832654	9.4	26	0.66	0.106605	0.73874	1	163945993	163994796	4148	38.59	-1	protein_coding	Mus musculus (BC055324), transcript variant 2, mRNA. [Source:RefSeq mRNA;Acc:NM_001357049]
ENSMUSG00000041429	Nthl1	4.5	10.5	0.61	0.107834	0.922462	4.5	10.5	0.6	0.140056	0.946841	17	24632682	24638838	1080	52.85	1	protein_coding	nth (endonuclease III)-like 1 (E.coli) [Source:MGI Symbol;Acc:MGI:1313275]
ENSMUSG00000046432	Bex3	238.5	389.2	0.61	0.0182112	0.378606	238.5	389.2	0.62	0.0260303	0.455505	X	136270253	136271978	973	58.86	1	protein_coding	Protein BEX3 [Source:UniProtKB/Swiss-Prot;Acc:Q9WTZ9]
ENSMUSG00000051147	Nat2	41.1	74.3	0.61	0.0689106	0.652965	41.1	74.3	0.65	0.0652787	0.635058	8	67494858	67502584	1522	40.03	1	protein_coding	N-acetyltransferase 2 (arylamine N-acetyltransferase) [Source:MGI Symbol;Acc:MGI:109201]
ENSMUSG00000052833	Sae1	112.2	182.3	0.61	0.0141782	0.338809	112.2	182.3	0.68	0.00585926	0.215678	7	16320234	16387806	2597	45.41	-1	protein_coding	SUMO-activating enzyme subunit 1 SUMO-activating enzyme subunit 1, N-terminally processed [Source:UniProtKB/Swiss-Prot;Acc:Q9R1T2]
ENSMUSG00000053980	Gm9930	16.5	33.1	0.61	0.0982502	0.716298	16.5	33.1	0.71	0.0693303	0.659639	10	9532531	9535681	3151	41.26	-1	TEC
ENSMUSG00000057614	Gnai1	8.7	23.1	0.61	0.106411	0.831195	8.7	23.1	0.67	0.101912	0.751645	5	18265135	18360355	3135	40.87	-1	protein_coding	guanine nucleotide binding protein (G protein), alpha inhibiting 1 [Source:MGI Symbol;Acc:MGI:95771]
ENSMUSG00000057751	Megf6	1.2	5.2	0.61	0.0840573	1	1.2	5.2	0.67	0.080661	1	4	154170730	154275713	7877	53.84	1	protein_coding	multiple EGF like domains 6 [Source:HGNC Symbol;Acc:HGNC:3232]
ENSMUSG00000059852	Kcng2	1.6	7.9	0.61	0.0788215	1	1.6	7.9	0.77	0.0490889	1	18	80294546	80364254	2989	48.8	-1	protein_coding	potassium voltage-gated channel modifier subfamily G member 2 [Source:HGNC Symbol;Acc:HGNC:6249]
ENSMUSG00000062588	Gm6104	22.6	39.1	0.61	0.0547048	0.596063	22.6	39.1	0.55	0.1119	0.757228	1	4880049	4880651	603	44.94	-1	processed_pseudogene	predicted gene 6104 [Source:MGI Symbol;Acc:MGI:3648587]
ENSMUSG00000070522	Gm6505	5	13.3	0.61	0.105516	0.862585	5	13.3	0.61	0.129933	0.948582	3	28764713	28765360	648	48.92	-1	processed_pseudogene	predicted pseudogene 6505 [Source:MGI Symbol;Acc:MGI:3648080]
ENSMUSG00000086075	Gm15728	2.6	9.4	0.61	0.0921412	1	2.6	9.4	0.65	0.098249	0.897427	5	117389139	117393498	3561	46.22	1	lincRNA	predicted gene 15728 [Source:MGI Symbol;Acc:MGI:3783171]
ENSMUSG00000096579	Gm17121	0.3	3.5	0.61	0.0533527	1	0.3	3.5	0.58	0.0812801	1	14	7565259	7566105	847	45.1	1	processed_pseudogene	predicted gene 17121 [Source:MGI Symbol;Acc:MGI:4937948]
ENSMUSG00000096935	1700113A16Rik	11.4	22.7	0.61	0.095419	0.805832	11.4	22.7	0.63	0.107102	0.739024	3	88171556	88177785	1095	47.67	-1	antisense	RIKEN cDNA 1700113A16 gene [Source:MGI Symbol;Acc:MGI:1923892]
ENSMUSG00000100235	Gm28557	0.4	6	0.61	0.0490338	1	0.4	6	0.6	0.0714011	1	13	67069399	67108604	5072	40.51	-1	protein_coding
ENSMUSG00000106885	Eif3s6-ps4	18.9	32.4	0.61	0.0515778	0.590595	18.9	32.4	0.61	0.0787383	0.681817	6	19317215	19319378	1388	39.83	-1	processed_pseudogene	eukaryotic translation initiation factor 3, subunit 6, pseudogene 4 [Source:MGI Symbol;Acc:MGI:103210]
ENSMUSG00000112808	Gm4739	80.7	139.3	0.61	0.055416	0.597598	80.7	139.3	0.5	0.126198	0.757473	10	26107789	26108421	633	48.34	1	processed_pseudogene	predicted gene 4739 [Source:MGI Symbol;Acc:MGI:3642984]
ENSMUSG00000113349	Gm48369	2.3	7.8	0.61	0.0960083	1	2.3	7.8	0.64	0.107252	1	12	36146183	36147922	1740	40.52	-1	TEC	predicted gene, 48369 [Source:MGI Symbol;Acc:MGI:6097840]
ENSMUSG00000003200	Sh3gl1	37	65.3	0.6	0.0679281	0.645395	37	65.3	0.74	0.0300293	0.46543	17	56016753	56036637	2072	53.59	-1	protein_coding	SH3-domain GRB2-like 1 [Source:MGI Symbol;Acc:MGI:700010]
ENSMUSG00000015850	Adamtsl4	8.1	29.7	0.6	#N/A	#N/A	8.1	29.7	0.7	0.0835652	0.728333	3	95676201	95687917	4198	55.49	-1	protein_coding	ADAMTS-like protein 4 [Source:UniProtKB/Swiss-Prot;Acc:Q80T21]
ENSMUSG00000016024	Lbp	4.7	14.3	0.6	0.104554	0.993235	4.7	14.3	0.65	0.108285	0.926471	2	158306493	158332852	4831	47.77	1	protein_coding	Lipopolysaccharide-binding protein [Source:UniProtKB/Swiss-Prot;Acc:Q61805]
ENSMUSG00000020205	Phlda1	591.2	941.1	0.6	0.0121067	0.302893	591.2	941.1	0.48	0.0379304	0.499551	10	111506286	111508645	2205	58.05	1	protein_coding	Pleckstrin homology-like domain family A member 1 [Source:UniProtKB/Swiss-Prot;Acc:Q62392]
ENSMUSG00000020834	Dhrs13	11.9	26.9	0.6	0.110028	0.85347	11.9	26.9	0.92	0.0142376	0.375556	11	78032280	78037866	1967	50.74	1	protein_coding	Dehydrogenase/reductase SDR family member 13 [Source:UniProtKB/Swiss-Prot;Acc:Q5SS80]
ENSMUSG00000020840	Blmh	89.5	143.9	0.6	0.00990714	0.275153	89.5	143.9	0.63	0.0143358	0.342423	11	76924809	76987379	5891	43.33	1	protein_coding	Bleomycin hydrolase [Source:UniProtKB/Swiss-Prot;Acc:Q8R016]
ENSMUSG00000020859	Spag9	144.9	226.2	0.6	0.00185904	0.106875	144.9	226.2	0.58	0.00805497	0.253362	11	93996091	94126085	11209	39.87	1	protein_coding	sperm associated antigen 9 [Source:MGI Symbol;Acc:MGI:1918084]
ENSMUSG00000021135	Slc10a1	11.3	36	0.6	0.10123	0.831195	11.3	36	0.63	0.11784	0.775496	12	80953183	80968705	2199	44.95	-1	protein_coding	solute carrier family 10 (sodium/bile acid cotransporter family), member 1 [Source:MGI Symbol;Acc:MGI:97379]
ENSMUSG00000021364	Elovl2	4.7	12.4	0.6	0.107587	1	4.7	12.4	0.62	0.12638	1	13	41182381	41220405	3966	44.99	-1	protein_coding	Elongation of very long chain fatty acids protein 2 [Source:UniProtKB/Swiss-Prot;Acc:Q9JLJ4]
ENSMUSG00000022550	Adck5	39.9	67.1	0.6	0.0385552	0.59343	39.9	67.1	0.64	0.0400117	0.540984	15	76576358	76595816	3633	50.42	1	protein_coding	aarF domain containing kinase 5 [Source:HGNC Symbol;Acc:HGNC:21738]
ENSMUSG00000022696	Sidt1	138.3	226.4	0.6	0.0356467	0.493148	138.3	226.4	0.59	0.0493536	0.576015	16	44240180	44333196	5623	43.51	-1	protein_coding	SID1 transmembrane family member 1 [Source:UniProtKB/Swiss-Prot;Acc:Q6AXF6]
ENSMUSG00000024847	Aip	38.5	66.5	0.6	0.0527661	0.590171	38.5	66.5	0.68	0.0380361	0.543157	19	4114446	4125858	1937	49.41	-1	protein_coding	AH receptor-interacting protein [Source:UniProtKB/Swiss-Prot;Acc:O08915]
ENSMUSG00000025277	Abhd6	28.2	50.9	0.6	0.0855605	0.690647	28.2	50.9	0.66	0.0753985	0.658279	14	8002902	8056763	2365	45.15	1	protein_coding	abhydrolase domain containing 6 [Source:MGI Symbol;Acc:MGI:1913332]
ENSMUSG00000026170	Cyp27a1	26.2	47.5	0.6	0.0860024	0.790234	26.2	47.5	0.61	0.10535	0.7699	1	74713574	74737892	2173	45.63	1	protein_coding	Sterol 26-hydroxylase, mitochondrial [Source:UniProtKB/Swiss-Prot;Acc:Q9DBG1]
ENSMUSG00000026200	Glb1l	6.2	16.3	0.6	0.111452	0.993235	6.2	16.3	0.71	0.0839171	0.879133	1	75198236	75210813	5905	46.19	-1	protein_coding	Beta-galactosidase-1-like protein [Source:UniProtKB/Swiss-Prot;Acc:Q8VC60]
ENSMUSG00000026365	Cfh	9.9	18.8	0.6	0.0965394	0.841154	9.9	18.8	0.65	0.0926426	0.893233	1	140084708	140183764	8383	36.24	-1	protein_coding	Complement factor H [Source:UniProtKB/Swiss-Prot;Acc:P06909]
ENSMUSG00000027189	Trim44	141.4	232.2	0.6	0.0243341	0.418328	141.4	232.2	0.6	0.0391045	0.506876	2	102300119	102407828	5645	39.62	-1	protein_coding	tripartite motif-containing 44 [Source:MGI Symbol;Acc:MGI:1931835]
ENSMUSG00000029484	Anxa3	6.8	25.5	0.6	0.0940222	0.813369	6.8	25.5	0.66	0.0926597	0.747105	5	96793339	96845966	3643	43.4	1	protein_coding	Annexin A3 [Source:UniProtKB/Swiss-Prot;Acc:O35639]
ENSMUSG00000030921	Trim30a	19.8	41	0.6	0.111179	0.837963	19.8	41	0.75	0.0575919	0.642303	7	104409025	104465193	4111	41.04	-1	protein_coding	Mus musculus tripartite motif-containing 30A (Trim30a), transcript variant 2, mRNA. [Source:RefSeq mRNA;Acc:NM_001357467]
ENSMUSG00000031379	Pir	19.5	35.6	0.6	0.0878905	0.758421	19.5	35.6	0.57	0.135274	0.777572	X	164269371	164373011	5553	40.39	1	protein_coding	Pirin [Source:UniProtKB/Swiss-Prot;Acc:Q9D711]
ENSMUSG00000031596	Slc7a2	15.7	33.6	0.6	0.1138	0.859896	15.7	33.6	0.59	0.14799	0.833938	8	40862396	40922308	9135	42.37	1	protein_coding	solute carrier family 7 (cationic amino acid transporter, y+ system), member 2 [Source:MGI Symbol;Acc:MGI:99828]
ENSMUSG00000031996	Aplp2	380.8	598.3	0.6	0.0048433	0.187817	380.8	598.3	0.51	0.0160429	0.350903	9	31149557	31211815	5875	43.13	-1	protein_coding	Amyloid-like protein 2 [Source:UniProtKB/Swiss-Prot;Acc:Q06335]
ENSMUSG00000038888	Ctu1	26.1	47.3	0.6	0.0808145	0.775252	26.1	47.3	0.79	0.016909	0.422647	7	43672016	43678298	2475	53.35	1	protein_coding	Cytoplasmic tRNA 2-thiolation protein 1 [Source:UniProtKB/Swiss-Prot;Acc:Q99J10]
ENSMUSG00000039239	Tgfb2	2.8	10.8	0.6	0.0893834	0.909162	2.8	10.8	0.63	0.104358	0.899619	1	186622792	186705989	5791	45.37	-1	protein_coding	Transforming growth factor beta-2 Latency-associated peptide [Source:UniProtKB/Swiss-Prot;Acc:P27090]
ENSMUSG00000040152	Thbs1	522.9	866.5	0.6	0.0388319	0.509963	522.9	866.5	0.56	0.0663094	0.634166	2	118111876	118127133	6073	47.01	1	protein_coding	thrombospondin 1 [Source:MGI Symbol;Acc:MGI:98737]
ENSMUSG00000040843	Tiprl	159.5	260.6	0.6	0.0261303	0.438501	159.5	260.6	0.58	0.0383074	0.501396	1	165212286	165236996	5473	40.31	-1	protein_coding	TIP41-like protein [Source:UniProtKB/Swiss-Prot;Acc:Q8BH58]
ENSMUSG00000053398	Phgdh	27	49.8	0.6	0.0871254	0.693746	27	49.8	0.71	0.0552244	0.606247	3	98313170	98339990	2486	49.62	-1	protein_coding	D-3-phosphoglycerate dehydrogenase [Source:UniProtKB/Swiss-Prot;Acc:Q61753]
ENSMUSG00000057706	Mex3b	17.4	37.1	0.6	0.109862	0.80353	17.4	37.1	0.66	0.0998696	0.747199	7	82867333	82871515	3355	54.05	1	protein_coding	mex-3 RNA binding family member B [Source:HGNC Symbol;Acc:HGNC:25297]
ENSMUSG00000064065	Ipcef1	0.5	4.2	0.6	0.0625644	1	0.5	4.2	0.66	0.0638282	1	10	6885796	7052478	9003	40.93	-1	protein_coding	Mus musculus interaction protein for cytohesin exchange factors 1 (Ipcef1), transcript variant 5, mRNA. [Source:RefSeq mRNA;Acc:NM_001347225]
ENSMUSG00000064090	Vrk2	13.6	25.8	0.6	0.10233	0.82254	13.6	25.8	0.6	0.118755	0.765854	11	26471322	26593999	6591	39.85	-1	protein_coding	vaccinia related kinase 2 [Source:MGI Symbol;Acc:MGI:1917172]
ENSMUSG00000064735	Gm23057	12.6	23.7	0.6	0.0899362	0.803263	12.6	23.7	0.66	0.0812468	0.689762	9	72633447	72633553	107	42.99	1	snRNA	predicted gene, 23057 [Source:MGI Symbol;Acc:MGI:5452834]
ENSMUSG00000065913	Gm24448	4.3	10.3	0.6	0.115849	0.936624	4.3	10.3	0.64	0.118118	0.936561	4	63567662	63567768	107	45.79	-1	snRNA	predicted gene, 24448 [Source:MGI Symbol;Acc:MGI:5454225]
ENSMUSG00000066191	Anks6	11.3	29.3	0.6	0.110044	0.841608	11.3	29.3	0.62	0.129952	0.808197	4	47015669	47057427	5358	51.88	-1	protein_coding	Ankyrin repeat and SAM domain-containing protein 6 [Source:UniProtKB/Swiss-Prot;Acc:Q6GQX6]
ENSMUSG00000070960	Gm19680	3.8	10.8	0.6	0.112271	1	3.8	10.8	0.67	0.0974139	0.895204	1	31615149	31616661	1513	52.21	1	processed_pseudogene	predicted gene, 19680 [Source:MGI Symbol;Acc:MGI:5011865]
ENSMUSG00000071516	Hist1h2ai	4.5	9.5	0.6	0.112354	1	4.5	9.5	0.57	0.162102	0.961813	13	21716422	21716814	393	69.97	1	protein_coding	Histone H2A type 1-B [Source:UniProtKB/Swiss-Prot;Acc:C0HKE1]
ENSMUSG00000072884	Gm10433	7.7	20.6	0.6	0.10875	0.993235	7.7	20.6	0.95	0.0166757	0.556554	12	100187968	100193540	2016	44	1	processed_transcript
ENSMUSG00000073988	Ttpa	9.9	20.8	0.6	0.111671	0.837963	9.9	20.8	0.64	0.111154	0.745783	4	20007938	20030785	3488	39.96	1	protein_coding	tocopherol (alpha) transfer protein [Source:MGI Symbol;Acc:MGI:1354168]
ENSMUSG00000077457	Snord65	3.5	9.2	0.6	0.111836	1	3.5	9.2	0.6	0.137307	0.953932	11	62604515	62604586	72	40.28	1	snoRNA	small nucleolar RNA, C/D box 65 [Source:MGI Symbol;Acc:MGI:3819547]
ENSMUSG00000081732	Gm15495	4.9	10.1	0.6	0.112854	1	4.9	10.1	0.58	0.151895	0.97036	7	25442152	25443463	1312	44.44	-1	processed_pseudogene	predicted gene 15495 [Source:MGI Symbol;Acc:MGI:3782941]
ENSMUSG00000082389	Mkrn1-ps1	2.3	6.7	0.6	0.106297	1	2.3	6.7	0.61	0.127178	1	5	88838010	88839399	1390	50.72	-1	processed_pseudogene	makorin, ring finger protein 1, pseudogene 1 [Source:MGI Symbol;Acc:MGI:2663191]
ENSMUSG00000084454	Gm24592	14	26.4	0.6	0.0839485	0.795202	14	26.4	0.67	0.0698335	0.655575	6	120381034	120381139	106	41.51	-1	snRNA	predicted gene, 24592 [Source:MGI Symbol;Acc:MGI:5454369]
ENSMUSG00000086395	A630014C17Rik	1.9	7.9	0.6	0.091431	1	1.9	7.9	0.59	0.118944	1	11	52276055	52286179	2984	54.1	1	antisense	RIKEN cDNA A630014C17 gene [Source:MGI Symbol;Acc:MGI:3026989]
ENSMUSG00000093762	Gm25591	0	4.5	0.6	0.0385437	1	0	4.5	0.63	0.0479721	1	10	108428067	108428160	94	52.13	1	miRNA	predicted gene, 25591 [Source:MGI Symbol;Acc:MGI:5455368]
ENSMUSG00000102929	Gm37154	2.6	7.9	0.6	0.105842	1	2.6	7.9	0.6	0.13396	1	1	171354126	171355415	1290	43.57	1	TEC	predicted gene, 37154 [Source:MGI Symbol;Acc:MGI:5610382]
ENSMUSG00000105176	Gm43668	7.4	17.9	0.6	0.111147	0.862531	7.4	17.9	0.77	0.0573625	0.816423	3	34070659	34076000	5342	39.05	1	TEC	predicted gene 43668 [Source:MGI Symbol;Acc:MGI:5663805]
ENSMUSG00000105881	4932422M17Rik	6.2	13.3	0.6	0.112352	0.862585	6.2	13.3	0.65	0.110693	0.924605	5	123138931	123141569	2639	47.44	1	lincRNA	RIKEN cDNA 4932422M17 gene [Source:MGI Symbol;Acc:MGI:1921616]
ENSMUSG00000106208	Gm4734	17	30.2	0.6	0.0819277	0.722044	17	30.2	0.58	0.119329	0.757473	9	109970433	109971209	777	47.62	1	processed_pseudogene	predicted gene 4734 [Source:MGI Symbol;Acc:MGI:3782914]
ENSMUSG00000106895	Gm4754	67	106.3	0.6	0.00777227	0.24377	67	106.3	0.6	0.0212522	0.422496	5	41342123	41342931	809	46.48	1	processed_pseudogene	predicted gene 4754 [Source:MGI Symbol;Acc:MGI:3645925]
ENSMUSG00000107096	Gm43597	5.1	14.2	0.6	0.109315	0.861745	5.1	14.2	0.64	0.118488	0.923854	5	150599932	150607003	4620	44.5	-1	lincRNA	predicted gene 43597 [Source:MGI Symbol;Acc:MGI:5663734]
ENSMUSG00000109325	Krt8-ps	128.6	226.3	0.6	0.0664812	0.642003	128.6	226.3	0.8	0.00720943	0.237477	7	23357125	23358069	945	55.87	1	processed_pseudogene	keratin 8, pseudogene [Source:MGI Symbol;Acc:MGI:3779503]
ENSMUSG00000110088	Gm45343	29.7	65.9	0.6	0.115701	0.746684	29.7	65.9	0.61	0.13599	0.778986	8	25687369	25688196	828	39.25	1	TEC	predicted gene 45343 [Source:MGI Symbol;Acc:MGI:5791179]
ENSMUSG00000113816	Gm47003	1.5	7.3	0.6	0.0834469	1	1.5	7.3	0.71	0.0668029	1	13	64291077	64298039	1481	44.95	1	antisense	predicted gene, 47003 [Source:MGI Symbol;Acc:MGI:6095679]
ENSMUSG00000116226	AC105358.1	4.7	13.2	0.6	0.106008	0.837963	4.7	13.2	0.71	0.0819062	0.859476	15	82185516	82187625	2110	50.24	1	TEC
ENSMUSG00000001525	Tubb5	695.7	1092.1	0.59	0.0107713	0.285895	695.7	1092.1	0.5	0.0346957	0.48511	17	35833921	35838306	3327	51.62	-1	protein_coding	tubulin, beta 5 class I [Source:MGI Symbol;Acc:MGI:107812]
ENSMUSG00000002769	Gnmt	10.6	28.6	0.59	0.116844	0.856982	10.6	28.6	0.8	0.0516867	0.602225	17	46725664	46729168	1206	53.24	-1	protein_coding	glycine N-methyltransferase [Source:MGI Symbol;Acc:MGI:1202304]
ENSMUSG00000003444	Med29	26.7	45.6	0.59	0.0522787	0.690647	26.7	45.6	0.64	0.0537356	0.601081	7	28386146	28392708	1281	51.27	-1	protein_coding	Mediator of RNA polymerase II transcription subunit 29 [Source:UniProtKB/Swiss-Prot;Acc:Q9DB91]
ENSMUSG00000006519	Cyba	69.1	122.9	0.59	0.0802179	0.684615	69.1	122.9	0.7	0.0455318	0.54344	8	122424776	122432930	1039	53.18	-1	protein_coding	Cytochrome b-245 light chain [Source:UniProtKB/Swiss-Prot;Acc:Q61462]
ENSMUSG00000020023	Tmcc3	66.4	106.8	0.59	0.0184583	0.376115	66.4	106.8	0.58	0.0383074	0.529238	10	94311949	94590956	7153	45.5	1	protein_coding	Transmembrane and coiled-coil domain protein 3 [Source:UniProtKB/Swiss-Prot;Acc:Q8R310]
ENSMUSG00000020275	Rel	21.7	37.4	0.59	0.0751388	0.783858	21.7	37.4	0.48	0.172319	0.825125	11	23736847	23770970	7466	38.02	-1	protein_coding	reticuloendotheliosis oncogene [Source:MGI Symbol;Acc:MGI:97897]
ENSMUSG00000023078	Cxcl13	3.4	21	0.59	#N/A	#N/A	3.4	21	0.64	0.0825424	0.860154	5	95956951	95961068	1150	39.41	1	protein_coding	C-X-C motif chemokine 13 [Source:UniProtKB/Swiss-Prot;Acc:O55038]
ENSMUSG00000023919	Cenpq	72	115.1	0.59	0.0244867	0.418328	72	115.1	0.54	0.0557029	0.60986	17	40923051	40935047	2604	38.48	-1	protein_coding	centromere protein Q [Source:HGNC Symbol;Acc:HGNC:21347]
ENSMUSG00000026104	Stat1	129.1	214.8	0.59	0.0497132	0.577081	129.1	214.8	0.44	0.153579	0.797844	1	52119440	52161865	7105	45.89	1	protein_coding	signal transducer and activator of transcription 1 [Source:MGI Symbol;Acc:MGI:103063]
ENSMUSG00000026955	Sapcd2	12.4	22.9	0.59	0.0988298	0.757041	12.4	22.9	0.53	0.17621	0.838692	2	25372321	25378213	3499	55.51	1	protein_coding	Suppressor APC domain-containing protein 2 [Source:UniProtKB/Swiss-Prot;Acc:Q9D818]
ENSMUSG00000027884	Clcc1	56.4	92.6	0.59	0.0298137	0.459042	56.4	92.6	0.71	0.00774241	0.243503	3	108653913	108678840	4559	42.94	1	protein_coding	Mus musculus chloride channel CLIC-like 1 (Clcc1), transcript variant 4, mRNA. [Source:RefSeq mRNA;Acc:NM_001355632]
ENSMUSG00000028577	Plaa	208.6	331.2	0.59	0.0158017	0.358975	208.6	331.2	0.51	0.0348699	0.498731	4	94567514	94603244	6441	38.84	-1	protein_coding	Phospholipase A-2-activating protein [Source:UniProtKB/Swiss-Prot;Acc:P27612]
ENSMUSG00000028691	Prdx1	2072.9	3208.6	0.59	0.00223487	0.117879	2072.9	3208.6	0.53	0.00685707	0.225572	4	116685544	116700822	3043	41.72	1	protein_coding	Peroxiredoxin-1 [Source:UniProtKB/Swiss-Prot;Acc:P35700]
ENSMUSG00000029830	Svopl	1.7	7.7	0.59	0.0902888	1	1.7	7.7	0.7	0.0707574	1	6	37983739	38046996	5814	43.02	-1	protein_coding	Putative transporter SVOPL [Source:UniProtKB/Swiss-Prot;Acc:Q6PDF3]
ENSMUSG00000030867	Plk1	38.6	65.6	0.59	0.0641016	0.633296	38.6	65.6	0.54	0.11378	0.741104	7	122159439	122169873	2199	51.3	1	protein_coding	polo like kinase 1 [Source:MGI Symbol;Acc:MGI:97621]
ENSMUSG00000033192	Lpcat2	4.8	13.2	0.59	0.112222	0.847438	4.8	13.2	0.59	0.140558	0.956972	8	92855339	92919279	3388	41.71	1	protein_coding	Lysophosphatidylcholine acyltransferase 2 [Source:UniProtKB/Swiss-Prot;Acc:Q8BYI6]
ENSMUSG00000033805	Ephx4	1.5	9.8	0.59	0.0709411	0.868769	1.5	9.8	0.67	0.064881	0.998118	5	107402736	107430035	1646	42.58	1	protein_coding	Epoxide hydrolase 4 [Source:UniProtKB/Swiss-Prot;Acc:Q6IE26]
ENSMUSG00000035678	Tnfsf9	13	27.8	0.59	0.118192	0.85347	13	27.8	0.58	0.143466	0.84324	17	57105385	57107757	1230	52.47	1	protein_coding	tumor necrosis factor (ligand) superfamily, member 9 [Source:MGI Symbol;Acc:MGI:1101058]
ENSMUSG00000035764	Fbxo45	52.5	86.2	0.59	0.0507263	0.578459	52.5	86.2	0.47	0.117229	0.747105	16	32230112	32247158	4179	42.95	-1	protein_coding	F-box/SPRY domain-containing protein 1 [Source:UniProtKB/Swiss-Prot;Acc:Q8K3B1]
ENSMUSG00000039616	Mocos	10.1	21.7	0.59	0.115122	0.861745	10.1	21.7	0.63	0.1219	0.800269	18	24653691	24701556	2884	46.24	1	protein_coding	Molybdenum cofactor sulfurase [Source:UniProtKB/Swiss-Prot;Acc:Q14CH1]
ENSMUSG00000039715	Wdr34	11.4	25.9	0.59	0.122066	0.859453	11.4	25.9	0.61	0.133221	0.788054	2	30031546	30048881	2359	50.23	-1	protein_coding	WD repeat domain 34 [Source:MGI Symbol;Acc:MGI:1919070]
ENSMUSG00000041608	Entpd3	9.2	23.2	0.59	0.114322	0.790234	9.2	23.2	0.59	0.14949	0.808197	9	120539818	120568327	3755	47.99	1	protein_coding	ectonucleoside triphosphate diphosphohydrolase 3 [Source:RefSeq peptide;Acc:NP_848791]
ENSMUSG00000043391	2510009E07Rik	93.7	154.2	0.59	0.0412052	0.526291	93.7	154.2	0.51	0.0740096	0.661884	16	21649045	21694665	5164	43.66	-1	protein_coding	UPF0524 [Source:UniProtKB/Swiss-Prot;Acc:Q6GQU0]
ENSMUSG00000045411	2410002F23Rik	24.9	45.1	0.59	0.0842378	0.690647	24.9	45.1	0.63	0.0881913	0.756091	7	44246722	44252319	5233	50.66	1	protein_coding	RIKEN cDNA 2410002F23 gene [Source:MGI Symbol;Acc:MGI:1914226]
ENSMUSG00000046169	Adamts6	0.8	9.1	0.59	0.0581205	1	0.8	9.1	0.6	0.078562	1	13	104287835	104496695	7798	36.56	1	protein_coding	a disintegrin-like and metallopeptidase (reprolysin type) with thrombospondin type 1 motif, 6 [Source:MGI Symbol;Acc:MGI:1347348]
ENSMUSG00000047014	Catsperb	3.3	9.5	0.59	0.112777	1	3.3	9.5	0.63	0.119314	1	12	101404653	101626009	5524	38.87	1	protein_coding	Cation channel sperm-associated protein subunit beta [Source:UniProtKB/Swiss-Prot;Acc:A2RTF1]
ENSMUSG00000048988	Elfn1	0	3.3	0.59	0.0411058	1	0	3.3	0.54	0.0739546	1	5	139907943	139974722	4172	51.93	1	protein_coding	Protein ELFN1 [Source:UniProtKB/Swiss-Prot;Acc:Q8C8T7]
ENSMUSG00000062190	Lancl2	42.5	73.1	0.59	0.062062	0.630723	42.5	73.1	0.63	0.063476	0.626737	6	57702540	57739439	3020	39.01	1	protein_coding	LanC-like protein 2 [Source:UniProtKB/Swiss-Prot;Acc:Q9JJK2]
ENSMUSG00000062727	Hist1h2bk	4.4	13.2	0.59	0.10757	1	4.4	13.2	0.61	0.127535	1	13	22035870	22036345	476	58.82	1	protein_coding	Histone H2B type 1-K [Source:UniProtKB/Swiss-Prot;Acc:Q8CGP1]
ENSMUSG00000064280	Ccdc146	1	12.6	0.59	0.0564594	0.992216	1	12.6	0.84	0.0246416	0.650751	5	21292961	21424677	4371	41.69	-1	protein_coding	coiled-coil domain containing 146 [Source:MGI Symbol;Acc:MGI:1922422]
ENSMUSG00000071637	Cebpd	37.5	65.4	0.59	0.0796112	0.679968	37.5	65.4	0.62	0.0846965	0.680169	16	15887286	15891031	3746	51.6	1	protein_coding	CCAAT/enhancer-binding protein delta [Source:UniProtKB/Swiss-Prot;Acc:Q00322]
ENSMUSG00000078570	1110065P20Rik	9.4	17.5	0.59	0.104253	0.993235	9.4	17.5	0.5	0.200328	0.986495	4	124849080	124851196	2069	61.64	-1	protein_coding	RIKEN cDNA 1110065P20 gene [Source:MGI Symbol;Acc:MGI:1916170]
ENSMUSG00000083670	Gm6829	2.2	9.6	0.59	0.0915752	0.912322	2.2	9.6	0.66	0.087053	1	X	9327749	9328108	360	46.39	-1	processed_pseudogene	predicted pseudogene 6829 [Source:MGI Symbol;Acc:MGI:3648590]
ENSMUSG00000083937	Cct3-ps1	2.2	6.1	0.59	0.111955	1	2.2	6.1	0.54	0.172969	1	4	52900599	52902683	1647	46.19	1	processed_pseudogene	chaperonin containing Tcp1, subunit 3 (gamma) pseudogene 1 [Source:MGI Symbol;Acc:MGI:109293]
ENSMUSG00000089662	Gm14057	3	10	0.59	0.108759	0.924746	3	10	0.7	0.0827434	0.869999	2	130803501	130803982	482	54.36	-1	transcribed_processed_pseudogene	predicted gene 14057 [Source:MGI Symbol;Acc:MGI:3705433]
ENSMUSG00000097282	5031415H12Rik	2.9	8.5	0.59	0.11315	0.944608	2.9	8.5	0.61	0.131025	0.945141	17	70745329	70755582	2481	46.56	-1	lincRNA	RIKEN cDNA 5031415H12 gene [Source:MGI Symbol;Acc:MGI:1923234]
ENSMUSG00000102162	Gm2367	6.7	13	0.59	0.110985	0.862531	6.7	13	0.54	0.17653	0.97865	1	192888571	192889042	472	47.03	1	processed_pseudogene	predicted gene 2367 [Source:MGI Symbol;Acc:MGI:3780535]
ENSMUSG00000102211	Gm37490	11.3	24.7	0.59	0.117471	0.847438	11.3	24.7	0.61	0.132753	0.775433	1	176889507	176890230	724	41.85	1	TEC	predicted gene, 37490 [Source:MGI Symbol;Acc:MGI:5610718]
ENSMUSG00000104358	Gm37127	1.4	4.9	0.59	0.0976085	1	1.4	4.9	0.56	0.136865	1	1	34823525	34826560	3036	45.52	1	TEC	predicted gene, 37127 [Source:MGI Symbol;Acc:MGI:5610355]
ENSMUSG00000106239	Gm9260	2.3	9	0.59	0.0957773	0.902648	2.3	9	0.61	0.113791	0.92421	12	115982263	115993370	1380	43.09	-1	processed_pseudogene	predicted gene 9260 [Source:MGI Symbol;Acc:MGI:3645725]
ENSMUSG00000106664	Gm17936	9.7	18.4	0.59	0.108213	0.993235	9.7	18.4	0.61	0.126885	0.945422	5	8912971	8913958	988	49.39	1	processed_pseudogene	predicted gene, 17936 [Source:MGI Symbol;Acc:MGI:5010121]
ENSMUSG00000107006	Gm43105	7.4	16.2	0.59	0.118365	0.85347	7.4	16.2	0.59	0.144985	0.949981	5	34306718	34307176	459	49.89	-1	processed_pseudogene	predicted gene 43105 [Source:MGI Symbol;Acc:MGI:5663242]
ENSMUSG00000108943	Gm44559	2.4	18.6	0.59	0.0676943	0.786647	2.4	18.6	0.73	0.0460515	0.767805	7	59262923	59263934	1012	30.34	-1	TEC	predicted gene 44559 [Source:MGI Symbol;Acc:MGI:5753135]
ENSMUSG00000109125	Gm45159	1.7	5.3	0.59	0.108673	1	1.7	5.3	0.57	0.147402	1	7	90887072	90940052	25241	36.59	1	lincRNA	predicted gene 45159 [Source:MGI Symbol;Acc:MGI:5753735]
ENSMUSG00000113067	Gm47166	0.5	4.3	0.59	0.0649834	1	0.5	4.3	0.59	0.0885849	1	12	102859741	102861449	1709	37.45	-1	TEC	predicted gene, 47166 [Source:MGI Symbol;Acc:MGI:6095944]
ENSMUSG00000115730	AC106830.2	26.4	45.8	0.59	0.0657736	0.735807	26.4	45.8	0.64	0.0606215	0.653342	15	44281980	44283775	943	42.04	1	processed_pseudogene
ENSMUSG00000002055	Spag5	25.5	47.1	0.58	0.104151	0.728619	25.5	47.1	0.53	0.167932	0.84324	11	78301529	78322457	5624	45.73	1	protein_coding	Sperm-associated antigen 5 [Source:UniProtKB/Swiss-Prot;Acc:Q7TME2]
ENSMUSG00000009378	Slc16a12	41.1	67.7	0.58	0.0519603	0.584166	41.1	67.7	0.55	0.076595	0.667391	19	34668403	34747289	4051	40.91	-1	protein_coding	solute carrier family 16 (monocarboxylic acid transporters), member 12 [Source:MGI Symbol;Acc:MGI:2147716]
ENSMUSG00000015748	Prpf3	57.5	91.4	0.58	0.0187373	0.377157	57.5	91.4	0.6	0.0288371	0.46543	3	95830124	95855885	5661	41.12	-1	protein_coding	U4/U6 small nuclear ribonucleoprotein Prp3 [Source:UniProtKB/Swiss-Prot;Acc:Q922U1]
ENSMUSG00000022420	Dnal4	29	51.2	0.58	0.0826679	0.686523	29	51.2	0.76	0.02791	0.461322	15	79761453	79777849	2391	51.91	-1	protein_coding	Dynein light chain 4, axonemal [Source:UniProtKB/Swiss-Prot;Acc:Q9DCM4]
ENSMUSG00000022857	Tmprss15	0.7	5.3	0.58	0.0742932	1	0.7	5.3	0.56	0.109483	1	16	78953008	79091097	4182	36.59	-1	protein_coding	transmembrane protease, serine 15 [Source:MGI Symbol;Acc:MGI:1197523]
ENSMUSG00000023015	Racgap1	97.6	158	0.58	0.0328691	0.47344	97.6	158	0.57	0.0538526	0.601081	15	99620496	99651656	7079	45.25	-1	protein_coding	Rac GTPase-activating protein 1 [Source:MGI Symbol;Acc:MGI:1349423]
ENSMUSG00000023104	Rfc2	140.6	222.1	0.58	0.0146655	0.34006	140.6	222.1	0.73	0.000530536	0.0495801	5	134581366	134601805	6303	49.77	1	protein_coding	replication factor C (activator 1) 2 [Source:MGI Symbol;Acc:MGI:1341868]
ENSMUSG00000023249	Parp3	11.2	23	0.58	0.119919	0.856982	11.2	23	0.63	0.114664	0.757473	9	106470322	106476949	3699	55.1	-1	protein_coding	poly(ADP-ribose) polymerase family member 3 [Source:HGNC Symbol;Acc:HGNC:273]
ENSMUSG00000024799	Tm7sf2	46.3	73.1	0.58	0.031254	0.468428	46.3	73.1	0.51	0.0811291	0.667391	19	6062821	6077197	5593	51.84	-1	protein_coding	transmembrane 7 superfamily member 2 [Source:MGI Symbol;Acc:MGI:1920416]
ENSMUSG00000024963	Dnajc4	34.9	63.6	0.58	0.100523	0.722044	34.9	63.6	0.74	0.0342083	0.522134	19	6987911	6992503	1074	50.05	-1	protein_coding	Mus musculus DnaJ heat shock protein family (Hsp40) member C4 (Dnajc4), transcript variant 1, mRNA. [Source:RefSeq mRNA;Acc:NM_001356999]
ENSMUSG00000025278	Flnb	79	122.8	0.58	0.00287217	0.141859	79	122.8	0.6	0.00773722	0.237477	14	7817957	7951588	9198	46.09	1	protein_coding	Filamin-B [Source:UniProtKB/Swiss-Prot;Acc:Q80X90]
ENSMUSG00000027570	Col9a3	25.8	44	0.58	0.0886015	0.698186	25.8	44	0.54	0.139216	0.838692	2	180597790	180622189	3853	51.73	1	protein_coding	collagen, type IX, alpha 3 [Source:MGI Symbol;Acc:MGI:894686]
ENSMUSG00000027712	Anxa5	135.9	212	0.58	0.00877798	0.258534	135.9	212	0.55	0.0253025	0.439192	3	36448923	36475894	1777	44.41	-1	protein_coding	Annexin A5 [Source:UniProtKB/Swiss-Prot;Acc:P48036]
ENSMUSG00000028212	Ccne2	41.2	70.7	0.58	0.0674285	0.650216	41.2	70.7	0.64	0.0482556	0.604263	4	11191351	11204779	3495	37.65	1	protein_coding	G1/S-specific cyclin-E2 [Source:UniProtKB/Swiss-Prot;Acc:Q9Z238]
ENSMUSG00000029034	Ints11	25.5	48.7	0.58	0.114434	0.860208	25.5	48.7	0.61	0.116524	0.76188	4	155869546	155889103	3067	45.69	1	protein_coding	Integrator complex subunit 11 [Source:UniProtKB/Swiss-Prot;Acc:Q9CWS4]
ENSMUSG00000030223	Ptpro	71.2	132.5	0.58	0.109977	0.739862	71.2	132.5	0.59	0.124533	0.757473	6	137252319	137463233	6723	42.93	1	protein_coding	Receptor-type tyrosine-protein phosphatase O [Source:UniProtKB/Swiss-Prot;Acc:E9Q612]
ENSMUSG00000031347	Cetn2	190.8	298.5	0.58	0.0125971	0.309836	190.8	298.5	0.58	0.0219019	0.407668	X	72913532	72918411	1646	39.49	-1	protein_coding	Centrin-2 [Source:UniProtKB/Swiss-Prot;Acc:Q9R1K9]
ENSMUSG00000031821	Gins2	25.5	48	0.58	0.111514	0.745488	25.5	48	0.6	0.114913	0.788054	8	120578633	120589304	4097	52.33	-1	protein_coding	DNA replication complex GINS protein PSF2 [Source:UniProtKB/Swiss-Prot;Acc:Q9D600]
ENSMUSG00000033763	Mtss1l	0.3	4.6	0.58	0.0557393	1	0.3	4.6	0.54	0.0891919	1	8	110721476	110741400	5311	54.56	1	protein_coding	MTSS1-like protein [Source:UniProtKB/Swiss-Prot;Acc:Q6P9S0]
ENSMUSG00000034723	Tmx4	51.5	91.6	0.58	0.0888105	0.698384	51.5	91.6	0.6	0.101006	0.716424	2	134594185	134644145	10907	38.73	-1	protein_coding	thioredoxin-related transmembrane protein 4 [Source:MGI Symbol;Acc:MGI:106558]
ENSMUSG00000037419	Endod1	49.6	78.4	0.58	0.02483	0.42211	49.6	78.4	0.48	0.0748493	0.658279	9	14353990	14381507	4645	46.28	-1	protein_coding	Endonuclease domain-containing 1 protein [Source:UniProtKB/Swiss-Prot;Acc:Q8C522]
ENSMUSG00000053113	Socs3	40.2	68.8	0.58	0.0761251	0.671728	40.2	68.8	0.7	0.0299884	0.471341	11	117966079	117970047	2891	61.02	-1	protein_coding	suppressor of cytokine signaling 3 [Source:MGI Symbol;Acc:MGI:1201791]
ENSMUSG00000059669	Taf1b	29.7	52.7	0.58	0.0956521	0.778219	29.7	52.7	0.61	0.101476	0.725892	12	24498359	24558539	2624	43.03	1	protein_coding	TATA-box binding protein associated factor, RNA polymerase I, B [Source:MGI Symbol;Acc:MGI:109577]
ENSMUSG00000063684	Gm13910	64.1	109.3	0.58	0.0739969	0.664332	64.1	109.3	0.73	0.013283	0.327753	2	108948806	108950233	1428	46.43	1	processed_pseudogene	predicted gene 13910 [Source:MGI Symbol;Acc:MGI:3651143]
ENSMUSG00000065952	C330021F23Rik	3.1	11.6	0.58	0.101769	1	3.1	11.6	0.6	0.118986	1	8	3567990	3584939	2773	45.53	1	protein_coding	RIKEN cDNA C330021F23 gene [Source:MGI Symbol;Acc:MGI:3612471]
ENSMUSG00000066245	Gm10156	3.7	8.5	0.58	0.126932	0.944608	3.7	8.5	0.57	0.164893	0.971591	7	107863039	107863500	462	51.95	1	processed_pseudogene	predicted gene 10156 [Source:MGI Symbol;Acc:MGI:3642344]
ENSMUSG00000071847	Apcdd1	0.5	6.2	0.58	0.0601177	1	0.5	6.2	0.66	0.0656316	1	18	62922327	62953195	2799	47.12	1	protein_coding	Protein APCDD1 [Source:UniProtKB/Swiss-Prot;Acc:Q3U128]
ENSMUSG00000078994	Zfp429	20.3	39.3	0.58	0.11623	0.813999	20.3	39.3	0.68	0.0754147	0.672526	13	67387905	67399819	2324	40.73	-1	protein_coding	zinc finger protein 429 [Source:MGI Symbol;Acc:MGI:1920057]
ENSMUSG00000079017	Ifi27l2a	15.2	38.9	0.58	0.122099	0.758404	15.2	38.9	0.47	0.250782	0.915513	12	103442167	103443680	463	52.18	-1	protein_coding	Interferon alpha-inducible protein 27-like protein 2A [Source:UniProtKB/Swiss-Prot;Acc:Q8R412]
ENSMUSG00000080772	Gm12543	2.8	7.9	0.58	0.120363	1	2.8	7.9	0.58	0.145842	1	4	59833677	59834219	543	41.8	1	transcribed_processed_pseudogene	predicted gene 12543 [Source:MGI Symbol;Acc:MGI:3649591]
ENSMUSG00000083477	Gm5555	11.9	25.4	0.58	0.12717	0.805832	11.9	25.4	0.66	0.102824	0.740509	5	49552158	49553268	1111	51.85	1	processed_pseudogene	predicted pseudogene 5555 [Source:MGI Symbol;Acc:MGI:3648970]
ENSMUSG00000087381	Gm16008	0.3	4.3	0.58	0.0585957	1	0.3	4.3	0.59	0.0731396	1	4	156022008	156031643	1324	49.61	-1	antisense	predicted gene 16008 [Source:MGI Symbol;Acc:MGI:3802048]
ENSMUSG00000097194	9330175E14Rik	5.7	17.3	0.58	0.113218	0.993235	5.7	17.3	0.63	0.116276	0.932079	8	94422898	94435103	5938	48.27	-1	lincRNA	RIKEN cDNA 9330175E14 gene [Source:MGI Symbol;Acc:MGI:2443913]
ENSMUSG00000097814	Panct2	7	58.4	0.58	#N/A	#N/A	7	58.4	1.1	0.00637459	0.224801	1	96871126	96907796	4120	39.61	1	antisense	pluripotency-associated noncoding transcript 2 [Source:MGI Symbol;Acc:MGI:3643517]
ENSMUSG00000103553	Gm38218	3.6	10.5	0.58	0.119965	0.944608	3.6	10.5	0.59	0.143235	0.961978	1	66821226	66825914	4689	40.03	-1	TEC	predicted gene, 38218 [Source:MGI Symbol;Acc:MGI:5611446]
ENSMUSG00000110069	Gm45422	2.6	6.5	0.58	0.122829	1	2.6	6.5	0.53	0.190562	1	8	102534645	102534890	246	44.31	1	processed_pseudogene	predicted gene 45422 [Source:MGI Symbol;Acc:MGI:5791258]
ENSMUSG00000113119	Gm48883	6.6	19	0.58	0.115967	0.85347	6.6	19	0.61	0.127714	0.935173	13	31832905	31834736	1832	44.92	-1	TEC	predicted gene, 48883 [Source:MGI Symbol;Acc:MGI:6098639]
ENSMUSG00000115315	CT009600.1	5.5	11.6	0.58	0.123671	0.944608	5.5	11.6	0.55	0.178523	0.971591	14	96700273	96700609	337	48.66	-1	processed_pseudogene
ENSMUSG00000115801	AC160336.1	6.7	16.7	0.58	0.127281	0.863919	6.7	16.7	0.63	0.123361	0.942751	14	44544055	44637201	93147	40.82	-1	lincRNA
ENSMUSG00000001062	Vps9d1	30.2	54.4	0.57	0.104779	0.729031	30.2	54.4	0.74	0.0282982	0.46543	8	123242356	123254348	5153	54.85	-1	protein_coding	VPS9 domain containing 1 [Source:MGI Symbol;Acc:MGI:1914143]
ENSMUSG00000002105	Slc39a13	30.4	62.1	0.57	0.12733	0.77342	30.4	62.1	0.65	0.0989648	0.722139	2	91061791	91070417	4869	53.74	-1	protein_coding	solute carrier family 39 (metal ion transporter), member 13 [Source:MGI Symbol;Acc:MGI:1915677]
ENSMUSG00000019256	Ahr	51.6	83.4	0.57	0.0525937	0.589319	51.6	83.4	0.49	0.111536	0.746496	12	35497974	35535038	6163	41.99	-1	protein_coding	aryl hydrocarbon receptor isoform 2 [Source:RefSeq peptide;Acc:NP_001300956]
ENSMUSG00000020037	Rfx4	0.7	7.5	0.57	0.0672263	1	0.7	7.5	0.61	0.0845008	1	10	84756062	84906538	4724	46.3	1	protein_coding	Transcription factor RFX4 [Source:UniProtKB/Swiss-Prot;Acc:Q7TNK1]
ENSMUSG00000021959	Lats2	1.8	18.6	0.57	0.0632879	0.733564	1.8	18.6	0.71	0.0455125	0.771614	14	57689662	57758388	6971	47.2	-1	protein_coding	Serine/threonine-protein kinase LATS2 [Source:UniProtKB/Swiss-Prot;Acc:Q7TSJ6]
ENSMUSG00000023460	Rab12	25.5	49.2	0.57	0.123485	0.829338	25.5	49.2	0.64	0.0953661	0.724316	17	66494512	66519717	3021	46.7	-1	protein_coding	Ras-related protein Rab-12 [Source:UniProtKB/Swiss-Prot;Acc:P35283]
ENSMUSG00000024030	Abcg1	16.1	27.5	0.57	0.0911783	0.81895	16.1	27.5	0.53	0.154405	0.812246	17	31057698	31115777	4066	50.69	1	protein_coding	ATP binding cassette subfamily G member 1 [Source:MGI Symbol;Acc:MGI:107704]
ENSMUSG00000024952	Rps6ka4	19.6	35.4	0.57	0.114337	0.860208	19.6	35.4	0.5	0.181697	0.87128	19	6829085	6840601	3119	54.71	-1	protein_coding	ribosomal protein S6 kinase, polypeptide 4 [Source:MGI Symbol;Acc:MGI:1930076]
ENSMUSG00000026229	Psmd1	240.3	362.8	0.57	0.0002082	0.0233719	240.3	362.8	0.56	0.00208109	0.11874	1	86064387	86139151	7265	40.8	1	protein_coding	proteasome (prosome, macropain) 26S subunit, non-ATPase, 1 [Source:MGI Symbol;Acc:MGI:1917497]
ENSMUSG00000027326	Knl1	78.7	137.7	0.57	0.0954	0.708384	78.7	137.7	0.61	0.0926743	0.693684	2	119047119	119105501	8542	38.99	1	protein_coding	Kinetochore scaffold 1 [Source:UniProtKB/Swiss-Prot;Acc:Q66JQ7]
ENSMUSG00000027931	Npr1	5.8	11.8	0.57	0.132825	0.95834	5.8	11.8	0.54	0.183622	0.985989	3	90450591	90465866	4783	51.46	-1	protein_coding	natriuretic peptide receptor 1 [Source:MGI Symbol;Acc:MGI:97371]
ENSMUSG00000029699	Ssc4d	4.1	12.2	0.57	0.122101	0.944608	4.1	12.2	0.65	0.108477	0.926606	5	135960211	135974531	2976	50.76	-1	protein_coding	scavenger receptor cysteine rich family, 4 domains [Source:MGI Symbol;Acc:MGI:1924709]
ENSMUSG00000029910	Mad2l1	133.2	209.1	0.57	0.0262159	0.437529	133.2	209.1	0.52	0.0494245	0.558837	6	66535390	66547220	8390	40.33	1	protein_coding	Mitotic spindle assembly checkpoint protein MAD2A [Source:UniProtKB/Swiss-Prot;Acc:Q9Z1B5]
ENSMUSG00000030750	Nsmce1	109.9	172.6	0.57	0.0308858	0.469074	109.9	172.6	0.55	0.0520028	0.592144	7	125467640	125491596	1329	48.85	-1	protein_coding	NSE1 homolog, SMC5-SMC6 complex component [Source:HGNC Symbol;Acc:HGNC:29897]
ENSMUSG00000031497	Tnfsf13b	16.3	32.7	0.57	0.126976	0.765941	16.3	32.7	0.73	0.0509919	0.620363	8	10006467	10039072	6868	41.61	1	protein_coding	tumor necrosis factor (ligand) superfamily, member 13b [Source:MGI Symbol;Acc:MGI:1344376]
ENSMUSG00000033589	Reep4	48.2	76.1	0.57	0.0191653	0.378606	48.2	76.1	0.62	0.0222293	0.413932	14	70545251	70548933	2377	57.29	1	protein_coding	Receptor expression-enhancing protein 4 [Source:UniProtKB/Swiss-Prot;Acc:Q8K072]
ENSMUSG00000036533	Cdc42ep3	30	55.2	0.57	0.11951	0.7548	30	55.2	0.48	0.218257	0.859476	17	79334025	79355091	1967	46.65	-1	protein_coding	Cdc42 effector protein 3 [Source:UniProtKB/Swiss-Prot;Acc:Q9CQC5]
ENSMUSG00000036898	Zfp157	44.9	76.9	0.57	0.0909555	0.700862	44.9	76.9	0.59	0.102884	0.722139	5	138441468	138460694	8782	40.51	1	protein_coding	zinc finger protein 157 [Source:MGI Symbol;Acc:MGI:1919404]
ENSMUSG00000037887	Dusp8	35.2	57.4	0.57	0.0625395	0.631203	35.2	57.4	0.6	0.0676253	0.642264	7	142079490	142095843	4870	55.13	-1	protein_coding	Dual specificity protein phosphatase 8 [Source:UniProtKB/Swiss-Prot;Acc:O09112]
ENSMUSG00000039179	Tekt5	2.8	9.3	0.57	0.116898	0.938743	2.8	9.3	0.6	0.128031	0.945769	16	10357948	10395490	1807	48.87	-1	protein_coding	Tektin-5 [Source:UniProtKB/Swiss-Prot;Acc:G5E8A8]
ENSMUSG00000039982	Dtx4	71.6	117.4	0.57	0.0557311	0.5987	71.6	117.4	0.48	0.126915	0.775496	19	12466341	12501996	5765	47.25	-1	protein_coding	E3 ubiquitin-protein ligase DTX4 [Source:UniProtKB/Swiss-Prot;Acc:Q6PDK8]
ENSMUSG00000043065	Spice1	68.7	107.4	0.57	0.0191464	0.382168	68.7	107.4	0.61	0.0201174	0.392362	16	44347121	44388497	5416	41.43	1	protein_coding	Spindle and centriole-associated protein 1 [Source:UniProtKB/Swiss-Prot;Acc:Q8C804]
ENSMUSG00000044876	Zfp444	33.5	55.9	0.57	0.0728738	0.660746	33.5	55.9	0.6	0.079748	0.667391	7	6172226	6193811	5959	48.46	1	protein_coding	zinc finger protein 444 [Source:MGI Symbol;Acc:MGI:1923365]
ENSMUSG00000048174	Tmem81	3.8	9.1	0.57	0.133898	0.946541	3.8	9.1	0.54	0.185867	0.982473	1	132506230	132508639	2018	48.8	1	protein_coding	Transmembrane protein 81 [Source:UniProtKB/Swiss-Prot;Acc:Q9D5K1]
ENSMUSG00000051378	Kif18b	2.7	9.5	0.57	0.113084	0.933643	2.7	9.5	0.56	0.148737	0.953028	11	102905529	102925124	3572	47.96	-1	protein_coding	Kinesin-like protein KIF18B [Source:UniProtKB/Swiss-Prot;Acc:Q6PFD6]
ENSMUSG00000054693	Adam10	276.7	440.7	0.57	0.0329272	0.47344	276.7	440.7	0.43	0.0698277	0.65372	9	70678997	70780229	4913	38.34	1	protein_coding	Disintegrin and metalloproteinase domain-containing protein 10 [Source:UniProtKB/Swiss-Prot;Acc:O35598]
ENSMUSG00000058672	Tubb2a	53.2	83	0.57	0.0216712	0.404918	53.2	83	0.5	0.0656919	0.643667	13	34074274	34078007	1610	52.01	-1	protein_coding	tubulin, beta 2A class IIA [Source:MGI Symbol;Acc:MGI:107861]
ENSMUSG00000058997	Vwa8	78.9	136.4	0.57	0.0857612	0.690647	78.9	136.4	0.78	0.0148188	0.342423	14	78849052	79202310	12639	42.57	1	protein_coding	von Willebrand factor A domain containing 8 [Source:MGI Symbol;Acc:MGI:1919008]
ENSMUSG00000061062	Gm10093	54.3	92.3	0.57	0.0804882	0.68156	54.3	92.3	0.8	0.010341	0.284989	17	78491565	78493541	1977	48.81	1	protein_coding
ENSMUSG00000063632	Sox11	11.6	22.8	0.57	0.129287	0.863089	11.6	22.8	0.56	0.164206	0.815255	12	27334264	27342574	8311	46.48	-1	protein_coding	Transcription factor SOX-11 [Source:UniProtKB/Swiss-Prot;Acc:Q7M6Y2]
ENSMUSG00000067608	Pcna-ps2	114.9	179.7	0.57	0.0190863	0.378606	114.9	179.7	0.62	0.0182386	0.381242	19	9283238	9284494	1257	44.07	1	protein_coding
ENSMUSG00000070643	Sox13	29.4	49.9	0.57	0.0809411	0.681681	29.4	49.9	0.53	0.131484	0.765854	1	133382303	133424377	4312	52.23	-1	protein_coding	Transcription factor SOX-13 [Source:UniProtKB/Swiss-Prot;Acc:Q04891]
ENSMUSG00000070822	Zscan18	0.7	5	0.57	0.0764672	1	0.7	5	0.56	0.119404	1	7	12768090	12803635	4261	44.63	-1	protein_coding	zinc finger and SCAN domain containing 18 [Source:MGI Symbol;Acc:MGI:3643810]
ENSMUSG00000072762	4930522L14Rik	23.3	42.1	0.57	0.10742	0.803263	23.3	42.1	0.7	0.0484885	0.624533	5	109735990	109751886	2409	39.62	-1	protein_coding	RIKEN cDNA 4930522L14 gene [Source:MGI Symbol;Acc:MGI:1925270]
ENSMUSG00000089842	Pitpnm2os2	1.6	5	0.57	0.113854	1	1.6	5	0.56	0.149311	1	5	124194907	124200346	3821	50.68	1	antisense	phosphatidylinositol transfer protein, membrane-associated 2, opposite strand 2 [Source:MGI Symbol;Acc:MGI:3840147]
ENSMUSG00000090023	Gm16302	1.5	6.9	0.57	0.0969618	1	1.5	6.9	0.7	0.0712743	1	9	14845613	14847835	428	45.97	1	lincRNA	predicted gene 16302 [Source:MGI Symbol;Acc:MGI:3826572]
ENSMUSG00000090066	1110002E22Rik	1.4	6.5	0.57	0.0953791	1	1.4	6.5	0.54	0.147169	1	3	138065052	138081506	9998	47.34	1	protein_coding	RIKEN cDNA 1110002E22 gene [Source:MGI Symbol;Acc:MGI:1915066]
ENSMUSG00000091313	Fth-ps2	5.8	12.3	0.57	0.132714	0.867221	5.8	12.3	0.57	0.166155	0.971357	6	39653450	39653965	516	48.45	-1	processed_pseudogene	ferritin heavy chain, pseudogene 2 [Source:MGI Symbol;Acc:MGI:104594]
ENSMUSG00000096157	Gm5472	2	5.5	0.57	0.124239	1	2	5.5	0.57	0.151794	1	15	45978360	45980037	1678	51.37	-1	processed_pseudogene	predicted gene 5472 [Source:MGI Symbol;Acc:MGI:3648309]
ENSMUSG00000096993	Gm26787	1.2	5.3	0.57	0.0992622	1	1.2	5.3	0.58	0.121829	1	9	36767887	36782677	608	40.92	1	antisense	predicted gene, 26787 [Source:MGI Symbol;Acc:MGI:5477281]
ENSMUSG00000097668	Gm26761	0	3.3	0.57	0.0460803	1	0	3.3	0.54	0.0755458	1	5	64695461	64698521	2192	46.36	-1	lincRNA	predicted gene, 26761 [Source:MGI Symbol;Acc:MGI:5477255]
ENSMUSG00000097893	1700034P13Rik	2	6.2	0.57	0.121439	1	2	6.2	0.62	0.117875	1	1	9747648	9791924	3101	42.71	1	antisense	RIKEN cDNA 1700034P13 gene [Source:MGI Symbol;Acc:MGI:1920581]
ENSMUSG00000108910	Gm44625	0.3	3.9	0.57	0.0615884	1	0.3	3.9	0.59	0.0770757	1	7	131401236	131402796	1561	34.98	-1	TEC	predicted gene 44625 [Source:MGI Symbol;Acc:MGI:5753201]
ENSMUSG00000000085	Scmh1	70.3	109	0.56	0.0139554	0.334759	70.3	109	0.59	0.0207521	0.417372	4	120405281	120530186	7731	39.89	1	protein_coding	Polycomb protein SCMH1 [Source:UniProtKB/Swiss-Prot;Acc:Q8K214]
ENSMUSG00000000827	Tpd52l2	169.8	267	0.56	0.0300298	0.459749	169.8	267	0.61	0.0258946	0.461279	2	181497142	181517966	4982	44.51	1	protein_coding	tumor protein D52-like 2 [Source:MGI Symbol;Acc:MGI:1913564]
ENSMUSG00000001630	Stk38l	76.1	121.1	0.56	0.0479679	0.565448	76.1	121.1	0.45	0.112278	0.73761	6	146724995	146778812	4880	42.34	1	protein_coding	Mus musculus serine/threonine kinase 38 like (Stk38l), transcript variant 2, mRNA. [Source:RefSeq mRNA;Acc:NM_001346666]
ENSMUSG00000003808	Farsa	103.8	174.6	0.56	0.0874279	0.69961	103.8	174.6	0.6	0.0749619	0.661884	8	84856989	84869257	4538	48.51	1	protein_coding	Phenylalanine--tRNA ligase alpha subunit [Source:UniProtKB/Swiss-Prot;Acc:Q8C0C7]
ENSMUSG00000014551	Mrps25	116.6	178.5	0.56	0.00647999	0.220257	116.6	178.5	0.59	0.00822172	0.247628	6	92169525	92184033	6576	45.53	-1	protein_coding	28S ribosomal protein S25, mitochondrial [Source:UniProtKB/Swiss-Prot;Acc:Q9D125]
ENSMUSG00000019849	Prep	78.9	120.7	0.56	0.00688638	0.228019	78.9	120.7	0.61	0.00733758	0.237477	10	45067203	45167198	10933	46.14	1	protein_coding	prolyl endopeptidase [Source:MGI Symbol;Acc:MGI:1270863]
ENSMUSG00000020415	Pttg1	106.9	163.4	0.56	0.00977581	0.275153	106.9	163.4	0.53	0.0303629	0.46543	11	43420250	43426251	2000	45.3	-1	protein_coding	Securin [Source:UniProtKB/Swiss-Prot;Acc:Q9CQJ7]
ENSMUSG00000020495	Smg8	21.8	35.5	0.56	0.06591	0.7548	21.8	35.5	0.53	0.115308	0.751645	11	87077732	87086774	3218	44.96	-1	protein_coding	Protein SMG8 [Source:UniProtKB/Swiss-Prot;Acc:Q8VE18]
ENSMUSG00000021365	Nedd9	165.6	251.1	0.56	0.00495848	0.188422	165.6	251.1	0.55	0.0132515	0.335361	13	41309581	41487362	6376	44.18	-1	protein_coding	neural precursor cell expressed, developmentally down-regulated gene 9 [Source:MGI Symbol;Acc:MGI:97302]
ENSMUSG00000022090	Pdlim2	5.7	12.5	0.56	0.139022	0.879322	5.7	12.5	0.57	0.164013	0.963512	14	70164218	70177681	4486	53.59	-1	protein_coding	PDZ and LIM domain protein 2 [Source:UniProtKB/Swiss-Prot;Acc:Q8R1G6]
ENSMUSG00000022297	Fzd6	37.2	59.2	0.56	0.0535161	0.59343	37.2	59.2	0.58	0.0686195	0.669571	15	39006034	39038188	4818	43.87	1	protein_coding	Frizzled-6 [Source:UniProtKB/Swiss-Prot;Acc:Q61089]
ENSMUSG00000023800	Tiam2	32.6	60.8	0.56	0.12151	0.82521	32.6	60.8	0.65	0.0850214	0.714556	17	3326573	3531344	12741	44.57	1	protein_coding	T-lymphoma invasion and metastasis-inducing protein 2 [Source:UniProtKB/Swiss-Prot;Acc:Q6ZPF3]
ENSMUSG00000024151	Msh2	99.9	154.2	0.56	0.0113294	0.297352	99.9	154.2	0.62	0.0090222	0.266458	17	87672330	87723713	5518	45.08	1	protein_coding	DNA mismatch repair protein Msh2 [Source:UniProtKB/Swiss-Prot;Acc:P43247]
ENSMUSG00000024190	Dusp1	254.7	397	0.56	0.0222148	0.404918	254.7	397	0.59	0.0239743	0.422647	17	26505590	26508519	2697	53.34	-1	protein_coding	Dual specificity protein phosphatase 1 [Source:UniProtKB/Swiss-Prot;Acc:P28563]
ENSMUSG00000024287	Thoc1	216.9	330	0.56	0.00422338	0.173997	216.9	330	0.54	0.0129476	0.332496	18	9958180	9995484	3855	37.73	1	protein_coding	THO complex subunit 1 [Source:UniProtKB/Swiss-Prot;Acc:Q8R3N6]
ENSMUSG00000029166	Mapre3	6	13.4	0.56	0.140608	0.900574	6	13.4	0.61	0.137645	0.954302	5	30814641	30866106	3459	47.53	1	protein_coding	Microtubule-associated protein RP/EB family member 3 [Source:UniProtKB/Swiss-Prot;Acc:Q6PER3]
ENSMUSG00000029298	Gbp9	9.3	31.9	0.56	0.112976	0.789098	9.3	31.9	0.48	0.223084	0.871624	5	105077630	105139539	5173	41.81	-1	protein_coding
ENSMUSG00000031609	Sap30	76.7	120.5	0.56	0.0379834	0.509963	76.7	120.5	0.48	0.0859698	0.689905	8	57482707	57487860	1178	41.19	-1	protein_coding	Histone deacetylase complex subunit SAP30 [Source:UniProtKB/Swiss-Prot;Acc:O88574]
ENSMUSG00000031904	Slc7a6	53.9	84.7	0.56	0.0369685	0.505221	53.9	84.7	0.53	0.0676289	0.667391	8	106168857	106198706	4570	44.51	1	protein_coding	Mus musculus solute carrier family 7 (cationic amino acid transporter, y+ system), member 6 (Slc7a6), transcript variant 4, mRNA. [Source:RefSeq mRNA;Acc:NM_001357381]
ENSMUSG00000032207	Lipc	3.5	9.9	0.56	0.129755	1	3.5	9.9	0.55	0.166686	0.977622	9	70798128	70952226	2150	46.26	-1	protein_coding	Hepatic triacylglycerol lipase [Source:UniProtKB/Swiss-Prot;Acc:P27656]
ENSMUSG00000033467	Crlf2	6.9	13.9	0.56	0.135338	1	6.9	13.9	0.68	0.0852585	0.887791	5	109554709	109558993	1495	59.11	-1	protein_coding	cytokine receptor-like factor 2 isoform 1 [Source:RefSeq peptide;Acc:NP_001158207]
ENSMUSG00000034071	Zfp551	2	7	0.56	0.113409	1	2	7	0.56	0.1424	1	7	12415153	12422751	2636	45.64	-1	protein_coding	zinc fingr protein 551 [Source:MGI Symbol;Acc:MGI:3588205]
ENSMUSG00000034848	Ttc21b	35	59.5	0.56	0.0941455	0.707399	35	59.5	0.5	0.164864	0.808197	2	66184327	66256617	9282	40.61	-1	protein_coding	tetratricopeptide repeat domain 21B [Source:MGI Symbol;Acc:MGI:1920918]
ENSMUSG00000035759	Bbs10	1	5.9	0.56	0.0872009	1	1	5.9	0.52	0.136171	1	10	111298679	111301727	3049	44.97	1	protein_coding	Bardet-Biedl syndrome 10 protein homolog [Source:UniProtKB/Swiss-Prot;Acc:Q9DBI2]
ENSMUSG00000038418	Egr1	1310.7	2086	0.56	0.0422295	0.531352	1310.7	2086	0.65	0.017092	0.362291	18	34859823	34864984	4484	57.77	1	protein_coding	Early growth response protein 1 [Source:UniProtKB/Swiss-Prot;Acc:P08046]
ENSMUSG00000040430	Pitpnc1	12.1	22.3	0.56	0.123047	0.867359	12.1	22.3	0.48	0.223257	0.921345	11	107207892	107470699	6612	46.27	-1	protein_coding	Cytoplasmic phosphatidylinositol transfer protein 1 [Source:UniProtKB/Swiss-Prot;Acc:Q8K4R4]
ENSMUSG00000040740	Slc25a34	1.1	4.2	0.56	0.105914	1	1.1	4.2	0.54	0.145713	1	4	141618824	141623821	2670	55.16	-1	protein_coding	Solute carrier family 25 member 34 [Source:UniProtKB/Swiss-Prot;Acc:A2ADF7]
ENSMUSG00000052117	D630039A03Rik	178.1	276.4	0.56	0.0176467	0.376677	178.1	276.4	0.58	0.0251082	0.433263	4	57908483	57916297	2830	47.78	-1	protein_coding	chromosome 9 open reading frame 152 [Source:HGNC Symbol;Acc:HGNC:31455]
ENSMUSG00000055633	Zfp580	3.1	7.6	0.56	0.13638	1	3.1	7.6	0.51	0.210358	1	7	5051538	5053723	1258	58.92	1	protein_coding	zinc finger protein 580 [Source:MGI Symbol;Acc:MGI:1916242]
ENSMUSG00000056999	Ide	213.7	325.9	0.56	0.0027314	0.141859	213.7	325.9	0.57	0.00733202	0.237477	19	37268743	37337852	5823	42.91	-1	protein_coding	insulin-degrading enzyme [Source:RefSeq peptide;Acc:NP_112419]
ENSMUSG00000058013	Sept11	164.8	259.1	0.56	0.0294332	0.466795	164.8	259.1	0.6	0.0285043	0.46543	5	93093437	93176447	9472	45.58	1	protein_coding	septin 11 [Source:MGI Symbol;Acc:MGI:1277214]
ENSMUSG00000062687	Cks1brt	2	5.3	0.56	0.130738	1	2	5.3	0.52	0.191063	1	8	85151924	85173622	2399	40.41	1	protein_coding	CDC28 protein kinase 1b, retrogene [Source:MGI Symbol;Acc:MGI:3643620]
ENSMUSG00000068245	Phf11d	14.5	28.8	0.56	0.13544	0.875626	14.5	28.8	0.5	0.220821	0.890853	14	59347407	59365470	4498	43.45	-1	protein_coding	PHD finger protein 11 [Source:UniProtKB/Swiss-Prot;Acc:A6H5X4]
ENSMUSG00000072845	Tmprss11a	4.8	24.2	0.56	#N/A	#N/A	4.8	24.2	0.81	0.0424813	0.747105	5	86410410	86468990	5715	38.36	-1	protein_coding	Transmembrane protease serine 11A [Source:UniProtKB/Swiss-Prot;Acc:Q3UQ41]
ENSMUSG00000074457	S100a16	112.3	170.9	0.56	0.00852936	0.253709	112.3	170.9	0.53	0.0269095	0.455505	3	90537254	90543151	1617	53.53	1	protein_coding	Mus musculus S100 calcium binding protein A16 (S100a16), transcript variant 1, mRNA. [Source:RefSeq mRNA;Acc:NM_001356605]
ENSMUSG00000074785	Plxnc1	12.7	23.5	0.56	0.124185	0.868769	12.7	23.5	0.65	0.0906179	0.730776	10	94790866	94944835	8349	45.25	-1	protein_coding	Plexin-C1 [Source:UniProtKB/Swiss-Prot;Acc:Q9QZC2]
ENSMUSG00000078862	Gm14326	6.9	16.9	0.56	0.137733	0.894065	6.9	16.9	0.6	0.140135	0.955277	2	177935993	177957297	2863	41.37	-1	protein_coding
ENSMUSG00000082095	Gm11991	0.3	3.2	0.56	0.0692692	1	0.3	3.2	0.52	0.106592	1	11	8884223	8885296	1074	45.16	-1	processed_pseudogene	predicted gene 11991 [Source:MGI Symbol;Acc:MGI:3651121]
ENSMUSG00000083215	Rbmx2-ps	5.4	11.2	0.56	0.136274	0.95834	5.4	11.2	0.52	0.199538	0.98668	2	142576928	142577857	930	49.78	1	processed_pseudogene	RNA binding motif protein, X-linked 2, pseudogene [Source:MGI Symbol;Acc:MGI:3651105]
ENSMUSG00000084342	Gm11224	44.1	69.3	0.56	0.0269278	0.502918	44.1	69.3	0.6	0.0358318	0.513541	4	69954166	69955276	1111	51.67	-1	processed_pseudogene	predicted gene 11224 [Source:MGI Symbol;Acc:MGI:3651640]
ENSMUSG00000085329	2810404F17Rik	17.7	31.8	0.56	0.118661	0.862585	17.7	31.8	0.51	0.191672	0.879133	16	95806029	95808317	1704	45.7	-1	lincRNA	RIKEN cDNA 2810404F17 gene [Source:MGI Symbol;Acc:MGI:1917218]
ENSMUSG00000087266	Gm15991	6.9	14.5	0.56	0.137172	1	6.9	14.5	0.56	0.167191	0.972258	8	67956769	67978051	4148	40.5	1	antisense	predicted gene 15991 [Source:MGI Symbol;Acc:MGI:3801813]
ENSMUSG00000089804	Gm16136	44	69.2	0.56	0.0395978	0.513261	44	69.2	0.53	0.0787935	0.663954	15	37231793	37233309	1294	51.55	-1	antisense	predicted gene 16136 [Source:MGI Symbol;Acc:MGI:3802137]
ENSMUSG00000093651	Gm5873	15.5	26.7	0.56	0.1147	0.790875	15.5	26.7	0.48	0.207387	0.905327	6	6735427	6736492	1066	51.22	-1	processed_pseudogene	predicted gene 5873 [Source:MGI Symbol;Acc:MGI:3648385]
ENSMUSG00000099655	2310034G01Rik	7.8	16.4	0.56	0.14117	0.882671	7.8	16.4	0.57	0.161991	0.961813	19	46348201	46350302	1373	57.37	-1	protein_coding	RIKEN cDNA 2310034G01 gene [Source:MGI Symbol;Acc:MGI:1922829]
ENSMUSG00000104467	Gm37660	36.1	65.2	0.56	0.116285	0.7548	36.1	65.2	0.79	0.0133625	0.342182	9	71840005	71841736	1732	40.88	-1	TEC	predicted gene, 37660 [Source:MGI Symbol;Acc:MGI:5610888]
ENSMUSG00000109679	Gm45342	13.7	25.1	0.56	0.125231	0.862585	13.7	25.1	0.64	0.100565	0.749383	8	25692146	25693508	1363	42.41	1	TEC	predicted gene 45342 [Source:MGI Symbol;Acc:MGI:5791178]
ENSMUSG00000110282	B930086L07Rik	19.1	35.5	0.56	0.11909	0.758404	19.1	35.5	0.7	0.0590499	0.634166	7	133116534	133120271	3738	42.27	-1	TEC	RIKEN cDNA B930086L07 gene [Source:MGI Symbol;Acc:MGI:2443202]
ENSMUSG00000112405	Fkbp1a-ps2	1.4	5.1	0.56	0.10954	1	1.4	5.1	0.56	0.13855	1	10	21410263	21410573	311	49.84	-1	processed_pseudogene	FK506 binding protein 1a, pseudogene 2 [Source:MGI Symbol;Acc:MGI:107772]
ENSMUSG00000001249	Hpn	29	50.4	0.55	0.106845	0.739214	29	50.4	0.57	0.124467	0.757473	7	31098725	31115290	4101	51.94	-1	protein_coding	Serine protease hepsin Serine protease hepsin non-catalytic chain Serine protease hepsin catalytic chain [Source:UniProtKB/Swiss-Prot;Acc:O35453]
ENSMUSG00000001750	Tcirg1	107.9	178.5	0.55	0.0808138	0.681681	107.9	178.5	0.66	0.0332586	0.478809	19	3896050	3907133	4470	53.89	-1	protein_coding	T cell, immune regulator 1, ATPase, H+ transporting, lysosomal V0 protein A3 [Source:MGI Symbol;Acc:MGI:1350931]
ENSMUSG00000005470	Asf1b	30	57.2	0.55	0.139944	0.849968	30	57.2	0.55	0.156592	0.808197	8	83955507	83970197	2338	44.79	1	protein_coding	Histone chaperone ASF1B [Source:UniProtKB/Swiss-Prot;Acc:Q9DAP7]
ENSMUSG00000006932	Ctnnb1	219.6	340.2	0.55	0.0385833	0.50958	219.6	340.2	0.55	0.0537847	0.598895	9	120929216	120960507	5192	46.34	1	protein_coding	Catenin beta-1 [Source:UniProtKB/Swiss-Prot;Acc:Q02248]
ENSMUSG00000018574	Acadvl	9.3	23.4	0.55	0.14195	0.882671	9.3	23.4	0.65	0.112496	0.757473	11	70010183	70015411	2686	54.75	-1	protein_coding	acyl-Coenzyme A dehydrogenase, very long chain [Source:MGI Symbol;Acc:MGI:895149]
ENSMUSG00000020330	Hmmr	77.8	130.2	0.55	0.104338	0.728619	77.8	130.2	0.45	0.198212	0.84324	11	40701395	40733422	5431	40.73	-1	protein_coding	Hyaluronan mediated motility receptor [Source:UniProtKB/Swiss-Prot;Acc:Q00547]
ENSMUSG00000020739	Nup85	98.4	162.9	0.55	0.0850291	0.690647	98.4	162.9	0.67	0.0284989	0.471341	11	115564434	115583985	3385	46.39	1	protein_coding	Nuclear pore complex protein Nup85 [Source:UniProtKB/Swiss-Prot;Acc:Q8R480]
ENSMUSG00000020843	Timm22	67.8	107.7	0.55	0.0498909	0.577081	67.8	107.7	0.61	0.0419517	0.547052	11	76406952	76416292	3183	46.69	1	protein_coding	Mitochondrial import inner membrane translocase subunit Tim22 [Source:UniProtKB/Swiss-Prot;Acc:Q9CQ85]
ENSMUSG00000021396	Nxnl2	13.9	31	0.55	0.145257	0.894171	13.9	31	0.59	0.145714	0.830624	13	51171022	51175188	3505	50.8	1	protein_coding	Nucleoredoxin-like protein 2 [Source:UniProtKB/Swiss-Prot;Acc:Q9D531]
ENSMUSG00000026566	Mpzl1	222.4	338.3	0.55	0.013356	0.322336	222.4	338.3	0.5	0.0291069	0.471341	1	165592240	165634538	3550	45.09	-1	protein_coding	myelin protein zero-like 1 [Source:MGI Symbol;Acc:MGI:1915731]
ENSMUSG00000026858	Miga2	8	17.5	0.55	0.145458	0.889123	8	17.5	0.65	0.111872	0.925073	2	30364233	30385521	6249	53.08	1	protein_coding	Mitoguardin 2 [Source:UniProtKB/Swiss-Prot;Acc:Q8BK03]
ENSMUSG00000026986	Hnmt	1	9.7	0.55	0.0723864	1	1	9.7	0.6	0.0779406	1	2	24002910	24049394	1769	38.77	-1	protein_coding	Histamine N-methyltransferase [Source:UniProtKB/Swiss-Prot;Acc:Q91VF2]
ENSMUSG00000027860	Vangl1	17.5	32.1	0.55	0.131707	0.862585	17.5	32.1	0.55	0.161142	0.812042	3	102153583	102204693	7156	47.33	-1	protein_coding	VANGL planar cell polarity 1 [Source:MGI Symbol;Acc:MGI:2159344]
ENSMUSG00000028017	Egf	60.4	111	0.55	0.135152	0.782865	60.4	111	0.55	0.151122	0.795358	3	129677565	129755316	11275	43.94	-1	protein_coding	Mus musculus epidermal growth factor (Egf), transcript variant 3, mRNA. [Source:RefSeq mRNA;Acc:NM_001329594]
ENSMUSG00000031671	Setd6	41.1	67.5	0.55	0.0842596	0.690647	41.1	67.5	0.6	0.0653402	0.661884	8	95715881	95719010	1903	51.92	1	protein_coding	N-lysine methyltransferase SETD6 [Source:UniProtKB/Swiss-Prot;Acc:Q9CWY3]
ENSMUSG00000032571	Pik3r4	40.6	72.3	0.55	0.120804	0.755316	40.6	72.3	0.8	0.0134259	0.342423	9	105642978	105687657	9660	45.37	1	protein_coding	Phosphoinositide 3-kinase regulatory subunit 4 [Source:UniProtKB/Swiss-Prot;Acc:Q8VD65]
ENSMUSG00000037053	Azgp1	11.6	35.5	0.55	0.130143	0.877238	11.6	35.5	0.59	0.143047	0.84261	5	137981520	137990233	1610	45.19	1	protein_coding	Zinc-alpha-2-glycoprotein [Source:UniProtKB/Swiss-Prot;Acc:Q64726]
ENSMUSG00000037287	Tbcel	65.5	102.4	0.55	0.0309806	0.466795	65.5	102.4	0.56	0.0484972	0.571114	9	42412316	42507809	8483	44.74	-1	protein_coding	Mus musculus tubulin folding cofactor E-like (Tbcel), transcript variant 3, mRNA. [Source:RefSeq mRNA;Acc:NM_001357657]
ENSMUSG00000037492	Zmat4	3.4	12.3	0.55	0.117328	1	3.4	12.3	0.64	0.105033	0.899619	8	23636019	24156585	8310	42.82	1	protein_coding	zinc finger, matrin type 4 [Source:MGI Symbol;Acc:MGI:2443497]
ENSMUSG00000038668	Lpar1	52.9	82.7	0.55	0.0430771	0.537588	52.9	82.7	0.44	0.115142	0.751645	4	58435255	58553898	4289	42.4	-1	protein_coding	Lysophosphatidic acid receptor 1 [Source:UniProtKB/Swiss-Prot;Acc:P61793]
ENSMUSG00000039474	Wfs1	45.6	75.3	0.55	0.080911	0.681681	45.6	75.3	0.61	0.0629182	0.626737	5	36966104	36989205	3787	53.77	-1	protein_coding	wolframin ER transmembrane glycoprotein [Source:MGI Symbol;Acc:MGI:1328355]
ENSMUSG00000039929	Urb1	15.5	30.8	0.55	0.147444	0.88903	15.5	30.8	0.56	0.16463	0.856143	16	90751527	90810413	8190	48.38	-1	protein_coding	URB1 ribosome biogenesis 1 homolog (S. cerevisiae) [Source:MGI Symbol;Acc:MGI:2146468]
ENSMUSG00000040385	Ppp1ca	327.7	504.7	0.55	0.0210498	0.404918	327.7	504.7	0.56	0.0298981	0.46543	19	4192158	4195419	1379	55.98	1	protein_coding	protein phosphatase 1, catalytic subunit, alpha isoform [Source:MGI Symbol;Acc:MGI:103016]
ENSMUSG00000044937	Ttc41	13.7	24.8	0.55	0.127984	0.875564	13.7	24.8	0.57	0.14138	0.800269	10	86705811	86776844	5339	44.66	1	protein_coding	tetratricopeptide repeat domain 41 [Source:MGI Symbol;Acc:MGI:2387653]
ENSMUSG00000052911	Lamb2	6.7	13.4	0.55	0.142538	0.902648	6.7	13.4	0.55	0.178493	0.975086	9	108479736	108490530	6082	55.75	1	protein_coding	Laminin subunit beta-2 [Source:UniProtKB/Swiss-Prot;Acc:Q61292]
ENSMUSG00000053897	Slc39a8	283.2	442.1	0.55	0.0334113	0.478165	283.2	442.1	0.56	0.0452812	0.541534	3	135825279	135888572	7664	41.62	1	protein_coding	Zinc transporter ZIP8 [Source:UniProtKB/Swiss-Prot;Acc:Q91W10]
ENSMUSG00000055128	Cgrrf1	41.2	68.2	0.55	0.0772978	0.674138	41.2	68.2	0.56	0.0985641	0.732421	14	46832125	46854193	3796	43.16	1	protein_coding	Cell growth regulator with RING finger domain protein 1 [Source:UniProtKB/Swiss-Prot;Acc:Q8BMJ7]
ENSMUSG00000057329	Bcl2	64.4	102	0.55	0.0604695	0.621246	64.4	102	0.5	0.10358	0.731648	1	106538178	106714274	9157	42.96	-1	protein_coding	Apoptosis regulator Bcl-2 [Source:UniProtKB/Swiss-Prot;Acc:P10417]
ENSMUSG00000066682	Pilrb2	3.5	8.1	0.55	0.147759	0.95834	3.5	8.1	0.54	0.186535	0.98668	5	137865827	137871815	1957	46.33	-1	protein_coding	Paired immunoglobulin-like type 2 receptor beta-2 [Source:UniProtKB/Swiss-Prot;Acc:Q2YFS1]
ENSMUSG00000066878	Gm10184	32.1	51.8	0.55	0.0629498	0.632143	32.1	51.8	0.52	0.114608	0.740883	17	89908511	89910449	1939	45.69	-1	protein_coding	predicted pseudogene 10184 [Source:MGI Symbol;Acc:MGI:3704480]
ENSMUSG00000071669	Snx29	10.2	21.4	0.55	0.144243	0.877238	10.2	21.4	0.75	0.0530494	0.626737	16	11322908	11755472	6435	46.5	1	protein_coding	Sorting nexin-29 [Source:UniProtKB/Swiss-Prot;Acc:Q9D3S3]
ENSMUSG00000074704	Rad21l	0.7	8.3	0.55	0.0708375	1	0.7	8.3	0.82	0.0276096	1	2	151645404	151668533	1659	36.34	-1	protein_coding	Double-strand-break repair protein rad21-like protein 1 [Source:UniProtKB/Swiss-Prot;Acc:A2AU37]
ENSMUSG00000075266	Cenpw	69.2	107.8	0.55	0.0287146	0.447752	69.2	107.8	0.56	0.0470715	0.577986	10	30194569	30200560	4211	39.35	-1	protein_coding	Centromere protein W [Source:UniProtKB/Swiss-Prot;Acc:Q3URR0]
ENSMUSG00000081157	Gm13552	8.1	15.2	0.55	0.136133	0.903907	8.1	15.2	0.54	0.178331	0.971515	2	59564268	59564684	417	55.16	-1	processed_pseudogene	predicted gene 13552 [Source:MGI Symbol;Acc:MGI:3650819]
ENSMUSG00000085521	4930526A20Rik	9.4	19.1	0.55	0.143147	0.912322	9.4	19.1	0.61	0.128043	0.949981	17	28075050	28076677	1628	54.48	-1	transcribed_processed_pseudogene	RIKEN cDNA 4930526A20 gene [Source:MGI Symbol;Acc:MGI:3612449]
ENSMUSG00000086999	Bcas1os2	3.6	8.6	0.55	0.142826	1	3.6	8.6	0.57	0.161416	0.969255	2	170356361	170380435	1174	45.08	1	antisense	breast carcinoma amplified sequence 1, opposite strand 2 [Source:MGI Symbol;Acc:MGI:1920553]
ENSMUSG00000091144	Phf11c	5.8	12.9	0.55	0.145252	1	5.8	12.9	0.68	0.0946237	0.897167	14	59380833	59395381	3459	41.95	-1	protein_coding
ENSMUSG00000096349	Gm22513	17.9	30.3	0.55	0.0980162	0.722044	17.9	30.3	0.54	0.138517	0.796155	12	54696782	54696945	164	56.1	1	snRNA	predicted gene, 22513 [Source:MGI Symbol;Acc:MGI:5452290]
ENSMUSG00000097464	Gm26736	2.8	7.3	0.55	0.139162	1	2.8	7.3	0.55	0.170464	1	6	4946568	4947803	1236	41.34	1	TEC	predicted gene, 26736 [Source:MGI Symbol;Acc:MGI:5477230]
ENSMUSG00000103149	AA914427	0.8	10.1	0.55	0.0680011	1	0.8	10.1	0.77	0.0320278	1	16	17922043	17923208	1166	49.57	1	TEC	EST AA914427 [Source:MGI Symbol;Acc:MGI:1858439]
ENSMUSG00000103207	Gm9874	3.3	7.3	0.55	0.149345	1	3.3	7.3	0.52	0.204272	1	17	30484661	30486124	1464	47.13	1	TEC	predicted gene 9874 [Source:MGI Symbol;Acc:MGI:3642006]
ENSMUSG00000105412	Gm43768	3.2	9.6	0.55	0.127159	1	3.2	9.6	0.6	0.129442	1	3	94575777	94577034	1258	40.3	-1	sense_intronic	predicted gene 43768 [Source:MGI Symbol;Acc:MGI:5663905]
ENSMUSG00000107596	Gm18913	39.9	62.7	0.55	0.0363419	0.496295	39.9	62.7	0.59	0.0454869	0.590506	6	65432160	65433948	1789	40.75	1	processed_pseudogene	predicted gene, 18913 [Source:MGI Symbol;Acc:MGI:5011098]
ENSMUSG00000109864	Eid3	3.5	7.9	0.55	0.143675	1	3.5	7.9	0.53	0.187636	1	10	82866626	82867930	1305	47.28	1	protein_coding	EP300-interacting inhibitor of differentiation 3 [Source:UniProtKB/Swiss-Prot;Acc:Q3V124]
ENSMUSG00000112411	Gm19337	5.3	11.5	0.55	0.146858	1	5.3	11.5	0.55	0.180134	0.971742	10	63250932	63252515	1584	37.18	1	TEC
ENSMUSG00000112489	AC165249.1	5.1	14	0.55	0.13465	0.902648	5.1	14	0.65	0.106985	0.921039	12	79088705	79103939	2019	44.79	-1	lincRNA
ENSMUSG00000114103	Gm8557	3.4	7.7	0.55	0.147769	0.95834	3.4	7.7	0.6	0.141246	0.956972	12	87420511	87420985	475	48.63	1	processed_pseudogene	predicted gene 8557 [Source:MGI Symbol;Acc:MGI:3649080]
ENSMUSG00000114584	Gm47694	4.8	13.2	0.55	0.13874	0.875626	4.8	13.2	0.67	0.100915	0.907639	14	60210974	60216419	5446	45.01	-1	TEC	predicted gene, 47694 [Source:MGI Symbol;Acc:MGI:6096803]
ENSMUSG00000116021	AC133868.1	13.5	29	0.55	0.147413	0.889123	13.5	29	0.72	0.0732094	0.660515	15	100089891	100091757	1867	43.17	-1	TEC
ENSMUSG00000000320	Alox12	1.9	6.9	0.54	0.121884	1	1.9	6.9	0.54	0.155716	1	11	70241457	70255353	4085	48.86	-1	protein_coding	arachidonate 12-lipoxygenase [Source:MGI Symbol;Acc:MGI:87998]
ENSMUSG00000001020	S100a4	0	4.5	0.54	0.0532755	1	0	4.5	0.51	0.0846012	1	3	90603771	90606045	584	48.53	1	protein_coding	S100 calcium binding protein A4 [Source:MGI Symbol;Acc:MGI:1330282]
ENSMUSG00000005503	Evx1	7.4	20.7	0.54	0.141081	0.878418	7.4	20.7	0.49	0.225534	0.994375	6	52313498	52318378	2877	58.84	1	protein_coding	Homeobox even-skipped homolog protein 1 [Source:UniProtKB/Swiss-Prot;Acc:P23683]
ENSMUSG00000016946	Kctd5	70.8	108.7	0.54	0.0340292	0.482999	70.8	108.7	0.44	0.0964758	0.700606	17	24047734	24073485	2751	49.05	-1	protein_coding	potassium channel tetramerization domain containing 5 [Source:HGNC Symbol;Acc:HGNC:21423]
ENSMUSG00000020491	2810021J22Rik	15	44.9	0.54	0.134432	0.865436	15	44.9	0.72	0.0750781	0.689762	11	58867216	58883288	3928	44.7	1	protein_coding	RIKEN cDNA 2810021J22 gene [Source:MGI Symbol;Acc:MGI:1917194]
ENSMUSG00000022248	Rad1	33.7	52.8	0.54	0.0494216	0.578459	33.7	52.8	0.58	0.0568015	0.641966	15	10486018	10499063	7400	42.49	1	protein_coding	Cell cycle checkpoint protein RAD1 [Source:UniProtKB/Swiss-Prot;Acc:Q9QWZ1]
ENSMUSG00000022462	Slc38a2	715	1098.3	0.54	0.0287814	0.448052	715	1098.3	0.57	0.0282325	0.461279	15	96687392	96699730	8838	45.84	-1	protein_coding	Sodium-coupled neutral amino acid transporter 2 [Source:UniProtKB/Swiss-Prot;Acc:Q8CFE6]
ENSMUSG00000022761	Lztr1	124.1	195.2	0.54	0.0521054	0.584383	124.1	195.2	0.56	0.0544487	0.601081	16	17508968	17526331	3112	50.44	1	protein_coding	Mus musculus leucine-zipper-like transcriptional regulator, 1 (Lztr1), transcript variant 2, mRNA. [Source:RefSeq mRNA;Acc:NM_001331226]
ENSMUSG00000022849	Hspbap1	25.6	44.8	0.54	0.128382	0.875626	25.6	44.8	0.61	0.0885733	0.704639	16	35770386	35828446	4590	44.24	1	protein_coding	HSPB1-associated protein 1 [Source:UniProtKB/Swiss-Prot;Acc:Q8BK58]
ENSMUSG00000024070	Prkd3	64.4	103.7	0.54	0.0866288	0.692804	64.4	103.7	0.47	0.152622	0.798921	17	78949405	79020816	11017	40.44	-1	protein_coding	protein kinase D3 [Source:MGI Symbol;Acc:MGI:1922542]
ENSMUSG00000024892	Pcx	13.5	26.9	0.54	0.152512	0.894065	13.5	26.9	0.63	0.11523	0.804396	19	4510472	4621752	4637	46.22	1	protein_coding	pyruvate carboxylase [Source:HGNC Symbol;Acc:HGNC:8636]
ENSMUSG00000024924	Vldlr	198	336.1	0.54	0.113516	0.744362	198	336.1	0.56	0.107612	0.739224	19	27216484	27254231	10068	43.62	1	protein_coding	very low density lipoprotein receptor [Source:MGI Symbol;Acc:MGI:98935]
ENSMUSG00000025014	Dntt	0	2.9	0.54	0.0548298	1	0	2.9	0.5	0.0917973	1	19	41029275	41059523	2128	46.12	1	protein_coding	DNA nucleotidylexotransferase [Source:UniProtKB/Swiss-Prot;Acc:P09838]
ENSMUSG00000025202	Scd3	0.6	8.7	0.54	0.0685649	1	0.6	8.7	0.6	0.079864	1	19	44203288	44244016	3470	44.18	1	protein_coding	Acyl-CoA desaturase 3 [Source:UniProtKB/Swiss-Prot;Acc:Q99PL7]
ENSMUSG00000025511	Tspan4	4.8	17.8	0.54	0.123806	0.889123	4.8	17.8	0.55	0.149247	0.953369	7	141475240	141493427	2178	53.88	1	protein_coding	tetraspanin 4 [Source:MGI Symbol;Acc:MGI:1928097]
ENSMUSG00000027115	Kif18a	26.3	44.3	0.54	0.108337	0.735871	26.3	44.3	0.54	0.137976	0.837282	2	109280738	109341747	9832	36.76	1	protein_coding	Kinesin-like protein KIF18A [Source:UniProtKB/Swiss-Prot;Acc:Q91WD7]
ENSMUSG00000027381	Bcl2l11	25.7	50.6	0.54	0.148788	0.803263	25.7	50.6	0.4	0.314653	0.92421	2	128126038	128162547	8029	48.13	1	protein_coding	Bcl-2-like protein 11 [Source:UniProtKB/Swiss-Prot;Acc:O54918]
ENSMUSG00000027963	Extl2	29.5	50.9	0.54	0.122404	0.763996	29.5	50.9	0.53	0.16301	0.838692	3	116007462	116029017	3447	43.81	1	protein_coding	Exostosin-like 2 [Source:UniProtKB/Swiss-Prot;Acc:Q9ES89]
ENSMUSG00000028701	Lurap1	4.6	11.4	0.54	0.144858	1	4.6	11.4	0.56	0.167762	1	4	116132406	116151338	5886	47.48	-1	protein_coding	leucine rich adaptor protein 1 [Source:MGI Symbol;Acc:MGI:1915325]
ENSMUSG00000028845	Tekt2	1.8	11.4	0.54	0.0946423	1	1.8	11.4	0.71	0.0598176	0.823342	4	126322121	126325688	1900	55.1	-1	protein_coding	Mus musculus tektin 2 (Tekt2), transcript variant 2, mRNA. [Source:RefSeq mRNA;Acc:NM_001357262]
ENSMUSG00000029088	Kcnip4	1.6	6.3	0.54	0.118244	1	1.6	6.3	0.49	0.182719	1	5	48389502	49524907	3627	37.78	-1	protein_coding	Kv channel interacting protein 4 [Source:MGI Symbol;Acc:MGI:1933131]
ENSMUSG00000029410	Ppef2	0.8	5.4	0.54	0.087944	1	0.8	5.4	0.52	0.134153	1	5	92226679	92256278	2983	45.88	-1	protein_coding	Serine/threonine-protein phosphatase with EF-hands 2 [Source:UniProtKB/Swiss-Prot;Acc:O35385]
ENSMUSG00000032359	Ctsh	102.7	157.7	0.54	0.0372179	0.502648	102.7	157.7	0.49	0.0761219	0.658927	9	90054152	90076089	4499	47.74	1	protein_coding	cathepsin H [Source:MGI Symbol;Acc:MGI:107285]
ENSMUSG00000032579	Hemk1	24.2	43.4	0.54	0.131713	0.782865	24.2	43.4	0.73	0.0352608	0.542633	9	107327084	107338350	3646	51.84	-1	protein_coding	HemK methyltransferase family member 1 [Source:UniProtKB/Swiss-Prot;Acc:Q921L7]
ENSMUSG00000033065	Pfkm	10.8	21.8	0.54	0.153014	0.889978	10.8	21.8	0.56	0.167826	0.819065	15	98092589	98132451	3340	48.49	1	protein_coding	Mus musculus phosphofructokinase, muscle (Pfkm), transcript variant 4, mRNA. [Source:RefSeq mRNA;Acc:NM_001357688]
ENSMUSG00000035557	Krt17	0	6.6	0.54	0.0540229	1	0	6.6	0.71	0.0320806	1	11	100256217	100261029	1551	54.39	-1	protein_coding	Keratin, type I cytoskeletal 17 [Source:UniProtKB/Swiss-Prot;Acc:Q9QWL7]
ENSMUSG00000036854	Hspb6	14.8	30.6	0.54	0.151233	0.843544	14.8	30.6	0.58	0.157	0.808197	7	30552178	30555443	2299	55.7	1	protein_coding	Heat shock protein beta-6 [Source:UniProtKB/Swiss-Prot;Acc:Q5EBG6]
ENSMUSG00000037376	Trmt6	146.8	223.1	0.54	0.0186398	0.377157	146.8	223.1	0.54	0.0327794	0.498731	2	132804207	132816055	5384	44.58	-1	protein_coding	Mus musculus tRNA methyltransferase 6 (Trmt6), transcript variant 2, mRNA. [Source:RefSeq mRNA;Acc:NM_001356442]
ENSMUSG00000037447	Arid5a	35.5	63.5	0.54	0.135626	0.783532	35.5	63.5	0.67	0.0661474	0.655575	1	36307733	36324029	12540	53.91	1	protein_coding	AT-rich interactive domain-containing protein 5A [Source:UniProtKB/Swiss-Prot;Acc:Q3U108]
ENSMUSG00000042414	Prdm14	2	9.4	0.54	0.107781	1	2	9.4	0.55	0.129096	0.943681	1	13113457	13127163	2564	46.33	-1	protein_coding	PR domain containing 14 [Source:MGI Symbol;Acc:MGI:3588194]
ENSMUSG00000044748	Defb1	136.5	256.7	0.54	0.150415	0.803263	136.5	256.7	0.42	0.305806	0.924605	8	21776599	21795185	872	40.15	1	protein_coding	Beta-defensin 1 [Source:UniProtKB/Swiss-Prot;Acc:P56386]
ENSMUSG00000046334	Gm6195	27.5	43.3	0.54	0.0744105	0.757041	27.5	43.3	0.53	0.114338	0.771494	1	9802197	9802553	357	43.42	-1	processed_pseudogene	predicted pseudogene 6195 [Source:MGI Symbol;Acc:MGI:3647661]
ENSMUSG00000050192	Eif5a2	0.6	11.7	0.54	#N/A	#N/A	0.6	11.7	0.61	0.0642721	0.830624	3	28781276	28798846	5027	41.3	1	protein_coding	Eukaryotic translation initiation factor 5A-2 [Source:UniProtKB/Swiss-Prot;Acc:Q8BGY2]
ENSMUSG00000053038	Gm6180	31.9	58.5	0.54	0.144818	0.797729	31.9	58.5	0.63	0.102373	0.739224	8	42246911	42247408	498	51.2	1	processed_pseudogene	predicted pseudogene 6180 [Source:MGI Symbol;Acc:MGI:3643972]
ENSMUSG00000058050	Gm9234	15	26.4	0.54	0.139437	0.889123	15	26.4	0.49	0.216721	0.899619	7	121015142	121015633	492	49.39	-1	processed_pseudogene	predicted pseudogene 9234 [Source:MGI Symbol;Acc:MGI:3648545]
ENSMUSG00000058135	Gstm1	172.5	265.5	0.54	0.0344635	0.496239	172.5	265.5	0.51	0.0617203	0.620363	3	108012255	108017973	1473	51.3	-1	protein_coding	Glutathione S-transferase Mu 1 [Source:UniProtKB/Swiss-Prot;Acc:P10649]
ENSMUSG00000063364	3300002I08Rik	1.8	5.5	0.54	0.13128	1	1.8	5.5	0.5	0.190373	1	2	150310935	150362765	2117	40.85	-1	protein_coding	RIKEN cDNA 3300002I08 gene [Source:MGI Symbol;Acc:MGI:1916527]
ENSMUSG00000064626	Gm22306	9.1	18	0.54	0.151392	0.889123	9.1	18	0.61	0.120485	0.924605	2	37282051	37282157	107	46.73	1	snRNA	predicted gene, 22306 [Source:MGI Symbol;Acc:MGI:5452083]
ENSMUSG00000068115	Ninl	12	21.9	0.54	0.146513	0.889123	12	21.9	0.65	0.0946211	0.739224	2	150934519	151039382	5952	45.48	-1	protein_coding	Ninein-like protein [Source:UniProtKB/Swiss-Prot;Acc:Q6ZQ12]
ENSMUSG00000069305	Hist1h4n	16.4	26.5	0.54	0.102999	0.765092	16.4	26.5	0.51	0.163549	0.868167	13	21831767	21832196	430	59.07	-1	protein_coding	histone cluster 1, H4n [Source:MGI Symbol;Acc:MGI:4843992]
ENSMUSG00000070407	Hs3st3b1	50.1	82.6	0.54	0.0865345	0.698186	50.1	82.6	0.69	0.0310381	0.475787	11	63885792	63922290	4911	48.31	-1	protein_coding	Heparan sulfate glucosamine 3-O-sulfotransferase 3B1 [Source:UniProtKB/Swiss-Prot;Acc:Q9QZS6]
ENSMUSG00000071291	Zfp58	7.6	17.4	0.54	0.15116	0.889123	7.6	17.4	0.46	0.259046	0.997997	13	67490167	67500555	2435	41.01	-1	protein_coding	zinc finger protein 58 [Source:MGI Symbol;Acc:MGI:99205]
ENSMUSG00000075312	Gm13597	6	14	0.54	0.150458	0.912322	6	14	0.57	0.165388	0.971357	2	68554555	68554929	375	53.87	1	processed_pseudogene	predicted gene 13597 [Source:MGI Symbol;Acc:MGI:3651139]
ENSMUSG00000082092	Gm14665	0.3	3.7	0.54	0.0742715	1	0.3	3.7	0.53	0.0971069	1	X	61389027	61389583	557	47.76	1	processed_pseudogene	predicted gene 14665 [Source:MGI Symbol;Acc:MGI:3705438]
ENSMUSG00000082284	H3f3a-ps1	3.5	7.3	0.54	0.15631	1	3.5	7.3	0.51	0.214484	1	X	101824515	101824924	410	50	1	processed_pseudogene	H3 histone, family 3A, pseudogene 1 [Source:MGI Symbol;Acc:MGI:1101782]
ENSMUSG00000083764	Gm11516	6.8	13.2	0.54	0.150922	1	6.8	13.2	0.52	0.196472	0.98668	11	90859767	90861348	1582	45.83	-1	processed_pseudogene	predicted gene 11516 [Source:MGI Symbol;Acc:MGI:3649759]
ENSMUSG00000086779	Gm13562	1.6	6.6	0.54	0.115235	1	1.6	6.6	0.53	0.145268	1	2	26352645	26371952	1344	53.67	1	processed_transcript	predicted gene 13562 [Source:MGI Symbol;Acc:MGI:3651238]
ENSMUSG00000087259	2610035D17Rik	57.2	87.7	0.54	0.0339947	0.482999	57.2	87.7	0.52	0.0660736	0.644766	11	113043895	113201838	2121	49.32	-1	lincRNA	RIKEN cDNA 2610035D17 gene [Source:MGI Symbol;Acc:MGI:1919636]
ENSMUSG00000087963	Gm25394	1.6	5.1	0.54	0.135408	1	1.6	5.1	0.55	0.152846	1	13	49684301	49684433	133	51.88	1	snoRNA	predicted gene, 25394 [Source:MGI Symbol;Acc:MGI:5455171]
ENSMUSG00000090397	Gm17096	10.5	29.4	0.54	0.1435	0.881271	10.5	29.4	0.57	0.161224	0.836688	2	166943539	166944308	733	44.03	1	antisense	predicted gene 17096 [Source:MGI Symbol;Acc:MGI:4937923]
ENSMUSG00000091019	Gm7502	2.2	12.8	0.54	0.096325	1	2.2	12.8	0.61	0.0929168	1	18	7932782	7933514	733	51.98	1	processed_pseudogene	predicted gene 7502 [Source:MGI Symbol;Acc:MGI:3643245]
ENSMUSG00000098985	Gm27219	21.7	35.3	0.54	0.0880959	0.794935	21.7	35.3	0.59	0.0864511	0.700606	9	36813133	36813874	742	47.44	-1	processed_pseudogene	predicted gene 27219 [Source:MGI Symbol;Acc:MGI:5521062]
ENSMUSG00000101059	Gm4017	2.1	7.6	0.54	0.118643	1	2.1	7.6	0.6	0.133918	1	Y	1268548	1268885	338	42.31	-1	processed_pseudogene	predicted gene 4017 [Source:MGI Symbol;Acc:MGI:3782191]
ENSMUSG00000104145	D130019J16Rik	3.4	8.1	0.54	0.150247	0.95834	3.4	8.1	0.54	0.186139	0.978776	1	137935189	137937346	2158	36.7	1	TEC	RIKEN cDNA D130019J16 gene [Source:MGI Symbol;Acc:MGI:2443523]
ENSMUSG00000104973	A530041M06Rik	11	19.2	0.54	0.127397	0.86393	11	19.2	0.57	0.136853	0.795448	3	104499320	104501607	2288	40.3	-1	sense_intronic	RIKEN cDNA A530041M06 gene [Source:MGI Symbol;Acc:MGI:3026943]
ENSMUSG00000106099	Gm42664	0	6.6	0.54	0.053394	1	0	6.6	0.69	0.0355147	1	3	119743208	119746446	3239	36.28	-1	sense_intronic	predicted gene 42664 [Source:MGI Symbol;Acc:MGI:5662801]
ENSMUSG00000108108	Gm44270	2.5	7.5	0.54	0.136125	1	2.5	7.5	0.48	0.21545	1	6	146762581	146763814	1234	40.84	1	TEC	predicted gene, 44270 [Source:MGI Symbol;Acc:MGI:5690662]
ENSMUSG00000109706	Fth-ps3	10.8	18.3	0.54	0.126126	0.862531	10.8	18.3	0.5	0.192754	0.868782	8	86915157	86915514	358	49.44	1	processed_pseudogene	ferritin heavy chain, pseudogene 3 [Source:MGI Symbol;Acc:MGI:104623]
ENSMUSG00000110177	Gm6524	4.9	10.1	0.54	0.151148	1	4.9	10.1	0.58	0.155258	0.962334	8	11693042	11694484	1443	44.7	-1	processed_pseudogene	predicted gene 6524 [Source:MGI Symbol;Acc:MGI:3648756]
ENSMUSG00000110768	Gm18541	18.8	34.1	0.54	0.139421	0.789424	18.8	34.1	0.56	0.147613	0.850009	9	63898265	63898802	538	41.45	1	processed_pseudogene	predicted gene, 18541 [Source:MGI Symbol;Acc:MGI:5010726]
ENSMUSG00000000028	Cdc45	14.9	30.7	0.53	0.160492	0.852975	14.9	30.7	0.54	0.188812	0.890853	16	18780447	18811987	2252	46.23	-1	protein_coding	Cell division control [Source:UniProtKB/Swiss-Prot;Acc:Q9Z1X9]
ENSMUSG00000002679	Med6	74.3	121.5	0.53	0.112117	0.745488	74.3	121.5	0.49	0.147155	0.790956	12	81573557	81595008	1447	40.58	-1	protein_coding	Mus musculus mediator complex subunit 6 (Med6), transcript variant 1, mRNA. [Source:RefSeq mRNA;Acc:NM_001347384]
ENSMUSG00000005262	Ufd1	161.7	248.6	0.53	0.0434021	0.537905	161.7	248.6	0.59	0.0298492	0.471341	16	18811779	18835261	4336	45.1	1	protein_coding	ubiquitin recognition factor in ER-associated degradation 1 [Source:MGI Symbol;Acc:MGI:109353]
ENSMUSG00000006736	Tspan31	43.9	83.7	0.53	0.160038	0.810924	43.9	83.7	0.61	0.119938	0.751645	10	127067280	127070264	2193	49.31	-1	protein_coding	Tetraspanin-31 [Source:UniProtKB/Swiss-Prot;Acc:Q9CQ88]
ENSMUSG00000008167	Fbxw9	42.3	69.1	0.53	0.103539	0.795231	42.3	69.1	0.54	0.117978	0.757228	8	85060055	85067124	3383	51.33	1	protein_coding	F-box and WD repeat domain containing 9 [Source:HGNC Symbol;Acc:HGNC:28136]
ENSMUSG00000016637	Ift27	40.1	66.3	0.53	0.103816	0.728619	40.1	66.3	0.64	0.0587576	0.610801	15	78159463	78174107	2864	54.03	-1	protein_coding	Intraflagellar transport [Source:UniProtKB/Swiss-Prot;Acc:Q9D0P8]
ENSMUSG00000017550	Atad5	47.9	78.9	0.53	0.110658	0.740392	47.9	78.9	0.53	0.142127	0.777572	11	80089400	80135794	7532	39.98	1	protein_coding	ATPase family AAA domain-containing protein 5 [Source:UniProtKB/Swiss-Prot;Acc:Q4QY64]
ENSMUSG00000018398	Sept8	53.8	85.6	0.53	0.0833774	0.688863	53.8	85.6	0.52	0.116811	0.747105	11	53519257	53549565	6087	52.09	1	protein_coding	Mus musculus septin 8 (Sept8), transcript variant 4, mRNA. [Source:RefSeq mRNA;Acc:NM_001347496]
ENSMUSG00000020801	Med31	64	100.8	0.53	0.0727973	0.660746	64	100.8	0.66	0.0294913	0.46543	11	72211724	72215592	1730	44.2	-1	protein_coding	Mediator of RNA polymerase II transcription subunit 31 [Source:UniProtKB/Swiss-Prot;Acc:Q9CXU1]
ENSMUSG00000020872	Tac4	2.8	15.3	0.53	0.103844	0.831815	2.8	15.3	0.73	0.0555993	0.804396	11	95261529	95269265	1251	50.41	1	protein_coding	Tachykinin-4 Hemokinin [Source:UniProtKB/Swiss-Prot;Acc:Q99N14]
ENSMUSG00000021116	Eif2s1	360.6	543.5	0.53	0.0149704	0.34006	360.6	543.5	0.56	0.0166071	0.355724	12	78861819	78887010	4951	38.78	1	protein_coding	Eukaryotic translation initiation factor 2 subunit 1 [Source:UniProtKB/Swiss-Prot;Acc:Q6ZWX6]
ENSMUSG00000022313	Utp23	34.2	53.9	0.53	0.0665786	0.642003	34.2	53.9	0.52	0.106268	0.724916	15	51877429	51884614	2992	43.43	1	protein_coding	UTP23 small subunit processome component [Source:MGI Symbol;Acc:MGI:1925831]
ENSMUSG00000024926	Kat5	8	20	0.53	0.158973	0.902648	8	20	0.69	0.0911131	0.890853	19	5603017	5610094	2008	54.01	-1	protein_coding	Histone acetyltransferase KAT5 [Source:UniProtKB/Swiss-Prot;Acc:Q8CHK4]
ENSMUSG00000024927	Rela	80.9	121.2	0.53	0.0180758	0.374239	80.9	121.2	0.53	0.0354495	0.496216	19	5637483	5648130	2716	53.18	1	protein_coding	v-rel reticuloendotheliosis viral oncogene homolog A (avian) [Source:MGI Symbol;Acc:MGI:103290]
ENSMUSG00000026639	Lamb3	29.9	54	0.53	0.146513	0.7989	29.9	54	0.66	0.07108	0.649455	1	193207699	193343878	6612	46.5	1	protein_coding	Laminin subunit beta-3 [Source:UniProtKB/Swiss-Prot;Acc:Q61087]
ENSMUSG00000026942	Traf2	26.2	41.8	0.53	0.0893014	0.79882	26.2	41.8	0.58	0.0829743	0.706174	2	25517982	25546940	5101	48.93	-1	protein_coding	TNF receptor-associated factor 2 [Source:MGI Symbol;Acc:MGI:101835]
ENSMUSG00000027239	Mdk	19	35.4	0.53	0.156052	0.908638	19	35.4	0.49	0.214326	0.89762	2	91929805	91932297	1324	57.4	-1	protein_coding	Midkine [Source:UniProtKB/Swiss-Prot;Acc:P12025]
ENSMUSG00000027710	Acad9	23	42.8	0.53	0.155656	0.805832	23	42.8	0.6	0.12295	0.770864	3	36065979	36092853	8192	47.38	1	protein_coding	acyl-Coenzyme A dehydrogenase family, member 9 [Source:MGI Symbol;Acc:MGI:1914272]
ENSMUSG00000028037	Ifi44	21.1	44.3	0.53	0.16234	0.813999	21.1	44.3	0.42	0.283765	0.945141	3	151730922	151749960	6129	38.43	-1	protein_coding	Interferon-induced protein 44 [Source:UniProtKB/Swiss-Prot;Acc:Q8BV66]
ENSMUSG00000029669	Tspan12	309.6	467.9	0.53	0.0340657	0.482999	309.6	467.9	0.48	0.0677346	0.639817	6	21771395	21852515	3311	41.25	-1	protein_coding	Tetraspanin-12 [Source:UniProtKB/Swiss-Prot;Acc:Q8BKT6]
ENSMUSG00000030123	Plxnd1	11.1	21.4	0.53	0.154601	0.889123	11.1	21.4	0.54	0.176731	0.838692	6	115954811	115995005	7301	56.12	-1	protein_coding	plexin D1 [Source:MGI Symbol;Acc:MGI:2154244]
ENSMUSG00000030291	Med21	153.1	232	0.53	0.0292033	0.45969	153.1	232	0.5	0.0574693	0.601081	6	146642547	146650732	3523	41.17	1	protein_coding	Mediator of RNA polymerase II transcription subunit 21 [Source:UniProtKB/Swiss-Prot;Acc:Q9CQ39]
ENSMUSG00000031365	Zfp275	45.3	69.1	0.53	0.0451693	0.54506	45.3	69.1	0.43	0.124429	0.771865	X	73342621	73359080	6745	43.51	1	protein_coding	zinc finger protein 275 [Source:MGI Symbol;Acc:MGI:1350985]
ENSMUSG00000031539	Ap3m2	7.2	20.7	0.53	0.14266	0.902648	7.2	20.7	0.6	0.132887	0.954601	8	22787354	22805622	4525	47.24	-1	protein_coding	AP-3 complex subunit mu-2 [Source:UniProtKB/Swiss-Prot;Acc:Q8R2R9]
ENSMUSG00000031558	Slit2	33.6	54.9	0.53	0.0896762	0.69961	33.6	54.9	0.56	0.103225	0.730776	5	47983138	48307733	25433	37.32	1	protein_coding	slit guidance ligand 2 [Source:MGI Symbol;Acc:MGI:1315205]
ENSMUSG00000032060	Cryab	0	6.4	0.53	0.0553081	1	0	6.4	0.54	0.0732246	1	9	50751325	50756636	1479	50.34	1	protein_coding	Alpha-crystallin B chain [Source:UniProtKB/Swiss-Prot;Acc:P23927]
ENSMUSG00000033014	Trim33	171.6	256.3	0.53	0.00608749	0.217162	171.6	256.3	0.58	0.00542395	0.202221	3	103279293	103358775	9805	37.94	1	protein_coding	tripartite motif containing 33 [Source:HGNC Symbol;Acc:HGNC:16290]
ENSMUSG00000034906	Ncaph	55.1	89.2	0.53	0.103557	0.728619	55.1	89.2	0.49	0.149252	0.808197	2	127103809	127133954	4307	47.42	-1	protein_coding	non-SMC condensin I complex, subunit H [Source:MGI Symbol;Acc:MGI:2444777]
ENSMUSG00000035129	Gm6781	16.8	30.7	0.53	0.148806	0.889123	16.8	30.7	0.56	0.157556	0.808197	14	18531363	18532604	1242	49.68	1	processed_pseudogene	predicted gene 6781 [Source:MGI Symbol;Acc:MGI:3644510]
ENSMUSG00000035842	Ddx11	28.7	45.5	0.53	0.0809778	0.79882	28.7	45.5	0.56	0.0947357	0.751645	17	66123520	66152174	6627	48.1	1	protein_coding	Mus musculus DEAD/H (Asp-Glu-Ala-Asp/His) box helicase 11 (Ddx11), transcript variant 2, mRNA. [Source:RefSeq mRNA;Acc:NM_001348292]
ENSMUSG00000035845	Alg12	15.5	27.9	0.53	0.141736	0.875564	15.5	27.9	0.55	0.160971	0.821198	15	88805244	88819318	2356	49.37	-1	protein_coding	Dol-P-Man:Man(7)GlcNAc(2)-PP-Dol alpha-1,6-mannosyltransferase [Source:UniProtKB/Swiss-Prot;Acc:Q8VDB2]
ENSMUSG00000036502	Tmem255a	0.4	6.8	0.53	0.0709714	1	0.4	6.8	0.61	0.0728795	1	X	38196573	38252439	4490	42.18	-1	protein_coding	Transmembrane protein 255A [Source:UniProtKB/Swiss-Prot;Acc:Q8BHW5]
ENSMUSG00000039835	Nhsl1	308.1	469.4	0.53	0.0364723	0.49752	308.1	469.4	0.53	0.050363	0.562248	10	18318985	18533892	11348	44.07	1	protein_coding	NHS-like protein 1 [Source:UniProtKB/Swiss-Prot;Acc:Q8CAF4]
ENSMUSG00000041617	Ccdc74a	2.4	6.5	0.53	0.147527	1	2.4	6.5	0.54	0.168856	1	16	17646470	17650738	2289	56.83	1	protein_coding	coiled-coil domain containing 74A [Source:MGI Symbol;Acc:MGI:1919565]
ENSMUSG00000044469	Tnfaip8l1	74.1	112.5	0.53	0.0323504	0.471924	74.1	112.5	0.48	0.0734307	0.658279	17	56162477	56173955	2379	52.08	1	protein_coding	Tumor necrosis factor alpha-induced protein 8-like protein 1 [Source:UniProtKB/Swiss-Prot;Acc:Q8K288]
ENSMUSG00000047084	Ngrn	110.2	177.9	0.53	0.0910528	0.700862	110.2	177.9	0.58	0.0698975	0.645752	7	80261215	80265374	1714	47.21	1	protein_coding	Neugrin [Source:UniProtKB/Swiss-Prot;Acc:Q99KS2]
ENSMUSG00000047242	Taf9b	32.5	59.2	0.53	0.145886	0.858942	32.5	59.2	0.66	0.0743667	0.661884	X	106206883	106221158	3158	42.54	-1	protein_coding	Transcription initiation factor TFIID subunit 9B [Source:UniProtKB/Swiss-Prot;Acc:Q6NZA9]
ENSMUSG00000048439	Nupl2	24.6	39.4	0.53	0.0871277	0.699341	24.6	39.4	0.55	0.106174	0.747105	5	24164963	24184013	3768	42.38	1	protein_coding	nucleoporin like 2 [Source:HGNC Symbol;Acc:HGNC:17010]
ENSMUSG00000049477	Gm8508	1.2	5.7	0.53	0.1095	1	1.2	5.7	0.53	0.140889	1	5	109757525	109757887	363	45.18	-1	processed_pseudogene	predicted gene 8508 [Source:MGI Symbol;Acc:MGI:3643536]
ENSMUSG00000050092	Sprr2b	0.3	6.9	0.53	0.0673409	1	0.3	6.9	0.67	0.0482754	1	3	92316620	92318085	784	46.38	1	protein_coding	small proline-rich protein 2B [Source:MGI Symbol;Acc:MGI:1330352]
ENSMUSG00000053862	Slc51b	2.1	8.3	0.53	0.119291	1	2.1	8.3	0.57	0.127558	1	9	65412714	65422955	709	46.56	-1	protein_coding	solute carrier family 51, beta subunit [Source:MGI Symbol;Acc:MGI:3582052]
ENSMUSG00000054717	Hmgb2	226.3	348.9	0.53	0.0495187	0.577058	226.3	348.9	0.48	0.0872447	0.689905	8	57511907	57515999	3003	45.32	1	protein_coding	High mobility group protein B2 [Source:UniProtKB/Swiss-Prot;Acc:P30681]
ENSMUSG00000056820	Tsnax	151	230.5	0.53	0.0253607	0.425671	151	230.5	0.59	0.0183922	0.376596	8	125012997	125034192	3917	47.54	1	protein_coding	Translin-associated protein X [Source:UniProtKB/Swiss-Prot;Acc:Q9QZE7]
ENSMUSG00000058922	Gm10052	12.8	21.8	0.53	0.13115	0.878535	12.8	21.8	0.6	0.110694	0.766052	9	123689233	123690192	960	48.44	-1	processed_pseudogene	predicted pseudogene 10052 [Source:MGI Symbol;Acc:MGI:3704348]
ENSMUSG00000059713	Rcan3	86.4	132	0.53	0.0387172	0.50995	86.4	132	0.53	0.0585351	0.621622	4	135412308	135433853	5111	48.14	-1	protein_coding	Calcipressin-3 [Source:UniProtKB/Swiss-Prot;Acc:Q9JKK0]
ENSMUSG00000061458	Nol10	33.7	57.7	0.53	0.131472	0.774801	33.7	57.7	0.59	0.108461	0.730776	12	17348458	17430095	3021	43.65	1	protein_coding	Nucleolar protein 10 [Source:UniProtKB/Swiss-Prot;Acc:Q5RJG1]
ENSMUSG00000066551	Hmgb1	102.1	161.9	0.53	0.0895154	0.700862	102.1	161.9	0.47	0.154598	0.803635	5	149046702	149184489	5023	45.87	-1	protein_coding	High mobility group protein B1 [Source:UniProtKB/Swiss-Prot;Acc:P63158]
ENSMUSG00000070471	Erich6	0.2	6.8	0.53	0.0624965	1	0.2	6.8	0.58	0.0682997	1	3	58616300	58637207	2195	42.66	-1	protein_coding	Glutamate-rich protein 6 [Source:UniProtKB/Swiss-Prot;Acc:D3Z6S9]
ENSMUSG00000072494	Ppp1r3e	12.4	23.9	0.53	0.160795	0.894065	12.4	23.9	0.55	0.170284	0.87318	14	54872669	54877550	2508	53.71	-1	protein_coding	protein phosphatase 1, regulatory (inhibitor) subunit 3E [Source:MGI Symbol;Acc:MGI:2145790]
ENSMUSG00000073415	Gm10501	3.1	8.8	0.53	0.15111	0.960419	3.1	8.8	0.61	0.132948	0.940426	17	34976899	34981788	2200	47.46	-1	antisense	predicted gene 10501 [Source:MGI Symbol;Acc:MGI:3704476]
ENSMUSG00000074121	Ntf5	2.5	9	0.53	0.133775	0.947569	2.5	9	0.56	0.14542	0.964233	7	45413695	45417179	2653	57.65	1	protein_coding	Neurotrophin-4 [Source:UniProtKB/Swiss-Prot;Acc:Q80VU4]
ENSMUSG00000075232	Amd1	46.1	74.6	0.53	0.0982628	0.716298	46.1	74.6	0.56	0.101738	0.727365	10	40287458	40302186	3542	44.73	-1	protein_coding	S-adenosylmethionine decarboxylase proenzyme 1 S-adenosylmethionine decarboxylase 1 alpha chain S-adenosylmethionine decarboxylase 1 beta chain [Source:UniProtKB/Swiss-Prot;Acc:P0DMN7]
ENSMUSG00000081058	Hist2h3c2	1.9	5.7	0.53	0.138037	1	1.9	5.7	0.49	0.199749	1	3	96238108	96239127	1020	60.2	-1	protein_coding	Histone H3.2 [Source:UniProtKB/Swiss-Prot;Acc:P84228]
ENSMUSG00000081373	Gm16436	0.7	3.7	0.53	0.108522	1	0.7	3.7	0.5	0.156696	1	X	58630187	58632738	1607	45.69	-1	processed_pseudogene	predicted gene 16436 [Source:MGI Symbol;Acc:MGI:3645326]
ENSMUSG00000082588	Gm15443	8.5	17	0.53	0.157726	0.895599	8.5	17	0.53	0.197051	0.988454	1	149025228	149026047	820	36.95	-1	processed_pseudogene	predicted gene 15443 [Source:MGI Symbol;Acc:MGI:3642525]
ENSMUSG00000092103	Gm17039	0	4.4	0.53	0.0558664	1	0	4.4	0.5	0.0904245	1	13	67360671	67365679	4901	39.59	1	antisense	predicted gene 17039 [Source:MGI Symbol;Acc:MGI:4937866]
ENSMUSG00000097062	Gm17586	5.1	12.4	0.53	0.157325	0.963945	5.1	12.4	0.5	0.211352	0.988454	11	120633768	120635125	908	49.26	1	lincRNA	predicted gene, 17586 [Source:MGI Symbol;Acc:MGI:4937220]
ENSMUSG00000097360	9430065F17Rik	7.2	13.8	0.53	0.151023	0.912322	7.2	13.8	0.56	0.162263	0.971515	13	67553035	67564010	2571	41.14	1	antisense	RIKEN cDNA 9430065F17 gene [Source:MGI Symbol;Acc:MGI:1924606]
ENSMUSG00000101188	Eif4a-ps4	102.5	156.1	0.53	0.031277	0.468428	102.5	156.1	0.48	0.0718583	0.658279	1	60703932	60705149	1218	48.6	1	processed_pseudogene	eukaryotic translation initiation factor 4A, pseudogene 4 [Source:MGI Symbol;Acc:MGI:1195958]
ENSMUSG00000103382	Gm37755	1.7	7.2	0.53	0.118729	1	1.7	7.2	0.53	0.147161	1	1	66812315	66814493	2179	33.55	1	TEC	predicted gene, 37755 [Source:MGI Symbol;Acc:MGI:5610983]
ENSMUSG00000103711	Tstd1	68.5	102.6	0.53	0.0117312	0.298426	68.5	102.6	0.55	0.0221404	0.410863	1	171418872	171420352	867	53.81	1	protein_coding	thiosulfate sulfurtransferase like domain containing 1 [Source:HGNC Symbol;Acc:HGNC:35410]
ENSMUSG00000110331	Nudc-ps1	44.5	72.7	0.53	0.0988693	0.717308	44.5	72.7	0.6	0.078648	0.681817	8	29286431	29286981	551	53.18	-1	processed_pseudogene	nuclear distribution gene C homolog (Aspergillus), pseudogene 1 [Source:MGI Symbol;Acc:MGI:2142657]
ENSMUSG00000112046	Gm5175	5.6	10.4	0.53	0.154644	0.972264	5.6	10.4	0.49	0.228785	0.988454	10	102819320	102838659	1913	39.12	1	transcribed_processed_pseudogene	predicted gene 5175 [Source:MGI Symbol;Acc:MGI:3647142]
ENSMUSG00000116475	AC110211.2	0.8	4.3	0.53	0.106864	1	0.8	4.3	0.51	0.143868	1	15	76150368	76150607	240	44.17	1	processed_pseudogene
ENSMUSG00000003228	Grk5	6.9	14	0.52	0.16835	0.9384	6.9	14	0.43	0.290551	1	19	60889749	61092553	3165	43.59	1	protein_coding	G protein-coupled receptor kinase 5 [Source:UniProtKB/Swiss-Prot;Acc:Q8VEB1]
ENSMUSG00000003549	Ercc1	21.7	36.1	0.52	0.134816	0.789098	21.7	36.1	0.54	0.151628	0.857099	7	19344778	19356524	3111	52.67	1	protein_coding	DNA excision repair protein ERCC-1 [Source:UniProtKB/Swiss-Prot;Acc:P07903]
ENSMUSG00000006728	Cdk4	350.3	516.4	0.52	0.00507195	0.196857	350.3	516.4	0.57	0.0054744	0.205518	10	127063534	127067920	3249	51.65	1	protein_coding	Cyclin-dependent kinase 4 [Source:UniProtKB/Swiss-Prot;Acc:P30285]
ENSMUSG00000008398	Elk3	20.7	33.3	0.52	0.103742	0.728619	20.7	33.3	0.5	0.158424	0.818677	10	93247414	93311135	4550	47.61	-1	protein_coding	ETS domain-containing protein Elk-3 [Source:UniProtKB/Swiss-Prot;Acc:P41971]
ENSMUSG00000009035	Tmem184b	65.3	105.1	0.52	0.103795	0.728619	65.3	105.1	0.52	0.128213	0.777111	15	79360684	79403569	4702	53.19	-1	protein_coding	Transmembrane protein 184B [Source:UniProtKB/Swiss-Prot;Acc:Q8BG09]
ENSMUSG00000020305	Asb3	52.2	97.9	0.52	0.16502	0.826127	52.2	97.9	0.61	0.119227	0.777572	11	30885416	31102704	5406	39.42	1	protein_coding	Ankyrin repeat and SOCS box protein 3 [Source:UniProtKB/Swiss-Prot;Acc:Q9WV72]
ENSMUSG00000021280	Exoc3l4	16.9	31	0.52	0.153689	0.894911	16.9	31	0.62	0.111766	0.757228	12	111417017	111431678	5650	55.1	1	protein_coding	exocyst complex component 3 like 4 [Source:HGNC Symbol;Acc:HGNC:20120]
ENSMUSG00000022329	Stk3	153.7	242.8	0.52	0.0817003	0.683312	153.7	242.8	0.54	0.0946213	0.694863	15	34875496	35178921	6114	39.58	-1	protein_coding	Mus musculus serine/threonine kinase 3 (Stk3), transcript variant 2, mRNA. [Source:RefSeq mRNA;Acc:NM_001357821]
ENSMUSG00000022833	Ccdc14	11.4	19.6	0.52	0.146609	0.889123	11.4	19.6	0.41	0.28693	0.936545	16	34690616	34725194	4107	40.78	1	protein_coding	Coiled-coil domain-containing protein 14 [Source:UniProtKB/Swiss-Prot;Acc:Q8K2J4]
ENSMUSG00000023827	Agpat4	32.9	57.2	0.52	0.139807	0.789424	32.9	57.2	0.69	0.0366725	0.52086	17	12118704	12219645	2701	47.1	1	protein_coding	1-acyl-sn-glycerol-3-phosphate acyltransferase delta [Source:UniProtKB/Swiss-Prot;Acc:Q8K4X7]
ENSMUSG00000024078	Ttc27	29	48.3	0.52	0.117222	0.751281	29	48.3	0.63	0.0684933	0.658279	17	74717750	74863570	2820	42.54	1	protein_coding	tetratricopeptide repeat domain 27 [Source:MGI Symbol;Acc:MGI:1921446]
ENSMUSG00000025577	Cbx2	19.5	35.1	0.52	0.160815	0.868437	19.5	35.1	0.55	0.163273	0.838692	11	119022962	119031270	4257	57.11	1	protein_coding	Chromobox protein homolog 2 [Source:UniProtKB/Swiss-Prot;Acc:P30658]
ENSMUSG00000026944	Abca2	14.9	29.9	0.52	0.173003	0.912322	14.9	29.9	0.54	0.183929	0.846916	2	25428703	25448540	8346	57.99	1	protein_coding	ATP-binding cassette, sub-family A (ABC1), member 2 [Source:MGI Symbol;Acc:MGI:99606]
ENSMUSG00000027641	Rbl1	77.8	123.6	0.52	0.0927644	0.704572	77.8	123.6	0.46	0.151911	0.792786	2	157145893	157204534	5993	42.59	-1	protein_coding	Retinoblastoma-like protein 1 [Source:UniProtKB/Swiss-Prot;Acc:Q64701]
ENSMUSG00000028514	Usp24	173.8	265.6	0.52	0.0421976	0.531352	173.8	265.6	0.62	0.0141605	0.334074	4	106316213	106441322	12350	41.57	1	protein_coding	ubiquitin specific peptidase 24 [Source:MGI Symbol;Acc:MGI:1919936]
ENSMUSG00000029027	Dffb	23.1	46.3	0.52	0.167512	0.829338	23.1	46.3	0.55	0.177151	0.838692	4	153964449	153975126	2875	52.03	-1	protein_coding	DNA fragmentation factor subunit beta [Source:UniProtKB/Swiss-Prot;Acc:O54788]
ENSMUSG00000029055	Plch2	35	57.3	0.52	0.107838	0.740392	35	57.3	0.62	0.0592244	0.624533	4	154983115	155056784	8112	54.74	-1	protein_coding	1-phosphatidylinositol 4,5-bisphosphate phosphodiesterase eta-2 [Source:UniProtKB/Swiss-Prot;Acc:A2AP18]
ENSMUSG00000029384	2010109A12Rik	3.5	11.9	0.52	0.137102	1	3.5	11.9	0.51	0.181535	0.985097	5	93206518	93213475	1275	41.92	1	protein_coding	RIKEN cDNA 2010109A12 gene [Source:MGI Symbol;Acc:MGI:1922860]
ENSMUSG00000029385	Ccng2	56.1	102.2	0.52	0.159831	0.810924	56.1	102.2	0.51	0.194328	0.839024	5	93267257	93276231	5458	44.23	1	protein_coding	Cyclin-G2 [Source:UniProtKB/Swiss-Prot;Acc:O08918]
ENSMUSG00000029761	Cald1	8.2	20.5	0.52	0.160381	0.919903	8.2	20.5	0.46	0.260182	0.998186	6	34598500	34775473	12041	42.95	1	protein_coding	caldesmon 1 [Source:MGI Symbol;Acc:MGI:88250]
ENSMUSG00000029781	Fkbp9	68.3	112.2	0.52	0.123483	0.760574	68.3	112.2	0.54	0.124274	0.771865	6	56832059	56879358	3314	44.16	1	protein_coding	Peptidyl-prolyl cis-trans isomerase FKBP9 [Source:UniProtKB/Swiss-Prot;Acc:Q9Z247]
ENSMUSG00000030930	Chst15	21.8	35.1	0.52	0.117098	0.751281	21.8	35.1	0.55	0.120402	0.780838	7	132235780	132317228	6754	48.33	-1	protein_coding	Carbohydrate sulfotransferase 15 [Source:UniProtKB/Swiss-Prot;Acc:Q91XQ5]
ENSMUSG00000031075	Ano1	19.6	31.4	0.52	0.103976	0.843544	19.6	31.4	0.61	0.0676901	0.681409	7	144588549	144751974	6244	49.65	-1	protein_coding	Anoctamin-1 [Source:UniProtKB/Swiss-Prot;Acc:Q8BHY3]
ENSMUSG00000032017	Grik4	8.6	16.6	0.52	0.167911	0.912322	8.6	16.6	0.57	0.159419	0.971742	9	42518135	42944493	5962	48.03	-1	protein_coding	Glutamate receptor ionotropic, kainate 4 [Source:UniProtKB/Swiss-Prot;Acc:Q8BMF5]
ENSMUSG00000032348	Gsta4	28.1	105.8	0.52	0.127744	0.767041	28.1	105.8	0.52	0.165098	0.826806	9	78182774	78209349	1266	44.09	1	protein_coding	Glutathione S-transferase A4 [Source:UniProtKB/Swiss-Prot;Acc:P24472]
ENSMUSG00000033222	Ttf2	31.9	52.4	0.52	0.126992	0.772646	31.9	52.4	0.5	0.176614	0.828214	3	100938860	100969663	7672	45.28	-1	protein_coding	transcription termination factor, RNA polymerase II [Source:MGI Symbol;Acc:MGI:1921294]
ENSMUSG00000034774	Dsg1c	0.7	4.4	0.52	0.102456	1	0.7	4.4	0.58	0.0988944	1	18	20247340	20285031	4088	38.1	1	protein_coding	Desmoglein-1-gamma [Source:UniProtKB/Swiss-Prot;Acc:Q7TSF0]
ENSMUSG00000035020	Epgn	0.5	5	0.52	0.0836463	1	0.5	5	0.53	0.106054	1	5	91027464	91035215	1807	40.57	1	protein_coding	Epigen [Source:UniProtKB/Swiss-Prot;Acc:Q924X1]
ENSMUSG00000035151	Elmod2	64.2	98.7	0.52	0.0431393	0.537588	64.2	98.7	0.57	0.0403019	0.541534	8	83312632	83332486	11138	42.06	-1	protein_coding	ELMO domain-containing protein 2 [Source:UniProtKB/Swiss-Prot;Acc:Q8BGF6]
ENSMUSG00000037621	Atoh8	17.2	36.4	0.52	0.167012	0.875626	17.2	36.4	0.61	0.137273	0.835856	6	72206177	72235577	2507	52.92	-1	protein_coding	8 [Source:UniProtKB/Swiss-Prot;Acc:Q99NA2]
ENSMUSG00000038909	Kat7	107.4	160.4	0.52	0.0315942	0.468953	107.4	160.4	0.47	0.0715204	0.664263	11	95274259	95310246	5536	43.52	-1	protein_coding	K(lysine) acetyltransferase 7 [Source:MGI Symbol;Acc:MGI:2182799]
ENSMUSG00000039233	Tbce	68.2	107.7	0.52	0.0862674	0.691722	68.2	107.7	0.55	0.0811169	0.677704	13	13997949	14039638	4540	43.03	-1	protein_coding	Tubulin-specific chaperone E [Source:UniProtKB/Swiss-Prot;Acc:Q8CIV8]
ENSMUSG00000039330	Tsga10ip	16.4	30.2	0.52	0.154597	0.89696	16.4	30.2	0.57	0.137828	0.783687	19	5390049	5394401	487	50.65	-1	protein_coding
ENSMUSG00000039456	Morc3	104.5	154	0.52	0.0101991	0.277482	104.5	154	0.5	0.0308575	0.465832	16	93832121	93876072	5331	43.48	1	protein_coding	MORC family CW-type zinc finger protein 3 [Source:UniProtKB/Swiss-Prot;Acc:F7BJB9]
ENSMUSG00000039646	Vasn	12.7	22	0.52	0.150147	0.885544	12.7	22	0.53	0.174599	0.879133	16	4639941	4650802	3007	54.8	1	protein_coding	vasorin [Source:MGI Symbol;Acc:MGI:2177651]
ENSMUSG00000040584	Abcb1a	128.1	199.2	0.52	0.0762153	0.671728	128.1	199.2	0.73	0.00499736	0.192821	5	8660077	8748575	5480	39.91	1	protein_coding	Multidrug resistance protein 1A [Source:UniProtKB/Swiss-Prot;Acc:P21447]
ENSMUSG00000041440	Gk5	88.5	137.2	0.52	0.0699661	0.65146	88.5	137.2	0.61	0.0284399	0.46543	9	96119362	96184608	8493	44.29	1	protein_coding	Putative glycerol kinase 5 [Source:UniProtKB/Swiss-Prot;Acc:Q8BX05]
ENSMUSG00000042496	Prdm10	45.7	76.9	0.52	0.126849	0.765854	45.7	76.9	0.7	0.0378336	0.526852	9	31280538	31381723	9259	44.17	1	protein_coding	PR domain zinc finger protein 10 [Source:UniProtKB/Swiss-Prot;Acc:Q3UTQ7]
ENSMUSG00000049532	Sall2	3.8	12.6	0.52	0.136503	1	3.8	12.6	0.48	0.214773	0.988454	14	52311172	52328762	5433	47.86	-1	protein_coding	Sal-like protein 2 [Source:UniProtKB/Swiss-Prot;Acc:Q9QX96]
ENSMUSG00000049871	Nlrc3	0.9	5.1	0.52	0.100947	1	0.9	5.1	0.55	0.118373	1	16	3945007	3976632	7069	47.22	-1	protein_coding	Protein NLRC3 [Source:UniProtKB/Swiss-Prot;Acc:Q5DU56]
ENSMUSG00000050945	Zfp438	7.3	17	0.52	0.165961	0.906193	7.3	17	0.54	0.179524	0.978776	18	5210031	5334439	3209	39.83	-1	protein_coding	zinc finger protein 438 [Source:MGI Symbol;Acc:MGI:2444919]
ENSMUSG00000051234	Rnf7	178.9	263.3	0.52	0.00632437	0.219844	178.9	263.3	0.49	0.0210638	0.397989	9	96470937	96478675	1328	44.73	-1	protein_coding	RING-box protein 2 [Source:UniProtKB/Swiss-Prot;Acc:Q9WTZ1]
ENSMUSG00000056019	Zfp709	14.9	25.6	0.52	0.135873	0.867156	14.9	25.6	0.69	0.0520024	0.62383	8	71882019	71895727	7954	39.94	1	protein_coding	zinc finger protein 709 [Source:MGI Symbol;Acc:MGI:2384299]
ENSMUSG00000063894	Zkscan8	52.3	78.4	0.52	0.0346478	0.48674	52.3	78.4	0.45	0.0948462	0.723427	13	21513222	21531120	8902	39.47	-1	protein_coding	zinc finger with KRAB and SCAN domains 8 [Source:MGI Symbol;Acc:MGI:1913815]
ENSMUSG00000080242	Gm15487	21.6	39.8	0.52	0.162818	0.82254	21.6	39.8	0.68	0.0707564	0.689905	6	37806086	37806550	465	57.2	1	processed_pseudogene
ENSMUSG00000081121	Gm12791	2.8	7.6	0.52	0.155392	1	2.8	7.6	0.52	0.189553	1	4	101875347	101876001	655	50.38	1	processed_pseudogene	predicted gene 12791 [Source:MGI Symbol;Acc:MGI:3649397]
ENSMUSG00000081270	Gm11653	3	7.7	0.52	0.16551	1	3	7.7	0.52	0.195462	1	11	105875905	105876913	1009	44.2	1	processed_pseudogene	predicted gene 11653 [Source:MGI Symbol;Acc:MGI:3651873]
ENSMUSG00000083912	Gm5391	43.8	66.9	0.52	0.0632866	0.632143	43.8	66.9	0.52	0.0947986	0.708491	X	68319638	68320250	613	47.8	-1	processed_pseudogene	predicted gene 5391 [Source:MGI Symbol;Acc:MGI:3647141]
ENSMUSG00000083951	Gm13786	0.3	3.9	0.52	0.0749702	1	0.3	3.9	0.51	0.10971	1	2	92233105	92233437	333	44.74	1	processed_pseudogene	predicted gene 13786 [Source:MGI Symbol;Acc:MGI:3649782]
ENSMUSG00000093105	Gm25535	0.5	3.1	0.52	0.0987415	1	0.5	3.1	0.5	0.140833	1	6	117935469	117935593	125	57.6	-1	miRNA	predicted gene, 25535 [Source:MGI Symbol;Acc:MGI:5455312]
ENSMUSG00000097000	Gm17435	10.9	22.6	0.52	0.173779	0.922462	10.9	22.6	0.56	0.173293	0.850498	8	72492934	72505499	4885	50.45	1	antisense	predicted gene, 17435 [Source:MGI Symbol;Acc:MGI:4937069]
ENSMUSG00000097296	Gm26532	8.9	16.1	0.52	0.163912	0.902648	8.9	16.1	0.51	0.198909	0.98668	8	84208920	84209609	690	51.74	1	lincRNA	predicted gene, 26532 [Source:MGI Symbol;Acc:MGI:5477026]
ENSMUSG00000101166	Gm28496	1.9	6.1	0.52	0.143531	1	1.9	6.1	0.52	0.172006	1	7	44246726	44262720	2991	51.64	1	processed_transcript	predicted gene 28496 [Source:MGI Symbol;Acc:MGI:5579202]
ENSMUSG00000103343	Gm37052	4.5	13.6	0.52	0.147497	0.88903	4.5	13.6	0.69	0.0900091	0.876466	1	160910789	160912619	1831	38.83	1	TEC	predicted gene, 37052 [Source:MGI Symbol;Acc:MGI:5610280]
ENSMUSG00000105519	E430021H15Rik	18.4	30.3	0.52	0.124612	0.767041	18.4	30.3	0.47	0.197365	0.898368	5	44213801	44217259	3459	42.82	-1	TEC	RIKEN cDNA E430021H15 gene [Source:MGI Symbol;Acc:MGI:2444377]
ENSMUSG00000107066	Gm4482	0.9	6.3	0.52	0.100338	1	0.9	6.3	0.66	0.0708707	1	6	122792584	122793325	742	54.31	-1	processed_pseudogene	predicted gene 4482 [Source:MGI Symbol;Acc:MGI:3782666]
ENSMUSG00000107770	Gm44126	2.8	6.3	0.52	0.166371	1	2.8	6.3	0.5	0.220442	1	6	76284416	76284929	514	45.33	1	processed_pseudogene	predicted gene, 44126 [Source:MGI Symbol;Acc:MGI:5690518]
ENSMUSG00000112109	Gm30906	1.2	6.9	0.52	0.111252	1	1.2	6.9	0.63	0.0921423	1	10	8176131	8193340	535	44.28	1	lincRNA	predicted gene, 30906 [Source:MGI Symbol;Acc:MGI:5590065]
ENSMUSG00000112625	Gm2628	5.9	10.6	0.52	0.159247	0.9732	5.9	10.6	0.49	0.218642	1	10	76198194	76198981	426	47.84	-1	processed_pseudogene	predicted gene 2628 [Source:MGI Symbol;Acc:MGI:3780796]
ENSMUSG00000115222	AC174678.1	1.5	5.3	0.52	0.135335	1	1.5	5.3	0.49	0.18912	1	14	55643604	55646352	2749	49.51	1	antisense
ENSMUSG00000004393	Ddx56	79	125.9	0.51	0.106194	0.733705	79	125.9	0.53	0.118164	0.747105	11	6258919	6267772	2533	50.47	-1	protein_coding	Probable ATP-dependent RNA helicase DDX56 [Source:UniProtKB/Swiss-Prot;Acc:Q9D0R4]
ENSMUSG00000005621	Zfp592	69.1	112.7	0.51	0.127767	0.767041	69.1	112.7	0.59	0.0891103	0.694863	7	80993681	81045164	7412	44.7	1	protein_coding	zinc finger protein 592 [Source:MGI Symbol;Acc:MGI:2443541]
ENSMUSG00000015289	Lage3	101.8	153.3	0.51	0.0440348	0.540807	101.8	153.3	0.53	0.0533429	0.600608	X	74351276	74353618	2021	45.97	-1	protein_coding	EKC/KEOPS complex subunit Lage3 [Source:UniProtKB/Swiss-Prot;Acc:Q9CR70]
ENSMUSG00000017195	Zpbp2	0.6	10.7	0.51	0.0740576	0.862531	0.6	10.7	0.58	0.0722189	0.859476	11	98551097	98558665	1683	42.16	1	protein_coding	zona pellucida binding protein 2 [Source:MGI Symbol;Acc:MGI:1916626]
ENSMUSG00000020806	Rhbdf2	27.5	44.3	0.51	0.117997	0.818593	27.5	44.3	0.52	0.138459	0.796155	11	116598165	116627019	5293	54.95	-1	protein_coding	Inactive rhomboid protein 2 [Source:UniProtKB/Swiss-Prot;Acc:Q80WQ6]
ENSMUSG00000021018	Polr2h	100	149.2	0.51	0.0271991	0.438501	100	149.2	0.58	0.0128984	0.336189	16	20717665	20722267	1448	43.97	1	protein_coding	DNA-directed RNA polymerases I, II, and III subunit RPABC3 [Source:UniProtKB/Swiss-Prot;Acc:Q923G2]
ENSMUSG00000021087	Rtn1	7.1	17.5	0.51	0.167957	1	7.1	17.5	0.57	0.158677	0.97132	12	72211752	72409054	4980	43.75	-1	protein_coding	reticulon 1 [Source:MGI Symbol;Acc:MGI:1933947]
ENSMUSG00000021273	Fdft1	138.4	209.3	0.51	0.0468193	0.558364	138.4	209.3	0.5	0.0704636	0.661884	14	63145150	63179578	4227	46.57	-1	protein_coding	Squalene synthase [Source:UniProtKB/Swiss-Prot;Acc:P53798]
ENSMUSG00000022754	Tmem45a	0	5.9	0.51	0.0619964	1	0	5.9	0.52	0.0815704	1	16	56805161	56886166	3056	40.71	-1	protein_coding	transmembrane protein 45a [Source:MGI Symbol;Acc:MGI:1913122]
ENSMUSG00000022838	Eaf2	5.9	12.7	0.51	0.175873	1	5.9	12.7	0.5	0.220585	0.988454	16	36792884	36875003	4370	37.25	-1	protein_coding	ELL-associated factor 2 [Source:UniProtKB/Swiss-Prot;Acc:Q91ZD6]
ENSMUSG00000024542	Cep192	95.6	152.4	0.51	0.116332	0.749177	95.6	152.4	0.55	0.103145	0.723328	18	67800107	67885170	12484	40.81	1	protein_coding	centrosomal protein 192 [Source:MGI Symbol;Acc:MGI:1918049]
ENSMUSG00000025586	Cpeb1	1.6	10.6	0.51	0.105403	0.935446	1.6	10.6	0.68	0.0636614	0.997408	7	81347026	81455465	4192	40.98	-1	protein_coding	Mus musculus cytoplasmic polyadenylation element binding protein 1 (Cpeb1), transcript variant 4, mRNA. [Source:RefSeq mRNA;Acc:NM_001357107]
ENSMUSG00000028066	Pmf1	48.8	77	0.51	0.0848761	0.690647	48.8	77	0.55	0.0861555	0.681817	3	88394143	88410331	4063	49.05	-1	protein_coding	Polyamine-modulated factor 1 [Source:UniProtKB/Swiss-Prot;Acc:Q9CPV5]
ENSMUSG00000028195	Cyr61	67.7	116.3	0.51	0.155354	0.805832	67.7	116.3	0.55	0.150385	0.796008	3	145646976	145649981	2019	50.5	-1	protein_coding	Protein CYR61 [Source:UniProtKB/Swiss-Prot;Acc:P18406]
ENSMUSG00000028927	Padi2	7.4	19.7	0.51	0.165026	0.909162	7.4	19.7	0.57	0.162779	0.969769	4	140906344	140952586	5013	51.66	1	protein_coding	Protein-arginine deiminase type-2 [Source:UniProtKB/Swiss-Prot;Acc:Q08642]
ENSMUSG00000032068	Plet1	0.6	6.1	0.51	0.0865493	1	0.6	6.1	0.58	0.086874	1	9	50494525	50505482	1947	45.75	1	protein_coding	Placenta-expressed transcript 1 protein [Source:UniProtKB/Swiss-Prot;Acc:Q8VEN2]
ENSMUSG00000032309	Fbxo22	64.7	103.8	0.51	0.120802	0.755316	64.7	103.8	0.54	0.117152	0.762755	9	55208925	55224433	2394	44.75	1	protein_coding	F-box only protein 22 [Source:UniProtKB/Swiss-Prot;Acc:Q78JE5]
ENSMUSG00000035704	Alg8	52.2	85.8	0.51	0.125358	0.763996	52.2	85.8	0.54	0.123984	0.771614	7	97371606	97392185	2784	44.11	1	protein_coding	Probable dolichyl pyrophosphate Glc1Man9GlcNAc2 alpha-1,3-glucosyltransferase [Source:UniProtKB/Swiss-Prot;Acc:Q6P8H8]
ENSMUSG00000037966	Ninj1	87.3	140.9	0.51	0.119612	0.759299	87.3	140.9	0.59	0.0772637	0.667391	13	49187485	49196244	1570	55.43	1	protein_coding	ninjurin 1 [Source:MGI Symbol;Acc:MGI:1196617]
ENSMUSG00000038079	Tmem237	32	53.9	0.51	0.153519	0.804477	32	53.9	0.42	0.256381	0.886578	1	59100590	59120408	2389	42.57	-1	protein_coding	Transmembrane protein 237 [Source:UniProtKB/Swiss-Prot;Acc:Q3V0J1]
ENSMUSG00000038371	Sbf2	141.6	211.9	0.51	0.0301174	0.459848	141.6	211.9	0.55	0.0281554	0.463535	7	110308013	110614922	14783	39.07	-1	protein_coding	SET binding factor 2 [Source:HGNC Symbol;Acc:HGNC:2135]
ENSMUSG00000040483	Xaf1	67	106.3	0.51	0.110695	0.740392	67	106.3	0.55	0.109681	0.73761	11	72301629	72313733	4689	47.32	1	protein_coding	XIAP associated factor 1 [Source:MGI Symbol;Acc:MGI:3772572]
ENSMUSG00000041961	Znrf3	149.9	223.6	0.51	0.0451056	0.544996	149.9	223.6	0.41	0.118645	0.765854	11	5276324	5444847	7893	42.56	-1	protein_coding	zinc and ring finger 3 [Source:MGI Symbol;Acc:MGI:3039616]
ENSMUSG00000042548	Asxl1	65.7	100.9	0.51	0.0803856	0.68156	65.7	100.9	0.5	0.119524	0.766434	2	153345829	153404007	7444	42.19	1	protein_coding	Putative Polycomb group protein ASXL1 [Source:UniProtKB/Swiss-Prot;Acc:P59598]
ENSMUSG00000042607	Asb4	40.5	118.7	0.51	0.152599	0.80353	40.5	118.7	0.71	0.0728556	0.667391	6	5383386	5433022	3932	41.68	1	protein_coding	Mus musculus ankyrin repeat and SOCS box-containing 4 (Asb4), transcript variant 2, mRNA. [Source:RefSeq mRNA;Acc:NM_001355662]
ENSMUSG00000043430	Psapl1	0	6.3	0.51	0.0625697	1	0	6.3	0.59	0.0567373	1	5	36204021	36206568	2548	55.1	1	protein_coding	prosaposin-like 1 [Source:MGI Symbol;Acc:MGI:1924193]
ENSMUSG00000047719	Ubiad1	25.9	41.6	0.51	0.10853	0.740392	25.9	41.6	0.53	0.125443	0.818092	4	148434495	148444771	2992	50	-1	protein_coding	UbiA prenyltransferase domain containing 1 [Source:MGI Symbol;Acc:MGI:1918957]
ENSMUSG00000048852	Gm12185	0.7	6.1	0.51	0.094031	1	0.7	6.1	0.58	0.0997716	1	11	48904656	48992226	5587	41.7	-1	protein_coding
ENSMUSG00000053279	Aldh1a1	14.8	33.2	0.51	0.174183	0.912614	14.8	33.2	0.51	0.208954	0.859693	19	20492715	20643462	4934	38.5	1	protein_coding	Retinal dehydrogenase 1 [Source:UniProtKB/Swiss-Prot;Acc:P24549]
ENSMUSG00000057531	Dtnbp1	27.5	43.1	0.51	0.0890972	0.79865	27.5	43.1	0.51	0.122898	0.770864	13	44922075	45002147	3728	43.71	-1	protein_coding	Dysbindin [Source:UniProtKB/Swiss-Prot;Acc:Q91WZ8]
ENSMUSG00000058773	Hist1h1b	84.7	131.4	0.51	0.0954939	0.708384	84.7	131.4	0.4	0.209477	0.850498	13	21779883	21780625	743	55.59	-1	protein_coding	Histone H1.5 [Source:UniProtKB/Swiss-Prot;Acc:P43276]
ENSMUSG00000060777	Gm10087	1.2	4.1	0.51	0.145565	1	1.2	4.1	0.48	0.191552	1	7	110526792	110527121	330	49.7	1	processed_pseudogene	predicted gene 10087 [Source:MGI Symbol;Acc:MGI:3809877]
ENSMUSG00000062995	Ica1	186.4	291.8	0.51	0.0953325	0.708384	186.4	291.8	0.52	0.103623	0.731648	6	8630527	8778488	3243	42.85	-1	protein_coding	Islet cell autoantigen 1 [Source:UniProtKB/Swiss-Prot;Acc:P97411]
ENSMUSG00000065107	n-R5s88	0.7	3.8	0.51	0.118853	1	0.7	3.8	0.54	0.131864	1	9	102127888	102128005	118	52.54	1	rRNA	nuclear encoded rRNA 5S 88 [Source:MGI Symbol;Acc:MGI:4421936]
ENSMUSG00000069114	Zbtb10	55.1	86.3	0.51	0.0984274	0.716453	55.1	86.3	0.52	0.117654	0.763359	3	9250602	9285333	7414	41.2	1	protein_coding	zinc finger and BTB domain containing 10 [Source:HGNC Symbol;Acc:HGNC:30953]
ENSMUSG00000074480	Mex3a	51.8	79.3	0.51	0.0823814	0.685261	51.8	79.3	0.5	0.116229	0.745132	3	88532395	88541396	5778	53.52	1	protein_coding	mex-3 RNA binding family member A [Source:HGNC Symbol;Acc:HGNC:33482]
ENSMUSG00000083183	Gm15575	8.4	15.2	0.51	0.167853	0.907319	8.4	15.2	0.5	0.212143	0.988454	16	38748729	38750309	1581	45.29	-1	processed_pseudogene	predicted gene 15575 [Source:MGI Symbol;Acc:MGI:3783023]
ENSMUSG00000085412	Halr1	8.6	25.8	0.51	0.150581	0.902648	8.6	25.8	0.55	0.164381	0.868373	6	52102949	52113684	981	43.28	1	lincRNA	Hoxa adjacent long noncoding RNA 1 [Source:MGI Symbol;Acc:MGI:3705267]
ENSMUSG00000085486	Gm11634	6.3	14.4	0.51	0.175756	0.944608	6.3	14.4	0.62	0.131628	0.953028	11	101593743	101599256	805	47.15	-1	protein_coding
ENSMUSG00000086697	4933427G23Rik	3.1	7.6	0.51	0.175957	1	3.1	7.6	0.54	0.181877	1	5	23815618	23831897	2515	45.92	-1	transcribed_processed_pseudogene	RIKEN cDNA 4933427G23 gene [Source:MGI Symbol;Acc:MGI:3036235]
ENSMUSG00000087269	D330023K18Rik	11.2	19.9	0.51	0.164235	0.900574	11.2	19.9	0.54	0.169693	0.859476	2	31146457	31152291	1249	44.22	-1	processed_transcript	RIKEN cDNA D330023K18 gene [Source:MGI Symbol;Acc:MGI:2445152]
ENSMUSG00000090381	Gm6158	32.3	51.7	0.51	0.106789	0.739214	32.3	51.7	0.56	0.0988308	0.747105	14	24069734	24070637	904	47.01	1	processed_pseudogene	predicted gene 6158 [Source:MGI Symbol;Acc:MGI:3779562]
ENSMUSG00000091698	Gm6526	4.4	20.6	0.51	0.118994	0.859453	4.4	20.6	0.51	0.165733	0.971742	14	43747866	43755948	1723	39.91	1	protein_coding	predicted gene 6526 [Source:MGI Symbol;Acc:MGI:3648758]
ENSMUSG00000095990	Zfp97	9.5	16.3	0.51	0.153866	0.922462	9.5	16.3	0.5	0.201049	0.986495	17	17121415	17146831	2684	37.94	1	protein_coding	zinc finger protein 97 [Source:MGI Symbol;Acc:MGI:105921]
ENSMUSG00000103039	Gm37123	1.1	7.6	0.51	0.0991635	1	1.1	7.6	0.52	0.124986	1	3	32454587	32455757	1171	46.2	1	TEC	predicted gene, 37123 [Source:MGI Symbol;Acc:MGI:5610351]
ENSMUSG00000111086	Gm48671	4.2	11.4	0.51	0.167409	0.980406	4.2	11.4	0.6	0.135548	0.944015	10	42886705	42888797	739	42.9	-1	lincRNA	predicted gene, 48671 [Source:MGI Symbol;Acc:MGI:6098289]
ENSMUSG00000111212	Gm47087	1.1	4.7	0.51	0.123645	1	1.1	4.7	0.51	0.154905	1	9	13308214	13312446	4233	42.92	1	TEC	predicted gene, 47087 [Source:MGI Symbol;Acc:MGI:6095814]
ENSMUSG00000115763	CT025602.2	2.2	5.9	0.51	0.161866	1	2.2	5.9	0.53	0.18396	1	14	106619588	106620359	772	54.15	-1	processed_pseudogene
ENSMUSG00000116180	AC123724.2	1.9	4.9	0.51	0.15748	1	1.9	4.9	0.49	0.211263	1	15	100600204	100602766	2563	49.2	1	bidirectional_promoter_lncRNA
ENSMUSG00000001403	Ube2c	240.8	390	0.5	0.147072	0.800274	240.8	390	0.37	0.27888	0.905327	2	164769898	164778822	2600	50.81	1	protein_coding	ubiquitin-conjugating enzyme E2C [Source:MGI Symbol;Acc:MGI:1915862]
ENSMUSG00000002289	Angptl4	1.8	6.4	0.5	0.143613	1	1.8	6.4	0.53	0.155516	1	17	33773750	33781575	3286	48.77	-1	protein_coding	Angiopoietin-related protein 4 [Source:UniProtKB/Swiss-Prot;Acc:Q9Z1P8]
ENSMUSG00000004446	Bid	29.8	52.1	0.5	0.169696	0.827687	29.8	52.1	0.45	0.223631	0.879133	6	120891930	120916853	3550	49.71	-1	protein_coding	BH3-interacting domain death agonist BH3-interacting domain death agonist p15 BH3-interacting domain death agonist p13 BH3-interacting domain death agonist p11 [Source:UniProtKB/Swiss-Prot;Acc:P70444]
ENSMUSG00000017677	Wsb1	265.9	394	0.5	0.0414684	0.52855	265.9	394	0.48	0.0657275	0.643667	11	79239372	79254671	3987	40.39	-1	protein_coding	WD repeat and SOCS box-containing 1 [Source:MGI Symbol;Acc:MGI:1926139]
ENSMUSG00000019082	Slc25a22	40.3	65.1	0.5	0.134908	0.789098	40.3	65.1	0.51	0.150965	0.796155	7	141429744	141437892	5992	57.01	-1	protein_coding	solute carrier family 25 (mitochondrial carrier, glutamate), member 22 [Source:MGI Symbol;Acc:MGI:1915517]
ENSMUSG00000019487	Trip10	46.4	73	0.5	0.115648	0.754487	46.4	73	0.52	0.127139	0.775496	17	57249455	57263665	3180	51.68	1	protein_coding	thyroid hormone receptor interactor 10 [Source:MGI Symbol;Acc:MGI:2146901]
ENSMUSG00000021965	Ska3	16.8	28.7	0.5	0.169886	0.912614	16.8	28.7	0.39	0.308579	0.961813	14	57806561	57826185	2705	42.65	-1	protein_coding	Spindle and kinetochore-associated protein 3 [Source:UniProtKB/Swiss-Prot;Acc:Q8C263]
ENSMUSG00000024659	Anxa1	6.7	16.4	0.5	0.174548	0.944608	6.7	16.4	0.67	0.09969	0.891618	19	20373428	20390944	2608	37.27	-1	protein_coding	Annexin A1 [Source:UniProtKB/Swiss-Prot;Acc:P10107]
ENSMUSG00000024912	Fosl1	2.7	9	0.5	0.148861	0.95834	2.7	9	0.49	0.201198	0.987939	19	5447703	5455945	1707	51.1	1	protein_coding	Fos-related antigen 1 [Source:UniProtKB/Swiss-Prot;Acc:P48755]
ENSMUSG00000025270	Alas2	0.3	3.5	0.5	0.088772	1	0.3	3.5	0.51	0.110214	1	X	150547375	150570638	2403	41.27	1	protein_coding	5-aminolevulinate synthase, erythroid-specific, mitochondrial [Source:UniProtKB/Swiss-Prot;Acc:P08680]
ENSMUSG00000026187	Xrcc5	95.1	141	0.5	0.0465891	0.564179	95.1	141	0.47	0.0846239	0.675626	1	72307421	72394952	2555	43.6	1	protein_coding	X-ray repair complementing defective repair in Chinese hamster cells 5 [Source:MGI Symbol;Acc:MGI:104517]
ENSMUSG00000026436	Elk4	109.6	161.1	0.5	0.0145366	0.34006	109.6	161.1	0.54	0.016355	0.355724	1	132007607	132032612	6407	45.02	1	protein_coding	ETS domain-containing protein Elk-4 [Source:UniProtKB/Swiss-Prot;Acc:P41158]
ENSMUSG00000026546	Cfap45	1.3	6.3	0.5	0.123048	1	1.3	6.3	0.55	0.128953	1	1	172520801	172545870	5717	48.57	1	protein_coding	cilia and flagella associated protein 45 [Source:MGI Symbol;Acc:MGI:1919120]
ENSMUSG00000026723	Trdmt1	13.4	26.1	0.5	0.187836	0.919903	13.4	26.1	0.44	0.280672	0.921039	2	13509014	13544668	3835	38.91	-1	protein_coding	tRNA (cytosine(38)-C(5))-methyltransferase [Source:UniProtKB/Swiss-Prot;Acc:O55055]
ENSMUSG00000026875	Traf1	1.1	4.7	0.5	0.133856	1	1.1	4.7	0.48	0.184119	1	2	34941750	34961772	8819	49.77	-1	protein_coding	TNF receptor-associated factor 1 [Source:MGI Symbol;Acc:MGI:101836]
ENSMUSG00000027805	Pfn2	19.8	33.7	0.5	0.169961	0.92021	19.8	33.7	0.5	0.178819	0.83224	3	57841895	57848079	3541	46.66	-1	protein_coding	Profilin-2 [Source:UniProtKB/Swiss-Prot;Acc:Q9JJV2]
ENSMUSG00000028341	Nr4a3	5.3	12.6	0.5	0.180446	0.944608	5.3	12.6	0.56	0.166791	0.966795	4	48045153	48086447	5987	46.08	1	protein_coding	Nuclear receptor subfamily 4 group A member 3 [Source:UniProtKB/Swiss-Prot;Acc:Q9QZB6]
ENSMUSG00000030590	Fam98c	4.2	10.8	0.5	0.180188	0.985236	4.2	10.8	0.56	0.162576	1	7	29152510	29156234	2713	56.03	-1	protein_coding	family with sequence similarity 98 member C [Source:HGNC Symbol;Acc:HGNC:27119]
ENSMUSG00000030796	Tead2	44	69.9	0.5	0.118279	0.81895	44	69.9	0.6	0.0776049	0.669227	7	45215753	45233644	4788	51.11	1	protein_coding	TEA domain family member 2 [Source:MGI Symbol;Acc:MGI:104904]
ENSMUSG00000031066	Usp11	17.4	28.2	0.5	0.135754	0.875847	17.4	28.2	0.57	0.112492	0.767805	X	20703906	20720539	4732	44.13	1	protein_coding	ubiquitin specific peptidase 11 [Source:MGI Symbol;Acc:MGI:2384312]
ENSMUSG00000031372	Trex2	0.5	4.7	0.5	0.0976258	1	0.5	4.7	0.48	0.138015	1	X	73433705	73435344	1017	54.27	-1	protein_coding	three prime repair exonuclease 2 [Source:MGI Symbol;Acc:MGI:1346343]
ENSMUSG00000033356	Pus7l	9.8	19.5	0.5	0.184852	0.91661	9.8	19.5	0.37	0.353498	0.97428	15	94522688	94543547	3291	44.63	-1	protein_coding	Pseudouridylate synthase 7 homolog-like protein [Source:UniProtKB/Swiss-Prot;Acc:Q8CE46]
ENSMUSG00000036599	Chst12	7.9	15.5	0.5	0.184003	0.944608	7.9	15.5	0.51	0.211554	0.988454	5	140505550	140525724	2362	51.82	1	protein_coding	Carbohydrate sulfotransferase 12 [Source:UniProtKB/Swiss-Prot;Acc:Q99LL3]
ENSMUSG00000037579	Kcnh3	11.8	20.5	0.5	0.161088	0.904235	11.8	20.5	0.52	0.179336	0.840944	15	99224861	99242817	5756	54.79	1	protein_coding	Potassium voltage-gated channel subfamily H member 3 [Source:UniProtKB/Swiss-Prot;Acc:Q9WVJ0]
ENSMUSG00000038205	Prkab2	27.2	48.1	0.5	0.17604	0.832654	27.2	48.1	0.71	0.0395767	0.513541	3	97658193	97673812	5096	45.74	1	protein_coding	protein kinase, AMP-activated, beta 2 non-catalytic subunit [Source:MGI Symbol;Acc:MGI:1336185]
ENSMUSG00000038218	Gm9765	1186.2	3629.4	0.5	0.154597	0.80564	1186.2	3629.4	0.53	0.177324	0.818092	1	171515233	171516922	321	47.69	1	unprocessed_pseudogene	predicted gene 9765 [Source:MGI Symbol;Acc:MGI:3642721]
ENSMUSG00000039357	Fut11	56.3	92.5	0.5	0.148907	0.803263	56.3	92.5	0.52	0.154276	0.799135	14	20694968	20701016	4252	47.51	1	protein_coding	Alpha-(1,3)-fucosyltransferase 11 [Source:UniProtKB/Swiss-Prot;Acc:Q8BHC9]
ENSMUSG00000039457	Ppl	37.2	56.4	0.5	0.0857601	0.690647	37.2	56.4	0.44	0.167322	0.81203	16	5086291	5132421	6893	51	-1	protein_coding	periplakin [Source:MGI Symbol;Acc:MGI:1194898]
ENSMUSG00000040260	Daam2	2.6	7.9	0.5	0.167307	1	2.6	7.9	0.56	0.159355	1	17	49456022	49564343	9769	48.1	-1	protein_coding	Disheveled-associated activator of morphosis 2 [Source:UniProtKB/Swiss-Prot;Acc:Q80U19]
ENSMUSG00000042938	Gm14117	4	10.7	0.5	0.169904	0.982305	4	10.7	0.66	0.102666	1	2	146305547	146306389	843	49.82	1	processed_pseudogene	predicted gene 14117 [Source:MGI Symbol;Acc:MGI:3651328]
ENSMUSG00000042942	Greb1l	12.3	24.8	0.5	0.190825	0.922462	12.3	24.8	0.55	0.178296	0.879133	18	10325177	10562934	10927	41.13	1	protein_coding	GREB1-like protein [Source:UniProtKB/Swiss-Prot;Acc:B9EJV3]
ENSMUSG00000043421	Hilpda	43.3	66.6	0.5	0.0953207	0.776978	43.3	66.6	0.48	0.141565	0.779634	6	29272488	29275446	1103	49.44	1	protein_coding	Hypoxia-inducible lipid droplet-associated protein [Source:UniProtKB/Swiss-Prot;Acc:Q9JLS0]
ENSMUSG00000045752	Tssc4	31.4	50.8	0.5	0.120663	0.755205	31.4	50.8	0.58	0.0873501	0.682954	7	143069249	143071093	1845	59.13	1	protein_coding	tumor-suppressing subchromosomal transferable fragment 4 [Source:MGI Symbol;Acc:MGI:1861712]
ENSMUSG00000047766	Lrrc49	23.6	40.1	0.5	0.155695	0.889123	23.6	40.1	0.71	0.0447745	0.585866	9	60568859	60688158	6310	42.97	-1	protein_coding	leucine rich repeat containing 49 [Source:HGNC Symbol;Acc:HGNC:25965]
ENSMUSG00000053134	Supt7l	28.8	43.1	0.5	0.0791475	0.679735	28.8	43.1	0.45	0.160508	0.8656	5	31514564	31527807	6994	46.14	-1	protein_coding	STAGA complex 65 subunit gamma [Source:UniProtKB/Swiss-Prot;Acc:Q9CZV5]
ENSMUSG00000060708	Bloc1s4	15.7	28.4	0.5	0.179683	0.916545	15.7	28.4	0.66	0.0840892	0.730106	5	36747378	36748650	1273	55.46	-1	protein_coding	Biosis of lysosome-related organelles complex 1 subunit 4 [Source:UniProtKB/Swiss-Prot;Acc:Q8VED2]
ENSMUSG00000064128	Cenpj	29	48.8	0.5	0.164232	0.871206	29	48.8	0.51	0.18465	0.828111	14	56526761	56575425	4874	42.21	-1	protein_coding	Centromere protein J [Source:UniProtKB/Swiss-Prot;Acc:Q569L8]
ENSMUSG00000074039	4930520O04Rik	3	9	0.5	0.160971	1	3	9	0.51	0.18365	1	9	114368303	114377229	3745	48.09	1	processed_transcript	RIKEN cDNA 4930520O04 gene [Source:MGI Symbol;Acc:MGI:1922366]
ENSMUSG00000074813	Gm14005	3.9	9.4	0.5	0.175646	0.974334	3.9	9.4	0.45	0.265485	0.997408	2	128178319	128502765	4070	45.96	-1	lincRNA
ENSMUSG00000077167	Gm24119	3.2	9.3	0.5	0.160674	0.966547	3.2	9.3	0.6	0.130932	1	10	91118291	91118536	246	46.34	-1	snoRNA	predicted gene, 24119 [Source:MGI Symbol;Acc:MGI:5453896]
ENSMUSG00000082164	Gm13360	0.2	2.8	0.5	0.0919278	1	0.2	2.8	0.47	0.130469	1	2	20037096	20037894	799	45.93	-1	processed_pseudogene	predicted gene 13360 [Source:MGI Symbol;Acc:MGI:3652147]
ENSMUSG00000087273	Gm13203	7.5	15.5	0.5	0.184701	0.920579	7.5	15.5	0.51	0.215921	0.992455	4	148713703	148716581	520	53.18	1	lincRNA	predicted gene 13203 [Source:MGI Symbol;Acc:MGI:3651445]
ENSMUSG00000095478	Gm9824	4.7	8.9	0.5	0.182872	0.985321	4.7	8.9	0.47	0.248659	0.997408	10	29030128	29030688	561	60.61	1	processed_pseudogene	predicted pseudogene 9824 [Source:MGI Symbol;Acc:MGI:3641964]
ENSMUSG00000097310	A930038B10Rik	1.6	5.3	0.5	0.144167	1	1.6	5.3	0.47	0.204316	1	14	34759402	34770553	6188	46.98	1	lincRNA	RIKEN cDNA A930038B10 gene [Source:MGI Symbol;Acc:MGI:2443813]
ENSMUSG00000098234	Snhg6	193.9	280.4	0.5	0.0102862	0.277482	193.9	280.4	0.47	0.0298695	0.471341	1	9941959	9944118	1146	44.4	-1	lincRNA	small nucleolar RNA host gene 6 [Source:MGI Symbol;Acc:MGI:1921074]
ENSMUSG00000102662	Gm38377	15.8	26.6	0.5	0.154151	0.89249	15.8	26.6	0.52	0.170213	0.821705	2	69018096	69021867	3772	42.74	1	TEC	predicted gene, 38377 [Source:MGI Symbol;Acc:MGI:5611605]
ENSMUSG00000106158	Gm43216	2.6	7.1	0.5	0.17392	1	2.6	7.1	0.54	0.179442	1	5	21031752	21033084	1333	32.26	1	TEC	predicted gene 43216 [Source:MGI Symbol;Acc:MGI:5663353]
ENSMUSG00000109940	Gm45399	5.9	18.3	0.5	#N/A	#N/A	5.9	18.3	0.63	0.119164	0.938356	7	102458245	102459260	1016	40.85	1	TEC	predicted gene 45399 [Source:MGI Symbol;Acc:MGI:5791235]
ENSMUSG00000110803	Gm20275	43.9	70.3	0.5	0.142344	0.793623	43.9	70.3	0.57	0.113491	0.740143	9	59826257	59941077	1387	37.47	-1	antisense	predicted gene, 20275 [Source:MGI Symbol;Acc:MGI:5012460]
ENSMUSG00000112222	Tyms-ps	12.1	19.3	0.5	0.145272	0.834601	12.1	19.3	0.42	0.256345	0.926973	10	87966847	87967761	915	48.74	1	processed_pseudogene	thymidylate synthase, pseudogene [Source:MGI Symbol;Acc:MGI:98879]
ENSMUSG00000115847	AC109172.2	1.9	5.1	0.5	0.170401	1	1.9	5.1	0.48	0.21603	1	14	82855964	82856344	381	44.09	-1	processed_pseudogene
ENSMUSG00000000804	Usp32	63.8	95.5	0.49	0.0866912	0.692851	63.8	95.5	0.47	0.135526	0.777577	11	84984442	85140161	7680	39.1	-1	protein_coding	ubiquitin specific peptidase 32 [Source:MGI Symbol;Acc:MGI:2144475]
ENSMUSG00000001786	Fbxo7	60.3	90	0.49	0.0443842	0.542355	60.3	90	0.59	0.0208542	0.418205	10	86021972	86051873	6180	42.16	1	protein_coding	Mus musculus F-box protein 7 (Fbxo7), transcript variant 3, mRNA. [Source:RefSeq mRNA;Acc:NM_001347151]
ENSMUSG00000005505	Kbtbd4	2.1	6.1	0.49	0.168303	1	2.1	6.1	0.44	0.250597	1	2	90904740	90911626	3139	45.65	1	protein_coding	Kelch repeat and BTB domain-containing protein 4 [Source:UniProtKB/Swiss-Prot;Acc:Q8R179]
ENSMUSG00000007721	Ccdc124	92.1	145.8	0.49	0.14132	0.791757	92.1	145.8	0.56	0.0923552	0.716424	8	70868227	70873935	1696	55.42	-1	protein_coding	Coiled-coil domain-containing protein 124 [Source:UniProtKB/Swiss-Prot;Acc:Q9D8X2]
ENSMUSG00000010911	Apip	33.1	58.9	0.49	0.190241	0.84641	33.1	58.9	0.5	0.212672	0.857982	2	103073675	103092644	1000	42.42	1	protein_coding	Methylthioribulose-1-phosphate dehydratase [Source:UniProtKB/Swiss-Prot;Acc:Q9WVQ5]
ENSMUSG00000011306	Sugp1	122.2	190.8	0.49	0.117033	0.751281	122.2	190.8	0.52	0.112913	0.747105	8	70042813	70072347	6109	47.09	1	protein_coding	SURP and G-patch domain-containing protein 1 [Source:UniProtKB/Swiss-Prot;Acc:Q8CH02]
ENSMUSG00000017204	Gsdma	13.5	29.2	0.49	0.193795	0.944608	13.5	29.2	0.43	0.29045	0.938356	11	98664351	98677708	2726	48.65	1	protein_coding	Gasdermin-A [Source:UniProtKB/Swiss-Prot;Acc:Q9EST1]
ENSMUSG00000020599	Rgs9	3.4	9.7	0.49	0.172569	1	3.4	9.7	0.51	0.186214	0.986495	11	109225355	109298129	6390	47.66	-1	protein_coding	Regulator of G-protein signaling 9 [Source:UniProtKB/Swiss-Prot;Acc:O54828]
ENSMUSG00000020614	Fam20a	20.2	32.9	0.49	0.144584	0.796906	20.2	32.9	0.5	0.178446	0.857099	11	109669749	109722279	3634	46.51	-1	protein_coding	Pseudokinase FAM20A [Source:UniProtKB/Swiss-Prot;Acc:Q8CID3]
ENSMUSG00000020811	Wscd1	1.7	5.3	0.49	0.161562	1	1.7	5.3	0.49	0.196749	1	11	71749920	71789647	4287	50.12	1	protein_coding	WSC domain containing 1 [Source:MGI Symbol;Acc:MGI:2448493]
ENSMUSG00000021569	Trip13	43.8	67.2	0.49	0.103988	0.728619	43.8	67.2	0.42	0.187014	0.833938	13	73911347	73937784	3472	43.28	-1	protein_coding	thyroid hormone receptor interactor 13 [Source:MGI Symbol;Acc:MGI:1916966]
ENSMUSG00000022124	Fbxl3	195.6	286.2	0.49	0.031427	0.468953	195.6	286.2	0.46	0.0633374	0.624734	14	103080239	103099566	5103	41.53	-1	protein_coding	F-box/LRR-repeat protein 3 [Source:UniProtKB/Swiss-Prot;Acc:Q8C4V4]
ENSMUSG00000025091	Pnliprp2	5265.1	8211.2	0.49	0.122064	0.758404	5265.1	8211.2	0.54	0.0916094	0.689905	19	58759723	58777533	1567	46.53	1	protein_coding	pancreatic lipase-related protein 2 [Source:MGI Symbol;Acc:MGI:1336202]
ENSMUSG00000025723	Nmb	6.7	15.7	0.49	0.187024	1	6.7	15.7	0.5	0.214758	0.991809	7	80902227	80905076	793	52.88	-1	protein_coding	Neuromedin-B Neuromedin-B-32 Neuromedin-B [Source:UniProtKB/Swiss-Prot;Acc:Q9CR53]
ENSMUSG00000025969	Nrp2	30.6	48.1	0.49	0.124979	0.763996	30.6	48.1	0.45	0.195963	0.838692	1	62703285	62818695	11842	46.81	1	protein_coding	Neuropilin-2 [Source:UniProtKB/Swiss-Prot;Acc:O35375]
ENSMUSG00000026289	Atg16l1	83.1	125.3	0.49	0.0702616	0.65586	83.1	125.3	0.6	0.023053	0.415305	1	87755870	87792428	9628	44.78	1	protein_coding	autophagy related 16-like 1 (S. cerevisiae) [Source:MGI Symbol;Acc:MGI:1924290]
ENSMUSG00000026981	Il1rn	4.1	18.1	0.49	0.136296	0.89249	4.1	18.1	0.55	0.155154	0.971515	2	24336853	24351494	5535	42.77	1	protein_coding	Interleukin-1 receptor antagonist protein [Source:UniProtKB/Swiss-Prot;Acc:P25085]
ENSMUSG00000027199	Gatm	57.1	106.1	0.49	0.194838	0.850407	57.1	106.1	0.52	0.185246	0.828111	2	122594467	122611303	3001	41.66	-1	protein_coding	Glycine amidinotransferase, mitochondrial [Source:UniProtKB/Swiss-Prot;Acc:Q9D964]
ENSMUSG00000027356	Fermt1	393.8	570.1	0.49	0.0113356	0.293861	393.8	570.1	0.52	0.0137711	0.336189	2	132904389	132945906	5699	42.76	-1	protein_coding	Fermitin family homolog 1 [Source:UniProtKB/Swiss-Prot;Acc:P59113]
ENSMUSG00000027479	Mapre1	368.4	530.9	0.49	0.016335	0.365657	368.4	530.9	0.4	0.0286374	0.46543	2	153741274	153773310	7811	43.48	1	protein_coding	Microtubule-associated protein RP/EB family member 1 [Source:UniProtKB/Swiss-Prot;Acc:Q61166]
ENSMUSG00000028101	Pias3	22.9	35.4	0.49	0.104581	0.728734	22.9	35.4	0.58	0.0749288	0.689762	3	96696384	96706070	3918	53.44	1	protein_coding	E3 SUMO-protein ligase PIAS3 [Source:UniProtKB/Swiss-Prot;Acc:O54714]
ENSMUSG00000028245	Nsmaf	41.2	61.7	0.49	0.0983149	0.716298	41.2	61.7	0.45	0.156252	0.800269	4	6396207	6454271	8368	42.73	-1	protein_coding	neutral sphingomyelinase (N-SMase) activation associated factor [Source:MGI Symbol;Acc:MGI:1341864]
ENSMUSG00000028578	Caap1	59.8	89.7	0.49	0.0751828	0.669532	59.8	89.7	0.45	0.139992	0.788054	4	94500081	94556796	3591	38.19	-1	protein_coding	Caspase activity and apoptosis inhibitor 1 [Source:UniProtKB/Swiss-Prot;Acc:Q8VDY9]
ENSMUSG00000028884	Rpa2	68.7	102.5	0.49	0.0432302	0.542355	68.7	102.5	0.6	0.0140177	0.335361	4	132768332	132778752	2993	47.48	1	protein_coding	replication protein A2 [Source:MGI Symbol;Acc:MGI:1339939]
ENSMUSG00000029247	Paics	252.9	374.3	0.49	0.0615355	0.635158	252.9	374.3	0.46	0.0981938	0.702152	5	76951307	76967509	3139	42.99	1	protein_coding	Mus musculus phosphoribosylaminoimidazole carboxylase, phosphoribosylaminoribosylaminoimidazole, succinocarboxamide synthetase (Paics), transcript variant 5, mRNA. [Source:RefSeq mRNA;Acc:NM_001356974]
ENSMUSG00000031441	Atp11a	80.2	119.3	0.49	0.0720267	0.65586	80.2	119.3	0.43	0.132966	0.767805	8	12757014	12868728	11150	49.44	1	protein_coding	Probable phospholipid-transporting ATPase IH [Source:UniProtKB/Swiss-Prot;Acc:P98197]
ENSMUSG00000031601	Cnot7	289.9	427.5	0.49	0.0531794	0.598895	289.9	427.5	0.5	0.0655136	0.64209	8	40492540	40515847	5821	38.82	-1	protein_coding	CCR4-NOT transcription complex subunit 7 [Source:UniProtKB/Swiss-Prot;Acc:Q60809]
ENSMUSG00000032322	Pstpip1	11.6	27.3	0.49	0.190198	0.931895	11.6	27.3	0.61	0.131914	0.827743	9	56089962	56128888	3830	51.57	1	protein_coding	proline-serine-threonine phosphatase interacting protein 1 [Source:HGNC Symbol;Acc:HGNC:9580]
ENSMUSG00000033752	Mnd1	5.8	13.1	0.49	0.190142	0.944608	5.8	13.1	0.44	0.276353	1	3	84087933	84155786	875	41.6	-1	protein_coding	Meiotic nuclear division [Source:UniProtKB/Swiss-Prot;Acc:Q8K396]
ENSMUSG00000034216	Vps18	19.5	32.2	0.49	0.159399	0.912322	19.5	32.2	0.56	0.119197	0.757473	2	119288740	119298453	4786	51.81	1	protein_coding	VPS18 CORVET/HOPS core subunit [Source:MGI Symbol;Acc:MGI:2443626]
ENSMUSG00000036270	Edc4	73.4	108.9	0.49	0.0561893	0.598895	73.4	108.9	0.49	0.0831206	0.672526	8	105880881	105894908	5497	51.98	1	protein_coding	enhancer of mRNA decapping 4 [Source:HGNC Symbol;Acc:HGNC:17157]
ENSMUSG00000038007	Acer2	91.9	136	0.49	0.0750283	0.668643	91.9	136	0.51	0.0823039	0.690492	4	86874396	86934822	7159	45.39	1	protein_coding	alkaline ceramidase 2 [Source:MGI Symbol;Acc:MGI:1920932]
ENSMUSG00000038578	Susd1	3.6	7.9	0.49	0.189637	0.982305	3.6	7.9	0.53	0.189616	0.981046	4	59314683	59438633	4766	44.81	-1	protein_coding	sushi domain containing 1 [Source:HGNC Symbol;Acc:HGNC:25413]
ENSMUSG00000039914	Coq10a	43.7	66.7	0.49	0.101404	0.728619	43.7	66.7	0.51	0.106116	0.757473	10	128363100	128368997	2573	48.47	-1	protein_coding	coenzyme Q10A [Source:MGI Symbol;Acc:MGI:2684847]
ENSMUSG00000040093	Bmf	8	16.5	0.49	0.192755	0.933911	8	16.5	0.52	0.205975	0.985959	2	118528757	118549687	5253	51.19	-1	protein_coding	Mus musculus BCL2 modifying factor (Bmf), transcript variant 3, mRNA. [Source:RefSeq mRNA;Acc:NM_001331221]
ENSMUSG00000041396	Mettl18	16.4	31.5	0.49	0.197052	0.933643	16.4	31.5	0.55	0.178191	0.831812	1	163994889	163997243	1513	44.2	1	protein_coding	Mus musculus methyltransferase like 18 (Mettl18), transcript variant 2, mRNA. [Source:RefSeq mRNA;Acc:NM_001355132]
ENSMUSG00000041845	Rhod	1.1	8.1	0.49	0.10736	1	1.1	8.1	0.59	0.0894411	1	19	4425459	4439432	1714	49.73	-1	protein_coding	ras homolog family member D [Source:MGI Symbol;Acc:MGI:108446]
ENSMUSG00000047534	Mis18bp1	79.8	120.9	0.49	0.0897569	0.69961	79.8	120.9	0.41	0.176486	0.821484	12	65132734	65172604	7990	37.81	-1	protein_coding	Mis18-binding protein 1 [Source:UniProtKB/Swiss-Prot;Acc:Q80WQ8]
ENSMUSG00000048911	Rnf24	4	10.1	0.49	0.182121	0.977175	4	10.1	0.56	0.160786	1	2	131298064	131352892	6801	42	-1	protein_coding	ring finger protein 24 [Source:MGI Symbol;Acc:MGI:1261771]
ENSMUSG00000049482	Ctu2	20.8	33.1	0.49	0.115804	0.862531	20.8	33.1	0.53	0.118785	0.757473	8	122476143	122484138	5164	58.02	1	protein_coding	Cytoplasmic tRNA 2-thiolation protein 2 [Source:UniProtKB/Swiss-Prot;Acc:Q3U308]
ENSMUSG00000060798	Intu	38.2	69	0.49	0.192873	0.847727	38.2	69	0.49	0.219682	0.879133	3	40531286	40704774	7428	43.11	1	protein_coding	Protein inturned [Source:UniProtKB/Swiss-Prot;Acc:Q059U7]
ENSMUSG00000069300	Hist1h2bj	11.3	19.6	0.49	0.192411	0.922462	11.3	19.6	0.48	0.230004	0.883645	13	22043214	22043676	463	60.91	1	protein_coding	Histone H2B type 1-F/J/L [Source:UniProtKB/Swiss-Prot;Acc:P10853]
ENSMUSG00000071551	Akr1c19	93.2	142.3	0.49	0.110517	0.744362	93.2	142.3	0.56	0.0746879	0.658279	13	4228700	4252843	5892	38.03	1	protein_coding	aldo-keto reductase family 1, member C19 [Source:MGI Symbol;Acc:MGI:2653678]
ENSMUSG00000078861	Zfp931	12	23.4	0.49	0.19875	0.930978	12	23.4	0.42	0.299896	0.949981	2	178067695	178078476	2299	41.93	-1	protein_coding	zinc finger protein 931 [Source:MGI Symbol;Acc:MGI:2441662]
ENSMUSG00000083220	Gm12919	1.1	4.1	0.49	0.145914	1	1.1	4.1	0.46	0.197503	1	4	10853843	10855436	1594	45.61	1	processed_pseudogene	predicted gene 12919 [Source:MGI Symbol;Acc:MGI:3652001]
ENSMUSG00000087701	Gm13493	78.6	115.1	0.49	0.0500564	0.577081	78.6	115.1	0.44	0.110531	0.745033	2	51871126	51871618	493	49.7	-1	processed_pseudogene	predicted gene 13493 [Source:MGI Symbol;Acc:MGI:3650824]
ENSMUSG00000094338	Hist1h2bl	1.7	4.9	0.49	0.165265	1	1.7	4.9	0.45	0.240284	1	13	21715763	21716143	381	63.25	-1	protein_coding	Histone H2B type 1-F/J/L [Source:UniProtKB/Swiss-Prot;Acc:P10853]
ENSMUSG00000096647	Gm6223	7.2	16.6	0.49	0.19019	0.946541	7.2	16.6	0.5	0.223194	0.989946	9	90118937	90119807	871	43.05	1	processed_pseudogene	predicted gene 6223 [Source:MGI Symbol;Acc:MGI:3646615]
ENSMUSG00000096983	2010015M23Rik	1.7	6	0.49	0.152253	1	1.7	6	0.49	0.181888	1	11	88039578	88047360	1199	42.27	-1	lincRNA	RIKEN cDNA 2010015M23 gene [Source:MGI Symbol;Acc:MGI:1919337]
ENSMUSG00000102818	Gm37796	0.5	6.9	0.49	0.0910558	1	0.5	6.9	0.63	0.0672057	1	1	142755193	142755326	134	35.82	1	TEC	predicted gene, 37796 [Source:MGI Symbol;Acc:MGI:5611024]
ENSMUSG00000103672	Gm37621	9.4	21.6	0.49	0.187538	0.922462	9.4	21.6	0.55	0.178432	0.840035	9	101116701	101122231	5531	37.95	1	TEC	predicted gene, 37621 [Source:MGI Symbol;Acc:MGI:5610849]
ENSMUSG00000106696	Gm42729	19.8	34.5	0.49	0.176555	0.832654	19.8	34.5	0.62	0.099601	0.723427	5	65623934	65626863	2930	36.89	1	TEC	predicted gene 42729 [Source:MGI Symbol;Acc:MGI:5662866]
ENSMUSG00000111375	Btbd8	8.8	15.6	0.49	0.193264	1	8.8	15.6	0.44	0.271976	0.998216	5	107437997	107511207	7838	41.67	1	protein_coding	BTB/POZ domain-containing protein 8 [Source:UniProtKB/Swiss-Prot;Acc:D3YUB6]
ENSMUSG00000112880	Gm20337	2.4	8.6	0.49	0.148222	1	2.4	8.6	0.54	0.150663	1	12	80942673	80945396	1118	42.99	-1	bidirectional_promoter_lncRNA	predicted gene, 20337 [Source:MGI Symbol;Acc:MGI:5012522]
ENSMUSG00000113326	Gm47586	52.1	81.9	0.49	0.124155	0.767041	52.1	81.9	0.62	0.043779	0.540984	13	63244221	63246248	2028	42.9	1	TEC	predicted gene, 47586 [Source:MGI Symbol;Acc:MGI:6096627]
ENSMUSG00000115249	AC122291.1	2.5	11.2	0.49	0.131418	0.95834	2.5	11.2	0.52	0.145841	0.949981	15	37960471	37966218	5748	43.6	1	antisense
ENSMUSG00000002102	Psmc3	335.8	492.6	0.48	0.0499042	0.577081	335.8	492.6	0.58	0.00719968	0.232479	2	91054009	91066369	2607	51.95	1	protein_coding	proteasome (prosome, macropain) 26S subunit, ATPase 3 [Source:MGI Symbol;Acc:MGI:1098754]
ENSMUSG00000002845	Tmem39a	119.5	173.5	0.48	0.0439407	0.540807	119.5	173.5	0.48	0.0676322	0.649455	16	38558698	38592162	4094	42.06	1	protein_coding	Transmembrane protein 39A [Source:UniProtKB/Swiss-Prot;Acc:Q9CYC3]
ENSMUSG00000005980	Dnase1	1.8	9.3	0.48	0.128369	0.944608	1.8	9.3	0.58	0.111576	0.925073	16	4036942	4040024	3083	51.02	1	protein_coding	Mus musculus deoxyribonuclease I (Dnase1), transcript variant 2, mRNA. [Source:RefSeq mRNA;Acc:NM_001357143]
ENSMUSG00000015312	Gadd45b	30.8	49.5	0.48	0.152816	0.80355	30.8	49.5	0.57	0.104591	0.757473	10	80930073	80932204	1589	57.83	1	protein_coding	Growth arrest and DNA damage-inducible protein GADD45 beta [Source:UniProtKB/Swiss-Prot;Acc:P22339]
ENSMUSG00000015597	Zfp318	110.4	165.5	0.48	0.0753169	0.674138	110.4	165.5	0.55	0.0426103	0.541776	17	46383731	46420920	8594	42.01	1	protein_coding	zinc finger protein 318 [Source:MGI Symbol;Acc:MGI:1889348]
ENSMUSG00000021113	Snapc1	60	89.7	0.48	0.0864089	0.69195	60	89.7	0.58	0.0444877	0.560415	12	73964481	73988966	7914	42.47	1	protein_coding	snRNA-activating protein complex subunit 1 [Source:UniProtKB/Swiss-Prot;Acc:Q8K0S9]
ENSMUSG00000021470	Ercc6l2	97.1	143.7	0.48	0.0678321	0.645395	97.1	143.7	0.5	0.0811482	0.689762	13	63815240	63900302	15199	37.32	1	protein_coding	DNA excision repair protein ERCC-6-like 2 [Source:UniProtKB/Swiss-Prot;Acc:Q9JIM3]
ENSMUSG00000021476	Habp4	23.4	36.2	0.48	0.11707	0.84641	23.4	36.2	0.54	0.100794	0.775496	13	64161824	64186537	5362	46.31	1	protein_coding	hyaluronan binding protein 4 [Source:HGNC Symbol;Acc:HGNC:17062]
ENSMUSG00000021901	Bap1	44.9	68.3	0.48	0.105501	0.735871	44.9	68.3	0.56	0.0685469	0.651898	14	31251450	31259944	4682	50.79	1	protein_coding	Ubiquitin carboxyl-terminal hydrolase BAP1 [Source:UniProtKB/Swiss-Prot;Acc:Q99PU7]
ENSMUSG00000022199	Slc22a17	9.5	20.4	0.48	0.199979	0.931895	9.5	20.4	0.52	0.205897	0.904874	14	54906304	54913132	4517	55.04	-1	protein_coding	Solute carrier family 22 member 17 [Source:UniProtKB/Swiss-Prot;Acc:Q9D9E0]
ENSMUSG00000022428	Cby1	24.7	37.2	0.48	0.105945	0.736361	24.7	37.2	0.46	0.166035	0.857099	15	79659199	79667660	1228	49.81	1	protein_coding	1 [Source:UniProtKB/Swiss-Prot;Acc:Q9D1C2]
ENSMUSG00000024121	Atp6v0c	7	20.8	0.48	0.173916	0.916063	7	20.8	0.69	0.0868408	0.881077	17	24163866	24169702	3384	54.02	-1	protein_coding	ATPase, H+ transporting, lysosomal V0 subunit C [Source:MGI Symbol;Acc:MGI:88116]
ENSMUSG00000024590	Lmnb1	18.1	33	0.48	0.207505	0.936909	18.1	33	0.44	0.276681	0.928184	18	56707813	56753424	2962	45.15	1	protein_coding	Lamin-B1 [Source:UniProtKB/Swiss-Prot;Acc:P14733]
ENSMUSG00000024948	Map4k2	31.3	49.6	0.48	0.149723	0.861745	31.3	49.6	0.54	0.11446	0.757473	19	6341135	6355615	6646	54.2	1	protein_coding	Mitogen-activated protein kinase kinase kinase kinase 2 [Source:UniProtKB/Swiss-Prot;Acc:Q61161]
ENSMUSG00000025436	Atp23	29.7	44.2	0.48	0.106511	0.80319	29.7	44.2	0.43	0.187062	0.86458	10	126868427	126901355	4211	44.81	-1	protein_coding	Mitochondrial inner membrane protease ATP23 homolog [Source:UniProtKB/Swiss-Prot;Acc:Q9CWQ3]
ENSMUSG00000026305	Lrrfip1	161	236.9	0.48	0.0748939	0.668419	161	236.9	0.49	0.0881868	0.693684	1	90998737	91128944	6469	47.76	1	protein_coding	leucine rich repeat (in FLII) interacting protein 1 [Source:MGI Symbol;Acc:MGI:1342770]
ENSMUSG00000026433	Rab29	38.1	59.6	0.48	0.133895	0.843544	38.1	59.6	0.52	0.125255	0.765854	1	131867224	131872887	1468	46.35	1	protein_coding	RAB29, member RAS oncogene family [Source:MGI Symbol;Acc:MGI:2385107]
ENSMUSG00000026930	Gpsm1	7.7	14.5	0.48	0.20332	0.95789	7.7	14.5	0.5	0.223064	0.991809	2	26315515	26348237	5383	53.32	1	protein_coding	Mus musculus G-protein signalling modulator 1 (AGS3-like, C. elegans) (Gpsm1), transcript variant 5, mRNA. [Source:RefSeq mRNA;Acc:NM_001355575]
ENSMUSG00000027188	Pamr1	4	15.5	0.48	0.150138	0.917723	4	15.5	0.66	0.0939876	0.890853	2	102550012	102643041	6046	42.47	1	protein_coding	Inactive serine protease PAMR1 [Source:UniProtKB/Swiss-Prot;Acc:Q8BU25]
ENSMUSG00000027610	Gss	68.6	104.7	0.48	0.110109	0.739862	68.6	104.7	0.68	0.0215667	0.415305	2	155563181	155592810	5915	46.52	-1	protein_coding	glutathione synthetase [Source:MGI Symbol;Acc:MGI:95852]
ENSMUSG00000028614	Ndc1	44.9	73.8	0.48	0.186215	0.84641	44.9	73.8	0.3	0.418646	0.964598	4	107367784	107416346	4924	43.55	1	protein_coding	Nucleoporin NDC1 [Source:UniProtKB/Swiss-Prot;Acc:Q8VCB1]
ENSMUSG00000030513	Pcsk6	3.1	10.6	0.48	0.160403	1	3.1	10.6	0.49	0.19144	0.98668	7	65861734	66050386	5190	47.27	1	protein_coding	proprotein convertase subtilisin/kexin type 6 [Source:MGI Symbol;Acc:MGI:102897]
ENSMUSG00000034220	Gpc1	0.5	6.3	0.48	0.0975027	1	0.5	6.3	0.54	0.105798	1	1	92831645	92860779	5159	54.48	1	protein_coding	glypican 1 [Source:MGI Symbol;Acc:MGI:1194891]
ENSMUSG00000034761	Map4k5	85.8	130.5	0.48	0.103547	0.733705	85.8	130.5	0.59	0.0475215	0.552936	12	69803750	69893200	8614	41.88	-1	protein_coding	Mitogen-activated protein kinase kinase kinase kinase 5 [Source:UniProtKB/Swiss-Prot;Acc:Q8BPM2]
ENSMUSG00000035615	Frmpd1	0.3	4	0.48	0.0908681	1	0.3	4	0.47	0.12842	1	4	45184875	45285936	5324	47.04	1	protein_coding	FERM and PDZ domain-containing protein 1 [Source:UniProtKB/Swiss-Prot;Acc:A2AKB4]
ENSMUSG00000037242	Clic4	175.2	250.3	0.48	0.0212652	0.398471	175.2	250.3	0.48	0.0354224	0.499551	4	135213969	135272814	6572	45.48	-1	protein_coding	Chloride intracellular channel protein 4 [Source:UniProtKB/Swiss-Prot;Acc:Q9QYB1]
ENSMUSG00000037493	Cib2	131.2	189.5	0.48	0.0502687	0.577081	131.2	189.5	0.44	0.0895675	0.687452	9	54544794	54560218	1433	50.85	-1	protein_coding	Calcium and integrin-binding family member 2 [Source:UniProtKB/Swiss-Prot;Acc:Q9Z309]
ENSMUSG00000038572	Bpifb5	0.3	50.3	0.48	0.071804	0.751281	0.3	50.3	0.47	0.100342	0.760697	2	154223742	154240902	1637	50.56	1	protein_coding	BPI fold containing family B, member 5 [Source:MGI Symbol;Acc:MGI:2385160]
ENSMUSG00000040658	Dnph1	29.8	44.9	0.48	0.104209	0.735294	29.8	44.9	0.52	0.104769	0.787821	17	46496789	46499618	1106	52.44	1	protein_coding	2'-deoxynucleoside 5'-phosphate N-hydrolase 1 [Source:UniProtKB/Swiss-Prot;Acc:Q80VJ3]
ENSMUSG00000041769	Ppp2r2d	111.1	164.2	0.48	0.0581188	0.618964	111.1	164.2	0.54	0.0421989	0.526852	7	138846079	138883057	5903	44	1	protein_coding	protein phosphatase 2, regulatory subunit B, delta [Source:MGI Symbol;Acc:MGI:1289252]
ENSMUSG00000045467	Ttll13	1.7	8.2	0.48	0.138464	1	1.7	8.2	0.58	0.112491	1	7	80246376	80260821	4321	48.39	1	protein_coding	tubulin tyrosine ligase-like family, member 13 [Source:MGI Symbol;Acc:MGI:1920845]
ENSMUSG00000046993	Gm5637	15.7	25.4	0.48	0.159989	0.852975	15.7	25.4	0.5	0.177064	0.829725	X	60045111	60046229	1119	57.55	-1	processed_pseudogene	predicted pseudogene 5637 [Source:MGI Symbol;Acc:MGI:3648120]
ENSMUSG00000050373	Snx21	15.1	27.3	0.48	0.198048	0.944608	15.1	27.3	0.76	0.0380285	0.516123	2	164785823	164793816	4760	52.09	1	protein_coding	Sorting nexin-21 [Source:UniProtKB/Swiss-Prot;Acc:Q3UR97]
ENSMUSG00000055629	B4galnt4	12	20.8	0.48	0.194863	0.879418	12	20.8	0.51	0.204224	0.890853	7	141061104	141072400	3852	55.62	1	protein_coding	N-acetyl-beta-glucosaminyl-glycoprotein 4-beta-N-acetylgalactosaminyltransferase 1 [Source:UniProtKB/Swiss-Prot;Acc:Q766D5]
ENSMUSG00000055733	Nap1l3	1.9	7.8	0.48	0.148722	1	1.9	7.8	0.51	0.160837	1	X	122394565	122397401	2837	43.07	-1	protein_coding	Nucleosome assembly protein 1-like 3 [Source:UniProtKB/Swiss-Prot;Acc:Q794H2]
ENSMUSG00000056055	Sag	3.2	7.5	0.48	0.200166	1	3.2	7.5	0.52	0.195018	1	1	87803680	87845158	8904	46.58	1	protein_coding	S-antigen, retina and pineal gland (arrestin) [Source:MGI Symbol;Acc:MGI:98227]
ENSMUSG00000056305	Usp39	73.9	111.7	0.48	0.101496	0.728619	73.9	111.7	0.49	0.119841	0.766502	6	72318678	72345184	2445	45	-1	protein_coding	ubiquitin specific peptidase 39 [Source:MGI Symbol;Acc:MGI:107622]
ENSMUSG00000056310	Tyw1	47.9	75.6	0.48	0.147787	0.803306	47.9	75.6	0.49	0.164161	0.838692	5	130255619	130341563	7388	47.02	1	protein_coding	tRNA-yW synthesizing protein 1 homolog (S. cerevisiae) [Source:MGI Symbol;Acc:MGI:2141161]
ENSMUSG00000059540	Tcea2	14.2	22.2	0.48	0.148785	0.901061	14.2	22.2	0.43	0.238438	0.929264	2	181680310	181688071	2704	51.16	1	protein_coding	transcription elongation factor A (SII), 2 [Source:MGI Symbol;Acc:MGI:107368]
ENSMUSG00000067212	H2-T23	183.5	273.7	0.48	0.0848108	0.690647	183.5	273.7	0.51	0.0767098	0.665762	17	36029773	36032855	2889	54.14	-1	protein_coding	H-2 class I histocompatibility antigen, D-37 alpha chain [Source:UniProtKB/Swiss-Prot;Acc:P06339]
ENSMUSG00000068855	Hist2h2ac	21.4	34.1	0.48	0.16254	0.914037	21.4	34.1	0.43	0.254871	0.901266	3	96220361	96220880	520	61.15	-1	protein_coding	Histone H2A type 2-C [Source:UniProtKB/Swiss-Prot;Acc:Q64523]
ENSMUSG00000070427	Il18bp	17.7	31.7	0.48	0.199729	0.859453	17.7	31.7	0.41	0.312717	0.963015	7	102014885	102018690	3026	49.26	-1	protein_coding	Interleukin-18-binding protein [Source:UniProtKB/Swiss-Prot;Acc:Q9Z0M9]
ENSMUSG00000072964	Bhlhb9	61.5	94.2	0.48	0.135217	0.782865	61.5	94.2	0.48	0.161732	0.808038	X	135797594	135891081	4800	40.72	1	protein_coding	Protein BHLHb9 [Source:UniProtKB/Swiss-Prot;Acc:Q6PB60]
ENSMUSG00000073555	Gm4951	1.6	6.6	0.48	0.145247	1	1.6	6.6	0.5	0.183531	1	18	60212080	60247820	2645	39.89	1	protein_coding
ENSMUSG00000074781	Ube2n	52.4	79.1	0.48	0.111427	0.740991	52.4	79.1	0.42	0.190161	0.856143	10	95515145	95545657	4221	40.77	1	protein_coding	ubiquitin-conjugating enzyme E2N [Source:MGI Symbol;Acc:MGI:1934835]
ENSMUSG00000078128	Gm2178	1.7	7	0.48	0.144169	1	1.7	7	0.53	0.146792	1	14	26514554	26514910	357	47.34	1	processed_pseudogene	predicted gene 2178 [Source:MGI Symbol;Acc:MGI:3780348]
ENSMUSG00000079988	Gm11970	7.4	12.6	0.48	0.191662	1	7.4	12.6	0.46	0.252384	0.994375	11	6446218	6446537	320	46.56	1	processed_pseudogene	predicted gene 11970 [Source:MGI Symbol;Acc:MGI:3650056]
ENSMUSG00000081999	Gm13461	136.7	195.7	0.48	0.020251	0.389965	136.7	195.7	0.45	0.0496551	0.562248	2	41987473	41988829	662	47.53	-1	processed_pseudogene	predicted gene 13461 [Source:MGI Symbol;Acc:MGI:3650103]
ENSMUSG00000084220	Gm12387	8.5	17.9	0.48	0.204892	0.944608	8.5	17.9	0.49	0.23391	0.997252	4	39895208	39896162	955	39.69	-1	processed_pseudogene	predicted gene 12387 [Source:MGI Symbol;Acc:MGI:3651413]
ENSMUSG00000084939	Gm830	57.3	92.3	0.48	0.175727	0.832654	57.3	92.3	0.46	0.217384	0.868167	4	95464724	95487394	3502	42.79	-1	processed_transcript	predicted gene 830 [Source:MGI Symbol;Acc:MGI:2685676]
ENSMUSG00000085711	Gm15163	25	44.3	0.48	0.19181	0.922462	25	44.3	0.69	0.0678658	0.658279	X	157016229	157017530	1302	49.85	-1	processed_pseudogene	predicted gene 15163 [Source:MGI Symbol;Acc:MGI:3642430]
ENSMUSG00000089715	Cbx6	88	131.5	0.48	0.0690524	0.650216	88	131.5	0.52	0.0740921	0.658279	15	79823896	79834688	10609	54.98	-1	protein_coding	Chromobox protein homolog 6 [Source:UniProtKB/Swiss-Prot;Acc:Q9DBY5]
ENSMUSG00000094392	Gm3788	199.8	295.6	0.48	0.0706858	0.665776	199.8	295.6	0.55	0.0451773	0.55572	3	86672033	86672168	136	51.47	-1	processed_pseudogene	predicted gene 3788 [Source:MGI Symbol;Acc:MGI:3781961]
ENSMUSG00000097673	Gm26608	1.6	9	0.48	0.127184	1	1.6	9	0.61	0.0955888	1	5	28019465	28071105	2886	46.07	-1	lincRNA	predicted gene, 26608 [Source:MGI Symbol;Acc:MGI:5477102]
ENSMUSG00000098761	Gm18821	5.3	9.4	0.48	0.201771	0.985239	5.3	9.4	0.43	0.296579	1	9	71908843	71909551	709	46.69	1	processed_pseudogene	predicted gene, 18821 [Source:MGI Symbol;Acc:MGI:5011006]
ENSMUSG00000103137	Gm37981	3.4	8.3	0.48	0.196209	1	3.4	8.3	0.48	0.227177	1	1	171679336	171679870	535	50.28	-1	processed_pseudogene	predicted gene, 37981 [Source:MGI Symbol;Acc:MGI:5611209]
ENSMUSG00000106884	Gm20156	3.6	7.3	0.48	0.206879	1	3.6	7.3	0.49	0.231352	1	5	41934397	41935672	1276	44.36	-1	processed_pseudogene	predicted gene, 20156 [Source:MGI Symbol;Acc:MGI:5012341]
ENSMUSG00000109045	Gm45084	6.3	14.2	0.48	0.20141	0.942257	6.3	14.2	0.56	0.1669	0.972258	7	118229401	118231357	1957	37.97	-1	TEC	predicted gene 45084 [Source:MGI Symbol;Acc:MGI:5753660]
ENSMUSG00000110357	A030001D20Rik	2.2	8.3	0.48	0.155041	1	2.2	8.3	0.56	0.14291	1	7	45635680	45638765	1542	49.55	-1	antisense	RIKEN cDNA A030001D20 gene [Source:MGI Symbol;Acc:MGI:3696869]
ENSMUSG00000115812	AC120375.2	15	24.8	0.48	0.17775	0.863919	15	24.8	0.52	0.18102	0.870542	14	31801559	31803411	1853	41.18	1	transcribed_processed_pseudogene
ENSMUSG00000002731	Prkra	77.9	114.4	0.47	0.0762674	0.671728	77.9	114.4	0.53	0.0550564	0.590568	2	76629898	76648015	2028	42.86	-1	protein_coding	Interferon-inducible double-stranded RNA-dependent protein kinase activator A [Source:UniProtKB/Swiss-Prot;Acc:Q9WTX2]
ENSMUSG00000002835	Chaf1a	7.7	20.8	0.47	0.194804	0.935446	7.7	20.8	0.5	0.20422	0.988454	17	56040416	56068026	3308	48.05	1	protein_coding	Chromatin assembly factor 1 subunit A [Source:UniProtKB/Swiss-Prot;Acc:Q9QWF0]
ENSMUSG00000006435	Neurl1a	17.7	32.7	0.47	0.216692	0.91661	17.7	32.7	0.35	0.389222	0.956972	19	47178820	47259440	4411	50.56	1	protein_coding	E3 ubiquitin-protein ligase NEURL1 [Source:UniProtKB/Swiss-Prot;Acc:Q923S6]
ENSMUSG00000008540	Mgst1	599.2	930.6	0.47	0.153733	0.804836	599.2	930.6	0.48	0.170536	0.810596	6	138140316	138156755	2013	42.94	1	protein_coding	Microsomal glutathione S-transferase 1 [Source:UniProtKB/Swiss-Prot;Acc:Q91VS7]
ENSMUSG00000008999	Bmp7	141.1	204.7	0.47	0.0715492	0.662685	141.1	204.7	0.43	0.0994551	0.704639	2	172868012	172940321	4019	52.07	-1	protein_coding	Bone morphotic protein 7 [Source:UniProtKB/Swiss-Prot;Acc:P23359]
ENSMUSG00000013236	Ptprs	55.8	83.9	0.47	0.119918	0.755048	55.8	83.9	0.47	0.148048	0.800269	17	56412426	56476483	14990	55.76	-1	protein_coding	Receptor-type tyrosine-protein phosphatase S [Source:UniProtKB/Swiss-Prot;Acc:B0V2N1]
ENSMUSG00000013539	Tango2	52.9	77	0.47	0.0589791	0.617338	52.9	77	0.49	0.0754621	0.658927	16	18300825	18348103	7040	47.51	-1	protein_coding	transport and golgi organization 2 [Source:MGI Symbol;Acc:MGI:101825]
ENSMUSG00000017716	Birc5	169.1	241.5	0.47	0.0236556	0.412928	169.1	241.5	0.45	0.0505638	0.562248	11	117849251	117855743	3402	46.94	1	protein_coding	Baculoviral IAP repeat-containing protein 5 [Source:UniProtKB/Swiss-Prot;Acc:O70201]
ENSMUSG00000020792	Exoc7	55	87.8	0.47	0.165718	0.827687	55	87.8	0.52	0.135669	0.792786	11	116288001	116307233	4367	53.42	-1	protein_coding	Exocyst complex component 7 [Source:UniProtKB/Swiss-Prot;Acc:O35250]
ENSMUSG00000021738	Atxn7	128.5	188	0.47	0.0731504	0.662523	128.5	188	0.51	0.060116	0.626737	14	13961440	14107302	7978	42.45	1	protein_coding	Ataxin-7 [Source:UniProtKB/Swiss-Prot;Acc:Q8R4I1]
ENSMUSG00000022464	Slc38a4	6.3	70.5	0.47	0.0996046	0.727442	6.3	70.5	0.46	0.143116	0.792895	15	96994820	97055956	4261	44.24	-1	protein_coding	Mus musculus solute carrier family 38, member 4 (Slc38a4), transcript variant 1, mRNA. [Source:RefSeq mRNA;Acc:NM_001358060]
ENSMUSG00000022514	Il1rap	23.1	34.8	0.47	0.13096	0.837963	23.1	34.8	0.46	0.187168	0.86458	16	26581704	26730117	11360	39.51	1	protein_coding	Interleukin-1 receptor accessory protein [Source:UniProtKB/Swiss-Prot;Acc:Q61730]
ENSMUSG00000022674	Ube2v2	24.9	41.1	0.47	0.204426	0.944608	24.9	41.1	0.4	0.298945	0.949981	16	15552077	15595773	7132	39.06	-1	protein_coding	ubiquitin-conjugating enzyme E2 variant 2 [Source:MGI Symbol;Acc:MGI:1917870]
ENSMUSG00000023915	Tnfrsf21	26.4	40.7	0.47	0.154288	0.862585	26.4	40.7	0.47	0.190551	0.84324	17	43016555	43089188	3626	44.52	1	protein_coding	Tumor necrosis factor receptor superfamily member 21 [Source:UniProtKB/Swiss-Prot;Acc:Q9EPU5]
ENSMUSG00000024640	Psat1	189.9	278.5	0.47	0.0869127	0.693746	189.9	278.5	0.49	0.0891624	0.686454	19	15904678	15947337	4254	45.71	-1	protein_coding	phosphoserine aminotransferase 1 [Source:MGI Symbol;Acc:MGI:2183441]
ENSMUSG00000024773	Atg2a	38.8	59.5	0.47	0.119618	0.7548	38.8	59.5	0.57	0.0693836	0.655575	19	6241668	6262335	7693	56.01	1	protein_coding	Autophagy-related A [Source:UniProtKB/Swiss-Prot;Acc:Q6P4T0]
ENSMUSG00000024966	Stip1	140.1	200.3	0.47	0.0206301	0.393807	140.1	200.3	0.5	0.0265007	0.448485	19	7020696	7040026	2173	45.97	-1	protein_coding	Stress-induced-phosphoprotein 1 [Source:UniProtKB/Swiss-Prot;Acc:Q60864]
ENSMUSG00000025001	Hells	186.9	279.2	0.47	0.113616	0.744618	186.9	279.2	0.44	0.161685	0.815255	19	38930915	38971051	7205	37.48	1	protein_coding	Lymphocyte-specific helicase [Source:UniProtKB/Swiss-Prot;Acc:Q60848]
ENSMUSG00000025140	Pycr1	235.4	362	0.47	0.142562	0.793623	235.4	362	0.52	0.120827	0.757473	11	120635712	120643769	3935	51.5	-1	protein_coding	pyrroline-5-carboxylate reductase 1 [Source:MGI Symbol;Acc:MGI:2384795]
ENSMUSG00000025357	Dgka	67.1	101.6	0.47	0.111008	0.740392	67.1	101.6	0.66	0.0124655	0.321046	10	128720134	128744855	4762	46.62	-1	protein_coding	Mus musculus diacylglycerol kinase, alpha (Dgka), transcript variant 2, mRNA. [Source:RefSeq mRNA;Acc:NM_001358745]
ENSMUSG00000027171	Prrg4	7.7	15.8	0.47	0.210894	0.95834	7.7	15.8	0.47	0.247055	0.997408	2	104830741	104849876	3165	42.83	-1	protein_coding	proline rich Gla (G-carboxyglutamic acid) 4 (transmembrane) [Source:MGI Symbol;Acc:MGI:2442211]
ENSMUSG00000027313	Chac1	53.9	99.4	0.47	0.21559	0.86264	53.9	99.4	0.56	0.161682	0.821705	2	119351229	119354381	1637	52.74	1	protein_coding	Glutathione-specific gamma-glutamylcyclotransferase 1 [Source:UniProtKB/Swiss-Prot;Acc:Q8R3J5]
ENSMUSG00000027876	Reg4	11077.9	16680.3	0.47	0.132044	0.775744	11077.9	16680.3	0.49	0.117875	0.745033	3	98222156	98236748	1021	45.23	1	protein_coding	Rerating islet-derived protein 4 [Source:UniProtKB/Swiss-Prot;Acc:Q9D8G5]
ENSMUSG00000028073	Pear1	3.7	9	0.47	0.204187	0.985615	3.7	9	0.49	0.220962	0.991385	3	87747890	87824306	6781	53.46	-1	protein_coding	platelet endothelial aggregation receptor 1 [Source:MGI Symbol;Acc:MGI:1920432]
ENSMUSG00000028649	Macf1	267.3	381.4	0.47	0.0151187	0.34006	267.3	381.4	0.49	0.024712	0.428653	4	123349633	123684360	31402	42.34	-1	protein_coding	microtubule-actin crosslinking factor 1 [Source:HGNC Symbol;Acc:HGNC:13664]
ENSMUSG00000028865	Cd164l2	3	12.4	0.47	0.153607	1	3	12.4	0.7	0.0757285	0.844271	4	133212131	133224555	1827	52.84	1	protein_coding	CD164 sialomucin-like 2 protein [Source:UniProtKB/Swiss-Prot;Acc:Q9D6W7]
ENSMUSG00000029177	Cenpa	114.6	181.3	0.47	0.171042	0.832654	114.6	181.3	0.3	0.394805	0.95024	5	30666777	30674830	5860	46.83	1	protein_coding	Histone H3-like centromeric protein A [Source:UniProtKB/Swiss-Prot;Acc:O35216]
ENSMUSG00000030061	Uba3	163.4	231.6	0.47	0.0123398	0.306269	163.4	231.6	0.48	0.0224164	0.412872	6	97183670	97205647	6368	38.21	-1	protein_coding	ubiquitin-like modifier activating enzyme 3 [Source:MGI Symbol;Acc:MGI:1341217]
ENSMUSG00000030161	Gabarapl1	73.4	107.1	0.47	0.0870951	0.699341	73.4	107.1	0.49	0.103682	0.740883	6	129533160	129542346	2013	46.5	1	protein_coding	Gamma-aminobutyric acid receptor-associated protein-like 1 [Source:UniProtKB/Swiss-Prot;Acc:Q8R3R8]
ENSMUSG00000031805	Jak3	9.2	21.9	0.47	0.208139	0.889123	9.2	21.9	0.61	0.132652	0.828111	8	71676296	71690575	5352	56.86	1	protein_coding	Janus kinase 3 [Source:HGNC Symbol;Acc:HGNC:6193]
ENSMUSG00000034501	Pcnx4	22.5	36.1	0.47	0.178215	0.834535	22.5	36.1	0.45	0.230011	0.878142	12	72536383	72580119	4300	41.14	1	protein_coding	pecanex homolog 4 [Source:HGNC Symbol;Acc:HGNC:20349]
ENSMUSG00000034795	Ccdc122	14.6	27	0.47	0.216043	0.944608	14.6	27	0.43	0.289383	0.945769	14	77036772	77112257	1985	39.45	1	protein_coding	Coiled-coil domain-containing protein 122 [Source:UniProtKB/Swiss-Prot;Acc:Q8BVN0]
ENSMUSG00000036264	Fstl4	7.9	14.1	0.47	0.21112	0.953033	7.9	14.1	0.47	0.245134	0.994375	11	52764634	53188538	4380	46.9	1	protein_coding	Follistatin-related protein 4 [Source:UniProtKB/Swiss-Prot;Acc:Q5STE3]
ENSMUSG00000036819	Jmjd4	21.7	36.1	0.47	0.195207	0.902648	21.7	36.1	0.49	0.204702	0.890853	11	59450045	59458567	7115	48.93	1	protein_coding	JmjC domain-containing protein 4 [Source:UniProtKB/Swiss-Prot;Acc:Q8BFT6]
ENSMUSG00000037784	Dzip1l	5.3	9.4	0.47	0.20955	1	5.3	9.4	0.44	0.277383	1	9	99629496	99669256	7984	47.79	1	protein_coding	Zinc finger protein DZIP1L [Source:UniProtKB/Swiss-Prot;Acc:Q499E4]
ENSMUSG00000038894	Irs2	118.3	172.3	0.47	0.0550635	0.597598	118.3	172.3	0.63	0.0045403	0.18858	8	10984681	11008458	6323	49.24	-1	protein_coding	Insulin receptor substrate 2 [Source:UniProtKB/Swiss-Prot;Acc:P81122]
ENSMUSG00000040694	Apobec2	0.8	4.4	0.47	0.131059	1	0.8	4.4	0.45	0.17455	1	17	48419231	48432728	1218	48.02	-1	protein_coding	apolipoprotein B mRNA editing enzyme, catalytic polypeptide 2 [Source:MGI Symbol;Acc:MGI:1343178]
ENSMUSG00000043618	Eif5al3-ps	52.8	84.3	0.47	0.170503	0.828216	52.8	84.3	0.61	0.0737712	0.658279	5	90132229	90132675	447	50.11	1	processed_pseudogene	eukaryotic translation initiation factor 5A-like 3, pseudogene [Source:MGI Symbol;Acc:MGI:3643585]
ENSMUSG00000044149	Nkrf	40.2	68.5	0.47	0.19504	0.850407	40.2	68.5	0.52	0.183744	0.846631	X	36887540	36902899	3268	39.93	-1	protein_coding	NF-kappa-B-repressing factor [Source:UniProtKB/Swiss-Prot;Acc:Q8BY02]
ENSMUSG00000044694	2010007H06Rik	49.9	89.1	0.47	0.207421	0.861507	49.9	89.1	0.7	0.0724387	0.655575	9	51278513	51284210	4934	47.91	1	antisense	RIKEN cDNA 2010007H06 gene [Source:MGI Symbol;Acc:MGI:1917099]
ENSMUSG00000044968	Napepld	78	113.4	0.47	0.0632676	0.632143	78	113.4	0.45	0.112482	0.739024	5	21662901	21701396	3956	43.46	-1	protein_coding	N-acyl-phosphatidylethanolamine-hydrolyzing phospholipase D [Source:UniProtKB/Swiss-Prot;Acc:Q8BH82]
ENSMUSG00000048106	4632415L05Rik	24.2	38.9	0.47	0.164969	0.916063	24.2	38.9	0.5	0.172217	0.877138	3	19894886	19898984	4099	46.52	1	lincRNA	RIKEN cDNA 4632415L05 gene [Source:MGI Symbol;Acc:MGI:1918058]
ENSMUSG00000050989	Selenon	14.1	24.6	0.47	0.207261	0.889123	14.1	24.6	0.37	0.357845	0.953028	4	134537892	134552166	3619	54.77	-1	protein_coding	Selenoprotein N [Source:UniProtKB/Swiss-Prot;Acc:D3Z2R5]
ENSMUSG00000057409	Zfp53	46.7	68.8	0.47	0.102364	0.729031	46.7	68.8	0.45	0.147706	0.790956	17	21491256	21509764	2058	38.67	1	protein_coding	zinc finger protein 53 [Source:MGI Symbol;Acc:MGI:99200]
ENSMUSG00000058317	Ube2e2	64.3	93.9	0.47	0.0817602	0.683345	64.3	93.9	0.44	0.133986	0.803338	14	18573575	18894267	4628	40.88	-1	protein_coding	ubiquitin-conjugating enzyme E2E 2 [Source:MGI Symbol;Acc:MGI:2384997]
ENSMUSG00000062309	Rpp25	2.3	10.8	0.47	0.143652	0.957844	2.3	10.8	0.63	0.0979397	0.890853	9	57504026	57505448	1423	59.1	1	protein_coding	Ribonuclease P protein subunit p25 [Source:UniProtKB/Swiss-Prot;Acc:Q91WE3]
ENSMUSG00000062729	Ppox	27.4	43.1	0.47	0.168575	0.83043	27.4	43.1	0.48	0.196599	0.850498	1	171275990	171281186	4515	52.88	-1	protein_coding	Protoporphyrinogen oxidase [Source:UniProtKB/Swiss-Prot;Acc:P51175]
ENSMUSG00000064602	Snora41	1.8	7.7	0.47	0.146219	1	1.8	7.7	0.49	0.169633	1	1	63179004	63179135	132	43.18	1	snoRNA	small nucleolar RNA, H/ACA box 41 [Source:MGI Symbol;Acc:MGI:3819505]
ENSMUSG00000074652	Myh7b	2.1	11.4	0.47	0.137363	1	2.1	11.4	0.64	0.0885093	1	2	155611212	155634307	6634	54.75	1	protein_coding	Myosin-7B [Source:UniProtKB/Swiss-Prot;Acc:A2AQP0]
ENSMUSG00000082066	Gm13904	9.3	15.9	0.47	0.203893	0.944608	9.3	15.9	0.49	0.221331	0.991385	2	107010938	107011774	837	51.73	1	processed_pseudogene	predicted gene 13904 [Source:MGI Symbol;Acc:MGI:3651201]
ENSMUSG00000083327	Vcp-rs	145.4	212.6	0.47	0.0681208	0.65146	145.4	212.6	0.49	0.0798018	0.687139	X	104345829	104348234	2406	48.46	-1	processed_pseudogene	valosin containing protein, related sequence [Source:MGI Symbol;Acc:MGI:894298]
ENSMUSG00000083365	Gm12895	6.9	14.6	0.47	0.213615	0.944608	6.9	14.6	0.58	0.15119	0.96378	4	122455210	122455435	226	71.24	1	processed_pseudogene	predicted gene 12895 [Source:MGI Symbol;Acc:MGI:3649907]
ENSMUSG00000087294	Gm13556	0.5	3.9	0.47	0.117383	1	0.5	3.9	0.45	0.153904	1	2	38285307	38287291	1412	49.97	1	antisense	predicted gene 13556 [Source:MGI Symbol;Acc:MGI:3651929]
ENSMUSG00000091410	Gm17150	2.8	7.5	0.47	0.196776	1	2.8	7.5	0.56	0.166713	1	19	58790195	58790575	381	55.12	1	processed_pseudogene	predicted gene 17150 [Source:MGI Symbol;Acc:MGI:4937977]
ENSMUSG00000096726	Gm5558	8.3	13.7	0.47	0.205233	0.95834	8.3	13.7	0.42	0.288136	1	5	91806579	91807073	495	48.69	-1	processed_pseudogene	predicted gene 5558 [Source:MGI Symbol;Acc:MGI:3644616]
ENSMUSG00000097402	Gm17399	1.4	7.6	0.47	0.132053	1	1.4	7.6	0.49	0.153098	1	9	118150231	118170376	1181	43.37	1	lincRNA	predicted gene, 17399 [Source:MGI Symbol;Acc:MGI:4937033]
ENSMUSG00000101800	Rnf170-ps	1.2	5.4	0.47	0.14263	1	1.2	5.4	0.47	0.16751	1	7	26072073	26072931	859	43.31	1	processed_pseudogene	ring finger protein 170, pseudogene [Source:MGI Symbol;Acc:MGI:3645710]
ENSMUSG00000102970	Gm37349	1	4.8	0.47	0.145834	1	1	4.8	0.51	0.15176	1	1	191597647	191598270	624	44.71	1	TEC	predicted gene, 37349 [Source:MGI Symbol;Acc:MGI:5610577]
ENSMUSG00000103731	Gm17530	6.9	16.1	0.47	0.210462	0.944608	6.9	16.1	0.5	0.216526	0.988454	9	86546682	86547153	472	43.86	-1	TEC	predicted gene, 17530 [Source:MGI Symbol;Acc:MGI:4937164]
ENSMUSG00000103940	Gm38227	1.1	7.1	0.47	0.123685	1	1.1	7.1	0.52	0.130817	1	3	96263785	96265386	1602	45.51	1	TEC	predicted gene, 38227 [Source:MGI Symbol;Acc:MGI:5611455]
ENSMUSG00000106223	2400006E01Rik	1.6	6.6	0.47	0.153628	1	1.6	6.6	0.48	0.1835	1	3	41521247	41528474	874	42.38	-1	lincRNA	RIKEN cDNA 2400006E01 gene [Source:MGI Symbol;Acc:MGI:1925898]
ENSMUSG00000110441	Gm45790	0	4	0.47	0.0759281	1	0	4	0.45	0.112215	1	3	85435187	85466128	1629	45.89	-1	lincRNA	predicted gene 45790 [Source:MGI Symbol;Acc:MGI:5804905]
ENSMUSG00000110504	Gm45797	7.6	19.3	0.47	0.196212	1	7.6	19.3	0.49	0.214839	0.989876	8	94610777	94612697	1921	38.16	1	TEC	predicted gene 45797 [Source:MGI Symbol;Acc:MGI:5804912]
ENSMUSG00000111293	Gm34006	2.2	7.2	0.47	0.170199	1	2.2	7.2	0.55	0.148864	1	10	42861382	42864699	2204	44.09	-1	antisense	predicted gene, 34006 [Source:MGI Symbol;Acc:MGI:5593165]
ENSMUSG00000111951	Gm48755	6.6	12.5	0.47	0.215814	0.944608	6.6	12.5	0.52	0.202449	0.988454	10	9546246	9547521	1276	37.93	-1	TEC	predicted gene, 48755 [Source:MGI Symbol;Acc:MGI:6098434]
ENSMUSG00000112474	Gm46209	11.9	18.6	0.47	0.176601	0.912322	11.9	18.6	0.44	0.247939	0.92421	10	7458356	7458908	553	48.28	1	processed_pseudogene	predicted gene, 46209 [Source:MGI Symbol;Acc:MGI:5825846]
ENSMUSG00000113660	Gm5626	21	32	0.47	0.142797	0.793851	21	32	0.45	0.200647	0.856143	13	74533526	74534583	1058	53.4	1	processed_pseudogene	predicted gene 5626 [Source:MGI Symbol;Acc:MGI:3779505]
ENSMUSG00000004642	Slbp	149.2	217.9	0.46	0.0832874	0.690647	149.2	217.9	0.49	0.0741593	0.670377	5	33634952	33652574	6076	44.11	-1	protein_coding	stem-loop binding protein [Source:MGI Symbol;Acc:MGI:108402]
ENSMUSG00000005986	Ankrd13d	2.9	7.6	0.46	0.20203	1	2.9	7.6	0.5	0.208508	1	19	4270180	4283137	2460	49.24	-1	protein_coding	Ankyrin repeat domain-containing protein 13D [Source:UniProtKB/Swiss-Prot;Acc:Q6PD24]
ENSMUSG00000019467	Arhgef25	3	9.7	0.46	0.181356	1	3	9.7	0.64	0.112089	0.922189	10	127182525	127190083	3994	56.29	-1	protein_coding	Mus musculus Rho guanine nucleotide exchange factor (GEF) 25 (Arhgef25), transcript variant 3, mRNA. [Source:RefSeq mRNA;Acc:NM_001358557]
ENSMUSG00000020142	Slc1a4	327	469.2	0.46	0.0625383	0.631203	327	469.2	0.47	0.0754011	0.658279	11	20302180	20332713	3926	46.5	-1	protein_coding	solute carrier family 1 (glutamate/neutral amino acid transporter), member 4 [Source:MGI Symbol;Acc:MGI:2135601]
ENSMUSG00000020444	Guk1	273.7	384.7	0.46	0.0122681	0.305106	273.7	384.7	0.44	0.0335089	0.495966	11	59183875	59192212	1835	53.86	-1	protein_coding	guanylate kinase 1 [Source:HGNC Symbol;Acc:HGNC:4693]
ENSMUSG00000020457	Drg1	232.3	335.9	0.46	0.0601061	0.632143	232.3	335.9	0.51	0.0503519	0.582471	11	3187360	3266415	3460	42.81	-1	protein_coding	Developmentally-regulated GTP-binding protein 1 [Source:UniProtKB/Swiss-Prot;Acc:P32233]
ENSMUSG00000020808	Pimreg	7	17.7	0.46	0.200237	0.940542	7	17.7	0.5	0.215944	0.989946	11	72042032	72047370	2529	53.14	1	protein_coding	Protein PIMREG [Source:UniProtKB/Swiss-Prot;Acc:Q8BFY7]
ENSMUSG00000021013	Ttc8	26.9	44.6	0.46	0.199859	0.859453	26.9	44.6	0.47	0.225268	0.905327	12	98920574	98983238	3782	43.03	1	protein_coding	tetratricopeptide repeat domain 8 [Source:MGI Symbol;Acc:MGI:1923510]
ENSMUSG00000021676	Iqgap2	171	251.1	0.46	0.103133	0.728619	171	251.1	0.48	0.103055	0.730776	13	95627177	95891922	5771	44.1	-1	protein_coding	Ras GTPase-activating-like protein IQGAP2 [Source:UniProtKB/Swiss-Prot;Acc:Q3UQ44]
ENSMUSG00000024493	Lars	361.7	519.4	0.46	0.0477238	0.577081	361.7	519.4	0.49	0.0502257	0.56179	18	42202350	42262122	3856	42.36	-1	protein_coding	Leucine--tRNA ligase, cytoplasmic [Source:UniProtKB/Swiss-Prot;Acc:Q8BMJ2]
ENSMUSG00000025154	Arhgap19	10.4	20	0.46	0.226436	0.956331	10.4	20	0.4	0.331184	0.953028	19	41766588	41802084	5140	44.06	-1	protein_coding	Rho GTPase-activating protein 19 [Source:UniProtKB/Swiss-Prot;Acc:Q8BRH3]
ENSMUSG00000025479	Cyp2e1	51.9	94.9	0.46	0.224097	0.868591	51.9	94.9	0.27	0.502348	0.985989	7	140763739	140774987	2158	45.02	1	protein_coding	Cytochrome P450 2E1 [Source:UniProtKB/Swiss-Prot;Acc:Q05421]
ENSMUSG00000027274	Mkks	33.4	54.9	0.46	0.198531	0.85347	33.4	54.9	0.63	0.0770562	0.661884	2	136873780	136891389	3227	39.75	-1	protein_coding	McKusick-Kaufman/Bardet-Biedl syndromes putative chaperonin [Source:UniProtKB/Swiss-Prot;Acc:Q9JI70]
ENSMUSG00000028176	Lrrc7	0.7	4.7	0.46	0.134234	1	0.7	4.7	0.53	0.121216	1	3	158082891	158562221	9816	37.94	-1	protein_coding	leucine rich repeat containing 7 [Source:HGNC Symbol;Acc:HGNC:18531]
ENSMUSG00000028358	Zfp618	31.7	47.3	0.46	0.141135	0.791615	31.7	47.3	0.46	0.181261	0.827369	4	62965573	63139708	9352	46.57	1	protein_coding	zinc finger protein 618 [Source:MGI Symbol;Acc:MGI:1919950]
ENSMUSG00000028755	Cda	57.5	82.3	0.46	0.0747339	0.667822	57.5	82.3	0.4	0.1579	0.800269	4	138338424	138367992	1035	49.22	-1	protein_coding	Cytidine deaminase [Source:UniProtKB/Swiss-Prot;Acc:P56389]
ENSMUSG00000029610	Aimp2	32.2	49.8	0.46	0.158259	0.80869	32.2	49.8	0.54	0.102763	0.754405	5	143902704	143909847	1654	49.16	-1	protein_coding	Aminoacyl tRNA synthase complex-interacting multifunctional protein 2 [Source:UniProtKB/Swiss-Prot;Acc:Q8R010]
ENSMUSG00000032492	Pth1r	8	16.2	0.46	0.221674	0.95834	8	16.2	0.48	0.240284	0.991385	9	110722085	110747145	2925	55.04	-1	protein_coding	Parathyroid hormone/parathyroid hormone-related peptide receptor [Source:UniProtKB/Swiss-Prot;Acc:P41593]
ENSMUSG00000032555	Topbp1	142.3	204.6	0.46	0.0593441	0.622549	142.3	204.6	0.54	0.0314453	0.471341	9	103305215	103350428	11226	41.64	1	protein_coding	DNA topoisomerase 2-binding protein 1 [Source:UniProtKB/Swiss-Prot;Acc:Q6ZQF0]
ENSMUSG00000033066	Gas7	19.8	30.4	0.46	0.162061	0.913333	19.8	30.4	0.43	0.227936	0.92421	11	67455437	67688990	11342	47.37	1	protein_coding	growth arrest-specific protein 7 isoform d [Source:RefSeq peptide;Acc:NP_001264009]
ENSMUSG00000034807	Colgalt1	39.4	60.8	0.46	0.153055	0.862585	39.4	60.8	0.51	0.131477	0.765854	8	71610998	71624911	4326	52.51	1	protein_coding	Procollagen galactosyltransferase 1 [Source:UniProtKB/Swiss-Prot;Acc:Q8K297]
ENSMUSG00000036644	Tbc1d9b	174.6	250.9	0.46	0.0602038	0.620202	174.6	250.9	0.51	0.0416074	0.522711	11	50131396	50172785	6429	50.49	1	protein_coding	TBC1 domain family member 9B [Source:UniProtKB/Swiss-Prot;Acc:Q5SVR0]
ENSMUSG00000036768	Kif15	90.4	138.8	0.46	0.165035	0.81895	90.4	138.8	0.39	0.267218	0.911605	9	122951046	123018733	11020	40.44	1	protein_coding	Kinesin-like protein KIF15 [Source:UniProtKB/Swiss-Prot;Acc:Q6P9L6]
ENSMUSG00000037845	Fdxacb1	24.6	38.3	0.46	0.183959	0.916344	24.6	38.3	0.4	0.269213	0.91398	9	50768236	50773348	3256	44.18	1	protein_coding	Ferredoxin-fold anticodon-binding domain-containing [Source:UniProtKB/Swiss-Prot;Acc:Q3UY23]
ENSMUSG00000038037	Socs1	7.2	12.5	0.46	0.221185	0.962769	7.2	12.5	0.4	0.32223	1	16	10782240	10785536	2908	60.54	-1	protein_coding	Suppressor of cytokine signaling 1 [Source:UniProtKB/Swiss-Prot;Acc:O35716]
ENSMUSG00000039431	Mtmr7	54.4	78.7	0.46	0.0828735	0.687019	54.4	78.7	0.4	0.158004	0.803338	8	40551095	40634797	4454	42.76	-1	protein_coding	Myotubularin-related protein 7 [Source:UniProtKB/Swiss-Prot;Acc:Q9Z2C9]
ENSMUSG00000039628	Hs3st6	1.3	6.4	0.46	0.147985	1	1.3	6.4	0.7	0.0695662	1	17	24753003	24758683	1219	53.81	1	protein_coding	Heparan sulfate glucosamine 3-O-sulfotransferase 6 [Source:UniProtKB/Swiss-Prot;Acc:Q5GFD5]
ENSMUSG00000040435	Ppp1r15a	84.5	125.7	0.46	0.132231	0.776382	84.5	125.7	0.49	0.123776	0.757228	7	45522916	45526268	2937	54.52	-1	protein_coding	protein phosphatase 1, regulatory (inhibitor) subunit 15A [Source:MGI Symbol;Acc:MGI:1927072]
ENSMUSG00000041120	Nbl1	1.4	4.8	0.46	0.174209	1	1.4	4.8	0.45	0.21738	1	4	139082284	139092993	2033	55.26	-1	protein_coding	Neuroblastoma suppressor of tumorigenicity 1 [Source:UniProtKB/Swiss-Prot;Acc:Q61477]
ENSMUSG00000042446	Zmym4	83.3	124.2	0.46	0.107581	0.735807	83.3	124.2	0.53	0.0795331	0.667391	4	126861939	126968135	8139	38.65	-1	protein_coding	zinc finger, MYM-type 4 [Source:MGI Symbol;Acc:MGI:1915035]
ENSMUSG00000042487	Leo1	123.2	179.8	0.46	0.0887283	0.698186	123.2	179.8	0.51	0.0634703	0.635058	9	75441524	75466432	4846	46.14	1	protein_coding	RNA polymerase-associated protein LEO1 [Source:UniProtKB/Swiss-Prot;Acc:Q5XJE5]
ENSMUSG00000045215	Asxl3	5.3	10.3	0.46	0.225101	1	5.3	10.3	0.48	0.2416	0.991419	18	22344883	22530227	15533	38.96	1	protein_coding	Putative Polycomb group protein ASXL3 [Source:UniProtKB/Swiss-Prot;Acc:Q8C4A5]
ENSMUSG00000048191	Muc6	1.7	6.4	0.46	0.167273	1	1.7	6.4	0.51	0.167794	1	7	141633456	141655319	9361	53	-1	protein_coding	mucin-6 [Source:RefSeq peptide;Acc:NP_001316930]
ENSMUSG00000048200	Cracr2b	48.4	75.5	0.46	0.162139	0.813999	48.4	75.5	0.52	0.11885	0.747105	7	141461094	141466613	2764	57.63	1	protein_coding	EF-hand calcium-binding domain-containing protein 4A [Source:UniProtKB/Swiss-Prot;Acc:Q80ZJ8]
ENSMUSG00000048709	Gm8666	15.1	22.9	0.46	0.177347	0.928476	15.1	22.9	0.41	0.265562	0.935173	X	75475232	75475523	292	56.85	-1	processed_pseudogene	predicted gene 8666 [Source:MGI Symbol;Acc:MGI:3648747]
ENSMUSG00000049300	Prmt6	41.4	60.9	0.46	0.127403	0.767041	41.4	60.9	0.43	0.163938	0.808197	3	110246109	110250998	4197	46.58	-1	protein_coding	protein arginine N-methyltransferase 6 [Source:MGI Symbol;Acc:MGI:2139971]
ENSMUSG00000050288	Fzd2	11.1	20.7	0.46	0.226184	0.906092	11.1	20.7	0.48	0.241911	0.883056	11	102604396	102608058	3663	56.62	1	protein_coding	Frizzled-2 [Source:UniProtKB/Swiss-Prot;Acc:Q9JIP6]
ENSMUSG00000051113	Fam71e1	3	8.3	0.46	0.197656	0.985239	3	8.3	0.5	0.202198	0.982173	7	44496581	44501486	2154	52.45	1	protein_coding	Mus musculus family with sequence similarity 71, member E1 (Fam71e1), transcript variant 2, mRNA. [Source:RefSeq mRNA;Acc:NM_001357650]
ENSMUSG00000053560	Ier2	459.4	655.5	0.46	0.0436628	0.53911	459.4	655.5	0.57	0.0102165	0.279197	8	84661331	84662852	1522	60.91	-1	protein_coding	Immediate early response 2 protein [Source:UniProtKB/Swiss-Prot;Acc:P17950]
ENSMUSG00000054293	P2ry10b	1	7.6	0.46	0.120574	1	1	7.6	0.49	0.133707	1	X	107148927	107173661	3465	34.31	1	protein_coding	purinergic receptor P2Y, G-protein coupled 10B [Source:MGI Symbol;Acc:MGI:2441814]
ENSMUSG00000056116	H2-T22	81.2	122.4	0.46	0.133853	0.779277	81.2	122.4	0.52	0.108482	0.730776	17	36037128	36042747	3414	50.12	-1	protein_coding	histocompatibility 2, T region locus 22 [Source:MGI Symbol;Acc:MGI:95956]
ENSMUSG00000059183	Mtfmt	36.7	56	0.46	0.148497	0.803263	36.7	56	0.5	0.150036	0.808197	9	65435782	65453054	3655	44.68	1	protein_coding	mitochondrial methionyl-tRNA formyltransferase [Source:MGI Symbol;Acc:MGI:1916856]
ENSMUSG00000065158	Gm25483	0.8	4.3	0.46	0.140229	1	0.8	4.3	0.48	0.156543	1	13	12589565	12589791	227	54.19	1	snoRNA	predicted gene, 25483 [Source:MGI Symbol;Acc:MGI:5455260]
ENSMUSG00000068039	Tcp1	459.4	639.1	0.46	0.000833518	0.0619235	459.4	639.1	0.45	0.00627116	0.215678	17	12915701	12925067	5030	42.68	1	protein_coding	T-complex protein 1 subunit alpha [Source:UniProtKB/Swiss-Prot;Acc:P11983]
ENSMUSG00000068341	Reg3d	0.7	3.6	0.46	0.148098	1	0.7	3.6	0.45	0.18279	1	6	78375874	78378865	782	41.44	-1	protein_coding	regenerating islet-derived 3 delta [Source:MGI Symbol;Acc:MGI:1353426]
ENSMUSG00000069456	Rdh16	5.4	12.1	0.46	0.215148	0.990501	5.4	12.1	0.5	0.218626	0.993759	10	127801152	127846565	6217	43.2	1	protein_coding	retinol dehydrogenase 16 [Source:MGI Symbol;Acc:MGI:1201375]
ENSMUSG00000072598	Ang6	328.4	480.5	0.46	0.10885	0.745488	328.4	480.5	0.53	0.0749266	0.657163	14	44001826	44002269	444	44.14	-1	protein_coding	angiogenin, ribonuclease A family, member 6 [Source:MGI Symbol;Acc:MGI:3528602]
ENSMUSG00000074034	Gm5921	4.9	9.2	0.46	0.229288	0.990501	4.9	9.2	0.43	0.289566	1	9	115437700	115438581	882	57.82	-1	processed_pseudogene	predicted gene 5921 [Source:MGI Symbol;Acc:MGI:3648968]
ENSMUSG00000079580	Tmem217	0	4.4	0.46	0.0813187	1	0	4.4	0.47	0.102608	1	17	29526033	29549593	904	46.04	-1	protein_coding	transmembrane protein 217 [Source:MGI Symbol;Acc:MGI:3646280]
ENSMUSG00000081281	Gm6274	110.2	155.2	0.46	0.0319889	0.47344	110.2	155.2	0.44	0.0672769	0.645441	X	36668217	36669013	797	46.93	1	processed_pseudogene	predicted gene 6274 [Source:MGI Symbol;Acc:MGI:3645367]
ENSMUSG00000082292	Gm12250	10	24.3	0.46	0.208972	0.890543	10	24.3	0.43	0.27654	0.905665	11	58187739	58189012	1274	46.15	1	processed_pseudogene
ENSMUSG00000082875	Gm12598	4.8	10.4	0.46	0.22511	1	4.8	10.4	0.5	0.222977	0.988454	11	11312433	11313262	830	40.6	1	processed_pseudogene	predicted gene 12598 [Source:MGI Symbol;Acc:MGI:3650482]
ENSMUSG00000084055	Gm12004	0.5	3.4	0.46	0.131137	1	0.5	3.4	0.45	0.167206	1	11	12997666	12998383	718	51.25	1	processed_pseudogene	predicted gene 12004 [Source:MGI Symbol;Acc:MGI:3651315]
ENSMUSG00000086382	Chrna1os	2.1	7.4	0.46	0.166291	1	2.1	7.4	0.48	0.187907	1	2	73584850	73589208	701	44.8	1	antisense	cholinergic receptor, nicotinic, alpha polypeptide 1 (muscle), opposite strand [Source:MGI Symbol;Acc:MGI:3651120]
ENSMUSG00000089661	Mia	6.3	11.6	0.46	0.219214	0.944608	6.3	11.6	0.5	0.219499	0.991385	7	27179742	27181157	994	48.87	-1	protein_coding	melanoma inhibitory activity [Source:MGI Symbol;Acc:MGI:109615]
ENSMUSG00000091345	Col6a5	6.2	14.6	0.46	0.209786	0.95834	6.2	14.6	0.5	0.212949	0.98668	9	105856078	105960643	9413	43.98	-1	protein_coding	collagen type VI alpha 5 chain [Source:HGNC Symbol;Acc:HGNC:26674]
ENSMUSG00000092335	Zfp977	1.1	6.2	0.46	0.131022	1	1.1	6.2	0.52	0.129441	1	7	42579783	42592547	1425	39.44	-1	protein_coding	zinc finger protein 977 [Source:MGI Symbol;Acc:MGI:3645327]
ENSMUSG00000092564	BC051226	2.6	5.5	0.46	0.222641	1	2.6	5.5	0.45	0.26648	1	17	33908182	33909317	979	58.8	-1	antisense	cDNA sequence BC051226 [Source:MGI Symbol;Acc:MGI:3039585]
ENSMUSG00000097195	Snhg5	211.1	305.8	0.46	0.0917654	0.711681	211.1	305.8	0.43	0.134173	0.766502	9	88521050	88522929	1730	42.34	-1	processed_transcript
ENSMUSG00000098912	1500004A13Rik	10.8	17.8	0.46	0.202521	0.944501	10.8	17.8	0.45	0.260304	0.997408	3	88782943	88832547	13854	44.24	-1	processed_transcript	RIKEN cDNA 1500004A13 gene [Source:MGI Symbol;Acc:MGI:2442808]
ENSMUSG00000099413	Gm17767	6.8	22.2	0.46	#N/A	#N/A	6.8	22.2	0.62	0.118554	0.928684	1	51507086	51596718	3979	41.13	-1	lincRNA	predicted gene, 17767 [Source:MGI Symbol;Acc:MGI:5009931]
ENSMUSG00000103224	Gm2077	5.1	8.9	0.46	0.223236	0.990501	5.1	8.9	0.44	0.281284	1	3	3939144	3939462	319	35.11	1	processed_pseudogene	predicted gene 2077 [Source:MGI Symbol;Acc:MGI:3780244]
ENSMUSG00000104713	Gbp6	1.6	10.2	0.46	0.126083	1	1.6	10.2	0.46	0.168394	0.97826	5	105270702	105293698	5954	40.34	-1	protein_coding
ENSMUSG00000105257	Gm43144	0	4	0.46	0.0814777	1	0	4	0.45	0.112727	1	5	96940297	96940781	485	45.57	1	TEC	predicted gene 43144 [Source:MGI Symbol;Acc:MGI:5663281]
ENSMUSG00000107576	Gm44093	1.6	5	0.46	0.178893	1	1.6	5	0.42	0.259569	1	6	86961641	86963442	1802	40.79	1	TEC	predicted gene, 44093 [Source:MGI Symbol;Acc:MGI:5690485]
ENSMUSG00000115808	AC133101.1	14.2	22.5	0.46	0.183506	0.922462	14.2	22.5	0.46	0.223658	0.871624	15	34268527	34269829	1199	42.13	-1	processed_pseudogene
ENSMUSG00000001700	Gramd3	208.1	305.9	0.45	0.126637	0.765581	208.1	305.9	0.56	0.0489239	0.569718	18	56432132	56503792	2605	44.17	1	protein_coding	GRAM domain containing 2B [Source:HGNC Symbol;Acc:HGNC:24911]
ENSMUSG00000002257	Def6	0.7	3.8	0.45	0.142027	1	0.7	3.8	0.43	0.187681	1	17	28207778	28228608	2524	50.73	1	protein_coding	DEF6, guanine nucleotide exchange factor [Source:HGNC Symbol;Acc:HGNC:2760]
ENSMUSG00000002768	Mea1	102.7	154.7	0.45	0.152747	0.80353	102.7	154.7	0.51	0.11259	0.745783	17	46681137	46683105	840	54.44	1	protein_coding	Male-enhanced antigen 1 [Source:UniProtKB/Swiss-Prot;Acc:Q64327]
ENSMUSG00000002900	Lamb1	127.7	192.9	0.45	0.156739	0.806164	127.7	192.9	0.47	0.157938	0.800269	12	31265234	31329644	9917	45.81	1	protein_coding	Laminin subunit beta-1 [Source:UniProtKB/Swiss-Prot;Acc:P02469]
ENSMUSG00000003868	Ruvbl2	84	117.2	0.45	0.0329051	0.47344	84	117.2	0.39	0.09274	0.703802	7	45421760	45438096	2902	54.18	-1	protein_coding	RuvB-like protein 2 [Source:MGI Symbol;Acc:MGI:1342299]
ENSMUSG00000005893	Nr2c2	77.4	118.1	0.45	0.162526	0.82254	77.4	118.1	0.51	0.126453	0.757473	6	92091390	92174294	14935	41.02	1	protein_coding	nuclear receptor subfamily 2, group C, member 2 [Source:MGI Symbol;Acc:MGI:1352466]
ENSMUSG00000010067	Rassf1	11.3	21.6	0.45	0.230159	0.949794	11.3	21.6	0.49	0.227613	0.894451	9	107551555	107562267	5845	49.97	1	protein_coding	Ras association (RalGDS/AF-6) domain family member 1 [Source:MGI Symbol;Acc:MGI:1928386]
ENSMUSG00000011179	Odc1	82.5	117.3	0.45	0.0431325	0.537588	82.5	117.3	0.48	0.053145	0.598895	12	17544794	17551505	3405	47.42	1	protein_coding	ornithine decarboxylase, structural 1 [Source:MGI Symbol;Acc:MGI:97402]
ENSMUSG00000012429	Mplkip	72.7	103.4	0.45	0.0689726	0.650216	72.7	103.4	0.37	0.156781	0.808197	13	17695192	17699748	4503	40.27	1	protein_coding	M-phase specific PLK1 intereacting protein [Source:MGI Symbol;Acc:MGI:1913558]
ENSMUSG00000015095	Fbxw5	53.6	79.2	0.45	0.114127	0.745488	53.6	79.2	0.48	0.112122	0.757228	2	25500750	25505471	3052	57.03	1	protein_coding	Mus musculus F-box and WD-40 domain protein 5 (Fbxw5), transcript variant 3, mRNA. [Source:RefSeq mRNA;Acc:NM_001356408]
ENSMUSG00000015120	Ube2i	48.6	74.4	0.45	0.168839	0.82521	48.6	74.4	0.5	0.148044	0.800269	17	25261916	25274622	5474	51.37	-1	protein_coding	ubiquitin-conjugating enzyme E2I [Source:MGI Symbol;Acc:MGI:107365]
ENSMUSG00000016206	H2-M3	23.4	35.7	0.45	0.1678	0.87647	23.4	35.7	0.48	0.170216	0.846047	17	37270220	37274484	1438	46.66	1	protein_coding
ENSMUSG00000019948	Actr6	45	67.3	0.45	0.169443	0.877238	45	67.3	0.46	0.195791	0.838692	10	89711971	89732295	1983	41.58	-1	protein_coding	ARP6 actin related protein 6 homolog [Source:HGNC Symbol;Acc:HGNC:24025]
ENSMUSG00000021556	Golm1	117	180.8	0.45	0.187495	0.847438	117	180.8	0.49	0.155816	0.798446	13	59634626	59675811	4424	48.11	-1	protein_coding	golgi membrane protein 1 [Source:MGI Symbol;Acc:MGI:1917329]
ENSMUSG00000021720	Rnf180	4.9	42.5	0.45	0.117182	0.852584	4.9	42.5	0.48	0.141974	0.812042	13	105130001	105294815	5579	40.92	-1	protein_coding	E3 ubiquitin-protein ligase RNF180 [Source:UniProtKB/Swiss-Prot;Acc:Q3U827]
ENSMUSG00000021811	Dnajc9	109.1	159.9	0.45	0.107042	0.735807	109.1	159.9	0.56	0.0427281	0.540984	14	20384638	20388910	2377	45.87	-1	protein_coding	DnaJ homolog subfamily C member 9 [Source:UniProtKB/Swiss-Prot;Acc:Q91WN1]
ENSMUSG00000021916	Glt8d1	60.9	99.7	0.45	0.216522	0.863264	60.9	99.7	0.47	0.228501	0.881162	14	31001400	31011991	3331	44.96	1	protein_coding	Glycosyltransferase 8 domain-containing protein 1 [Source:UniProtKB/Swiss-Prot;Acc:Q6NSU3]
ENSMUSG00000023912	Slc25a27	5.3	13.6	0.45	0.207154	0.944501	5.3	13.6	0.47	0.224305	0.989946	17	43641900	43667015	2687	43.92	-1	protein_coding	solute carrier family 25, member 27 [Source:MGI Symbol;Acc:MGI:1921261]
ENSMUSG00000023965	Fbxl17	52.5	75.5	0.45	0.0811953	0.688739	52.5	75.5	0.42	0.137206	0.808038	17	63057452	63500017	5526	41.21	-1	protein_coding	F-box/LRR-repeat protein 17 [Source:UniProtKB/Swiss-Prot;Acc:Q9QZN1]
ENSMUSG00000024805	Pcgf5	104.1	149.3	0.45	0.0705785	0.652758	104.1	149.3	0.43	0.111681	0.738697	19	36348309	36460970	12629	42.95	1	protein_coding	Polycomb group RING finger protein 5 [Source:UniProtKB/Swiss-Prot;Acc:Q3UK78]
ENSMUSG00000025017	Pik3ap1	1.7	7.3	0.45	0.16125	1	1.7	7.3	0.46	0.192342	1	19	41274218	41385070	2615	46.48	-1	protein_coding	phosphoinositide-3-kinase adaptor protein 1 [Source:MGI Symbol;Acc:MGI:1933177]
ENSMUSG00000025395	Prim1	120.4	170.6	0.45	0.0405644	0.529008	120.4	170.6	0.5	0.0379055	0.502029	10	128015168	128030037	3868	43.36	1	protein_coding	DNA primase, p49 subunit [Source:MGI Symbol;Acc:MGI:97757]
ENSMUSG00000026883	Dab2ip	62.8	89.2	0.45	0.0597468	0.619019	62.8	89.2	0.45	0.0927479	0.695143	2	35558266	35730994	8366	51.75	1	protein_coding	Disabled homolog 2-interacting protein [Source:UniProtKB/Swiss-Prot;Acc:Q3UHC7]
ENSMUSG00000026889	Rbm18	147.3	211.4	0.45	0.093992	0.707399	147.3	211.4	0.46	0.10579	0.737636	2	36116079	36136773	5834	42.93	-1	protein_coding	Mus musculus RNA binding motif protein 18 (Rbm18), transcript variant 5, mRNA. [Source:RefSeq mRNA;Acc:NM_001355579]
ENSMUSG00000028185	Dnase2b	0.8	6.7	0.45	0.124198	1	0.8	6.7	0.55	0.104602	1	3	146580985	146615596	2790	43.22	-1	protein_coding	Deoxyribonuclease-2-beta [Source:UniProtKB/Swiss-Prot;Acc:Q9QY48]
ENSMUSG00000028347	Tmeff1	55.1	83.3	0.45	0.179451	0.836292	55.1	83.3	0.37	0.291731	0.938356	4	48585174	48663131	2549	43.85	1	protein_coding	Mus musculus transmembrane protein with EGF-like and two follistatin-like domains 1 (Tmeff1), transcript variant 1, mRNA. [Source:RefSeq mRNA;Acc:NM_001356272]
ENSMUSG00000028873	Cdca8	90.1	129.1	0.45	0.0851153	0.690647	90.1	129.1	0.4	0.148461	0.808114	4	124918465	124939311	5177	47.11	-1	protein_coding	Borealin [Source:UniProtKB/Swiss-Prot;Acc:Q8BHX3]
ENSMUSG00000031981	Capn9	44	64.6	0.45	0.109965	0.743379	44	64.6	0.49	0.112023	0.767805	8	124576111	124618731	2414	47.37	1	protein_coding	Calpain-9 [Source:UniProtKB/Swiss-Prot;Acc:Q9D805]
ENSMUSG00000032175	Tyk2	33.5	48.8	0.45	0.113112	0.744362	33.5	48.8	0.47	0.136775	0.808038	9	21104068	21131243	6865	50.63	-1	protein_coding	tyrosine kinase 2 [Source:MGI Symbol;Acc:MGI:1929470]
ENSMUSG00000032396	Dis3l	58.5	88.8	0.45	0.150164	0.803263	58.5	88.8	0.47	0.163623	0.838692	9	64306756	64341288	5458	46.05	-1	protein_coding	DIS3-like exonuclease 1 [Source:UniProtKB/Swiss-Prot;Acc:Q8C0S1]
ENSMUSG00000032606	Nicn1	29.8	45.2	0.45	0.164621	0.916063	29.8	45.2	0.46	0.194799	0.870542	9	108290429	108296498	2835	47.31	1	protein_coding	Nicolin-1 [Source:UniProtKB/Swiss-Prot;Acc:Q9CQM0]
ENSMUSG00000034157	Cipc	75.5	121.3	0.45	0.204884	0.859453	75.5	121.3	0.58	0.0951204	0.696196	12	86947043	86965362	4863	45.72	1	protein_coding	CLOCK-interacting pacemaker [Source:UniProtKB/Swiss-Prot;Acc:Q8R0W1]
ENSMUSG00000034738	Nostrin	113.3	162.8	0.45	0.0912925	0.700862	113.3	162.8	0.41	0.142411	0.788575	2	69135800	69189330	1888	42.58	1	protein_coding	Nostrin [Source:UniProtKB/Swiss-Prot;Acc:Q6WKZ7]
ENSMUSG00000034990	Otoa	0.9	3.8	0.45	0.161517	1	0.9	3.8	0.45	0.197785	1	7	121081650	121163097	8439	46.23	1	protein_coding	Otoancorin [Source:UniProtKB/Swiss-Prot;Acc:Q8K561]
ENSMUSG00000036822	Topors	156.7	224.7	0.45	0.0700123	0.65146	156.7	224.7	0.45	0.09968	0.735556	4	40259601	40269850	3856	44.69	-1	protein_coding	E3 ubiquitin-protein ligase Topors [Source:UniProtKB/Swiss-Prot;Acc:Q80Z37]
ENSMUSG00000039262	Prrc2b	156.8	218.5	0.45	0.0352412	0.491689	156.8	218.5	0.38	0.0896352	0.694823	2	32151082	32234537	11262	51.51	1	protein_coding	Protein PRRC2B [Source:UniProtKB/Swiss-Prot;Acc:Q7TPM1]
ENSMUSG00000039615	Stub1	37.5	54.9	0.45	0.109577	0.739214	37.5	54.9	0.51	0.0960967	0.740883	17	25830636	25833361	1672	59.28	-1	protein_coding	STIP1 homology and U-Box containing protein 1 [Source:MGI Symbol;Acc:MGI:1891731]
ENSMUSG00000040044	Orc3	99.8	142.1	0.45	0.0603931	0.621002	99.8	142.1	0.54	0.0201098	0.392362	4	34570796	34614944	6088	39.43	-1	protein_coding	Origin recognition complex subunit 3 [Source:UniProtKB/Swiss-Prot;Acc:Q9JK30]
ENSMUSG00000040818	Dennd6a	176.7	267.8	0.45	0.166502	0.82254	176.7	267.8	0.51	0.136716	0.7699	14	26573856	26634322	8343	40.58	1	protein_coding	Protein DENND6A [Source:UniProtKB/Swiss-Prot;Acc:Q8BH65]
ENSMUSG00000041390	Mdfic	10.3	17.8	0.45	0.233129	1	10.3	17.8	0.44	0.276328	1	6	15720661	15802169	7427	39.63	1	protein_coding	MyoD family inhibitor domain-containing protein [Source:UniProtKB/Swiss-Prot;Acc:Q8BX65]
ENSMUSG00000042041	2010003K11Rik	1.3	6.2	0.45	0.154306	1	1.3	6.2	0.46	0.177142	1	19	4496790	4498583	1165	53.73	-1	protein_coding	Uncharacterized [Source:UniProtKB/Swiss-Prot;Acc:Q8VC23]
ENSMUSG00000048376	F2r	0.6	5.5	0.45	0.121671	1	0.6	5.5	0.46	0.148983	1	13	95601803	95618487	3336	46.98	-1	protein_coding	Proteinase-activated receptor 1 [Source:UniProtKB/Swiss-Prot;Acc:P30558]
ENSMUSG00000049092	Gpr137c	10.4	19.2	0.45	0.23596	0.946541	10.4	19.2	0.46	0.258709	0.904874	14	45219717	45282725	8776	38.28	1	protein_coding	G protein-coupled receptor 137C [Source:HGNC Symbol;Acc:HGNC:25445]
ENSMUSG00000051579	Tceal8	196.7	278.2	0.45	0.0445643	0.543658	196.7	278.2	0.48	0.0493342	0.558837	X	136168984	136172342	2563	46.06	-1	protein_coding	Transcription elongation factor A protein-like 8 [Source:UniProtKB/Swiss-Prot;Acc:Q9CZY2]
ENSMUSG00000052563	D930048N14Rik	2.2	6.3	0.45	0.203944	1	2.2	6.3	0.44	0.245204	1	11	51650954	51657681	3429	50.74	1	protein_coding
ENSMUSG00000054944	5330416C01Rik	1	4.2	0.45	0.157357	1	1	4.2	0.45	0.193838	1	13	97733498	97747411	3675	43.65	-1	lincRNA	RIKEN cDNA 5330416C01 gene [Source:MGI Symbol;Acc:MGI:2685378]
ENSMUSG00000055447	Cd47	612.5	851.2	0.45	0.0137624	0.32672	612.5	851.2	0.4	0.0406431	0.516255	16	49800533	49915010	6276	41.36	1	protein_coding	Leukocyte surface antigen CD47 [Source:UniProtKB/Swiss-Prot;Acc:Q61735]
ENSMUSG00000059659	Gm10069	6.1	10.9	0.45	0.23182	1	6.1	10.9	0.45	0.274068	1	6	128438757	128503281	4370	45.19	1	antisense
ENSMUSG00000059842	Zfp341	8.7	16.3	0.45	0.232268	0.951217	8.7	16.3	0.6	0.140758	0.952441	2	154613297	154646821	3299	48.94	1	protein_coding	zinc finger protein 341 [Source:MGI Symbol;Acc:MGI:2682937]
ENSMUSG00000063586	Gm5513	2.9	6.3	0.45	0.226945	1	2.9	6.3	0.39	0.329297	1	19	14959549	14960766	1218	47.62	-1	processed_pseudogene	predicted pseudogene 5513 [Source:MGI Symbol;Acc:MGI:3645437]
ENSMUSG00000065208	Gm24616	21.9	37.2	0.45	0.225739	0.922462	21.9	37.2	0.6	0.117988	0.775496	16	23111617	23111755	139	37.41	1	snoRNA	predicted gene, 24616 [Source:MGI Symbol;Acc:MGI:5454393]
ENSMUSG00000067150	Xpo5	31.2	47.6	0.45	0.173886	0.831815	31.2	47.6	0.45	0.207688	0.856143	17	46202855	46242299	3709	46.39	1	protein_coding	exportin 5 [Source:MGI Symbol;Acc:MGI:1913789]
ENSMUSG00000067795	4930444P10Rik	0.3	3.6	0.45	0.107338	1	0.3	3.6	0.43	0.149113	1	1	16065979	16093325	2063	44.55	-1	protein_coding	RIKEN cDNA 4930444P10 gene [Source:MGI Symbol;Acc:MGI:1923049]
ENSMUSG00000069044	Usp9y	0	2.9	0.45	0.0864029	1	0	2.9	0.44	0.118701	1	Y	1298961	1459782	8094	36.39	-1	protein_coding	ubiquitin specific peptidase 9, Y chromosome [Source:MGI Symbol;Acc:MGI:1313274]
ENSMUSG00000074067	Gm10619	1.1	3.7	0.45	0.176982	1	1.1	3.7	0.42	0.233023	1	7	73781429	73816503	5495	45.67	-1	lincRNA
ENSMUSG00000077274	Gm22786	0.5	3	0.45	0.145792	1	0.5	3	0.45	0.175339	1	1	86087301	86087422	122	48.36	1	snoRNA	predicted gene, 22786 [Source:MGI Symbol;Acc:MGI:5452563]
ENSMUSG00000078784	1810022K09Rik	164.4	231.4	0.45	0.0274742	0.438501	164.4	231.4	0.47	0.0376382	0.499551	3	14606284	14611285	1753	37.94	-1	protein_coding	Mus musculus RIKEN cDNA 1810022K09 (1810022K09Rik), transcript variant 1, mRNA. [Source:RefSeq mRNA;Acc:NM_001347206]
ENSMUSG00000080844	Gm14107	8	13.2	0.45	0.223968	1	8	13.2	0.41	0.302394	1	2	147642848	147643177	330	49.7	-1	processed_pseudogene	predicted gene 14107 [Source:MGI Symbol;Acc:MGI:3651301]
ENSMUSG00000081392	Gm11668	0.8	7	0.45	0.121089	1	0.8	7	0.48	0.132178	1	11	109007651	109008781	701	45.98	1	processed_pseudogene	predicted gene 11668 [Source:MGI Symbol;Acc:MGI:3650166]
ENSMUSG00000082044	Snrpert	213.4	301.3	0.45	0.0643406	0.633296	213.4	301.3	0.39	0.121152	0.757473	2	131322088	131322366	279	41.58	-1	processed_pseudogene	small nuclear ribonucleoprotein E, pseudogene [Source:MGI Symbol;Acc:MGI:3650419]
ENSMUSG00000082585	Gm15387	1.1	3.3	0.45	0.192419	1	1.1	3.3	0.42	0.252698	1	15	74093686	74094333	648	46.6	-1	processed_pseudogene	predicted gene 15387 [Source:MGI Symbol;Acc:MGI:3705374]
ENSMUSG00000083798	Gm14584	8.7	14.2	0.45	0.214834	0.944608	8.7	14.2	0.45	0.246569	0.997408	X	53418331	53418967	637	40.97	1	processed_pseudogene	predicted gene 14584 [Source:MGI Symbol;Acc:MGI:3705780]
ENSMUSG00000083892	Gm1848	15.7	25.8	0.45	0.213453	0.944608	15.7	25.8	0.42	0.28154	0.943681	X	21146844	21147640	789	43.54	1	processed_pseudogene	predicted gene 1848 [Source:MGI Symbol;Acc:MGI:3037706]
ENSMUSG00000083962	Gm15707	1	3.6	0.45	0.184136	1	1	3.6	0.42	0.233439	1	6	145315613	145316608	996	50.1	-1	processed_pseudogene	predicted gene 15707 [Source:MGI Symbol;Acc:MGI:3783147]
ENSMUSG00000086040	Wipf3	16.9	28.5	0.45	0.225667	0.956023	16.9	28.5	0.61	0.108031	0.747917	6	54429603	54503768	7114	46.13	1	protein_coding	WAS/WASL interacting protein family, member 3 [Source:MGI Symbol;Acc:MGI:3044681]
ENSMUSG00000089809	Rasgef1b	19.9	34.5	0.45	0.225456	0.875564	19.9	34.5	0.36	0.375437	0.979708	5	99217426	99729065	13805	43.82	-1	protein_coding	Ras-GEF domain-containing family member 1B [Source:UniProtKB/Swiss-Prot;Acc:Q8JZL7]
ENSMUSG00000095025	Gm24018	6.1	11.7	0.45	0.236886	1	6.1	11.7	0.56	0.167417	0.967166	13	17809591	17809697	107	44.86	-1	snRNA	predicted gene, 24018 [Source:MGI Symbol;Acc:MGI:5453795]
ENSMUSG00000095385	D630033O11Rik	0.5	2.8	0.45	0.143229	1	0.5	2.8	0.44	0.182013	1	9	43243599	43280076	3746	49.08	1	lincRNA	RIKEN cDNA D630033O11 gene [Source:MGI Symbol;Acc:MGI:2685434]
ENSMUSG00000097530	Kansl2-ps	5.8	11.1	0.45	0.238015	0.990501	5.8	11.1	0.48	0.242393	0.997178	7	72672818	72674278	1461	52.09	1	processed_pseudogene	KAT8 regulatory NSL complex subunit 2, pseudogene [Source:MGI Symbol;Acc:MGI:3648525]
ENSMUSG00000102428	Pcdhga12	16.8	27.8	0.45	0.217846	0.944608	16.8	27.8	0.56	0.148455	0.850498	18	37765580	37841873	6664	45.56	1	protein_coding
ENSMUSG00000103792	Gm3745	1.9	6.5	0.45	0.185254	1	1.9	6.5	0.47	0.202677	1	3	87968186	87968606	421	55.82	1	processed_pseudogene	predicted gene 3745 [Source:MGI Symbol;Acc:MGI:3781920]
ENSMUSG00000104693	Gm42941	4	10.2	0.45	0.214414	0.990501	4	10.2	0.48	0.22714	0.994375	3	101595810	101597130	1321	44.59	-1	sense_intronic	predicted gene 42941 [Source:MGI Symbol;Acc:MGI:5663078]
ENSMUSG00000105195	Gm43584	57.7	83.2	0.45	0.0920039	0.707399	57.7	83.2	0.5	0.0767641	0.661884	3	104753123	104773270	605	48.31	-1	processed_transcript	predicted gene 43584 [Source:MGI Symbol;Acc:MGI:5663721]
ENSMUSG00000109821	Gm6593	0.3	4.1	0.45	0.105599	1	0.3	4.1	0.53	0.0977073	1	7	104692298	104693432	1135	46.08	-1	processed_pseudogene	predicted gene 6593 [Source:MGI Symbol;Acc:MGI:3644209]
ENSMUSG00000110378	Gm45242	1.3	4.5	0.45	0.17836	1	1.3	4.5	0.42	0.232255	1	8	64945590	64947718	2129	50.87	-1	TEC	predicted gene 45242 [Source:MGI Symbol;Acc:MGI:5791078]
ENSMUSG00000110469	Gm10358	6.4	11.1	0.45	0.230405	1	6.4	11.1	0.42	0.305159	1	8	75405340	75406589	1250	55.52	-1	protein_coding
ENSMUSG00000113931	Gm5928	3.4	8.6	0.45	0.215347	0.990501	3.4	8.6	0.48	0.222991	0.988454	13	12425140	12425605	466	46.14	-1	processed_pseudogene	predicted gene 5928 [Source:MGI Symbol;Acc:MGI:3646762]
ENSMUSG00000114104	Gm47585	30.8	48.8	0.45	0.194258	0.902648	30.8	48.8	0.58	0.0943474	0.706632	13	63273600	63275911	2312	41.22	1	TEC	predicted gene, 47585 [Source:MGI Symbol;Acc:MGI:6096625]
ENSMUSG00000114138	Gm36423	2.6	7.1	0.45	0.209034	1	2.6	7.1	0.48	0.214568	1	13	9684226	9689544	1476	46.94	1	antisense	predicted gene, 36423 [Source:MGI Symbol;Acc:MGI:5595582]
ENSMUSG00000114569	Gm35215	2.6	14.1	0.45	0.144555	0.95789	2.6	14.1	0.55	0.121475	0.940294	13	98936763	98945916	1660	42.69	-1	lincRNA	predicted gene, 35215 [Source:MGI Symbol;Acc:MGI:5594374]
ENSMUSG00000115272	AC154806.1	1.5	6.3	0.45	0.163367	1	1.5	6.3	0.43	0.216562	1	14	43762152	43909143	1560	43.25	1	lincRNA
ENSMUSG00000000296	Tpd52l1	222	325.2	0.44	0.149468	0.806645	222	325.2	0.45	0.162985	0.804396	10	31332376	31445958	1323	40.19	-1	protein_coding	tumor protein D52-like 1 [Source:MGI Symbol;Acc:MGI:1298386]
ENSMUSG00000001751	Naglu	36.4	61.3	0.44	0.235284	0.877238	36.4	61.3	0.51	0.183922	0.827743	11	101070012	101077672	2658	53.06	1	protein_coding	alpha-N-acetylglucosaminidase (Sanfilippo disease IIIB) [Source:MGI Symbol;Acc:MGI:1351641]
ENSMUSG00000003526	Prodh	54.2	80.2	0.44	0.145437	0.798732	54.2	80.2	0.46	0.151331	0.795448	16	18060357	18090203	3461	51.19	-1	protein_coding	Proline dehydrogenase 1, mitochondrial [Source:UniProtKB/Swiss-Prot;Acc:Q9WU79]
ENSMUSG00000003541	Ier3	20.1	30.4	0.44	0.206529	0.862531	20.1	30.4	0.37	0.325947	0.936561	17	35821684	35822923	1131	54.52	1	protein_coding	immediate early response 3 [Source:HGNC Symbol;Acc:HGNC:5392]
ENSMUSG00000004319	Clcn3	805.8	1115.6	0.44	0.019955	0.396654	805.8	1115.6	0.45	0.0307044	0.46543	8	60910389	60983300	17071	37.97	-1	protein_coding	H(+)/Cl(-) exchange transporter 3 [Source:UniProtKB/Swiss-Prot;Acc:P51791]
ENSMUSG00000018554	Ybx2	1.8	5.3	0.44	0.204344	1	1.8	5.3	0.49	0.202646	1	11	69935796	69941605	1885	56.88	1	protein_coding	Y box protein 2 [Source:MGI Symbol;Acc:MGI:1096372]
ENSMUSG00000019814	Ltv1	145.8	203.7	0.44	0.0467891	0.558364	145.8	203.7	0.44	0.069812	0.645441	10	13178140	13193168	2317	43.8	-1	protein_coding
ENSMUSG00000019817	Plagl1	7.1	13.6	0.44	0.243249	0.972264	7.1	13.6	0.46	0.25635	0.997408	10	13060504	13131694	7819	43.04	1	protein_coding
ENSMUSG00000020124	Usp15	329.6	467.7	0.44	0.0689814	0.650216	329.6	467.7	0.48	0.0642966	0.639712	10	123105006	123196995	16599	40.07	-1	protein_coding	ubiquitin specific peptidase 15 [Source:MGI Symbol;Acc:MGI:101857]
ENSMUSG00000020422	Tns3	224.3	318.9	0.44	0.103942	0.728619	224.3	318.9	0.32	0.217211	0.857506	11	8431652	8664535	11182	47.65	-1	protein_coding	Tensin-3 [Source:UniProtKB/Swiss-Prot;Acc:Q5SSZ5]
ENSMUSG00000020681	Ace	2.9	7.4	0.44	0.215651	1	2.9	7.4	0.45	0.246624	1	11	105967945	105989964	5287	52.61	1	protein_coding	angiotensin I converting enzyme (peptidyl-dipeptidase A) 1 [Source:MGI Symbol;Acc:MGI:87874]
ENSMUSG00000021379	Id4	17.6	34.7	0.44	0.24752	0.953496	17.6	34.7	0.46	0.253045	0.925073	13	48261228	48266026	3849	46.34	1	protein_coding	DNA-binding protein inhibitor ID-4 [Source:UniProtKB/Swiss-Prot;Acc:P41139]
ENSMUSG00000022543	4930451G09Rik	0.5	3.4	0.44	0.139254	1	0.5	3.4	0.43	0.179872	1	16	4964289	4978962	3444	49.09	1	transcribed_unitary_pseudogene	RIKEN cDNA 4930451G09 gene [Source:MGI Symbol;Acc:MGI:1921934]
ENSMUSG00000022971	Ifnar2	38.3	64.5	0.44	0.229317	0.873029	38.3	64.5	0.49	0.210948	0.856143	16	91372783	91405589	3329	45.54	1	protein_coding	interferon (alpha and beta) receptor 2 [Source:MGI Symbol;Acc:MGI:1098243]
ENSMUSG00000023806	Rsph3b	7.9	14.1	0.44	0.240728	0.95789	7.9	14.1	0.44	0.284367	1	17	6904716	6948356	1614	46.58	-1	protein_coding	Radial spoke head B [Source:UniProtKB/Swiss-Prot;Acc:Q9DA80]
ENSMUSG00000023980	Taf8	21.7	34.6	0.44	0.204629	0.859453	21.7	34.6	0.59	0.0909371	0.710816	17	47488050	47502287	2779	49.53	-1	protein_coding	Transcription initiation factor TFIID subunit 8 [Source:UniProtKB/Swiss-Prot;Acc:Q9EQH4]
ENSMUSG00000024795	Kif20b	116.1	165.5	0.44	0.110506	0.744362	116.1	165.5	0.35	0.184296	0.835656	19	34922361	34975745	6957	38.23	1	protein_coding	Kinesin-like protein KIF20B [Source:UniProtKB/Swiss-Prot;Acc:Q80WE4]
ENSMUSG00000024989	Cep55	40.8	65.4	0.44	0.229223	0.873029	40.8	65.4	0.3	0.412345	0.958403	19	38055025	38074425	2778	41.15	1	protein_coding	Centrosomal protein of 55 kDa [Source:UniProtKB/Swiss-Prot;Acc:Q8BT07]
ENSMUSG00000025008	Tctn3	13	20.7	0.44	0.230466	0.946541	13	20.7	0.45	0.258992	0.944229	19	40596446	40612233	3273	44.17	-1	protein_coding	Tectonic-3 [Source:UniProtKB/Swiss-Prot;Acc:Q8R2Q6]
ENSMUSG00000025855	Prkar1b	14.9	28.1	0.44	0.244443	0.95834	14.9	28.1	0.42	0.30191	0.949981	5	139017306	139150001	3810	49.65	-1	protein_coding	protein kinase, cAMP dependent regulatory, type I beta [Source:MGI Symbol;Acc:MGI:97759]
ENSMUSG00000026094	Stk17b	84.1	120.7	0.44	0.102904	0.728619	84.1	120.7	0.59	0.0272575	0.46543	1	53755506	53785224	5185	37.08	-1	protein_coding	Serine/threonine-protein kinase 17B [Source:UniProtKB/Swiss-Prot;Acc:Q8BG48]
ENSMUSG00000026116	Tmem131	155.5	219.2	0.44	0.0685778	0.648468	155.5	219.2	0.38	0.143572	0.790956	1	36792191	36943666	9413	43.66	-1	protein_coding	Transmembrane protein 131 [Source:UniProtKB/Swiss-Prot;Acc:O70472]
ENSMUSG00000026171	Rnf25	7.4	16.7	0.44	0.23702	0.955742	7.4	16.7	0.54	0.18515	0.986495	1	74593748	74601397	2181	47.37	-1	protein_coding	E3 ubiquitin-protein ligase RNF25 [Source:UniProtKB/Swiss-Prot;Acc:Q9QZR0]
ENSMUSG00000026509	Capn2	62.6	92.1	0.44	0.158532	0.814115	62.6	92.1	0.39	0.223172	0.86458	1	182467260	182517608	6345	49.87	-1	protein_coding	Calpain-2 catalytic subunit [Source:UniProtKB/Swiss-Prot;Acc:O08529]
ENSMUSG00000028651	Ppie	72.3	108.9	0.44	0.177337	0.832654	72.3	108.9	0.61	0.0273171	0.455505	4	123127115	123139951	1719	45.54	-1	protein_coding	Peptidyl-prolyl cis-trans isomerase E [Source:UniProtKB/Swiss-Prot;Acc:Q9QZH3]
ENSMUSG00000028909	Ptpru	5.9	10.8	0.44	0.244817	0.99248	5.9	10.8	0.39	0.341958	1	4	131768457	131838288	7113	51.82	-1	protein_coding	protein tyrosine phosphatase, receptor type, U [Source:MGI Symbol;Acc:MGI:1321151]
ENSMUSG00000028944	Prkag2	40.5	62.1	0.44	0.190147	0.850407	40.5	62.1	0.56	0.0863528	0.718876	5	24862744	25100642	6480	49.1	-1	protein_coding	protein kinase, AMP-activated, gamma 2 non-catalytic subunit [Source:MGI Symbol;Acc:MGI:1336153]
ENSMUSG00000029176	Anapc4	128.2	181.6	0.44	0.091676	0.700862	128.2	181.6	0.46	0.09804	0.715725	5	52834012	52867797	6081	40.75	1	protein_coding	Anaphase-promoting complex subunit 4 [Source:UniProtKB/Swiss-Prot;Acc:Q91W96]
ENSMUSG00000029250	Polr2b	108.1	153.6	0.44	0.107911	0.735871	108.1	153.6	0.48	0.10099	0.724395	5	77310147	77349324	4667	42.05	1	protein_coding	DNA-directed RNA polymerase II subunit RPB2 [Source:UniProtKB/Swiss-Prot;Acc:Q8CFI7]
ENSMUSG00000029404	Arl6ip4	113.6	164.2	0.44	0.118251	0.753999	113.6	164.2	0.48	0.0923236	0.690492	5	124116089	124118196	1442	58.02	1	protein_coding	ADP-ribosylation factor-like protein 6-interacting protein 4 [Source:UniProtKB/Swiss-Prot;Acc:Q9JM93]
ENSMUSG00000029578	Wipi2	138.9	199.8	0.44	0.0955242	0.708384	138.9	199.8	0.51	0.0561085	0.60687	5	142627698	142670588	10543	48.42	1	protein_coding	WD repeat domain, phosphoinositide interacting 2 [Source:MGI Symbol;Acc:MGI:1923831]
ENSMUSG00000030423	Pop4	52.4	78.1	0.44	0.176181	0.832654	52.4	78.1	0.44	0.209611	0.870542	7	38261996	38271423	2848	47.52	-1	protein_coding	processing of precursor 4, ribonuclease P/MRP family, (S. cerevisiae) [Source:MGI Symbol;Acc:MGI:1913411]
ENSMUSG00000031403	Dkc1	211.7	295.2	0.44	0.0324558	0.471924	211.7	295.2	0.43	0.0571328	0.612816	X	75095854	75109777	4121	41.89	1	protein_coding	H/ACA ribonucleoprotein complex subunit 4 [Source:UniProtKB/Swiss-Prot;Acc:Q9ESX5]
ENSMUSG00000032050	Rdx	26.1	53.8	0.44	0.241551	0.882671	26.1	53.8	0.43	0.287714	0.905665	9	52047173	52088735	4639	40	1	protein_coding	radixin [Source:MGI Symbol;Acc:MGI:97887]
ENSMUSG00000033307	Mif	159.7	229.2	0.44	0.109786	0.739725	159.7	229.2	0.41	0.166049	0.81984	10	75859353	75860240	745	62.27	-1	protein_coding	macrophage migration inhibitory factor (glycosylation-inhibiting factor) [Source:MGI Symbol;Acc:MGI:96982]
ENSMUSG00000033355	Rtp4	82.2	125.7	0.44	0.198846	0.859453	82.2	125.7	0.21	0.524014	0.981046	16	23520291	23614222	2131	42.57	1	protein_coding	Receptor-transporting protein 4 [Source:UniProtKB/Swiss-Prot;Acc:Q9ER80]
ENSMUSG00000035367	Rmi1	45.3	63.8	0.44	0.09011	0.69961	45.3	63.8	0.46	0.113366	0.757473	13	58402248	58411148	6568	43.95	1	protein_coding	RecQ-mediated genome instability protein 1 [Source:UniProtKB/Swiss-Prot;Acc:Q9D4G9]
ENSMUSG00000036944	Tmem71	5.9	12.1	0.44	0.244155	0.972264	5.9	12.1	0.46	0.258723	0.997408	15	66526212	66561103	2988	38.69	-1	protein_coding	transmembrane protein 71 [Source:MGI Symbol;Acc:MGI:2146049]
ENSMUSG00000037370	Enpp1	74.9	119.6	0.44	0.226836	0.869705	74.9	119.6	0.43	0.259524	0.904874	10	24637914	24712159	10257	41.98	-1	protein_coding	ectonucleotide pyrophosphatase/phosphodiesterase family member 1 isoform 3 [Source:RefSeq peptide;Acc:NP_001295258]
ENSMUSG00000037890	Wdr19	32.9	47.6	0.44	0.119359	0.7548	32.9	47.6	0.44	0.166046	0.808197	5	65199696	65260415	11278	44.22	1	protein_coding	WD repeat domain 19 [Source:MGI Symbol;Acc:MGI:2443231]
ENSMUSG00000038267	Slc22a23	70.3	101.2	0.44	0.114219	0.745488	70.3	101.2	0.47	0.119556	0.748373	13	34179158	34345182	6386	45.2	-1	protein_coding	Solute carrier family 22 member 23 [Source:UniProtKB/Swiss-Prot;Acc:Q3UHH2]
ENSMUSG00000038943	Prc1	45	70.4	0.44	0.209174	0.862531	45	70.4	0.4	0.291666	0.924605	7	80294450	80316259	8225	44.16	1	protein_coding	protein regulator of cytokinesis 1 [Source:MGI Symbol;Acc:MGI:1858961]
ENSMUSG00000040250	Ints13	103.5	145.9	0.44	0.0617131	0.628221	103.5	145.9	0.46	0.0765644	0.658279	6	146549632	146577835	8485	38.35	-1	protein_coding	Integrator complex subunit 13 [Source:UniProtKB/Swiss-Prot;Acc:Q8QZV7]
ENSMUSG00000040813	Tex264	67.7	103.7	0.44	0.179167	0.835477	67.7	103.7	0.59	0.0674808	0.658279	9	106658746	106685927	2874	51.87	-1	protein_coding	testis expressed gene 264 [Source:MGI Symbol;Acc:MGI:1096570]
ENSMUSG00000041360	Pum3	212.2	292.9	0.44	0.0110165	0.289266	212.2	292.9	0.4	0.0378532	0.510812	19	27388702	27429820	3462	42.65	-1	protein_coding	pumilio RNA binding family member 3 [Source:HGNC Symbol;Acc:HGNC:29676]
ENSMUSG00000041827	Oasl1	43.1	63.9	0.44	0.143329	0.794935	43.1	63.9	0.53	0.0877875	0.723427	5	114923240	114937915	2608	49.58	1	protein_coding	2'-5'-oligoadenylate synthase-like protein 1 [Source:UniProtKB/Swiss-Prot;Acc:Q8VI94]
ENSMUSG00000042185	Nfrkb	43	63.8	0.44	0.149279	0.803263	43	63.8	0.49	0.127425	0.758393	9	31386192	31421333	11277	44.74	1	protein_coding	Nuclear factor related to kappa-B-binding protein [Source:UniProtKB/Swiss-Prot;Acc:Q6PIJ4]
ENSMUSG00000043716	Rpl7	415.7	574	0.44	0.024726	0.430554	415.7	574	0.43	0.0473805	0.560415	1	16101295	16104662	2687	45.22	-1	protein_coding	ribosomal protein L7 [Source:MGI Symbol;Acc:MGI:98073]
ENSMUSG00000044252	Osbpl1a	51.1	74.1	0.44	0.119673	0.7548	51.1	74.1	0.56	0.0594172	0.635058	18	12755314	12941841	7392	43.16	-1	protein_coding	Oxysterol-binding protein-related protein 1 [Source:UniProtKB/Swiss-Prot;Acc:Q91XL9]
ENSMUSG00000044813	Shb	49.8	73	0.44	0.133304	0.77873	49.8	73	0.53	0.0876624	0.723427	4	45423278	45532470	3199	51.44	-1	protein_coding	SH2 domain-containing adapter protein B [Source:UniProtKB/Swiss-Prot;Acc:Q6PD21]
ENSMUSG00000047613	A430005L14Rik	92.8	137.6	0.44	0.153345	0.804308	92.8	137.6	0.55	0.0699907	0.64729	4	153957237	153961925	1552	52.68	1	protein_coding	UPF0688 [Source:UniProtKB/Swiss-Prot;Acc:Q80WR5]
ENSMUSG00000049303	Syt12	0	4.5	0.44	0.0914646	1	0	4.5	0.5	0.0896226	1	19	4445908	4477447	5539	49.63	-1	protein_coding	synaptotagmin XII [Source:MGI Symbol;Acc:MGI:2159601]
ENSMUSG00000049502	Dtx3l	92.9	137.4	0.44	0.167768	0.824711	92.9	137.4	0.4	0.235558	0.879133	16	35926511	35939151	5724	45.27	-1	protein_coding	E3 ubiquitin-protein ligase DTX3L [Source:UniProtKB/Swiss-Prot;Acc:Q3UIR3]
ENSMUSG00000050079	Rspry1	139.5	197.8	0.44	0.0544897	0.5953	139.5	197.8	0.52	0.0191127	0.40204	8	94601937	94660275	13211	40.6	1	protein_coding	ring finger and SPRY domain containing 1 [Source:MGI Symbol;Acc:MGI:1914860]
ENSMUSG00000051590	Map3k19	0.5	5.9	0.44	0.1173	1	0.5	5.9	0.55	0.0931545	1	1	127815253	127855031	4883	43.6	-1	protein_coding	Mitogen-activated protein kinase kinase kinase 19 [Source:UniProtKB/Swiss-Prot;Acc:E9Q3S4]
ENSMUSG00000053961	Ang5	1458.5	2259.3	0.44	0.209136	0.862531	1458.5	2259.3	0.38	0.344855	0.935173	14	43957069	43963072	700	42.62	1	protein_coding	angiogenin, ribonuclease A family, member 5 [Source:MGI Symbol;Acc:MGI:3528599]
ENSMUSG00000054115	Skp2	40.2	69.5	0.44	0.239094	0.934847	40.2	69.5	0.61	0.123489	0.788054	15	9111985	9155425	7875	42.69	-1	protein_coding	S-phase kinase-associated protein 2 (p45) [Source:MGI Symbol;Acc:MGI:1351663]
ENSMUSG00000054545	Ugt1a6a	2.8	9.9	0.44	0.188336	0.982305	2.8	9.9	0.63	0.110122	1	1	88134809	88218997	4312	42.59	1	protein_coding	UDP glucuronosyltransferase 1 family, polypeptide A6A [Source:MGI Symbol;Acc:MGI:2137698]
ENSMUSG00000055676	Gm5069	2.3	6.7	0.44	0.204697	1	2.3	6.7	0.42	0.28545	1	1	180326970	180330550	1328	47.58	-1	transcribed_processed_pseudogene	predicted pseudogene 5069 [Source:MGI Symbol;Acc:MGI:3644516]
ENSMUSG00000055827	Gsdmc3	2.9	14.6	0.44	0.152625	0.958796	2.9	14.6	0.5	0.153592	0.956972	15	63857724	63878558	2328	42.65	-1	protein_coding	Gasdermin-C3 [Source:UniProtKB/Swiss-Prot;Acc:Q8CB12]
ENSMUSG00000056124	B4galt6	230.6	338.5	0.44	0.149085	0.803263	230.6	338.5	0.35	0.266667	0.899619	18	20684599	20746404	5808	43.9	-1	protein_coding	Beta-1,4-galactosyltransferase 6 Glucosylceramide beta-1,4-galactosyltransferase [Source:UniProtKB/Swiss-Prot;Acc:Q9WVK5]
ENSMUSG00000057335	Cep170	34.2	53.3	0.44	0.203828	0.859453	34.2	53.3	0.48	0.188924	0.8656	1	176733653	176814067	18049	36.42	-1	protein_coding	Centrosomal protein of 170 kDa [Source:UniProtKB/Swiss-Prot;Acc:Q6A065]
ENSMUSG00000057666	Gapdh	6.8	12.4	0.44	0.242044	0.954807	6.8	12.4	0.44	0.279522	1	6	125161715	125166467	4133	54.89	-1	protein_coding	Glyceraldehyde-3-phosphate dehydrogenase [Source:UniProtKB/Swiss-Prot;Acc:P16858]
ENSMUSG00000058498	Rnf207	1	4.5	0.44	0.169142	1	1	4.5	0.51	0.1559	1	4	152307019	152318993	6331	53.77	-1	protein_coding	ring finger protein 207 [Source:MGI Symbol;Acc:MGI:2684989]
ENSMUSG00000060205	Olfr57	5.1	9.4	0.44	0.248323	0.990501	5.1	9.4	0.5	0.223141	0.989946	10	79028741	79036274	1709	38.15	1	protein_coding
ENSMUSG00000064565	Gm24145	0.8	3.2	0.44	0.175181	1	0.8	3.2	0.45	0.201025	1	16	11167105	11167267	163	47.85	-1	snRNA	predicted gene, 24145 [Source:MGI Symbol;Acc:MGI:5453922]
ENSMUSG00000064822	Gm24292	1.7	4.5	0.44	0.212039	1	1.7	4.5	0.43	0.248572	1	18	7835177	7835283	107	41.12	1	snRNA	predicted gene, 24292 [Source:MGI Symbol;Acc:MGI:5454069]
ENSMUSG00000064871	Snord58b	1.2	4.9	0.44	0.179301	1	1.2	4.9	0.47	0.188137	1	18	75001058	75001123	66	39.39	1	snoRNA	small nucleolar RNA, C/D box 58B [Source:MGI Symbol;Acc:MGI:3819545]
ENSMUSG00000065007	Gm26324	4.5	9.1	0.44	0.241663	1	4.5	9.1	0.53	0.192148	0.986495	11	99856308	99856414	107	44.86	1	snRNA	predicted gene, 26324 [Source:MGI Symbol;Acc:MGI:5456101]
ENSMUSG00000069301	Hist1h2ag	8.6	13.9	0.44	0.220884	1	8.6	13.9	0.45	0.253484	0.998216	13	22042460	22042944	485	64.33	-1	protein_coding	Histone H2A type 1-B [Source:UniProtKB/Swiss-Prot;Acc:C0HKE1]
ENSMUSG00000070737	Tmem35b	46.5	71.5	0.44	0.184192	0.841608	46.5	71.5	0.47	0.181548	0.844157	4	127123691	127129644	1910	47.98	1	protein_coding	Transmembrane protein 35B [Source:UniProtKB/Swiss-Prot;Acc:Q3U0Y2]
ENSMUSG00000073233	Gm9144	4.2	9.2	0.44	0.233019	0.990501	4.2	9.2	0.44	0.267662	1	12	7859900	7860907	1008	52.78	1	processed_pseudogene	predicted gene 9144 [Source:MGI Symbol;Acc:MGI:3643264]
ENSMUSG00000073753	Gm10571	4.4	10.3	0.44	0.229051	0.990501	4.4	10.3	0.44	0.267286	0.999136	4	129855071	129856710	1638	46.4	1	pseudogene	predicted gene 10571 [Source:MGI Symbol;Acc:MGI:3708701]
ENSMUSG00000081249	Gm11517	2.6	6.5	0.44	0.22843	1	2.6	6.5	0.46	0.238603	1	11	96795439	96795825	387	54.01	-1	processed_pseudogene	predicted gene 11517 [Source:MGI Symbol;Acc:MGI:3650064]
ENSMUSG00000081648	Gm13423	19.1	30.7	0.44	0.216148	0.862778	19.1	30.7	0.48	0.203524	0.890853	2	23202033	23203683	888	46.82	1	processed_pseudogene	predicted gene 13423 [Source:MGI Symbol;Acc:MGI:3650165]
ENSMUSG00000083064	Gm7785	23.9	38.4	0.44	0.215303	0.862585	23.9	38.4	0.56	0.132372	0.787821	1	91296045	91296936	892	45.74	1	processed_pseudogene	predicted gene 7785 [Source:MGI Symbol;Acc:MGI:3645449]
ENSMUSG00000083507	Gm12842	0.8	3	0.44	0.181303	1	0.8	3	0.44	0.210289	1	4	117825181	117825656	476	48.11	-1	processed_pseudogene	predicted gene 12842 [Source:MGI Symbol;Acc:MGI:3651050]
ENSMUSG00000084331	Gm8163	10.7	17.1	0.44	0.223503	0.946541	10.7	17.1	0.42	0.288829	1	X	60726389	60727448	1060	50.57	-1	processed_pseudogene	predicted gene 8163 [Source:MGI Symbol;Acc:MGI:3644711]
ENSMUSG00000084453	Gm24596	7.3	12.4	0.44	0.229538	0.958885	7.3	12.4	0.45	0.26132	0.998216	7	126563874	126563980	107	43.93	-1	snRNA	predicted gene, 24596 [Source:MGI Symbol;Acc:MGI:5454373]
ENSMUSG00000084803	5830444B04Rik	14	25.9	0.44	0.240617	0.958553	14	25.9	0.47	0.25335	0.899619	4	155398763	155421704	5410	46.6	-1	processed_transcript	RIKEN cDNA 5830444B04 gene [Source:MGI Symbol;Acc:MGI:3603170]
ENSMUSG00000086012	Gm15902	5.5	11.1	0.44	0.239933	0.990501	5.5	11.1	0.47	0.250313	0.998186	12	44959647	44970878	3816	38.35	-1	sense_intronic	predicted gene 15902 [Source:MGI Symbol;Acc:MGI:3802133]
ENSMUSG00000086363	A330102I10Rik	9.4	20.1	0.44	0.237124	0.955979	9.4	20.1	0.47	0.252536	0.899619	13	29014399	29040336	1772	43.24	1	lincRNA	RIKEN cDNA A330102I10 gene [Source:MGI Symbol;Acc:MGI:1925170]
ENSMUSG00000091896	Ube2d2a	167.4	235.1	0.44	0.049023	0.573465	167.4	235.1	0.45	0.0702328	0.644559	18	35771559	35807172	2483	40.25	1	protein_coding	ubiquitin-conjugating enzyme E2D 2A [Source:MGI Symbol;Acc:MGI:1930715]
ENSMUSG00000094248	Hist1h2ao	9.8	16.1	0.44	0.232062	0.950741	9.8	16.1	0.4	0.312856	1	13	21810465	21810944	480	64.17	1	protein_coding	Histone H2A type 1-B [Source:UniProtKB/Swiss-Prot;Acc:C0HKE1]
ENSMUSG00000097155	Gm26511	7.1	13.1	0.44	0.244666	0.966547	7.1	13.1	0.49	0.227911	0.994375	9	21717616	21723450	1895	47.69	-1	lincRNA	predicted gene, 26511 [Source:MGI Symbol;Acc:MGI:5477005]
ENSMUSG00000097358	Gm26773	0	6.3	0.44	0.0874386	1	0	6.3	0.52	0.0811767	1	14	118107831	118117100	2868	44.23	1	lincRNA	predicted gene, 26773 [Source:MGI Symbol;Acc:MGI:5477267]
ENSMUSG00000097998	Gm27019	1.1	6.1	0.44	0.152697	1	1.1	6.1	0.47	0.170493	1	6	31063092	31063495	404	50.99	-1	lincRNA	predicted gene, 27019 [Source:MGI Symbol;Acc:MGI:5504134]
ENSMUSG00000099689	Zfp383	1.7	6.6	0.44	0.175612	1	1.7	6.6	0.47	0.18895	1	7	29908223	29916813	3208	43.93	1	protein_coding	zinc finger protein 383 [Source:HGNC Symbol;Acc:HGNC:18609]
ENSMUSG00000101316	Gm12663	12.4	19.3	0.44	0.222332	0.902648	12.4	19.3	0.38	0.326889	0.959487	11	16635109	16636066	958	44.26	-1	processed_pseudogene	predicted gene 12663 [Source:MGI Symbol;Acc:MGI:3652168]
ENSMUSG00000102331	Gm19938	7.5	12.5	0.44	0.239375	1	7.5	12.5	0.35	0.384671	1	1	3647309	3658904	3259	39.44	-1	sense_intronic	predicted gene, 19938 [Source:MGI Symbol;Acc:MGI:5012123]
ENSMUSG00000104180	Gm37970	0.2	4.7	0.44	0.103744	1	0.2	4.7	0.54	0.0874361	1	1	122866042	122867773	1732	35.97	1	TEC	predicted gene, 37970 [Source:MGI Symbol;Acc:MGI:5611198]
ENSMUSG00000108181	C030015A19Rik	3.1	8.3	0.44	0.217128	0.990501	3.1	8.3	0.48	0.212422	0.991385	6	90386807	90389357	2551	41.16	1	TEC	RIKEN cDNA C030015A19 gene [Source:MGI Symbol;Acc:MGI:1924668]
ENSMUSG00000109154	Gm44822	3.5	7.5	0.44	0.238137	1	3.5	7.5	0.47	0.247208	1	7	49814202	49820590	6389	40.69	1	TEC	predicted gene 44822 [Source:MGI Symbol;Acc:MGI:5753398]
ENSMUSG00000109781	Gm45509	6.4	12.9	0.44	0.243809	0.972264	6.4	12.9	0.44	0.280225	0.997408	7	16406755	16407983	1229	43.69	-1	lincRNA	predicted gene 45509 [Source:MGI Symbol;Acc:MGI:5791345]
ENSMUSG00000115586	AC103672.3	0.2	2.5	0.44	0.121867	1	0.2	2.5	0.42	0.166114	1	15	24095965	24099207	3243	32.16	-1	TEC
ENSMUSG00000000938	Hoxa10	0.5	9.6	0.43	0.11048	1	0.5	9.6	0.7	0.0406671	1	6	52231197	52240854	3270	50.46	-1	protein_coding	Homeobox protein Hox-A10 [Source:UniProtKB/Swiss-Prot;Acc:P31310]
ENSMUSG00000005732	Ranbp1	727.9	1000.4	0.43	0.0132815	0.321276	727.9	1000.4	0.42	0.0298845	0.46543	16	18239784	18248732	1666	47.42	-1	protein_coding	Ran-specific GTPase-activating protein [Source:UniProtKB/Swiss-Prot;Acc:P34022]
ENSMUSG00000007216	Zfp775	11.7	19	0.43	0.241871	0.95829	11.7	19	0.43	0.282883	0.912269	6	48602063	48623227	4244	48.6	1	protein_coding	zinc finger protein 775 [Source:MGI Symbol;Acc:MGI:2683557]
ENSMUSG00000008461	Fut1	46.5	77.2	0.43	0.252188	0.889123	46.5	77.2	0.43	0.265972	0.893233	7	45617289	45621059	2786	52	1	protein_coding	fucosyltransferase 1 (H blood group) [Source:HGNC Symbol;Acc:HGNC:4012]
ENSMUSG00000015085	Entpd2	9.3	18.1	0.43	0.253537	1	9.3	18.1	0.52	0.20231	0.98668	2	25395874	25401321	2128	55.36	1	protein_coding	Ectonucleoside triphosphate diphosphohydrolase 2 [Source:UniProtKB/Swiss-Prot;Acc:O55026]
ENSMUSG00000020184	Mdm2	133.6	189.6	0.43	0.0939325	0.71119	133.6	189.6	0.47	0.0837295	0.686383	10	117688875	117710758	5083	42.58	-1	protein_coding	E3 ubiquitin-protein ligase Mdm2 [Source:UniProtKB/Swiss-Prot;Acc:P23804]
ENSMUSG00000021044	Adck1	24.8	43.9	0.43	0.2549	0.889123	24.8	43.9	0.45	0.256938	0.928102	12	88360554	88461724	5549	47.51	1	protein_coding	Uncharacterized aarF domain-containing protein kinase 1 [Source:UniProtKB/Swiss-Prot;Acc:Q9D0L4]
ENSMUSG00000021619	Atg10	28.5	45.1	0.43	0.224574	0.955534	28.5	45.1	0.44	0.246798	0.909719	13	90935356	91223968	1718	40.77	-1	protein_coding	autophagy related 10 [Source:HGNC Symbol;Acc:HGNC:20315]
ENSMUSG00000022677	Fopnl	209.4	288.4	0.43	0.0201887	0.398471	209.4	288.4	0.44	0.0344414	0.498463	16	14299244	14317405	5806	43.33	-1	protein_coding	LisH domain-containing protein FOPNL [Source:UniProtKB/Swiss-Prot;Acc:Q9CZS3]
ENSMUSG00000023206	Il15ra	31.4	46.7	0.43	0.18364	0.889123	31.4	46.7	0.41	0.228675	0.877118	2	11705290	11734317	4446	44.26	1	protein_coding	Interleukin-15 receptor subunit alpha Soluble interleukin-15 receptor subunit alpha [Source:UniProtKB/Swiss-Prot;Acc:Q60819]
ENSMUSG00000025086	Trub1	39.2	59.1	0.43	0.180678	0.837963	39.2	59.1	0.45	0.202101	0.844369	19	57452906	57491005	6395	46.85	1	protein_coding	Probable tRNA pseudouridine synthase 1 [Source:UniProtKB/Swiss-Prot;Acc:Q8C0D0]
ENSMUSG00000025289	Prdx4	137	198.3	0.43	0.160814	0.81895	137	198.3	0.39	0.231689	0.870542	X	155323918	155340754	2106	38.51	-1	protein_coding	peroxiredoxin 4 [Source:MGI Symbol;Acc:MGI:1859815]
ENSMUSG00000026201	Stk16	174.1	246.9	0.43	0.0835271	0.689344	174.1	246.9	0.46	0.0876459	0.692209	1	75210838	75215606	4518	51.58	1	protein_coding	serine/threonine kinase 16 [Source:MGI Symbol;Acc:MGI:1313271]
ENSMUSG00000026657	Frmd4a	28.6	43.6	0.43	0.226046	0.875626	28.6	43.6	0.36	0.335096	0.940294	2	4017717	4614043	23350	44.38	1	protein_coding	Mus musculus FERM domain containing 4A (Frmd4a), transcript variant 4, mRNA. [Source:RefSeq mRNA;Acc:NM_001347086]
ENSMUSG00000026857	Ntmt1	55.1	79.9	0.43	0.140104	0.794935	55.1	79.9	0.46	0.139993	0.788054	2	30807826	30823033	2798	51.55	1	protein_coding	Mus musculus N-terminal Xaa-Pro-Lys N-methyltransferase 1 (Ntmt1), transcript variant 3, mRNA. [Source:RefSeq mRNA;Acc:NM_001356434]
ENSMUSG00000026860	Sh3glb2	76.7	111	0.43	0.126927	0.772646	76.7	111	0.49	0.0918437	0.692191	2	30344809	30359337	3990	55.01	-1	protein_coding	SH3-domain GRB2-like endophilin B2 [Source:MGI Symbol;Acc:MGI:2385131]
ENSMUSG00000027291	Vps39	58.2	94.4	0.43	0.234364	0.877235	58.2	94.4	0.46	0.227031	0.868373	2	120316461	120353137	8605	46.23	-1	protein_coding	VPS39 HOPS complex subunit [Source:MGI Symbol;Acc:MGI:2443189]
ENSMUSG00000027459	Fam110a	38.2	54	0.43	0.115696	0.746684	38.2	54	0.36	0.223827	0.871624	2	151969398	151980219	2207	54.43	-1	protein_coding	Protein FAM110A [Source:UniProtKB/Swiss-Prot;Acc:Q8R184]
ENSMUSG00000027952	Pmvk	51.8	73.4	0.43	0.126755	0.772646	51.8	73.4	0.44	0.14745	0.819065	3	89454541	89469013	1713	48.9	1	protein_coding	Phosphomevalonate kinase [Source:UniProtKB/Swiss-Prot;Acc:Q9D1G2]
ENSMUSG00000028430	Nol6	37.4	54	0.43	0.125364	0.763996	37.4	54	0.43	0.171095	0.822687	4	41114427	41124455	5242	54.07	-1	protein_coding	Nucleolar protein 6 [Source:UniProtKB/Swiss-Prot;Acc:Q8R5K4]
ENSMUSG00000028693	Nasp	283.3	391.2	0.43	0.0270447	0.437723	283.3	391.2	0.52	0.00593909	0.218392	4	116601052	116627941	7518	39.93	-1	protein_coding	Nuclear autoantigenic sperm protein [Source:UniProtKB/Swiss-Prot;Acc:Q99MD9]
ENSMUSG00000028832	Stmn1	93.5	139.3	0.43	0.190722	0.84641	93.5	139.3	0.45	0.19934	0.844157	4	134468320	134473843	1922	47.19	1	protein_coding	stathmin 1 [Source:MGI Symbol;Acc:MGI:96739]
ENSMUSG00000029499	Pxmp2	7.7	12.4	0.43	0.237582	1	7.7	12.4	0.41	0.310305	1	5	110274282	110286186	1200	45.43	-1	protein_coding	peroxisomal membrane protein 2 [Source:HGNC Symbol;Acc:HGNC:9716]
ENSMUSG00000029600	Rita1	7.1	13.8	0.43	0.255542	0.97177	7.1	13.8	0.51	0.211596	0.988454	5	120594305	120612589	2836	52.18	-1	protein_coding	RBPJ-interacting and tubulin-associated protein 1 [Source:UniProtKB/Swiss-Prot;Acc:Q9D1H0]
ENSMUSG00000029765	Plxna4	3	7.2	0.43	0.233277	1	3	7.2	0.41	0.296293	1	6	32144268	32588192	14103	45.64	-1	protein_coding	plexin A4 [Source:MGI Symbol;Acc:MGI:2179061]
ENSMUSG00000030188	Magohb	141.8	194.2	0.43	0.031563	0.471924	141.8	194.2	0.38	0.0828979	0.672526	6	131284388	131293244	1720	40	-1	protein_coding
ENSMUSG00000031021	Tmem9b	238	344.4	0.43	0.153669	0.804836	238	344.4	0.48	0.10657	0.723427	7	109735834	109752875	2002	44.3	-1	protein_coding	Transmembrane protein 9B [Source:UniProtKB/Swiss-Prot;Acc:Q9JJR8]
ENSMUSG00000031212	Pgr15l	1.8	11.8	0.43	0.146629	0.95834	1.8	11.8	0.68	0.0646637	0.83224	X	97072596	97082104	5379	39.57	1	protein_coding
ENSMUSG00000032294	Pkm	182.8	256.9	0.43	0.0972989	0.714615	182.8	256.9	0.48	0.0817689	0.667391	9	59656368	59679375	5001	48.14	1	protein_coding	Pyruvate kinase PKM [Source:UniProtKB/Swiss-Prot;Acc:P52480]
ENSMUSG00000032783	Troap	8.3	13.7	0.43	0.248216	0.95834	8.3	13.7	0.42	0.30309	1	15	99074575	99083409	3520	52.46	1	protein_coding	Tastin [Source:UniProtKB/Swiss-Prot;Acc:B7ZNG4]
ENSMUSG00000033436	Armcx2	3.5	12.1	0.43	0.189312	0.989166	3.5	12.1	0.43	0.246971	0.997408	X	134804145	134809221	4532	51.72	-1	protein_coding	Armadillo repeat-containing X-linked protein 2 [Source:UniProtKB/Swiss-Prot;Acc:Q6A058]
ENSMUSG00000033730	Egr3	17.9	65.7	0.43	0.18678	0.89249	17.9	65.7	0.44	0.217754	0.877332	14	70077203	70082614	4406	55.14	1	protein_coding	Mus musculus early growth response 3 (Egr3), transcript variant 3, mRNA. [Source:RefSeq mRNA;Acc:NM_001289927]
ENSMUSG00000033767	Tmem131l	98	140.3	0.43	0.107451	0.735807	98	140.3	0.51	0.0662874	0.639934	3	83897655	84040175	11726	45.61	-1	protein_coding	Transmembrane protein 131-like [Source:UniProtKB/Swiss-Prot;Acc:Q3U3D7]
ENSMUSG00000034105	Tldc1	7.8	13.7	0.43	0.254923	0.971488	7.8	13.7	0.32	0.427575	1	8	119760076	119778416	4132	52.74	-1	protein_coding	TLD domain-containing protein 1 [Source:UniProtKB/Swiss-Prot;Acc:Q8K0P3]
ENSMUSG00000034575	Papd7	37.9	56.6	0.43	0.179682	0.8366	37.9	56.6	0.53	0.112893	0.739224	13	69497959	69534617	8918	49.28	-1	protein_coding	Non-canonical poly(A) RNA polymerase PAPD7 [Source:UniProtKB/Swiss-Prot;Acc:Q6PB75]
ENSMUSG00000035266	Helq	28	42	0.43	0.18111	0.837963	28	42	0.44	0.215352	0.898954	5	100762145	100798598	5069	45.3	-1	protein_coding	Helicase POLQ-like [Source:UniProtKB/Swiss-Prot;Acc:Q2VPA6]
ENSMUSG00000035311	Gnptab	61.2	87.7	0.43	0.147564	0.803263	61.2	87.7	0.35	0.253167	0.899619	10	88379132	88447329	5883	45.24	1	protein_coding	N-acetylglucosamine-1-phosphate transferase, alpha and beta subunits [Source:MGI Symbol;Acc:MGI:3643902]
ENSMUSG00000035547	Capn5	35.7	51.7	0.43	0.173963	0.831815	35.7	51.7	0.28	0.370088	0.946841	7	98121559	98178274	5485	52.36	-1	protein_coding	Calpain-5 [Source:UniProtKB/Swiss-Prot;Acc:O08688]
ENSMUSG00000035694	Caps2	5.3	9.6	0.43	0.255598	0.990501	5.3	9.6	0.42	0.306281	1	10	112163621	112216555	3422	39.66	1	protein_coding	Calcyphosin-2 [Source:UniProtKB/Swiss-Prot;Acc:Q8BUG5]
ENSMUSG00000037773	Pced1a	24	41.2	0.43	0.248036	0.942257	24	41.2	0.44	0.277395	0.941067	2	130417247	130424701	5072	50.01	-1	protein_coding	PC-esterase domain-containing protein 1A [Source:UniProtKB/Swiss-Prot;Acc:Q6P1Z5]
ENSMUSG00000038005	Hpf1	204.4	282.5	0.43	0.0327266	0.473337	204.4	282.5	0.5	0.0122628	0.316804	8	60890418	60908671	4612	42.07	1	protein_coding	Mus musculus histone PARylation factor 1 (Hpf1), transcript variant 2, mRNA. [Source:RefSeq mRNA;Acc:NM_001357270]
ENSMUSG00000038242	Aox4	1.1	4.5	0.43	0.180878	1	1.1	4.5	0.4	0.254402	1	1	58210397	58268597	8416	44.54	1	protein_coding	Aldehyde oxidase 4 [Source:UniProtKB/Swiss-Prot;Acc:Q3TYQ9]
ENSMUSG00000038520	Tbc1d17	39.6	58.9	0.43	0.175644	0.832654	39.6	58.9	0.52	0.0922985	0.702152	7	44834623	44849079	9726	55.13	-1	protein_coding	TBC1 domain family, member 17 [Source:MGI Symbol;Acc:MGI:2449973]
ENSMUSG00000038775	Vill	19	29.8	0.43	0.220982	0.869623	19	29.8	0.64	0.0703773	0.704639	9	119052778	119071525	4409	53.86	1	protein_coding	villin-like [Source:MGI Symbol;Acc:MGI:1201781]
ENSMUSG00000039084	Chad	0.3	2.6	0.43	0.12974	1	0.3	2.6	0.42	0.164327	1	11	94565047	94569127	1680	55.11	1	protein_coding	Chondroadherin [Source:UniProtKB/Swiss-Prot;Acc:O55226]
ENSMUSG00000039199	Zdhhc1	16.5	24.6	0.43	0.198944	0.938743	16.5	24.6	0.38	0.29174	0.919403	8	105472423	105496902	4219	49.03	-1	protein_coding	zinc finger, DHHC domain containing 1 [Source:MGI Symbol;Acc:MGI:1918046]
ENSMUSG00000040502	March9	17.2	26.3	0.43	0.214752	0.944608	17.2	26.3	0.49	0.178015	0.839563	10	127055011	127060184	3037	57.79	-1	protein_coding	E3 ubiquitin-protein ligase MARCH9 [Source:UniProtKB/Swiss-Prot;Acc:Q3TZ87]
ENSMUSG00000042524	Sun2	38.6	54.8	0.43	0.103733	0.728619	38.6	54.8	0.42	0.16698	0.842342	15	79724070	79742536	5420	53.45	-1	protein_coding	SUN domain-containing protein 2 [Source:UniProtKB/Swiss-Prot;Acc:Q8BJS4]
ENSMUSG00000043015	Nemp2	30.6	50	0.43	0.241574	0.882671	30.6	50	0.58	0.11461	0.771614	1	52630703	52651919	7078	43.27	1	protein_coding	Nuclear envelope integral membrane protein 2 [Source:UniProtKB/Swiss-Prot;Acc:Q8CB65]
ENSMUSG00000046111	Cep295	113.5	159.6	0.43	0.0717294	0.65586	113.5	159.6	0.55	0.0117624	0.31279	9	15316915	15357788	16238	39.24	-1	protein_coding	centrosomal protein 295 [Source:HGNC Symbol;Acc:HGNC:29366]
ENSMUSG00000046687	Gm5424	14.3	21.8	0.43	0.201844	0.944608	14.3	21.8	0.44	0.235033	0.889837	10	62071123	62072362	1240	53.95	1	processed_pseudogene	predicted gene 5424 [Source:MGI Symbol;Acc:MGI:3643173]
ENSMUSG00000051910	Sox6	135	190	0.43	0.094326	0.707399	135	190	0.47	0.0883597	0.704639	7	115470872	116038796	14832	40.1	-1	protein_coding	SRY (sex determining region Y)-box 6 [Source:MGI Symbol;Acc:MGI:98368]
ENSMUSG00000053740	Gm6457	8.7	16.5	0.43	0.256835	1	8.7	16.5	0.48	0.236174	0.997408	18	14570101	14570915	815	49.82	1	processed_pseudogene	predicted pseudogene 6457 [Source:MGI Symbol;Acc:MGI:3648519]
ENSMUSG00000054072	Iigp1	1.7	46.8	0.43	0.105391	0.735871	1.7	46.8	0.43	0.136114	0.806329	18	60376029	60392627	3121	40.2	1	protein_coding	Interferon-inducible GTPase 1 [Source:UniProtKB/Swiss-Prot;Acc:Q9QZ85]
ENSMUSG00000054136	Adm2	2.8	5.7	0.43	0.253362	1	2.8	5.7	0.43	0.286201	1	15	89322720	89324731	1298	57.31	1	protein_coding	ADM2 Adrenomedullin-2 Intermedin-short [Source:UniProtKB/Swiss-Prot;Acc:Q7TNK8]
ENSMUSG00000054477	Kcnn2	1.2	3.9	0.43	0.19971	1	1.2	3.9	0.39	0.270837	1	18	45268860	45686024	7321	39.39	1	protein_coding	potassium intermediate/small conductance calcium-activated channel, subfamily N, member 2 [Source:MGI Symbol;Acc:MGI:2153182]
ENSMUSG00000058818	Pirb	8.6	14.1	0.43	0.236072	0.963229	8.6	14.1	0.5	0.200117	0.98668	7	3711409	3720391	4471	48.84	-1	protein_coding	Leukocyte immunoglobulin-like receptor subfamily B member 3 [Source:UniProtKB/Swiss-Prot;Acc:P97484]
ENSMUSG00000061510	Gm10101	0.2	4.7	0.43	0.109857	1	0.2	4.7	0.48	0.114115	1	14	46829109	46832027	2919	42.86	-1	bidirectional_promoter_lncRNA
ENSMUSG00000063445	Nmral1	19	33.5	0.43	0.254688	0.894065	19	33.5	0.4	0.330288	0.953028	16	4710059	4719356	3891	48.05	-1	protein_coding	NmrA-like family domain-containing protein 1 [Source:UniProtKB/Swiss-Prot;Acc:Q8K2T1]
ENSMUSG00000063919	Srrm4	3.8	12	0.43	0.209109	1	3.8	12	0.51	0.186706	1	5	116439275	116591817	8678	47.67	-1	protein_coding	serine/arginine repetitive matrix 4 [Source:MGI Symbol;Acc:MGI:1916205]
ENSMUSG00000069083	Gm10259	13.9	21.8	0.43	0.212566	0.944608	13.9	21.8	0.43	0.260451	0.921039	3	25211016	25212605	1590	46.23	-1	processed_pseudogene	predicted pseudogene 10259 [Source:MGI Symbol;Acc:MGI:3704211]
ENSMUSG00000069135	Fgfr1op	101.4	150.8	0.43	0.196821	0.858942	101.4	150.8	0.44	0.217792	0.868373	17	8165501	8196804	4008	42.7	1	protein_coding	FGFR1 onco partner [Source:UniProtKB/Swiss-Prot;Acc:Q66JX5]
ENSMUSG00000070327	Rnf213	166.2	249.9	0.43	0.21146	0.867633	166.2	249.9	0.26	0.454028	0.967166	11	119393100	119487418	16888	48.39	1	protein_coding	ring finger protein 213 [Source:MGI Symbol;Acc:MGI:1289196]
ENSMUSG00000072978	Gm5830	0.3	2.6	0.43	0.132743	1	0.3	2.6	0.41	0.173137	1	1	78967637	78968079	443	51.24	-1	processed_pseudogene	predicted pseudogene 5830 [Source:MGI Symbol;Acc:MGI:3647375]
ENSMUSG00000078238	Gm12854	47.3	73.1	0.43	0.221496	0.867156	47.3	73.1	0.28	0.44947	0.981046	4	116067268	116067564	297	46.13	1	processed_pseudogene	predicted gene 12854 [Source:MGI Symbol;Acc:MGI:3650410]
ENSMUSG00000080776	Gm12174	281.8	388.9	0.43	0.0457721	0.549625	281.8	388.9	0.42	0.0724341	0.658279	11	46727818	46728630	813	46.49	1	processed_pseudogene	predicted gene 12174 [Source:MGI Symbol;Acc:MGI:3651722]
ENSMUSG00000083725	Gm11865	4	10.6	0.43	0.229413	1	4	10.6	0.45	0.254024	0.998216	4	16246269	16249514	859	49.85	1	processed_pseudogene	predicted gene 11865 [Source:MGI Symbol;Acc:MGI:3650453]
ENSMUSG00000085415	Selenok-ps1	32.1	48.5	0.43	0.192953	0.847727	32.1	48.5	0.44	0.221942	0.871624	11	23558058	23558842	785	42.68	-1	processed_transcript	selenoprotein K, pseudogene 1 [Source:MGI Symbol;Acc:MGI:3649370]
ENSMUSG00000085811	Cep112it	1	6.1	0.43	0.151135	1	1	6.1	0.41	0.199269	1	11	108820333	108826942	4813	44.16	1	sense_intronic	centrosomal protein 112, intronic transcript [Source:MGI Symbol;Acc:MGI:3649867]
ENSMUSG00000086502	B130055M24Rik	1.3	5.4	0.43	0.17218	1	1.3	5.4	0.44	0.20705	1	7	127448636	127460360	1988	45.71	1	processed_transcript	RIKEN cDNA B130055M24 gene [Source:MGI Symbol;Acc:MGI:3590645]
ENSMUSG00000089810	Gm16536	25.1	39	0.43	0.222147	0.867221	25.1	39	0.62	0.0569657	0.64209	9	45856769	45858357	1589	44.81	-1	antisense	predicted gene 16536 [Source:MGI Symbol;Acc:MGI:4414956]
ENSMUSG00000089987	Gpx2-ps1	59.3	91.1	0.43	0.215809	0.867156	59.3	91.1	0.44	0.230908	0.871624	7	100264675	100265245	571	53.24	1	processed_pseudogene	glutathione peroxidase 2, pseudogene 1 [Source:MGI Symbol;Acc:MGI:106627]
ENSMUSG00000091007	D630036H23Rik	0.3	3.3	0.43	0.121901	1	0.3	3.3	0.46	0.138149	1	12	36381242	36382181	940	62.34	-1	protein_coding
ENSMUSG00000092454	Gm2991	1.2	4.7	0.43	0.189908	1	1.2	4.7	0.48	0.185007	1	15	65928454	65928933	480	58.96	-1	processed_pseudogene	predicted pseudogene 2991 [Source:MGI Symbol;Acc:MGI:3781169]
ENSMUSG00000097595	1500002F19Rik	1.1	9.8	0.43	0.13619	1	1.1	9.8	0.66	0.0647171	1	7	132874739	132931197	1239	43.96	-1	processed_transcript	RIKEN cDNA 1500002F19 gene [Source:MGI Symbol;Acc:MGI:1923933]
ENSMUSG00000102764	Gm37183	7.8	14.8	0.43	0.251367	0.95834	7.8	14.8	0.46	0.260701	1	14	64835855	64839259	3405	41.41	-1	TEC	predicted gene, 37183 [Source:MGI Symbol;Acc:MGI:5610411]
[truncated: 19,580 more rows]
