# Supplementary material for: Epigenetic modifier balances Mapk and Wnt signalling in differentiation of goblet and Paneth cells
Source: Life Sci Alliance. 2022 Jan 21;5(4):e202101187. doi: 10.26508/lsa.202101187 (PMC8807877; doi:10.26508/lsa.202101187)
Supplement: Supplementary file 3 [file LSA-2021-01187_TableS2.docx]

### Supplementary Table 2: Primer sequences for qRT-PCR.

| RT-PCR primer | species | sequence (5’-3’) |
| --- | --- | --- |
| Axin2_fwd | mouse | AGTCAGCAGAGGGACAGGAA |
| Axin2_rev | mouse | CTTCGTACATGGGGAGCACT |
| ChgA_fwd | mouse | AGAAGTGTTTGAGAACCAGAGCCC |
| ChgA_rev | mouse | TTGGTGATTGGGTATTGGTGGCTG |
| EphB2_fwd | mouse | ACTATGAGAAGCAGGAGCTCAGT |
| EphB2_rev | mouse | GCTCAAACCCCCGTCTGTT |
| EphB3_fwd | mouse | TTCACGACAGTGGGTGACTG |
| EphB3_rev | mouse | CGTTGGAGCTGAGTGTCAGA |
| Gapdh_fwd (Heuberger *et al*, 2014) | mouse | AAATGGTGAAGGTCGGTGTGAACG |
| Gapdh_rev (Heuberger *et al*, 2014) | mouse | TGATGACAAGCTTCCCATTCTCGG |
| Gata4_fwd | mouse | AAACGGAAGCCCAAGAACCT |
| Gata4_rev | mouse | ACACAGTACTGAATGTCTGGGA |
| Gob5_fwd (Heuberger *et al*, 2014) | mouse | TGAAATTGTGCTGCTGACCGATGG |
| Gob5_rev (Heuberger *et al*, 2014) | mouse | TGCTGCGAAAGCATCAACAAGACC |
| Hes1_fwd | mouse | TGGAAATGACTGTGAAGCACCTCC |
| Hes1_rev | mouse | TTGATCTGGGTCATGCAGTTGGC |
| Itf_fwd | mouse | TGGGATAGCTGCAGATTACGTTGG |
| Itf_rev | mouse | TTTGAAGCACCAGGGCACATTTGG |
| Klf4_fwd | mouse | TTAGGCTGTTCTTTTCCGGGGCCACGA |
| Klf4_rev | mouse | TTAGGCTGTTCTTTTCCGGGGCCACGA |
| Krt20_fwd | mouse | AACTGGCAATGCAGAACCTGAACG |
| Krt20_rev | mouse | TAGCATTGTCAATTCGCAGGACGC |
| Lyz_fwd (Heuberger *et al*, 2014) | mouse | GCAGCCATACAATGTGCAAAGAGG |
| Lyz_rev (Heuberger *et al*, 2014) | mouse | TTTGCCCTGTTTCTGCTGAAGTCC |
| Math1_fwd (Shroyer *et al*, 2005) | mouse | ATGCACGGGCTGAACCA |  |
| Math1_rev (Shroyer *et al*, 2005) | mouse | TCGTTGTTGAAGGACGGGATA |
| Mll1_fwd | mouse | TGAGCTGCAGATGACTGGTTA |
| Mll1_rev | mouse | CCAGAGCATCAGAGGAGAGC |
| Mmp7_fwd | mouse | AGGAGTGAACTTCCTGTTTGCTGC |
| Mmp7_rev | mouse | TTCTGAATGCCTGCAATGTCGTCC |
| Muc2_fwd (Heuberger *et al*, 2014) | mouse | TGTGATGCCAATGACAAGGTGTCC |
| Muc2_rev (Heuberger *et al*, 2014) | mouse | ACCACAATGTTGATGCCAGACTCG |
| Neurog3_fwd | mouse | ACGCAATTTACTCCAGGCGA |
| Neurog3_rev | mouse | GAGGCGCCATCCTAGTTCTC |
| Spdef_fwd (Heuberger *et al*, 2014) | mouse | AACATGTATCCCGACGATAGCAGC |
| Spdef_rev (Heuberger *et al*, 2014) | mouse | TCAATATCTTTCAGGACCTCGCCC |
| Syp_fwd | mouse | TTGGCTTCGTGAAGGTGC |
| Syp_rev | mouse | CTGCCGCACGTAGCAAAG |
| MATH1_fwd | human | CAGCTGCGCAATGTTATCCC |
| MATH1_rev | human | TTGTAGCAGCTCGGACAAGG |
| GAPDH_fwd | human | AAGGTGAAGGTCGGAGTCAA |
| GAPDH_rev | human | AATGAAGGGGTCATTGATGG |
| GATA6_fwd | human | TGCCAACTGTCACACCACAA |
| GATA6_rev | human | CATAGCAAGTGGTCTGGGCA |
